# Supplementary material for: STRUCT: a statistical approach to identify RNA secondary structures from raw sequencing data, bypassing multiple sequence alignment
Source: bioRxiv preprint, doi:10.1101/2024.10.03.616574, version 2 (2024-12-04)
Supplement: Supplemental Table [file 616574_file03.xlsx]

## Sheet: Overview
Overview of Supplementary Tables
Tab-Name	Content
Suppl_Table_1	List of structure-significant anchors from HIV Host 1124 that have Rfam match, detected by STRUCT (compactor mode).
Suppl_Table_2	List of structure-significant anchors from HIV Host 1194 that have Rfam match, detected by STRUCT (compactor mode).
Suppl_Table_3	List of structure-significant anchors from HIV Host 1211 that have Rfam match, detected by STRUCT (compactor mode).
Suppl_Table_4	List of structure-significant anchors from HIV Host 1532 that have Rfam match, detected by STRUCT (compactor mode).
Suppl_Table_5	List of structure-significant anchors from HIV Host 548 that have Rfam match, detected by STRUCT (compactor mode).
Suppl_Table_6	List of structure-significant anchors from HIV Host 583 that have Rfam match, detected by STRUCT (compactor mode).
Suppl_Table_7	List of structure-significant anchors from HIV Host 746 that have Rfam match, detected by STRUCT (compactor mode).
Suppl_Table_8	List of structure-significant anchors from mosquito metatranscriptomics that have Rfam match, detected by STRUCT (compactor mode).
Suppl_Table_9	List of structure-significant anchors from mosquito metatranscriptomics that aligned to viruses by BLASTn, detected by STRUCT (compactor mode). The Blast_hit column represent the BLASTn result with smallest E-value of the corresponding base compactor.
* Structure elements that have been drawn in the main text are highlighted in yellow.

## Sheet: Suppl_Table_1
anchor	base_compactor	compactor	support	segment_index	base_S1	base_S2	weight	strucNotation_1	strucNotation_2	anchor_p_BH	Rfam_match
CAAGGCAAGCTTTATTGAGGCTTAAGC	CAAGGCAAGCTTTATTGAGGCTTAAGCAGTGGGTTCTTTAGTTAGCCAGAGAGCTCTTAGGCTCAGATCTGGTCTAACCAG	CAAGGCAAGCTTTATTGAGGCTTAAGCAGTGGGTTCCTTAGTTAGCCAGAGAGCTCCTAGGCTCAGATCTGGTCTAACTAG	33	D2	AGTGGGTTCTTTAGCTTAGGCTCAGAT	TTAGCCAGAGAGCTCTGGTCTAACCAG	0.375		----{------(--)------}------t--	0.0299453	Trans-activation response element (TAR)
CAAGGCAAGCTTTATTGAGGCTTAAGC	CAAGGCAAGCTTTATTGAGGCTTAAGCAGTGGGTTCTTTAGTTAGCCAGAGAGCTCTTAGGCTCAGATCTGGTCTAACCAG	CAAGGCAAGCTTTATTGAGGCTTAAGCAGTGGGTTCCCTAGTTAGCCAGAGAGCTCCCAGGCTCAGATCTGGTCTAACCAG	30	D2	AGTGGGTTCTTTAGCTTAGGCTCAGAT	TTAGCCAGAGAGCTCTGGTCTAACCAG	0.340909		----{------(--)------}---------	0.0299453	Trans-activation response element (TAR)
CAAGGCAAGCTTTATTGAGGCTTAAGC	CAAGGCAAGCTTTATTGAGGCTTAAGCAGTGGGTTCTTTAGTTAGCCAGAGAGCTCTTAGGCTCAGATCTGGTCTAACCAG	CAAGGCAAGCTTTATTGAGGCTTAAGCAGTGGACTAATGGGAAAATTTAAAGTGCAACCAATCTGAGTCAACAGATTTCTT	15	D2	AGTGGGTTCTTTAGCTTAGGCTCAGAT	TTAGCCAGAGAGCTCTGGTCTAACCAG	0.170455		aa-a{tTTa-a(gt)gc-AAc}agattt-tt	0.0299453
CAAGGCAAGCTTTATTGAGGCTTAAGC	CAAGGCAAGCTTTATTGAGGCTTAAGCAGTGGGTTCTTTAGTTAGCCAGAGAGCTCTTAGGCTCAGATCTGGTCTAACCAG	CAAGGCAAGCTTTATTGAGGCTTAAGCAGTGGGTTCCTTGATCCTCGCCTACTAACAGGCGGCCTTAACCGTAGCACTGGT	10	D2	AGTGGGTTCTTTAGCTTAGGCTCAGAT	TTAGCCAGAGAGCTCTGGTCTAACCAG	0.113636		-cct{-gccTa(ct)aA-c-t}agc-ctggt	0.0299453
CTCGCACCTATCTCTCTCCTTCTAGCC	CTCGCACCTATCTCTCTCCTTCTAGCCTCCGCTAGTCAAAATTTTGGCGTACTCACCAGTCGCCGCCCCTCGCCTCTTGCC	CTCGCACCTATCTCTCTCCTTCTAGCCTCCGCTAGTCAAAATTTTGGCGTACTCACTAGTCGCCGCCTTTCGCCTCTTGCC	3	D1	TCCGCTAGTCAAAATTTTGGCGTACTCA	CCAGTCGCCGCCCCTCGCCTCTTGCC	0.5	---------{-----()-----}---------		0.0344133	HIV-1 stem-loop 3 Psi packaging signal
CTCGCACCTATCTCTCTCCTTCTAGCC	CTCGCACCTATCTCTCTCCTTCTAGCCTCCGCTAGTCAAAATTTTGGCGTACTCACCAGTCGCCGCCCCTCGCCTCTTGCC	CTCGCACCTATCTCTCTCCTTCTAGCCTCCGCTAGTCAAAATTTTGGCGTACTCACTAGTCGCCGCCCTTCGCCTCCTGTC	2	D1	TCCGCTAGTCAAAATTTTGGCGTACTCA	CCAGTCGCCGCCCCTCGCCTCTTGCC	0.333333	---------{-----()-----}---------		0.0344133	HIV-1 stem-loop 3 Psi packaging signal
CTCGCACCTATCTCTCTCCTTCTAGCC	CTCGCACCTATCTCTCTCCTTCTAGCCTCCGCTAGTCAAAATTTTGGCGTACTCACCAGTCGCCGCCCCTCGCCTCTTGCC	CTCGCACCTATCTCTCTCCTTCTAGCCTCCGCTAGTCAAAATTTTGGCGTACTCACTAGTCGCCGCCCTTCCTGTCTCTTA	1	D1	TCCGCTAGTCAAAATTTTGGCGTACTCA	CCAGTCGCCGCCCCTCGCCTCTTGCC	0.166667	---------{-----()-----}---------		0.0344133	HIV-1 stem-loop 3 Psi packaging signal
GGCAAGCTTTATTGAGGCTTAAGCAGT	GGCAAGCTTTATTGAGGCTTAAGCAGTGGGTTCTTTAGTTAGCCAGAGAGCTCTTAGGCTCAGATCTGGTCTAACCAGAGA	GGCAAGCTTTATTGAGGCTTAAGCAGTGGGTTCCCTAGTTAGCCAGAGAGCTCCCAGGCTCAGATCTGGTCTAACCAGAGA	55	D3	GGGTTCTTTAGTTAGTCTAACCAGAGA	GCCAGAGAGCTCTTAGGCTCAGATCTG	0.404412	------cc--{-----(-)-----}------		0.0374314	Trans-activation response element (TAR)
GGCAAGCTTTATTGAGGCTTAAGCAGT	GGCAAGCTTTATTGAGGCTTAAGCAGTGGGTTCTTTAGTTAGCCAGAGAGCTCTTAGGCTCAGATCTGGTCTAACCAGAGA	GGCAAGCTTTATTGAGGCTTAAGCAGTGGGTTCCTTAGTTAGCCAGAGAGCTCCTAGGCTCAGATCTGGTCTAACTAGAGA	31	D3	GGGTTCTTTAGTTAGTCTAACCAGAGA	GCCAGAGAGCTCTTAGGCTCAGATCTG	0.227941	------c---{-----(-)-----}t-----		0.0374314	Trans-activation response element (TAR)
GGCAAGCTTTATTGAGGCTTAAGCAGT	GGCAAGCTTTATTGAGGCTTAAGCAGTGGGTTCTTTAGTTAGCCAGAGAGCTCTTAGGCTCAGATCTGGTCTAACCAGAGA	GGCAAGCTTTATTGAGGCTTAAGCAGTGGGTTCCTTGATCCTCGCCTACTAACAGGCGGCCTTAACCGTAGCACTGGTGAA	28	D3	GGGTTCTTTAGTTAGTCTAACCAGAGA	GCCAGAGAGCTCTTAGGCTCAGATCTG	0.205882	------c--g{A-cct(a)gc-cT}ggtga-		0.0374314
GGCAAGCTTTATTGAGGCTTAAGCAGT	GGCAAGCTTTATTGAGGCTTAAGCAGTGGGTTCTTTAGTTAGCCAGAGAGCTCTTAGGCTCAGATCTGGTCTAACCAGAGA	GGCAAGCTTTATTGAGGCTTAAGCAGTGGACTAATGGGAAAATTTAAAGTGCAACCAATCTGAGTCAACAGATTTCTTCCA	22	D3	GGGTTCTTTAGTTAGTCTAACCAGAGA	GCCAGAGAGCTCTTAGGCTCAGATCTG	0.161765	--ac-aa-gg{-AA-C(a)GaTTt}-ttcc-		0.0374314
AAGGCAAGCTTTATTGAGGCTTAAGCA	AAGGCAAGCTTTATTGAGGCTTAAGCAGTGGGTTCTTTAGTTAGCCAGAGAGCTCTTAGGCTCAGATCTGGTCTAACCAGA	AAGGCAAGCTTTATTGAGGCTTAAGCAGTGGGTTCCCTAGTTAGCCAGAGAGCTCCCAGGCTCAGATCTGGTCTAACCAGA	6	D2	GTGGGTTCTTTAGTTTAGGCTCAGATC	TAGCCAGAGAGCTCTGGTCTAACCAGA	0.315789		---{------(--)------}----------	0.0490057	Trans-activation response element (TAR)
AAGGCAAGCTTTATTGAGGCTTAAGCA	AAGGCAAGCTTTATTGAGGCTTAAGCAGTGGGTTCTTTAGTTAGCCAGAGAGCTCTTAGGCTCAGATCTGGTCTAACCAGA	AAGGCAAGCTTTATTGAGGCTTAAGCAGTGGGTTCCTTAGTTAGCCAGAGAGCTCCTAGGCTCAGATCTGGTCTAACTAGA	6	D2	GTGGGTTCTTTAGTTTAGGCTCAGATC	TAGCCAGAGAGCTCTGGTCTAACCAGA	0.315789		---{------(--)------}------t---	0.0490057	Trans-activation response element (TAR)
AAGGCAAGCTTTATTGAGGCTTAAGCA	AAGGCAAGCTTTATTGAGGCTTAAGCAGTGGGTTCTTTAGTTAGCCAGAGAGCTCTTAGGCTCAGATCTGGTCTAACCAGA	AAGGCAAGCTTTATTGAGGCTTAAGCAGTGGACTAATGGGAAAATTTAAAGTGCAACCAATCTGAGTCAACAGATTTCTTC	4	D2	GTGGGTTCTTTAGTTTAGGCTCAGATC	TAGCCAGAGAGCTCTGGTCTAACCAGA	0.210526		a-a{tTTa-a(gt)gcaAAc}agattt-ttc	0.0490057
AAGGCAAGCTTTATTGAGGCTTAAGCA	AAGGCAAGCTTTATTGAGGCTTAAGCAGTGGGTTCTTTAGTTAGCCAGAGAGCTCTTAGGCTCAGATCTGGTCTAACCAGA	AAGGCAAGCTTTATTGAGGCTTAAGCAGTGGGTTCCTTGATCCTCGCCTACTAACAGGCGGCCTTAACCGTAGCACTGGTG	3	D2	GTGGGTTCTTTAGTTTAGGCTCAGATC	TAGCCAGAGAGCTCTGGTCTAACCAGA	0.157895		cct{-gccTa(ct)aA-c-t}agc-ctggtg	0.0490057
		s

## Sheet: Suppl_Table_2
anchor	base_compactor	compactor	support	segment_index	base_S1	base_S2	weight	strucNotation_1	strucNotation_2	anchor_p_BH	Rfam_match
GGAAACCAGAGGAGCTCTCTCGACGCA	GGAAACCAGAGGAGCTCTCTCGACGCAGGTTCACCAGTACTACGGTTAAGGCCGCCTGTTGGTGGGCGGGGGTCAAGCAGG	GGAAACCAGAGGAGCTCTCTCGACGCAGGACTCGGCTTGCTGAAGCGCGCACGGCAAGAGGCGAGGGGCGGCGGCTTAAAA	12	D2	GGTTCACCAGTACTCTGTTGGTGGGCG	ACGGTTAAGGCCGCGGGGTCAAGCAGG	0.5	--ac{TCGgC(t-g--aa-a)G-CGA}--g-		5.74164e-06	Human immunodeficiency virus type 1 dimerisation initiation site
GGAAACCAGAGGAGCTCTCTCGACGCA	GGAAACCAGAGGAGCTCTCTCGACGCAGGTTCACCAGTACTACGGTTAAGGCCGCCTGTTGGTGGGCGGGGGTCAAGCAGG	GGAAACCAGAGGAGCTCTCTCGACGCAGGACTCGGCTTGCTGAAGCGCGCACGGCAAGAGGCGAGGGGCGGCGGCTGGTAA	7	D2	GGTTCACCAGTACTCTGTTGGTGGGCG	ACGGTTAAGGCCGCGGGGTCAAGCAGG	0.291667	--ac{TCGgC(t-g--aa-a)G-CGA}--g-		5.74164e-06	Human immunodeficiency virus type 1 dimerisation initiation site
GGAAACCAGAGGAGCTCTCTCGACGCA	GGAAACCAGAGGAGCTCTCTCGACGCAGGTTCACCAGTACTACGGTTAAGGCCGCCTGTTGGTGGGCGGGGGTCAAGCAGG	GGAAACCAGAGGAGCTCTCTCGACGCAGGACTCGGCTTGCTGAAGCGCGCACGGCAAGAGGCGAAGGGCGGCGGCTAGTAA	5	D2	GGTTCACCAGTACTCTGTTGGTGGGCG	ACGGTTAAGGCCGCGGGGTCAAGCAGG	0.208333	--ac{TCGgC(t-g--aa-a)G-CGA}a-g-		5.74164e-06	Human immunodeficiency virus type 1 dimerisation initiation site
AGGGAAACCAGAGGAGCTCTCTCGACG	AGGGAAACCAGAGGAGCTCTCTCGACGCAGGTTCACCAGTACTACGGTTAAGGCCGCCTGTTGGTGGGCGGGGGTCAAGCA	AGGGAAACCAGAGGAGCTCTCTCGACGCAGGACTCGGCTTGCTGAAGCGCGCACGGCAAGAGGCGAGGGGCGGCGGCTTAA	47	D2	CAGGTTCACCAGTAGCCTGTTGGTGGG	CTACGGTTAAGGCCCGGGGGTCAAGCA	0.326389	----ac{TCGgC(t-g--aa-a)G-CGA}--		0.00564541	Human immunodeficiency virus type 1 dimerisation initiation site
AGGGAAACCAGAGGAGCTCTCTCGACG	AGGGAAACCAGAGGAGCTCTCTCGACGCAGGTTCACCAGTACTACGGTTAAGGCCGCCTGTTGGTGGGCGGGGGTCAAGCA	AGGGAAACCAGAGGAGCTCTCTCGACGCAGGACTCGGCTTGCTGAAGCGCGCACGGCAAGAGGCGAAGGGCGGCGGCTAGT	38	D2	CAGGTTCACCAGTAGCCTGTTGGTGGG	CTACGGTTAAGGCCCGGGGGTCAAGCA	0.263889	----ac{TCGgC(t-g--aa-a)G-CGA}a-		0.00564541	Human immunodeficiency virus type 1 dimerisation initiation site
AGGGAAACCAGAGGAGCTCTCTCGACG	AGGGAAACCAGAGGAGCTCTCTCGACGCAGGTTCACCAGTACTACGGTTAAGGCCGCCTGTTGGTGGGCGGGGGTCAAGCA	AGGGAAACCAGAGGAGCTCTCTCGACGCAGGACTCGGCTTGCTGAAGCGCGCACGGCAAGAGGCGAGGGGCGGCGGCTGGT	34	D2	CAGGTTCACCAGTAGCCTGTTGGTGGG	CTACGGTTAAGGCCCGGGGGTCAAGCA	0.236111	----ac{TCGgC(t-g--aa-a)G-CGA}--		0.00564541	Human immunodeficiency virus type 1 dimerisation initiation site
AGGGAAACCAGAGGAGCTCTCTCGACG	AGGGAAACCAGAGGAGCTCTCTCGACGCAGGTTCACCAGTACTACGGTTAAGGCCGCCTGTTGGTGGGCGGGGGTCAAGCA	AGGGAAACCAGAGGAGCTCTCTCGACGCAGGACTCGGCTTGCTGAAGCGCGCACGGCTTTTGGTTTCCATCTTCCTGGCAA	25	D2	CAGGTTCACCAGTAGCCTGTTGGTGGG	CTACGGTTAAGGCCCGGGGGTCAAGCA	0.173611	----ac{tcggC(t-g--t-t-)G-t-t}cc		0.00564541
GGGAAACCAGAGGAGCTCTCTCGACGC	GGGAAACCAGAGGAGCTCTCTCGACGCAGGTTCACCAGTACTACGGTTAAGGCCGCCTGTTGGTGGGCGGGGGTCAAGCAG	GGGAAACCAGAGGAGCTCTCTCGACGCAGGACTCGGCTTGCTGAAGCGCGCACGGCAAGAGGCGAGGGGCGGCGGCTGGTA	22	D2	AGGTTCACCAGTACCCTGTTGGTGGGC	TACGGTTAAGGCCGGGGGGTCAAGCAG	0.431373	---ac{TCGgC(t-g--aa-a)G-CGA}--g		0.0253366	Human immunodeficiency virus type 1 dimerisation initiation site
GGGAAACCAGAGGAGCTCTCTCGACGC	GGGAAACCAGAGGAGCTCTCTCGACGCAGGTTCACCAGTACTACGGTTAAGGCCGCCTGTTGGTGGGCGGGGGTCAAGCAG	GGGAAACCAGAGGAGCTCTCTCGACGCAGGACTCGGCTTGCTGAAGCGCGCACGGCAAGAGGCGAGGGGCGGCGGCTTAAA	19	D2	AGGTTCACCAGTACCCTGTTGGTGGGC	TACGGTTAAGGCCGGGGGGTCAAGCAG	0.372549	---ac{TCGgC(t-g--aa-a)G-CGA}--g		0.0253366	Human immunodeficiency virus type 1 dimerisation initiation site
GGGAAACCAGAGGAGCTCTCTCGACGC	GGGAAACCAGAGGAGCTCTCTCGACGCAGGTTCACCAGTACTACGGTTAAGGCCGCCTGTTGGTGGGCGGGGGTCAAGCAG	GGGAAACCAGAGGAGCTCTCTCGACGCAGGACTCGGCTTGCTGAAGCGCGCACGGCTTTTGGTTTCCATCTTCCTGGCAAA	10	D2	AGGTTCACCAGTACCCTGTTGGTGGGC	TACGGTTAAGGCCGGGGGGTCAAGCAG	0.196078	---ac{tcggC(t-g--t-t-)G-t-t}cca		0.0253366
GAGCCTGGGAGCTCTCTGGCTAACTAG	GAGCCTGGGAGCTCTCTGGCTAACTAGGGAACCCACTGCTTAAGCCTCAATAAAGCTTGCCTTGAGTGCTTCAAGTAGTGT	GAGCCTGGGAGCTCTCTGGCTAACTAGGGAACCCACTGCTTAAGCCTCAATAAAGCTTGCCTTGAGTGCTTCAAGTAGCTG	4	D3	GGAACCCACTGCTTCTTCAAGTAGTGT	AAGCCTCAATAAAGCTTGCCTTGAGTG	0.666667		----{-----(-----------)-----}--	0.0423572	Trans-activation response element (TAR)
GAGCCTGGGAGCTCTCTGGCTAACTAG	GAGCCTGGGAGCTCTCTGGCTAACTAGGGAACCCACTGCTTAAGCCTCAATAAAGCTTGCCTTGAGTGCTTCAAGTAGTGT	GAGCCTGGGAGCTCTCTGGCTAACTAGGGAACCCACTGCTTAAGCCTCAATAAAGCTTGCCTTGAGTGCTTCAAGTCTGTC	1	D3	GGAACCCACTGCTTCTTCAAGTAGTGT	AAGCCTCAATAAAGCTTGCCTTGAGTG	0.166667		----{-----(-----------)-----}--	0.0423572	Trans-activation response element (TAR)
GAGCCTGGGAGCTCTCTGGCTAACTAG	GAGCCTGGGAGCTCTCTGGCTAACTAGGGAACCCACTGCTTAAGCCTCAATAAAGCTTGCCTTGAGTGCTTCAAGTAGTGT	GAGCCTGGGAGCTCTCTGGCTAACTAGGGAACCCGGCTTAAGCAGTGGGTTCCCTAGTTAGCCAGAGAGCTCCCAGGCTCA	1	D3	GGAACCCACTGCTTCTTCAAGTAGTGT	AAGCCTCAATAAAGCTTGCCTTGAGTG	0.166667		gcag{TggGt(-ccctag-tag)cCagA}ga	0.0423572	Trans-activation response element (TAR)

## Sheet: Suppl_Table_3
anchor	base_compactor	compactor	support	segment_index	base_S1	base_S2	weight	strucNotation_1	strucNotation_2	anchor_p_BH	Rfam_match
AAAATTGCACTAAAAGACAGGCTAATT	AAAATTGCACTAAAAGACAGGCTAATTTTTTAAAGAAGATCTGGCCTTCCCACAAGGGGAGGCCAAAGAACTTCCTCCAGA	AAAATTGCACTAAAAGACAGGCTAATTTTTTAGGGAAGATCTGGCCTTCCCACAAGGGAAGGCCAGGGAACTTCCTTCAGA	2	D1	TTTTAAAGAAGATCTGGCCTTCCCACAA	GGGGAGGCCAAAGAACTTCCTCCAGA	0.4		--{-A---(---gg------)---T-}---	4.07519e-05	HIV Ribosomal frameshift signal
AAAATTGCACTAAAAGACAGGCTAATT	AAAATTGCACTAAAAGACAGGCTAATTTTTTAAAGAAGATCTGGCCTTCCCACAAGGGGAGGCCAAAGAACTTCCTCCAGA	AAAATTGCACTAAAAGACAGGCTAATTTTTTAGGGAAGATCTGGCCTTCCCACAGGCGAAGGCCAGGGAACTTCACTCAGA	1	D1	TTTTAAAGAAGATCTGGCCTTCCCACAA	GGGGAGGCCAAAGAACTTCCTCCAGA	0.2		-c{-A---(---gg------)-acT-}---	4.07519e-05	HIV Ribosomal frameshift signal
AAAATTGCACTAAAAGACAGGCTAATT	AAAATTGCACTAAAAGACAGGCTAATTTTTTAAAGAAGATCTGGCCTTCCCACAAGGGGAGGCCAAAGAACTTCCTCCAGA	AAAATTGCACTAAAAGACAGGCTAATTTTTTAGGGAAGATTTCACCTTCCCACAAGGGAAGGCCAGGGAACTTCCTTCAGA	1	D1	TTTTAAAGAAGATCTGGCCTTCCCACAA	GGGGAGGCCAAAGAACTTCCTCCAGA	0.2		--{-A---(---gg------)---T-}---	4.07519e-05	HIV Ribosomal frameshift signal
AAAATTGCACTAAAAGACAGGCTAATT	AAAATTGCACTAAAAGACAGGCTAATTTTTTAAAGAAGATCTGGCCTTCCCACAAGGGGAGGCCAAAGAACTTCCTCCAGA	AAAATTGCACTAAAAGACAGGCTAATTTTTTAGTGAAGATCTGGCCTTCCCCCAAGGGAAGGCTAGGGAACTTCCTTCCGA	1	D1	TTTTAAAGAAGATCTGGCCTTCCCACAA	GGGGAGGCCAAAGAACTTCCTCCAGA	0.2		--{-A---(-t-gg------)---T-}c--	4.07519e-05	HIV Ribosomal frameshift signal
CTTAATACTGACGCTCTCGCACCCATC	CTTAATACTGACGCTCTCGCACCCATCTCTCTCCTTCTAGCCTCCGCTAGTCAAAAATTTTGGCGTACTCACCGGTCGCCT	CTTAATACTGACGCTCTCGCACCCATCTCTCTCCTTCTAGCCTCCGCTAGTCAAAAAATTGGCGTACTCACCGGTCGCCTC	19	D1	TCTCTCCTTCTAGCCTCCGCTAGTCAAA	AATTTTGGCGTACTCACCGGTCGCCT	0.633333	---------{-----(----)-----}-----		0.000172438	HIV-1 stem-loop 3 Psi packaging signal
CTTAATACTGACGCTCTCGCACCCATC	CTTAATACTGACGCTCTCGCACCCATCTCTCTCCTTCTAGCCTCCGCTAGTCAAAAATTTTGGCGTACTCACCGGTCGCCT	CTTAATACTGACGCTCTCGCACCCATCTCTCTCCTTCTAGCCTCCGCTAGTCAAAAAAATATGGCGTACTCACCGGTCGCC	7	D1	TCTCTCCTTCTAGCCTCCGCTAGTCAAA	AATTTTGGCGTACTCACCGGTCGCCT	0.233333	---------{-----(----)-----}-----		0.000172438	HIV-1 stem-loop 3 Psi packaging signal
CTTAATACTGACGCTCTCGCACCCATC	CTTAATACTGACGCTCTCGCACCCATCTCTCTCCTTCTAGCCTCCGCTAGTCAAAAATTTTGGCGTACTCACCGGTCGCCT	CTTAATACTGACGCTCTCGCACCCATCTCTCTCCTTCTAGCCTCCGCTAGTCAAAAATTTTTGGCGTACTCACCGGTCGCC	4	D1	TCTCTCCTTCTAGCCTCCGCTAGTCAAA	AATTTTGGCGTACTCACCGGTCGCCT	0.133333	---------{-----(----)-----}-----		0.000172438	HIV-1 stem-loop 3 Psi packaging signal
ATAGAACCTACACCTGTCAACATAATT	ATAGAACCTACACCTGTCAACATAATTAAAAAAAATCTGTTAACTCAGATTAGTTGCACTTTAAATTTTCCCATTAGTCCT	ATAGAACCTACACCTGTCAACATAATTGGAAGAAATCTGTTGACTCAGATTGGTTGCACTTTAAATTTTCCCATTAGTCCT	3	D1	AAAAAAAATCTGTTAACTCAGATTAGTT	GCACTTTAAATTTTCCCATTAGTCCT	0.6	gg--g-{------(--g---)------}g---		0.0173982	HIV pol-1 stem loop
ATAGAACCTACACCTGTCAACATAATT	ATAGAACCTACACCTGTCAACATAATTAAAAAAAATCTGTTAACTCAGATTAGTTGCACTTTAAATTTTCCCATTAGTCCT	ATAGAACCTACACCTGTCAACATAATTGGAAGAAATCTGTTGACTCAGATTGGTTGCACTTTAAATTTTCACATTCTGTCT	1	D1	AAAAAAAATCTGTTAACTCAGATTAGTT	GCACTTTAAATTTTCCCATTAGTCCT	0.2	gg--g-{------(--g---)------}g---		0.0173982	HIV pol-1 stem loop
ATAGAACCTACACCTGTCAACATAATT	ATAGAACCTACACCTGTCAACATAATTAAAAAAAATCTGTTAACTCAGATTAGTTGCACTTTAAATTTTCCCATTAGTCCT	ATAGAACCTACACCTGTCAACATAATTGGAAGAAATCTGTTGACTCAGATTGGTTGCACTTTACACTTTCCCCTTAGTCCT	1	D1	AAAAAAAATCTGTTAACTCAGATTAGTT	GCACTTTAAATTTTCCCATTAGTCCT	0.2	gg--g-{------(--g---)------}g---		0.0173982	HIV pol-1 stem loop
GATGAAGCGCGCACGGCAAGAGGCGAG	GATGAAGCGCGCACGGCAAGAGGCGAGGGGAGGCGACCGGTGAGTACGCCAAAATTTTTGACTAGCGGAGGCTAGAAGGAG	GATGAAGCGCGCACGGCAAGAGGCGAGGGGAGGCGACCGGTGAGTACGCCAATTTTTTGACTAGCGGAGGCTAGAAGGAGA	2	D1	GGGAGGCGACCGGTGAGTACGCCAAAAT	TTTTGACTAGCGGAGGCTAGAAGGAG	0.5		---gac{TagcG(-ag-)CtagA}-g-aga	0.0173982	HIV-1 stem-loop 3 Psi packaging signal
GATGAAGCGCGCACGGCAAGAGGCGAG	GATGAAGCGCGCACGGCAAGAGGCGAGGGGAGGCGACCGGTGAGTACGCCAAAATTTTTGACTAGCGGAGGCTAGAAGGAG	GATGAAGCGCGCACGGCAAGAGGCGAGGGGAGGCGACCGGTGAGAGCGCCATATTTTTTGACTAGCGGAGGCTAGAAGGAG	1	D1	GGGAGGCGACCGGTGAGTACGCCAAAAT	TTTTGACTAGCGGAGGCTAGAAGGAG	0.25		------{-----(----)-----}------	0.0173982	HIV-1 stem-loop 3 Psi packaging signal
GATGAAGCGCGCACGGCAAGAGGCGAG	GATGAAGCGCGCACGGCAAGAGGCGAGGGGAGGCGACCGGTGAGTACGCCAAAATTTTTGACTAGCGGAGGCTAGAAGGAG	GATGAAGCGCGCACGGCAAGAGGCGAGGGGAGGCGACCGGTGAGTACGCCAATTTTTGACTAGCGGAGGCTAGAAGGAGAG	1	D1	GGGAGGCGACCGGTGAGTACGCCAAAAT	TTTTGACTAGCGGAGGCTAGAAGGAG	0.25		--gact{agC-g(a-gc)taG-a}gga---	0.0173982	HIV-1 stem-loop 3 Psi packaging signal
GCTGAAGCGCGCACGGCAAGAGGCGAG	GCTGAAGCGCGCACGGCAAGAGGCGAGGGGAGGCGACCGGTGAGTACGCCAAAATTTTTGACTAGCGGAGGCTAGAAGGAG	GCTGAAGCGCGCACGGCAAGAGGCGAGGGGAGGCGACCGGTGAGTACGCCATATTTTTTGACTAGCGGAGGCTAGAAGGAG	230	D1	GGGAGGCGACCGGTGAGTACGCCAAAAT	TTTTGACTAGCGGAGGCTAGAAGGAG	0.457256		------{-----(----)-----}------	0.0173982	HIV-1 stem-loop 3 Psi packaging signal
GCTGAAGCGCGCACGGCAAGAGGCGAG	GCTGAAGCGCGCACGGCAAGAGGCGAGGGGAGGCGACCGGTGAGTACGCCAAAATTTTTGACTAGCGGAGGCTAGAAGGAG	GCTGAAGCGCGCACGGCAAGAGGCGAGGGGAGGCGACCGGTGAGTACGCCAATTTTTTGACTAGCGGAGGCTAGAAGGAGA	227	D1	GGGAGGCGACCGGTGAGTACGCCAAAAT	TTTTGACTAGCGGAGGCTAGAAGGAG	0.451292		---gac{TagcG(-ag-)CtagA}-g-aga	0.0173982	HIV-1 stem-loop 3 Psi packaging signal
GCTGAAGCGCGCACGGCAAGAGGCGAG	GCTGAAGCGCGCACGGCAAGAGGCGAGGGGAGGCGACCGGTGAGTACGCCAAAATTTTTGACTAGCGGAGGCTAGAAGGAG	GCTGAAGCGCGCACGGCAAGAGGCGAGGATTGGGACCAGGAGCTTCACTAGAAGAAATGATGACAGCATGCCAGGGAGTGG	46	D1	GGGAGGCGACCGGTGAGTACGCCAAAAT	TTTTGACTAGCGGAGGCTAGAAGGAG	0.0914513		aa-gat{gacaG(cat-)C-ag-}g--tg-	0.0173982	Human immunodeficiency virus type 1 dimerisation initiation site
GCTTGCTGAAGCGCGCACGGCAAGAGG	GCTTGCTGAAGCGCGCACGGCAAGAGGCGAGGGGAGGCGACCGGTGAGTACGCCAAAATTTTTGACTAGCGGAGGCTAGAA	GCTTGCTGAAGCGCGCACGGCAAGAGGCGAATGAACAAGATCTATTGGCATTAGATAAATGGGACAGTTTGTGGAATTGGT	89	D1	CGAGGGGAGGCGACCGGTGAGTACGCCA	AAATTTTTGACTAGCGGAGGCTAGAA	0.412037		t--a-gggac{agtTT(-tg-)AA-t-}gt	0.0173982	Human immunodeficiency virus type 1 dimerisation initiation site
GCTTGCTGAAGCGCGCACGGCAAGAGG	GCTTGCTGAAGCGCGCACGGCAAGAGGCGAGGGGAGGCGACCGGTGAGTACGCCAAAATTTTTGACTAGCGGAGGCTAGAA	GCTTGCTGAAGCGCGCACGGCAAGAGGCGAGGGGAGGCGACCGGTGAGTACGCCAATTTTTGACTAGCAGAGGCTAGAAGG	67	D1	CGAGGGGAGGCGACCGGTGAGTACGCCA	AAATTTTTGACTAGCGGAGGCTAGAA	0.310185		-tt---gact{agCag(a-gc)taG-a}gg	0.0173982	Human immunodeficiency virus type 1 dimerisation initiation site
GCTTGCTGAAGCGCGCACGGCAAGAGG	GCTTGCTGAAGCGCGCACGGCAAGAGGCGAGGGGAGGCGACCGGTGAGTACGCCAAAATTTTTGACTAGCGGAGGCTAGAA	GCTTGCTGAAGCGCGCACGGCAAGAGGCGAGGGGAGGCGACCGGTGAGTACGCCAAATTTTTGACTAGCGGAGGCTAGAAG	60	D1	CGAGGGGAGGCGACCGGTGAGTACGCCA	AAATTTTTGACTAGCGGAGGCTAGAA	0.277778		--t----gac{TagcG(-ag-)CtagA}-g	0.0173982	Human immunodeficiency virus type 1 dimerisation initiation site
GTCGCCTCCCCTCGCCTCTTGCCGTGC	GTCGCCTCCCCTCGCCTCTTGCCGTGCGCGCTTCAGCAAGCCGAGTCCTGCGTCGAGAGAGCTCCTCTGGTTTCCCTTTCG	GTCGCCTCCCCTCGCCTCTTGCCGTGCGCGCTTCAGCAAGCCGAGTCCTGCGTCGAGAGAGCTCCTCTGGCTGTCTCTTAT	16	D3	GCGCTTCAGCAAGCGGTTTCCCTTTCG	CGAGTCCTGCGTCGAGAGAGCTCCTCT	0.380952	-{-----(----)-----}-c-gt-tc--at		0.0173982	Human immunodeficiency virus type 1 dimerisation initiation site
GTCGCCTCCCCTCGCCTCTTGCCGTGC	GTCGCCTCCCCTCGCCTCTTGCCGTGCGCGCTTCAGCAAGCCGAGTCCTGCGTCGAGAGAGCTCCTCTGGTTTCCCTTTCG	GTCGCCTCCCCTCGCCTCTTGCCGTGCGCGCTTCAGCAAGCCGAGTCCTGCGTCGAGAGAGCTCCTCTGGTTCTGTCTCTT	16	D3	GCGCTTCAGCAAGCGGTTTCCCTTTCG	CGAGTCCTGCGTCGAGAGAGCTCCTCT	0.380952	-{-----(----)-----}---ctgtc-ctt		0.0173982	Human immunodeficiency virus type 1 dimerisation initiation site
GTCGCCTCCCCTCGCCTCTTGCCGTGC	GTCGCCTCCCCTCGCCTCTTGCCGTGCGCGCTTCAGCAAGCCGAGTCCTGCGTCGAGAGAGCTCCTCTGGTTTCCCTTTCG	GTCGCCTCCCCTCGCCTCTTGCCGTGCGCGCTTCAGCAAGCCGAGTCCTGCGTCGAGAGAGCTCCTCTGGTTTCCCTCTGT	10	D3	GCGCTTCAGCAAGCGGTTTCCCTTTCG	CGAGTCCTGCGTCGAGAGAGCTCCTCT	0.238095	-{-----(----)-----}--------c-gt		0.0173982	Human immunodeficiency virus type 1 dimerisation initiation site
AACTAATCTGAGTCAACAGATTTCTTC	AACTAATCTGAGTCAACAGATTTCTTCCAATTATGTTGACAGGTGTAGGTCCTATTAATACTGTACCTATAGCTTTATGTC	AACTAATCTGAGTCAACAGATTTCTTCCAATTATGTTGACAGGTGTAGGTCCTATTAATACTGTACCTATGGCTCTATGTC	14	D2	CAATTATGTTGACATAATACTGTACCT	GGTGTAGGTCCTATATAGCTTTATGTC	0.5	--{-------(--)-------}---------		0.0245716	HIV pol-1 stem loop
AACTAATCTGAGTCAACAGATTTCTTC	AACTAATCTGAGTCAACAGATTTCTTCCAATTATGTTGACAGGTGTAGGTCCTATTAATACTGTACCTATAGCTTTATGTC	AACTAATCTGAGTCAACAGATTTCTTCTAATTATGTTGACAGGCGTAGGTCTTATTAATACTGTACCTATAGCTTTATGTC	8	D2	CAATTATGTTGACATAATACTGTACCT	GGTGTAGGTCCTATATAGCTTTATGTC	0.285714	t-{-------(--)-------}---------		0.0245716	HIV pol-1 stem loop
AACTAATCTGAGTCAACAGATTTCTTC	AACTAATCTGAGTCAACAGATTTCTTCCAATTATGTTGACAGGTGTAGGTCCTATTAATACTGTACCTATAGCTTTATGTC	AACTAATCTGAGTCAACAGATTTCTTCTAATTATGTTGACAGGTGTAGGTCTTATTAATACTGTACTTATAGCTCTATGTC	3	D2	CAATTATGTTGACATAATACTGTACCT	GGTGTAGGTCCTATATAGCTTTATGTC	0.107143	t-{-------(--)-------}-------t-		0.0245716	HIV pol-1 stem loop
AACTAATCTGAGTCAACAGATTTCTTC	AACTAATCTGAGTCAACAGATTTCTTCCAATTATGTTGACAGGTGTAGGTCCTATTAATACTGTACCTATAGCTTTATGTC	AACTAATCTGAGTCAACAGATTTCTTCTAATTATGTTGACAGGTGTAGGTCTTATTAATACTGTACTTATGGCTTTATGTC	3	D2	CAATTATGTTGACATAATACTGTACCT	GGTGTAGGTCCTATATAGCTTTATGTC	0.107143	t-{-------(--)-------}-------t-		0.0245716	HIV pol-1 stem loop
TTGCCGAAGCGCGCACGGCAAGAGGCG	TTGCCGAAGCGCGCACGGCAAGAGGCGAGGGGAGGCGACCGGTGAGTACGCCAAAATTTTTGACTAGCGGAGGCTAGAAGG	TTGCCGAAGCGCGCACGGCAAGAGGCGAATGAACAAGATCTATTGGCATTAGATAAATGGGACAGTTTGTGGAATTGGTTT	21	D1	AGGGGAGGCGACCGGTGAGTACGCCAAA	ATTTTTGACTAGCGGAGGCTAGAAGG	0.538462		-a-gggac{agtTT(-tg-)AA-t-}gttt	0.0245716	Human immunodeficiency virus type 1 dimerisation initiation site
TTGCCGAAGCGCGCACGGCAAGAGGCG	TTGCCGAAGCGCGCACGGCAAGAGGCGAGGGGAGGCGACCGGTGAGTACGCCAAAATTTTTGACTAGCGGAGGCTAGAAGG	TTGCCGAAGCGCGCACGGCAAGAGGCGAGGGGAGGCGACCGGTGAGTACGCCAAATTTTTGACTAGCGGAGGCTAGAAGGA	11	D1	AGGGGAGGCGACCGGTGAGTACGCCAAA	ATTTTTGACTAGCGGAGGCTAGAAGG	0.282051		t----gac{TagcG(-ag-)CtagA}-g-a	0.0245716	HIV-1 stem-loop 3 Psi packaging signal
TTGCCGAAGCGCGCACGGCAAGAGGCG	TTGCCGAAGCGCGCACGGCAAGAGGCGAGGGGAGGCGACCGGTGAGTACGCCAAAATTTTTGACTAGCGGAGGCTAGAAGG	TTGCCGAAGCGCGCACGGCAAGAGGCGAGGATTGGGACCAGGAGCTTCACTAGAAGAAATGATGACAGCATGCCAGGGAGT	7	D1	AGGGGAGGCGACCGGTGAGTACGCCAAA	ATTTTTGACTAGCGGAGGCTAGAAGG	0.179487		gaaa-gat{gacaG(cat-)C-ag-}g--t	0.0245716	Human immunodeficiency virus type 1 dimerisation initiation site
TTGAAGCGCGCACGGCAAGAGGCGAGG	TTGAAGCGCGCACGGCAAGAGGCGAGGGGAGGCGACCGGTGAGTACGCCATATTTTTTGACTAGCGGAGGCTAGAAGGAGA	TTGAAGCGCGCACGGCAAGAGGCGAGGGGAGGCGACCGGTGAGTACGCCAATTTTTTGACTAGCGGAGGCTAGAAGGAGAG	3	D1	GGAGGCGACCGGTGAGTACGCCATATTT	TTTGACTAGCGGAGGCTAGAAGGAGA	0.375		--gac{TagcG(-ag-)CtagA}-g-agag	0.0291383	HIV-1 stem-loop 3 Psi packaging signal
TTGAAGCGCGCACGGCAAGAGGCGAGG	TTGAAGCGCGCACGGCAAGAGGCGAGGGGAGGCGACCGGTGAGTACGCCATATTTTTTGACTAGCGGAGGCTAGAAGGAGA	TTGAAGCGCGCACGGCAAGAGGCGAGGGGAGGCGACCGGTGAGTACGCCAAAATTTTTTGACTCGCGGAGGCTAGAAGGAG	1	D1	GGAGGCGACCGGTGAGTACGCCATATTT	TTTGACTAGCGGAGGCTAGAAGGAGA	0.125		---tg{actCg(c-ga)-Gcta}g-a-gag	0.0291383	HIV-1 stem-loop 3 Psi packaging signal
TTGAAGCGCGCACGGCAAGAGGCGAGG	TTGAAGCGCGCACGGCAAGAGGCGAGGGGAGGCGACCGGTGAGTACGCCATATTTTTTGACTAGCGGAGGCTAGAAGGAGA	TTGAAGCGCGCACGGCAAGAGGCGAGGGGAGGCGACCGGTGAGTACGCCAATTCTTGACTAGCGGAGGCTAGAAGGAGAGT	1	D1	GGAGGCGACCGGTGAGTACGCCATATTT	TTTGACTAGCGGAGGCTAGAAGGAGA	0.125		-gact{agC-g(a-gc)taG-a}gga---t	0.0291383	HIV-1 stem-loop 3 Psi packaging signal
TTGAAGCGCGCACGGCAAGAGGCGAGG	TTGAAGCGCGCACGGCAAGAGGCGAGGGGAGGCGACCGGTGAGTACGCCATATTTTTTGACTAGCGGAGGCTAGAAGGAGA	TTGAAGCGCGCACGGCAAGAGGCGAGGGGAGGCGACCGGTGAGTACGCCATATTTTTTTGACTAGCGGAGTCTAGACGGAG	1	D1	GGAGGCGACCGGTGAGTACGCCATATTT	TTTGACTAGCGGAGGCTAGAAGGAGA	0.125		---tg{actAg(c-ga)-Tcta}g-c-gag	0.0291383	Human immunodeficiency virus type 1 major splice donor
TTGAAGCGCGCACGGCAAGAGGCGAGG	TTGAAGCGCGCACGGCAAGAGGCGAGGGGAGGCGACCGGTGAGTACGCCATATTTTTTGACTAGCGGAGGCTAGAAGGAGA	TTGAAGCGCGCACGGCAAGAGGCGAGGGGAGGCGACCTGTGCGTACGCCATGTTTTTTTGCCTTGCGGAGGCTAGAAGGAT	1	D1	GGAGGCGACCGGTGAGTACGCCATATTT	TTTGACTAGCGGAGGCTAGAAGGAGA	0.125		---tg{-cttg(c-ga)-gcta}g-a-gat	0.0291383
TTGAAGCGCGCACGGCAAGAGGCGAGG	TTGAAGCGCGCACGGCAAGAGGCGAGGGGAGGCGACCGGTGAGTACGCCATATTTTTTGACTAGCGGAGGCTAGAAGGAGA	TTGAAGCGCGCACGGCAAGAGGCGAGGGGAGGCGACTGGCGAGTCCGCCAATATTTTCGACTTGCTGAGGCTAGAAGGAGA	1	D1	GGAGGCGACCGGTGAGTACGCCATATTT	TTTGACTAGCGGAGGCTAGAAGGAGA	0.125		--c--{--t--(t---)-----}-------	0.0291383
GCTTGTTGAAGCGCGCACGGCAAGAGG	GCTTGTTGAAGCGCGCACGGCAAGAGGCGAGGGGAGGCGACCGGTGAGTACGCCAAAATTTTTTGACTAGCGGAGGCTAGA	GCTTGTTGAAGCGCGCACGGCAAGAGGCGAGGGGAGGCGACCGGTGAGTACGCCAAAATTTTTGACTAGCGGAGGCTAGAA	2	D1	CGAGGGGAGGCGACCGGTGAGTACGCCA	AAATTTTTTGACTAGCGGAGGCTAGA	0.5		--------gac{TagcG(-ag-)CtagA}-	0.029635	Human immunodeficiency virus type 1 dimerisation initiation site
GCTTGTTGAAGCGCGCACGGCAAGAGG	GCTTGTTGAAGCGCGCACGGCAAGAGGCGAGGGGAGGCGACCGGTGAGTACGCCAAAATTTTTTGACTAGCGGAGGCTAGA	GCTTGTTGAAGCGCGCACGGCAAGAGGCGAGGGGAGGCGACCGGTGAGTACGCCAAATTTTTGACTAGCAGAGGCTAGAAG	1	D1	CGAGGGGAGGCGACCGGTGAGTACGCCA	AAATTTTTTGACTAGCGGAGGCTAGA	0.25		--t----gact{agCag(a-gc)taG-a}g	0.029635	Human immunodeficiency virus type 1 dimerisation initiation site
GCTTGTTGAAGCGCGCACGGCAAGAGG	GCTTGTTGAAGCGCGCACGGCAAGAGGCGAGGGGAGGCGACCGGTGAGTACGCCAAAATTTTTTGACTAGCGGAGGCTAGA	GCTTGTTGAAGCGCGCACGGCAAGAGGCGAGGGGAGGCGACCGGTGAGTACGCCAATTTTTGACTAGCAGAGGCTAGAAGG	1	D1	CGAGGGGAGGCGACCGGTGAGTACGCCA	AAATTTTTTGACTAGCGGAGGCTAGA	0.25		-tt---gact-{gc--a(--ct)aga--}g	0.029635	Human immunodeficiency virus type 1 dimerisation initiation site
AGGCGACCGGTGAGTACGCCAAATTTT	AGGCGACCGGTGAGTACGCCAAATTTTTTGACTAGCGGAGGCTAGAAGGAGAGAGATGGGTGCGAGAGCGTCAGTATTAAG	AGGCGACCGGTGAGTACGCCAAATTTTTGACTAGCGGAGGCTAGAAGGAGAGAGATGGGTGCGAGAGCGTCAGTATTAAGC	2	D1	TTGACTAGCGGAGGCTAGAAGGAGAGAG	ATGGGTGCGAGAGCGTCAGTATTAAG	0.4	-gac{TagcG(-ag-)CtagA}-g-agagaga		0.0320121	HIV-1 stem-loop 3 Psi packaging signal
AGGCGACCGGTGAGTACGCCAAATTTT	AGGCGACCGGTGAGTACGCCAAATTTTTTGACTAGCGGAGGCTAGAAGGAGAGAGATGGGTGCGAGAGCGTCAGTATTAAG	AGGCGACCGGTGAGTACGCCAAATTTTTTGACTAGCGGAGGCTAGAAGGAGAGAGATAAGTGCAAGAGCGTCAGTATTAAG	2	D1	TTGACTAGCGGAGGCTAGAAGGAGAGAG	ATGGGTGCGAGAGCGTCAGTATTAAG	0.4	----{-----(----)-----}----------		0.0320121	HIV-1 stem-loop 3 Psi packaging signal
AGGCGACCGGTGAGTACGCCAAATTTT	AGGCGACCGGTGAGTACGCCAAATTTTTTGACTAGCGGAGGCTAGAAGGAGAGAGATGGGTGCGAGAGCGTCAGTATTAAG	AGGCGACCGGTGAGTACGCCAAATTTTTTACTAGCGGATGCTCGAAGGTGAGAGATGGGTGCGAGAGCGTCAGTATTAAGC	1	D1	TTGACTAGCGGAGGCTAGAAGGAGAGAG	ATGGGTGCGAGAGCGTCAGTATTAAG	0.2	--ac{TaGcG(-at-)CtCgA}-g-tgagaga		0.0320121	HIV-1 stem-loop 4 packaging signal
TACCTATCTAATTCTCCCCCGCTTAAT	TACCTATCTAATTCTCCCCCGCTTAATACTGACGCTCTCGCACCTATCTCTCTCCTTCTAGCCTCCGCTAGTCAAAAAATT	TACCTATCTAATTCTCCCCCGCTTAATACTGACGCTCTCGCACCTATCTTTCTCCTTCTAGCCTCCGCTAGTCAAAAATTT	6	D1	ACTGACGCTCTCGCACCTATCTCTCTCC	TTCTAGCCTCCGCTAGTCAAAAAATT	0.75		--{-----(----)-----}-------t--	0.0372482	HIV-1 stem-loop 3 Psi packaging signal
TACCTATCTAATTCTCCCCCGCTTAAT	TACCTATCTAATTCTCCCCCGCTTAATACTGACGCTCTCGCACCTATCTCTCTCCTTCTAGCCTCCGCTAGTCAAAAAATT	TACCTATCTAATTCTCCCCCGCTTAATACTGACGCTCTCGCACCTATCTCTCTCCGTCTACCCTCCGCTAGGCAAATATTT	1	D1	ACTGACGCTCTCGCACCTATCTCTCTCC	TTCTAGCCTCCGCTAGTCAAAAAATT	0.125		g-{---c-(----)-----}g----t-t--	0.0372482	HIV-1 stem-loop 4 packaging signal
TACCTATCTAATTCTCCCCCGCTTAAT	TACCTATCTAATTCTCCCCCGCTTAATACTGACGCTCTCGCACCTATCTCTCTCCTTCTAGCCTCCGCTAGTCAAAAAATT	TACCTATCTAATTCTCCCCCGCTTAATACTTACTCTCTCGCACTTCTCCCTCTACTTCTAGCCTCCGCTAGTCAAAAATTT	1	D1	ACTGACGCTCTCGCACCTATCTCTCTCC	TTCTAGCCTCCGCTAGTCAAAAAATT	0.125		--{-----(----)-----}-------t--	0.0372482	HIV-1 stem-loop 3 Psi packaging signal
AAAATTTAAAGTGCAACTAATCTGAGT	AAAATTTAAAGTGCAACTAATCTGAGTCAACAGATTCTTTCTAATTATGTTGATAGGTGTAGGTCTTATTAATACTGTACT	AAAATTTAAAGTGCAACTAATCTGAGTCAACAGATTTCTTCCAATTATGTTGACAGGTGTAGGTCCTATTAATACTGTACC	3	D1	CAACAGATTCTTTCTAATTATGTTGATA	GGTGTAGGTCTTATTAATACTGTACT	0.5	{-----(----tc---c-----)-----}-c-		0.0495828	HIV pol-1 stem loop
AAAATTTAAAGTGCAACTAATCTGAGT	AAAATTTAAAGTGCAACTAATCTGAGTCAACAGATTCTTTCTAATTATGTTGATAGGTGTAGGTCTTATTAATACTGTACT	AAAATTTAAAGTGCAACTAATCTGAGTCAACAGATTTCTTCTAATTATGTTGACAGGCGTAGGTCTTATTAATACTGTACC	1	D1	CAACAGATTCTTTCTAATTATGTTGATA	GGTGTAGGTCTTATTAATACTGTACT	0.166667	{-----(----tc---------)-----}-c-		0.0495828	HIV pol-1 stem loop
AAAATTTAAAGTGCAACTAATCTGAGT	AAAATTTAAAGTGCAACTAATCTGAGTCAACAGATTCTTTCTAATTATGTTGATAGGTGTAGGTCTTATTAATACTGTACT	AAAATTTAAAGTGCAACTAATCTGAGTCAACAGATTTCTTCTAATTATGTTGACAGGTGTAGGTCTTATTAATACTGTACT	1	D1	CAACAGATTCTTTCTAATTATGTTGATA	GGTGTAGGTCTTATTAATACTGTACT	0.166667	{-----(----tc---------)-----}-c-		0.0495828	HIV pol-1 stem loop
AAAATTTAAAGTGCAACTAATCTGAGT	AAAATTTAAAGTGCAACTAATCTGAGTCAACAGATTCTTTCTAATTATGTTGATAGGTGTAGGTCTTATTAATACTGTACT	AAAATTTAAAGTGCAACTAATCTGAGTCTACAGCTTTCTTCTAATTATGTTGACAGGCGTAGGTCTTATTAATACTGTACC	1	D1	CAACAGATTCTTTCTAATTATGTTGATA	GGTGTAGGTCTTATTAATACTGTACT	0.166667	{-t---(-c--tc---------)-----}-c-		0.0495828	HIV pol-1 stem loop

## Sheet: Suppl_Table_4
anchor	base_compactor	compactor	support	segment_index	weight	strucNotation_1	strucNotation_2	anchor_p_BH	Rfam_match
Blank on purpose. No Rfam match was detected in HIV Host 1532.

## Sheet: Suppl_Table_5
anchor	base_compactor	compactor	support	segment_index	base_S1	base_S2	weight	strucNotation_1	strucNotation_2	anchor_p_BH	Rfam_match
GTCGCCGCCCCTCGCCTCTTGCTGTGC	GTCGCCGCCCCTCGCCTCTTGCTGTGCGCGCTTCAGCAAGCCGAGTCCTGCGTCGAGAGAGCTCCTCTGGTTTCCCTCTGT	GTCGCCGCCCCTCGCCTCTTGCTGTGCGCGCTTCAGCAAGCCGAGTCCTGCGTCGAGAGAGCTCCTCTGGTTCTACTTTCG	4	D3	GCGCTTCAGCAAGCGGTTTCCCTCTGT	CGAGTCCTGCGTCGAGAGAGCTCCTCT	0.285714	-{-----(----)-----}---cta--t-cg		0.0382168	Human immunodeficiency virus type 1 dimerisation initiation site
GTCGCCGCCCCTCGCCTCTTGCTGTGC	GTCGCCGCCCCTCGCCTCTTGCTGTGCGCGCTTCAGCAAGCCGAGTCCTGCGTCGAGAGAGCTCCTCTGGTTTCCCTCTGT	GTCGCCGCCCCTCGCCTCTTGCTGTGCGCGCTTCAGCAAGCCGAGTCCTGCGTCGAGAGAGCTCCTCTGGTTTCCCTTTCG	3	D3	GCGCTTCAGCAAGCGGTTTCCCTCTGT	CGAGTCCTGCGTCGAGAGAGCTCCTCT	0.214286	-{-----(----)-----}--------t-cg		0.0382168	Human immunodeficiency virus type 1 dimerisation initiation site
GTCGCCGCCCCTCGCCTCTTGCTGTGC	GTCGCCGCCCCTCGCCTCTTGCTGTGCGCGCTTCAGCAAGCCGAGTCCTGCGTCGAGAGAGCTCCTCTGGTTTCCCTCTGT	GTCGCCGCCCCTCGCCTCTTGCTGTGCGCGCTTCAGCAAGCCGAGTCCTGCGTCGAGAGAGCTCCTCTGGTTTCCCCTGTC	2	D3	GCGCTTCAGCAAGCGGTTTCCCTCTGT	CGAGTCCTGCGTCGAGAGAGCTCCTCT	0.142857	-{-----(----)-----}-------ctgtc		0.0382168	Human immunodeficiency virus type 1 dimerisation initiation site
GTCGCCGCCCCTCGCCTCTTGCTGTGC	GTCGCCGCCCCTCGCCTCTTGCTGTGCGCGCTTCAGCAAGCCGAGTCCTGCGTCGAGAGAGCTCCTCTGGTTTCCCTCTGT	GTCGCCGCCCCTCGCCTCTTGCTGTGCGCGCTTCAGCAAGCCGAGTCCTGCGTCGAGAGAGCTCCTCTGGCTTCTGTCTCT	1	D3	GCGCTTCAGCAAGCGGTTTCCCTCTGT	CGAGTCCTGCGTCGAGAGAGCTCCTCT	0.0714286	-{-----(----)-----}-c---tg---c-		0.0382168	Human immunodeficiency virus type 1 dimerisation initiation site
GTCGCCGCCCCTCGCCTCTTGCTGTGC	GTCGCCGCCCCTCGCCTCTTGCTGTGCGCGCTTCAGCAAGCCGAGTCCTGCGTCGAGAGAGCTCCTCTGGTTTCCCTCTGT	GTCGCCGCCCCTCGCCTCTTGCTGTGCGCGCTTCAGCAAGCCGAGTCCTGCGTCGAGAGAGCTCCTCTGGTTCCTGTCTCT	1	D3	GCGCTTCAGCAAGCGGTTTCCCTCTGT	CGAGTCCTGCGTCGAGAGAGCTCCTCT	0.0714286	-{-----(----)-----}---c-tg---c-		0.0382168	Human immunodeficiency virus type 1 dimerisation initiation site
GTCGCCGCCCCTCGCCTCTTGCTGTGC	GTCGCCGCCCCTCGCCTCTTGCTGTGCGCGCTTCAGCAAGCCGAGTCCTGCGTCGAGAGAGCTCCTCTGGTTTCCCTCTGT	GTCGCCGCCCCTCGCCTCTTGCTGTGCGCGCTTCAGCAAGCCGAGTCCTGCGTCGAGAGAGCTCCTCTGTTTCCCTTTCTG	1	D3	GCGCTTCAGCAAGCGGTTTCCCTCTGT	CGAGTCCTGCGTCGAGAGAGCTCCTCT	0.0714286	-{-----(----)-----}t--c--t-tctg		0.0382168	Human immunodeficiency virus type 1 dimerisation initiation site
GTCGCCGCCCCTCGCCTCTTGCTGTGC	GTCGCCGCCCCTCGCCTCTTGCTGTGCGCGCTTCAGCAAGCCGAGTCCTGCGTCGAGAGAGCTCCTCTGGTTTCCCTCTGT	GTCGCCGCCCCTCGCCTCTTGCTGTGCGCGCTTCAGCAAGCCGAGTCCTGCGTCGAGAGAGCTGCACTGGTTTCCCTTTCT	1	D3	GCGCTTCAGCAAGCGGTTTCCCTCTGT	CGAGTCCTGCGTCGAGAGAGCTCCTCT	0.0714286	-{-----(----)-----}--------t-c-		0.0382168	Human immunodeficiency virus type 1 dimerisation initiation site
GTCGCCGCCCCTCGCCTCTTGCTGTGC	GTCGCCGCCCCTCGCCTCTTGCTGTGCGCGCTTCAGCAAGCCGAGTCCTGCGTCGAGAGAGCTCCTCTGGTTTCCCTCTGT	GTCGCCGCCCCTCGCCTCTTGCTGTGCGCGCTTCAGCAAGCCGAGTCCTGCGTCGAGGGAGCTCCTCTGGTTCTACTCTGT	1	D3	GCGCTTCAGCAAGCGGTTTCCCTCTGT	CGAGTCCTGCGTCGAGAGAGCTCCTCT	0.0714286	-{-----(----)-----}---cta------		0.0382168	Human immunodeficiency virus type 1 dimerisation initiation site

## Sheet: Suppl_Table_6
anchor	base_compactor	compactor	support	segment_index	base_S1	base_S2	weight	strucNotation_1	strucNotation_2	anchor_p_BH	Rfam_match
ATACTGACGCTCTCGCACCTATCTCTC	ATACTGACGCTCTCGCACCTATCTCTCTCCTTCTAGCCTCCGCTAGTCAAAAATTTCAGCGTACTCACCAGTCGCTGCCTT	ATACTGACGCTCTCGCACCTATCTCTCTCCTTCTAGCCTCCGCTAGTCAAAAATTTCAGCGTACTCACTAGTCGCTGCCCC	5	D1	TCCTTCTAGCCTCCGCTAGTCAAAAATT	TCAGCGTACTCACCAGTCGCTGCCTT	0.555556	-----{-----(----)-----}---------	-{-----(-------t---)-----}--cc	0.0215404	HIV-1 stem-loop 3 Psi packaging signal
ATACTGACGCTCTCGCACCTATCTCTC	ATACTGACGCTCTCGCACCTATCTCTCTCCTTCTAGCCTCCGCTAGTCAAAAATTTCAGCGTACTCACCAGTCGCTGCCTT	ATACTGACGCTCTCGCACCTATCTCTCTCCTTCTAGCCCCTGCTAGTCAAAAATTTCAGCGTACTCACTAGTCGCTGCCCT	2	D1	TCCTTCTAGCCTCCGCTAGTCAAAAATT	TCAGCGTACTCACCAGTCGCTGCCTT	0.222222	-----{-----(-c-t)-----}---------	-{-----(-------t---)-----}--c-	0.0215404	HIV-1 stem-loop 4 packaging signal
ATACTGACGCTCTCGCACCTATCTCTC	ATACTGACGCTCTCGCACCTATCTCTCTCCTTCTAGCCTCCGCTAGTCAAAAATTTCAGCGTACTCACCAGTCGCTGCCTT	ATACTGACGCTCTCGCACCTATCTCTCTCCTTCTAGCCTCTGCTAGTCAAAATTTTCAGCGTACTCACCAGTCGCTGCCCC	2	D1	TCCTTCTAGCCTCCGCTAGTCAAAAATT	TCAGCGTACTCACCAGTCGCTGCCTT	0.222222	-----{-----(---t)-----}------t--	-{-----(-----------)-----}--cc	0.0215404	HIV-1 stem-loop 3 Psi packaging signal
CCCCCGCTTAATACTGACGCTCTCGCA	CCCCCGCTTAATACTGACGCTCTCGCACCCATCTCTCTCCTTCTAGCCTCTGCTAGTCAAAATTTTCAGCGTACTCACCAG	CCCCCGCTTAATACTGACGCTCTCGCACCCATCTCTCTCCTTCTAGCCTCCGCTAGTCAAAAAGTTCAGCGTACTCACCAG	2	D3	CCCATCTCTCTCCTGCGTACTCACCAG	TCTAGCCTCTGCTAGTCAAAATTTTCA	0.285714		-{-----(---c)-----}------ag----	0.0218227	HIV-1 stem-loop 3 Psi packaging signal
CCCCCGCTTAATACTGACGCTCTCGCA	CCCCCGCTTAATACTGACGCTCTCGCACCCATCTCTCTCCTTCTAGCCTCTGCTAGTCAAAATTTTCAGCGTACTCACCAG	CCCCCGCTTAATACTGACGCTCTCGCACCCATCTCTCTCCTTCTAGCCTCCGCTAGTCAAAAAGTTCAGCGTCTGTCTCTT	1	D3	CCCATCTCTCTCCTGCGTACTCACCAG	TCTAGCCTCTGCTAGTCAAAATTTTCA	0.142857		-{-----(---c)-----}------ag----	0.0218227	HIV-1 stem-loop 3 Psi packaging signal
CCCCCGCTTAATACTGACGCTCTCGCA	CCCCCGCTTAATACTGACGCTCTCGCACCCATCTCTCTCCTTCTAGCCTCTGCTAGTCAAAATTTTCAGCGTACTCACCAG	CCCCCGCTTAATACTGACGCTCTCGCACCCATCTCTCTCCTTCTAGCCTCCGCTAGTCAAAAAGTTTTTGGCGTACTCACC	1	D3	CCCATCTCTCTCCTGCGTACTCACCAG	TCTAGCCTCTGCTAGTCAAAATTTTCA	0.142857		-{-----(---c)-----}------ag--tt	0.0218227	HIV-1 stem-loop 3 Psi packaging signal
CCCCCGCTTAATACTGACGCTCTCGCA	CCCCCGCTTAATACTGACGCTCTCGCACCCATCTCTCTCCTTCTAGCCTCTGCTAGTCAAAATTTTCAGCGTACTCACCAG	CCCCCGCTTAATACTGACGCTCTCGCACCTATCTCTCTCCTTCTAGCCTCCGCTAGTCAAAAATTTCAGCGTACTCACTAG	1	D3	CCCATCTCTCTCCTGCGTACTCACCAG	TCTAGCCTCTGCTAGTCAAAATTTTCA	0.142857		-{-----(---c)-----}------a-----	0.0218227	HIV-1 stem-loop 3 Psi packaging signal
CCCCCGCTTAATACTGACGCTCTCGCA	CCCCCGCTTAATACTGACGCTCTCGCACCCATCTCTCTCCTTCTAGCCTCTGCTAGTCAAAATTTTCAGCGTACTCACCAG	CCCCCGCTTAATACTGACGCTCTCGCACCTATCTCTCTCCTTCTAGCCTCCGCTAGTCAAAATTTTCAGCCTGTCTCTTAT	1	D3	CCCATCTCTCTCCTGCGTACTCACCAG	TCTAGCCTCTGCTAGTCAAAATTTTCA	0.142857		-{-----(---c)-----}------------	0.0218227	HIV-1 stem-loop 3 Psi packaging signal
CCCCCGCTTAATACTGACGCTCTCGCA	CCCCCGCTTAATACTGACGCTCTCGCACCCATCTCTCTCCTTCTAGCCTCTGCTAGTCAAAATTTTCAGCGTACTCACCAG	CCCCCGCTTAATACTGACGCTCTCGCACTTATCTCTCTCCTTCTAGTCTCTGCTAGTCAAAATTTTCAGCGTACTCACCCT	1	D3	CCCATCTCTCTCCTGCGTACTCACCAG	TCTAGCCTCTGCTAGTCAAAATTTTCA	0.142857		-{----t(----)-----}------------	0.0218227	HIV-1 stem-loop 3 Psi packaging signal
AGGGCAAGCTTTATTGAGGCTTAAGCA	AGGGCAAGCTTTATTGAGGCTTAAGCAGTGGGTTCCCTAGTCAGCCAGAGAGCTCCCAGGCTCAGATCTGGTCTAACCAGA	AGGGCAAGCTTTATTGAGGCTTAAGCAGTGGGTTCCTTAGTCAGCCAGAGAGCTCCTAGGCTTAAATCTGGTCTAACCAGA	13	D2	GTGGGTTCCCTAGTCCAGGCTCAGATC	CAGCCAGAGAGCTCTGGTCTAACCAGA	0.393939		---{------(--)------}----------	0.0333726	Trans-activation response element (TAR)
AGGGCAAGCTTTATTGAGGCTTAAGCA	AGGGCAAGCTTTATTGAGGCTTAAGCAGTGGGTTCCCTAGTCAGCCAGAGAGCTCCCAGGCTCAGATCTGGTCTAACCAGA	AGGGCAAGCTTTATTGAGGCTTAAGCAGTGGGTTTCCTAGTTAGCCAGAGAGCTCCCAGGCTCAGATCTGGTTTAATTAGA	11	D2	GTGGGTTCCCTAGTCCAGGCTCAGATC	CAGCCAGAGAGCTCTGGTCTAACCAGA	0.333333		t--{------(--)------}-t---tt---	0.0333726	Trans-activation response element (TAR)
AGGGCAAGCTTTATTGAGGCTTAAGCA	AGGGCAAGCTTTATTGAGGCTTAAGCAGTGGGTTCCCTAGTCAGCCAGAGAGCTCCCAGGCTCAGATCTGGTCTAACCAGA	AGGGCAAGCTTTATTGAGGCTTAAGCAGTGGGTTCCTTAGTCAGCCAGAGAGCTCTTAGGCTCAGATCTGGTCTAACCAGA	9	D2	GTGGGTTCCCTAGTCCAGGCTCAGATC	CAGCCAGAGAGCTCTGGTCTAACCAGA	0.272727		---{------(--)------}----------	0.0333726	Trans-activation response element (TAR)
CTCTCGCACCTATCTCTCTCCTTCTAG	CTCTCGCACCTATCTCTCTCCTTCTAGCCTCCGCTAGTCAAAAATTTCAGCGTACTCACCAGTCGCTGCCCCTCGCCTCTT	CTCTCGCACCTATCTCTCTCCTTCTAGCCTCCGCTAGTCAAAAATTTCAGCGTACTCACCAGTCGCTGCCTTTCGCCTCTT	10	D3	CCTCCGCTAGTCAACCCCTCGCCTCTT	AAATTTCAGCGTACTCACCAGTCGCTG	0.357143		------{-----(-----------)-----}	0.0360652	HIV-1 stem-loop 3 Psi packaging signal
CTCTCGCACCTATCTCTCTCCTTCTAG	CTCTCGCACCTATCTCTCTCCTTCTAGCCTCCGCTAGTCAAAAATTTCAGCGTACTCACCAGTCGCTGCCCCTCGCCTCTT	CTCTCGCACCTATCTCTCTCCTTCTAGCCCCTGCTAGTCAAAAATTTCAGCGTACTCACTAGTCGCTGCCCTTCGCCTCTT	7	D3	CCTCCGCTAGTCAACCCCTCGCCTCTT	AAATTTCAGCGTACTCACCAGTCGCTG	0.25		------{-----(-------t---)-----}	0.0360652
CTCTCGCACCTATCTCTCTCCTTCTAG	CTCTCGCACCTATCTCTCTCCTTCTAGCCTCCGCTAGTCAAAAATTTCAGCGTACTCACCAGTCGCTGCCCCTCGCCTCTT	CTCTCGCACCTATCTCTCTCCTTCTAGCCTCCGCTAGTCAAAAATTTCAGCGTACTCACTAGTCGCTGCCCTTCGCCTCTT	7	D3	CCTCCGCTAGTCAACCCCTCGCCTCTT	AAATTTCAGCGTACTCACCAGTCGCTG	0.25		------{-----(-------t---)-----}	0.0360652	HIV-1 stem-loop 3 Psi packaging signal
CTCTCGCACCTATCTCTCTCCTTCTAG	CTCTCGCACCTATCTCTCTCCTTCTAGCCTCCGCTAGTCAAAAATTTCAGCGTACTCACCAGTCGCTGCCCCTCGCCTCTT	CTCTCGCACCTATCTCTCTCCTTCTAGCCTCTGCTAGTCAAAATTTTCAGCGTACTCACTAGTCGCTGCCCCTCGCCTCTT	4	D3	CCTCCGCTAGTCAACCCCTCGCCTCTT	AAATTTCAGCGTACTCACCAGTCGCTG	0.142857		--t---{-----(-------t---)-----}	0.0360652	HIV-1 stem-loop 3 Psi packaging signal

## Sheet: Suppl_Table_7
anchor	base_compactor	compactor	support	segment_index	base_S1	base_S2	weight	strucNotation_1	strucNotation_2	anchor_p_BH	Rfam_match
TCCCCCGCTTAATACTGACGCTCTCGC	TCCCCCGCTTAATACTGACGCTCTCGCACCTATCTCTCTCCTTCTAGCCTCTGCTAGTCAAAAATTTTTGGCGTACTCACT	TCCCCCGCTTAATACTGACGCTCTCGCACCTATCTCTCTCCTGCTAGCTTCTGCTAGTCAAAAATTTCAGCGTACTCACTA	4	D3	ACCTATCTCTCTCCTGGCGTACTCACT	TTCTAGCCTCTGCTAGTCAAAAATTTT	0.363636		-g{-----(t---)-----}----------c	4.37946e-05	HIV-1 stem-loop 4 packaging signal
TCCCCCGCTTAATACTGACGCTCTCGC	TCCCCCGCTTAATACTGACGCTCTCGCACCTATCTCTCTCCTTCTAGCCTCTGCTAGTCAAAAATTTTTGGCGTACTCACT	TCCCCCGCTTAATACTGACGCTCTCGCACCTATCTCTCTCCTTCTAGCCTCTGCTAGTCAAAATTTTCAGCGTACTCACCA	4	D3	ACCTATCTCTCTCCTGGCGTACTCACT	TTCTAGCCTCTGCTAGTCAAAAATTTT	0.363636		--{-----(----)-----}------t---c	4.37946e-05	HIV-1 stem-loop 3 Psi packaging signal
TCCCCCGCTTAATACTGACGCTCTCGC	TCCCCCGCTTAATACTGACGCTCTCGCACCTATCTCTCTCCTTCTAGCCTCTGCTAGTCAAAAATTTTTGGCGTACTCACT	TCCCCCGCTTAATACTGACGCTCTCGCACCCATCTCTCTCCTTCTAGCCTCCGCTAGTCAAAAATTTCAGCGTACTCACTA	2	D3	ACCTATCTCTCTCCTGGCGTACTCACT	TTCTAGCCTCTGCTAGTCAAAAATTTT	0.181818		--{-----(---c)-----}----------c	4.37946e-05	HIV-1 stem-loop 3 Psi packaging signal
TCCCCCGCTTAATACTGACGCTCTCGC	TCCCCCGCTTAATACTGACGCTCTCGCACCTATCTCTCTCCTTCTAGCCTCTGCTAGTCAAAAATTTTTGGCGTACTCACT	TCCCCCGCTTAATACTGACGCTCTCGCACCCATCTCTCTCCTTCTAGCCTCCGCTAGTCAAAAAGTTCGGCGTCTGTCTCT	1	D3	ACCTATCTCTCTCCTGGCGTACTCACT	TTCTAGCCTCTGCTAGTCAAAAATTTT	0.0909091		--{-----(---c)-----}-------g--c	4.37946e-05	HIV-1 stem-loop 3 Psi packaging signal
CGACTAGTGAGTACGCCAAAAATTTTG	CGACTAGTGAGTACGCCAAAAATTTTGACTAGCAGAGGCTAGAAAGAGAGAGATAGGTGCAAGAGCGTCAGTATTAAGCGG	CGACTAGTGAGTACGCCAAAAATTTTGACTAGCGGAGGCTAGAAAGAGAGAGATAGGTGCGAGAGCGTCGGTATTAAGCGA	4	D1	ACTAGCAGAGGCTAGAAAGAGAGAGATA	GGTGCAAGAGCGTCAGTATTAAGCGG	0.363636	-{-----(g---)-----}-------------		0.0161877	HIV-1 stem-loop 3 Psi packaging signal
CGACTAGTGAGTACGCCAAAAATTTTG	CGACTAGTGAGTACGCCAAAAATTTTGACTAGCAGAGGCTAGAAAGAGAGAGATAGGTGCAAGAGCGTCAGTATTAAGCGG	CGACTAGTGAGTACGCCAAAAATTTTGACTAGCGGAGGCTAGAAGGAGAGAGATGGGTGCGAGAGCGTCGGTATTAAGCGA	3	D1	ACTAGCAGAGGCTAGAAAGAGAGAGATA	GGTGCAAGAGCGTCAGTATTAAGCGG	0.272727	-{-----(g---)-----}--g---------g		0.0161877	HIV-1 stem-loop 3 Psi packaging signal
CGACTAGTGAGTACGCCAAAAATTTTG	CGACTAGTGAGTACGCCAAAAATTTTGACTAGCAGAGGCTAGAAAGAGAGAGATAGGTGCAAGAGCGTCAGTATTAAGCGG	CGACTAGTGAGTACGCCAAAAATTTTGACTAGCAGAGGCTAGAAGGAAAGAGATAGGTGCGAGAGCGTCAGTATTAAGCAG	2	D1	ACTAGCAGAGGCTAGAAAGAGAGAGATA	GGTGCAAGAGCGTCAGTATTAAGCGG	0.181818	-{-----(----)-----}--g--a-------		0.0161877	HIV-1 stem-loop 3 Psi packaging signal
CGACTAGTGAGTACGCCAAAAATTTTG	CGACTAGTGAGTACGCCAAAAATTTTGACTAGCAGAGGCTAGAAAGAGAGAGATAGGTGCAAGAGCGTCAGTATTAAGCGG	CGACTAGTGAGTACGCCAAAAATTTTGACTAGCGGAGGCTAGAAGGAGAGAGATAGGTGCGAGAGCGTCAGTATTAAGCAG	2	D1	ACTAGCAGAGGCTAGAAAGAGAGAGATA	GGTGCAAGAGCGTCAGTATTAAGCGG	0.181818	-{-----(g---)-----}--g----------		0.0161877	HIV-1 stem-loop 3 Psi packaging signal
CGACTAGTGAGTACGCCAAAAATTTTG	CGACTAGTGAGTACGCCAAAAATTTTGACTAGCAGAGGCTAGAAAGAGAGAGATAGGTGCAAGAGCGTCAGTATTAAGCGG	CGACTAGTGAGTACGCCAAAAATTTTGACTAGCGGAGGCTAGAAAGAGAGAGATAGGTGCGAGAGCGTCGGTATTAAGCGA	4	D2	ACTAGCAGAGGCTAGGTGCAAGAGCGT	GAAAGAGAGAGATACAGTATTAAGCGG	0.363636	-{-----(g---)-----}----g-------		0.0161877	HIV-1 stem-loop 3 Psi packaging signal
CGACTAGTGAGTACGCCAAAAATTTTG	CGACTAGTGAGTACGCCAAAAATTTTGACTAGCAGAGGCTAGAAAGAGAGAGATAGGTGCAAGAGCGTCAGTATTAAGCGG	CGACTAGTGAGTACGCCAAAAATTTTGACTAGCGGAGGCTAGAAGGAGAGAGATGGGTGCGAGAGCGTCGGTATTAAGCGA	3	D2	ACTAGCAGAGGCTAGGTGCAAGAGCGT	GAAAGAGAGAGATACAGTATTAAGCGG	0.272727	-{-----(g---)-----}----g-------		0.0161877	HIV-1 stem-loop 3 Psi packaging signal
CGACTAGTGAGTACGCCAAAAATTTTG	CGACTAGTGAGTACGCCAAAAATTTTGACTAGCAGAGGCTAGAAAGAGAGAGATAGGTGCAAGAGCGTCAGTATTAAGCGG	CGACTAGTGAGTACGCCAAAAATTTTGACTAGCAGAGGCTAGAAGGAAAGAGATAGGTGCGAGAGCGTCAGTATTAAGCAG	2	D2	ACTAGCAGAGGCTAGGTGCAAGAGCGT	GAAAGAGAGAGATACAGTATTAAGCGG	0.181818	-{-----(----)-----}----g-------		0.0161877	HIV-1 stem-loop 3 Psi packaging signal
CGACTAGTGAGTACGCCAAAAATTTTG	CGACTAGTGAGTACGCCAAAAATTTTGACTAGCAGAGGCTAGAAAGAGAGAGATAGGTGCAAGAGCGTCAGTATTAAGCGG	CGACTAGTGAGTACGCCAAAAATTTTGACTAGCGGAGGCTAGAAGGAGAGAGATAGGTGCGAGAGCGTCAGTATTAAGCAG	2	D2	ACTAGCAGAGGCTAGGTGCAAGAGCGT	GAAAGAGAGAGATACAGTATTAAGCGG	0.181818	-{-----(g---)-----}----g-------		0.0161877	HIV-1 stem-loop 3 Psi packaging signal
AGTCGCCGCCTCTCGCCTCTTGCTGTG	AGTCGCCGCCTCTCGCCTCTTGCTGTGCGCGCTTCAGCAAGCCGAGTCCTGCGCCGAGAGAGCTTCTCTGGCTGTCTCTTA	AGTCGCCGCCTCTCGCCTCTTGCTGTGCGCGCTTCAGCAAGCCGAGTCCTGCGCCGAGAGAGCTTCTCTGGTTTCTTTTTC	3	D1	CGCGCTTCAGCAAGCCGAGTCCTGCGCC	GAGAGAGCTTCTCTGGCTGTCTCTTA	0.428571		-{-----(---)-----}--t-tct-t--c	0.0172878	Human immunodeficiency virus type 1 dimerisation initiation site
AGTCGCCGCCTCTCGCCTCTTGCTGTG	AGTCGCCGCCTCTCGCCTCTTGCTGTGCGCGCTTCAGCAAGCCGAGTCCTGCGCCGAGAGAGCTTCTCTGGCTGTCTCTTA	AGTCGCCGCCTCTCGCCTCTTGCTGTGCGCGCTTCAGCAAGCCGAGTCCTGCGCCGAGAGAGCTTCTCTGGTTACTCTCTG	1	D1	CGCGCTTCAGCAAGCCGAGTCCTGCGCC	GAGAGAGCTTCTCTGGCTGTCTCTTA	0.142857		-{-----(---)-----}--t-actctc-g	0.0172878	Human immunodeficiency virus type 1 dimerisation initiation site
AGTCGCCGCCTCTCGCCTCTTGCTGTG	AGTCGCCGCCTCTCGCCTCTTGCTGTGCGCGCTTCAGCAAGCCGAGTCCTGCGCCGAGAGAGCTTCTCTGGCTGTCTCTTA	AGTCGCCGCCTCTCGCCTCTTGCTGTGCGCGCTTCAGCAAGCCGAGTCCTGCGCCGAGAGAGCTTCTCTGGTTCTGTCTCT	1	D1	CGCGCTTCAGCAAGCCGAGTCCTGCGCC	GAGAGAGCTTCTCTGGCTGTCTCTTA	0.142857		-{-----(---)-----}--t-c-g---ct	0.0172878	Human immunodeficiency virus type 1 dimerisation initiation site
AGTCGCCGCCTCTCGCCTCTTGCTGTG	AGTCGCCGCCTCTCGCCTCTTGCTGTGCGCGCTTCAGCAAGCCGAGTCCTGCGCCGAGAGAGCTTCTCTGGCTGTCTCTTA	AGTCGCCGCCTCTCGCCTCTTGCTGTGCGCGCTTCAGCAAGCCGAGTCCTGCGCCGAGAGAGCTTCTCTGGTTTCCCTCTG	1	D1	CGCGCTTCAGCAAGCCGAGTCCTGCGCC	GAGAGAGCTTCTCTGGCTGTCTCTTA	0.142857		-{-----(---)-----}--t-tc-ctc-g	0.0172878	Human immunodeficiency virus type 1 dimerisation initiation site
AGTCGCCGCCTCTCGCCTCTTGCTGTG	AGTCGCCGCCTCTCGCCTCTTGCTGTGCGCGCTTCAGCAAGCCGAGTCCTGCGCCGAGAGAGCTTCTCTGGCTGTCTCTTA	AGTCGCCGCCTCTCGCCTCTTGCTGTGCGCGCTTCAGCAAGCCGAGTCCTGCGCCGAGAGAGCTTCTCTGGTTTCCTGTCT	1	D1	CGCGCTTCAGCAAGCCGAGTCCTGCGCC	GAGAGAGCTTCTCTGGCTGTCTCTTA	0.142857		-{-----(---)-----}--t-tc--g-ct	0.0172878	Human immunodeficiency virus type 1 dimerisation initiation site
AGAGTGTACTAAGAGACAGGCTAATTT	AGAGTGTACTAAGAGACAGGCTAATTTTTTAAAGAAAATCTGGCCTTCCCACAAGGGGAGGCCAAGGAACTTCCCTCAGGG	AGAGTGTACTAAGAGACAGGCTAATTTTTTAAAGAAAATCTGGCCTTCCCACAAGAGGAGGCCAAAGAATTTCCCTCAAGG	6	D3	TTTAAAGAAAATCTACTTCCCTCAGGG	GGCCTTCCCACAAGGGGAGGCCAAGGA	0.315789		{-----(---------a--)-----}--a--	0.0208989	HIV Ribosomal frameshift signal
AGAGTGTACTAAGAGACAGGCTAATTT	AGAGTGTACTAAGAGACAGGCTAATTTTTTAAAGAAAATCTGGCCTTCCCACAAGGGGAGGCCAAGGAACTTCCCTCAGGG	AGAGTGTACTAAGAGACAGGCTAATTTTTTAAGGAAAATCTGGCCTTCCCACAAGGGGAGGCCAAGGAATTTCCCTCAGGG	5	D3	TTTAAAGAAAATCTACTTCCCTCAGGG	GGCCTTCCCACAAGGGGAGGCCAAGGA	0.263158		{-----(------------)-----}-----	0.0208989	HIV Ribosomal frameshift signal
AGAGTGTACTAAGAGACAGGCTAATTT	AGAGTGTACTAAGAGACAGGCTAATTTTTTAAAGAAAATCTGGCCTTCCCACAAGGGGAGGCCAAGGAACTTCCCTCAGGG	AGAGTGTACTAAGAGACAGGCTAATTTTTTAAGGAAAATCTGGCCTTCCCACAAGGGAAGGCCAGAGAATTTCCCTCAGGG	4	D3	TTTAAAGAAAATCTACTTCCCTCAGGG	GGCCTTCCCACAAGGGGAGGCCAAGGA	0.210526		{-----(-----------a)-----}-ga--	0.0208989	HIV Ribosomal frameshift signal
AGAGTGTACTAAGAGACAGGCTAATTT	AGAGTGTACTAAGAGACAGGCTAATTTTTTAAAGAAAATCTGGCCTTCCCACAAGGGGAGGCCAAGGAACTTCCCTCAGGG	AGAGTGTACTAAGAGACAGGCTAATTTTTTAAGGAAAATCTGGCCTTCCCACAAGGGGAGGCCAGGAAATTTCCCTCAGGG	4	D3	TTTAAAGAAAATCTACTTCCCTCAGGG	GGCCTTCCCACAAGGGGAGGCCAAGGA	0.210526		{-----(------------)-----}-g-a-	0.0208989	HIV Ribosomal frameshift signal
GCACTTAAGGCAAGCTTTATTGAGGCT	GCACTTAAGGCAAGCTTTATTGAGGCTTAAGCAGTGGGTTCTTTAGCTAGCCAGAGAGCTCCTAGGCTCAAATCTGGTCTA	GCACTTAAGGCAAGCTTTATTGAGGCTTAAGCAGTGGGTTCCTTAGCTAGCCAGAGAGCTCCTAGGCTTAAATCTGGTCTA	9	D2	TAAGCAGTGGGTTCGAGCTCCTAGGCT	TTTAGCTAGCCAGACAAATCTGGTCTA	0.375		c--------{-----(t---)-----}----	0.0320219	Trans-activation response element (TAR)
GCACTTAAGGCAAGCTTTATTGAGGCT	GCACTTAAGGCAAGCTTTATTGAGGCTTAAGCAGTGGGTTCTTTAGCTAGCCAGAGAGCTCCTAGGCTCAAATCTGGTCTA	GCACTTAAGGCAAGCTTTATTGAGGCTTAAGCAGTGGGTTCTTTAGCTAGCCAGAGAGCTCTTAGGCTTAAATCTGGTCTA	9	D2	TAAGCAGTGGGTTCGAGCTCCTAGGCT	TTTAGCTAGCCAGACAAATCTGGTCTA	0.375		---------{-----(t---)-----}----	0.0320219	Trans-activation response element (TAR)
GCACTTAAGGCAAGCTTTATTGAGGCT	GCACTTAAGGCAAGCTTTATTGAGGCTTAAGCAGTGGGTTCTTTAGCTAGCCAGAGAGCTCCTAGGCTCAAATCTGGTCTA	GCACTTAAGGCAAGCTTTATTGAGGCTTAAGCAGTGGGTTCCTTAGCTAGCCAGAGAGCTCTTAGGCTCAGATCTGGTCTA	6	D2	TAAGCAGTGGGTTCGAGCTCCTAGGCT	TTTAGCTAGCCAGACAAATCTGGTCTA	0.25		c--------{-----(--g-)-----}----	0.0320219	Trans-activation response element (TAR)
TAGCACTCAAGGCAAGCTTTATTGAGG	TAGCACTCAAGGCAAGCTTTATTGAGGCTTACACTCAAGGCAAGCTTTATTGAGGCTTAGCACTCAAGGCAAGCTTTATTG	TAGCACTCAAGGCAAGCTTTATTGAGGCTTAAGCAGTGGGTTCCCTAGCTAGCCAGAGAGCTCCCAGGCTCAAATCTGGTC	3	D1	CTTACACTCAAGGCAAGCTTTATTGAGG	CTTAGCACTCAAGGCAAGCTTTATTG	0.230769	----ag{-agTg(--ttcc--agc)-A-cc}a		0.0357233	Trans-activation response element (TAR)
TAGCACTCAAGGCAAGCTTTATTGAGG	TAGCACTCAAGGCAAGCTTTATTGAGGCTTACACTCAAGGCAAGCTTTATTGAGGCTTAGCACTCAAGGCAAGCTTTATTG	TAGCACTCAAGGCAAGCTTTATTGAGGCTTACACTCAAGGCAAGCTTTATTGAGGCTTACACTCAAGGCAAGCTTTATTGA	3	D1	CTTACACTCAAGGCAAGCTTTATTGAGG	CTTAGCACTCAAGGCAAGCTTTATTG	0.230769	------{-----(-----------)-----}-		0.0357233
TAGCACTCAAGGCAAGCTTTATTGAGG	TAGCACTCAAGGCAAGCTTTATTGAGGCTTACACTCAAGGCAAGCTTTATTGAGGCTTAGCACTCAAGGCAAGCTTTATTG	TAGCACTCAAGGCAAGCTTTATTGAGGCTTAGCACTCAAGGCAAGCTTTATTGAGGCTTACACTCAAGGCAAGCTTTATTG	3	D1	CTTACACTCAAGGCAAGCTTTATTGAGG	CTTAGCACTCAAGGCAAGCTTTATTG	0.230769	----gc{aCtc-(a-gc-agc--t)a-tGa}-		0.0357233
TAGCACTCAAGGCAAGCTTTATTGAGG	TAGCACTCAAGGCAAGCTTTATTGAGGCTTACACTCAAGGCAAGCTTTATTGAGGCTTAGCACTCAAGGCAAGCTTTATTG	TAGCACTCAAGGCAAGCTTTATTGAGGCTTAAGCAGTGGGTTTCTTAGCTAGCCAGAGAGCTCTTAGGCTCAAATCTGGTC	2	D1	CTTACACTCAAGGCAAGCTTTATTGAGG	CTTAGCACTCAAGGCAAGCTTTATTG	0.153846	----ag{-agTg(--tttct-agc)-A-cc}a		0.0357233	Trans-activation response element (TAR)
TAGCACTCAAGGCAAGCTTTATTGAGG	TAGCACTCAAGGCAAGCTTTATTGAGGCTTACACTCAAGGCAAGCTTTATTGAGGCTTAGCACTCAAGGCAAGCTTTATTG	TAGCACTCAAGGCAAGCTTTATTGAGGCTTAGCACTCAAGGCAAGCTTTATTGAGGCTTAGCACTCAAGGCAAGCTTTATT	2	D1	CTTACACTCAAGGCAAGCTTTATTGAGG	CTTAGCACTCAAGGCAAGCTTTATTG	0.153846	----gc{aCtc-(a-gc-agc--t)a-tGa}-		0.0357233
AGTCGCCGCCCCTCGCCTCTTGCTGTG	AGTCGCCGCCCCTCGCCTCTTGCTGTGCGCGCTTCAGCAAGCCGAGTCCTGCGTCGAGAGAGCTTCTCTGGTTTCTCTTTC	AGTCGCCGCCCCTCGCCTCTTGCTGTGCGCGCTTCAGCAAGCCGAGTCCTGCGTCGAGAGAGCTTCTCTGGCTGTCTCTTA	14	D1	CGCGCTTCAGCAAGCCGAGTCCTGCGTC	GAGAGAGCTTCTCTGGTTTCTCTTTC	0.56		-{-----(---)-----}--c-gtctc--a	0.0380273	Human immunodeficiency virus type 1 dimerisation initiation site
AGTCGCCGCCCCTCGCCTCTTGCTGTG	AGTCGCCGCCCCTCGCCTCTTGCTGTGCGCGCTTCAGCAAGCCGAGTCCTGCGTCGAGAGAGCTTCTCTGGTTTCTCTTTC	AGTCGCCGCCCCTCGCCTCTTGCTGTGCGCGCTTCAGCAAGCCGAGTCCTGCGTCGAGAGAGCTTCTCTGGTTCTGTCTCT	6	D1	CGCGCTTCAGCAAGCCGAGTCCTGCGTC	GAGAGAGCTTCTCTGGTTTCTCTTTC	0.24		-{-----(---)-----}----ctgtc-ct	0.0380273	Human immunodeficiency virus type 1 dimerisation initiation site
AGTCGCCGCCCCTCGCCTCTTGCTGTG	AGTCGCCGCCCCTCGCCTCTTGCTGTGCGCGCTTCAGCAAGCCGAGTCCTGCGTCGAGAGAGCTTCTCTGGTTTCTCTTTC	AGTCGCCGCCCCTCGCCTCTTGCTGTGCGCGCTTCAGCAAGCCGAGTCCTGCGTCGAGAGAGCTTCTCTGGTTTCCCTCTG	5	D1	CGCGCTTCAGCAAGCCGAGTCCTGCGTC	GAGAGAGCTTCTCTGGTTTCTCTTTC	0.2		-{-----(---)-----}------c--c-g	0.0380273	Human immunodeficiency virus type 1 dimerisation initiation site
GTGGGTTCCTTAGCTAGCCAGAGAGCT	GTGGGTTCCTTAGCTAGCCAGAGAGCTCCTAGGCTTAAATCTGGTCTAACTAGAGAGACCTAGTACAGGCAAAAAGCAGCT	GTGGGTTCCTTAGCTAGCCAGAGAGCTCTTAGGCTCAGATCTGGTCTAACTAGAGAGACCTAGTACAGGCAAAAAGCAGCT	6	D3	CCTAGGCTTAAATCGCAAAAAGCAGCT	TGGTCTAACTAGAGAGACCTAGTACAG	0.4		-{-----(--------)-----}--------	0.0393505	Trans-activation response element (TAR)
GTGGGTTCCTTAGCTAGCCAGAGAGCT	GTGGGTTCCTTAGCTAGCCAGAGAGCTCCTAGGCTTAAATCTGGTCTAACTAGAGAGACCTAGTACAGGCAAAAAGCAGCT	GTGGGTTCCTTAGCTAGCCAGAGAGCTCCTAGGCTCAGATCTGGTCTAACCAGAGAGACCTAGTACAGGCAAAAAGCAGCT	5	D3	CCTAGGCTTAAATCGCAAAAAGCAGCT	TGGTCTAACTAGAGAGACCTAGTACAG	0.333333		-{-----(---c----)-----}--------	0.0393505	Trans-activation response element (TAR)
GTGGGTTCCTTAGCTAGCCAGAGAGCT	GTGGGTTCCTTAGCTAGCCAGAGAGCTCCTAGGCTTAAATCTGGTCTAACTAGAGAGACCTAGTACAGGCAAAAAGCAGCT	GTGGGTTCCTTAGCTAGCCAGAGAGCTCCCAGGCTCAAATCTGGTCTAACCAGAGAGACCTAGTACAGGCAAAAAGCAGCT	4	D3	CCTAGGCTTAAATCGCAAAAAGCAGCT	TGGTCTAACTAGAGAGACCTAGTACAG	0.266667		-{-----(---c----)-----}--------	0.0393505	Trans-activation response element (TAR)
GCAAGCTTTATTGAGGCTTAAGCAGTG	GCAAGCTTTATTGAGGCTTAAGCAGTGGGTTCCCTAGCTAGCCAGAGAGCTCCCAGGCTCAAATCTGGTCTAACCAGAGAG	GCAAGCTTTATTGAGGCTTAAGCAGTGGGTTTCTTAGCTAGCCAGAGAGCTCTTAGGCTCAAATCTGGTCTAACCAGAGAG	9	D3	GGTTCCCTAGCTAGTCTAACCAGAGAG	CCAGAGAGCTCCCAGGCTCAAATCTGG	0.529412		{-----(------tt---------)-----}	0.0407438	Trans-activation response element (TAR)
GCAAGCTTTATTGAGGCTTAAGCAGTG	GCAAGCTTTATTGAGGCTTAAGCAGTGGGTTCCCTAGCTAGCCAGAGAGCTCCCAGGCTCAAATCTGGTCTAACCAGAGAG	GCAAGCTTTATTGAGGCTTAAGCAGTGGGTTCTTTAGCTAGCCAGAGAGCTCCTAGGCTCAAATCTGGTCTAACCAGAGAG	6	D3	GGTTCCCTAGCTAGTCTAACCAGAGAG	CCAGAGAGCTCCCAGGCTCAAATCTGG	0.352941		{-----(-------t---------)-----}	0.0407438	Trans-activation response element (TAR)
GCAAGCTTTATTGAGGCTTAAGCAGTG	GCAAGCTTTATTGAGGCTTAAGCAGTGGGTTCCCTAGCTAGCCAGAGAGCTCCCAGGCTCAAATCTGGTCTAACCAGAGAG	GCAAGCTTTATTGAGGCTTAAGCAGTGGGTTCTTTAGCTAGCCAGAGAGCTCCTAGGCTCAGATCTGGTCTAATTAGAGAG	2	D3	GGTTCCCTAGCTAGTCTAACCAGAGAG	CCAGAGAGCTCCCAGGCTCAAATCTGG	0.117647		{-----(-------t-------g-)-----}	0.0407438	Trans-activation response element (TAR)
GCAAGCTTTATTGAGGCTTAAGCAGTG	GCAAGCTTTATTGAGGCTTAAGCAGTGGGTTCCCTAGCTAGCCAGAGAGCTCCCAGGCTCAAATCTGGTCTAACCAGAGAG	GCAAGCTTTATTGAGGCTTAAGCAGTGGGTTTCTTAGCTAGCCAGAGAGCTCTTAGGCTCAAATCTGGTCTAACCAGAGAG	9	D1	GGTTCCCTAGCTAGCCAGAGAGCTCCCA	GGCTCAAATCTGGTCTAACCAGAGAG	0.529412		--------{------(---)------}---	0.0472122	Trans-activation response element (TAR)
GCAAGCTTTATTGAGGCTTAAGCAGTG	GCAAGCTTTATTGAGGCTTAAGCAGTGGGTTCCCTAGCTAGCCAGAGAGCTCCCAGGCTCAAATCTGGTCTAACCAGAGAG	GCAAGCTTTATTGAGGCTTAAGCAGTGGGTTCTTTAGCTAGCCAGAGAGCTCCTAGGCTCAAATCTGGTCTAACCAGAGAG	6	D1	GGTTCCCTAGCTAGCCAGAGAGCTCCCA	GGCTCAAATCTGGTCTAACCAGAGAG	0.352941		--------{------(---)------}---	0.0472122	Trans-activation response element (TAR)
GCAAGCTTTATTGAGGCTTAAGCAGTG	GCAAGCTTTATTGAGGCTTAAGCAGTGGGTTCCCTAGCTAGCCAGAGAGCTCCCAGGCTCAAATCTGGTCTAACCAGAGAG	GCAAGCTTTATTGAGGCTTAAGCAGTGGGTTCTTTAGCTAGCCAGAGAGCTCCTAGGCTCAGATCTGGTCTAATTAGAGAG	2	D1	GGTTCCCTAGCTAGCCAGAGAGCTCCCA	GGCTCAAATCTGGTCTAACCAGAGAG	0.117647		------g-{------(---)-tt---}---	0.0472122	Trans-activation response element (TAR)

## Sheet: Suppl_Table_8
anchor	base_compactor	compactor	support	segment_index	base_S1	base_S2	weight	strucNotation_1	strucNotation_2	anchor_p_BH	Rfam_match	BLAST_hits	taxonomy	species
GTCGACTCACCCAGCCCCGATTAACGT	GTCGACTCACCCAGCCCCGATTAACGTTGGACTGGAACCCTTGGTCTTTCGGCGAACGGGTTTTTCACCCGTTTTATCGT	GTCGACTCACCCAGCCCCGATTAACGTTGGACTGGAACCCTTGGTCTTTCAGCGTGCGAGTTTTTCACTCGCATTGTCGTT	7	D1	TGGACTGGAACCCTTGGTCTTTCGGCGA	ACGGGTTTTTCACCCGTTTTATCGTT	0.636364		{G--A--(-----)--T--C}a--g-----	2.27754e-12	23S ribosomal RNA	Acinetobacter sp. ESL0695 chromosome, complete genome	{'superkingdom': 'Bacteria', 'phylum': 'Pseudomonadota', 'class': 'Gammaproteobacteria', 'order': 'Moraxellales', 'family': 'Moraxellaceae', 'genus': 'Acinetobacter', 'species': 'Acinetobacter sp. ESL0695'}	Acinetobacter sp. ESL0695
GTCGACTCACCCAGCCCCGATTAACGT	GTCGACTCACCCAGCCCCGATTAACGTTGGACTGGAACCCTTGGTCTTTCGGCGAACGGGTTTTTCACCCGTTTTATCGT	GTCGACTCACCCAGCCCCGATTAACGTTGGACTGGAACCCTTGATCTTCCGGCGTGCGAGCTTTTCACTCGCATTATCGTT	2	D1	TGGACTGGAACCCTTGGTCTTTCGGCGA	ACGGGTTTTTCACCCGTTTTATCGTT	0.181818		{G--A-c(-----)--T--C}a--------	2.27754e-12	23S ribosomal RNA	Acinetobacter sp. ESL0695 chromosome, complete genome	{'superkingdom': 'Bacteria', 'phylum': 'Pseudomonadota', 'class': 'Gammaproteobacteria', 'order': 'Moraxellales', 'family': 'Moraxellaceae', 'genus': 'Acinetobacter', 'species': 'Acinetobacter sp. ESL0695'}	Acinetobacter sp. ESL0695
GTCGACTCACCCAGCCCCGATTAACGT	GTCGACTCACCCAGCCCCGATTAACGTTGGACTGGAACCCTTGGTCTTTCGGCGAACGGGTTTTTCACCCGTTTTATCGT	GTCGACTCACCCAGCCCCGATTAACGTTGGACTGGAACCCTTGGTCTTTCAGCGAGCGGGTTTTTCACCCGCTTTGTCGTT	1	D1	TGGACTGGAACCCTTGGTCTTTCGGCGA	ACGGGTTTTTCACCCGTTTTATCGTT	0.0909091		{G-----(-----)-----C}---g-----	2.27754e-12	23S ribosomal RNA	Acinetobacter sp. ESL0695 chromosome, complete genome	{'superkingdom': 'Bacteria', 'phylum': 'Pseudomonadota', 'class': 'Gammaproteobacteria', 'order': 'Moraxellales', 'family': 'Moraxellaceae', 'genus': 'Acinetobacter', 'species': 'Acinetobacter sp. ESL0695'}	Acinetobacter sp. ESL0695
GTCGACTCACCCAGCCCCGATTAACGT	GTCGACTCACCCAGCCCCGATTAACGTTGGACTGGAACCCTTGGTCTTTCGGCGAACGGGTTTTTCACCCGTTTTATCGT	GTCGACTCACCCAGCCCCGATTAACGTTGGACTGGAACCCTTGGTCTTTCGGCGAGGGAGTTTTTCACTCCCTTTATCGTT	1	D1	TGGACTGGAACCCTTGGTCTTTCGGCGA	ACGGGTTTTTCACCCGTTTTATCGTT	0.0909091		{GG-A--(-----)--T-CC}---------	2.27754e-12	23S ribosomal RNA	Acinetobacter sp. ESL0695 chromosome, complete genome	{'superkingdom': 'Bacteria', 'phylum': 'Pseudomonadota', 'class': 'Gammaproteobacteria', 'order': 'Moraxellales', 'family': 'Moraxellaceae', 'genus': 'Acinetobacter', 'species': 'Acinetobacter sp. ESL0695'}	Acinetobacter sp. ESL0695
AGTGGAGCTGGAATTACCGAGGCTGCT	AGTGGAGCTGGAATTACCGAGGCTGCTGGCACCAGACTTGCCCTCCACTTGATCCTTGTTGAAGGATTTATGCTCAACTCA	AGTGGAGCTGGAATTACCGAGGCTGCTGGCACCAGACTTGCCCTCCACTTGATCCTTACAGAAGGATTTATGCTAGGTTCA	3	D1	GGCACCAGACTTGCCCTCCACTTGATCC	TTGTTGAAGGATTTATGCTCAACTCA	0.375		--{ACa--(-----------)-agGT}---	5.09098e-11	18S ribosomal RNA	Aedes notoscriptus isolate MI1108 nuclear ribosomal DNA repeat unit genomic sequence	{'superkingdom': 'Eukaryota', 'phylum': 'Arthropoda', 'class': 'Insecta', 'order': 'Diptera', 'family': 'Culicidae', 'genus': 'Aedes', 'species': 'Aedes notoscriptus'}	Aedes notoscriptus
AGTGGAGCTGGAATTACCGAGGCTGCT	AGTGGAGCTGGAATTACCGAGGCTGCTGGCACCAGACTTGCCCTCCACTTGATCCTTGTTGAAGGATTTATGCTCAACTCA	AGTGGAGCTGGAATTACCGAGGCTGCTGGCACCAGACTTGCCCTCCACTTGATCCTTACCGAAGGATTTATGCTCGGTTCA	3	D1	GGCACCAGACTTGCCCTCCACTTGATCC	TTGTTGAAGGATTTATGCTCAACTCA	0.375		--{ACC--(-----------)--GGT}---	5.09098e-11	18S ribosomal RNA	Aedes notoscriptus isolate MI1108 nuclear ribosomal DNA repeat unit genomic sequence	{'superkingdom': 'Eukaryota', 'phylum': 'Arthropoda', 'class': 'Insecta', 'order': 'Diptera', 'family': 'Culicidae', 'genus': 'Aedes', 'species': 'Aedes notoscriptus'}	Aedes notoscriptus
AGTGGAGCTGGAATTACCGAGGCTGCT	AGTGGAGCTGGAATTACCGAGGCTGCTGGCACCAGACTTGCCCTCCACTTGATCCTTGTTGAAGGATTTATGCTCAACTCA	AGTGGAGCTGGAATTACCGAGGCTGCTGGCACCAGACTTGCACTCCAATAGATCCTTACCGAAGGATTTATGCTCGGTTCA	2	D1	GGCACCAGACTTGCCCTCCACTTGATCC	TTGTTGAAGGATTTATGCTCAACTCA	0.25		--{ACC--(-----------)--GGT}---	5.09098e-11	18S ribosomal RNA	Aedes notoscriptus isolate MI1108 nuclear ribosomal DNA repeat unit genomic sequence	{'superkingdom': 'Eukaryota', 'phylum': 'Arthropoda', 'class': 'Insecta', 'order': 'Diptera', 'family': 'Culicidae', 'genus': 'Aedes', 'species': 'Aedes notoscriptus'}	Aedes notoscriptus
GGCCTTTCACCCCTACCCACAGCTCAT	GGCCTTTCACCCCTACCCACAGCTCATCCCCCAGGTTTTCAACCCTGGTGGGTTCGGTCCTCCACGCGGTCTTACCCGCG	GGCCTTTCACCCCTACCCACAGCTCATCCCCTCAGTTTTCAACCTAAGTGGGTTCGCGCCTCCACGACGTCTTACCATCGC	3	D1	CCCCCAGGTTTTCAACCCTGGTGGGTTC	GGTCCTCCACGCGGTCTTACCCGCGC	0.333333	---{-TcA-(--------)-TaA-}-------	-cg------{--Ac-(------)-aT--}-	3.26763e-10	23S ribosomal RNA	Blastococcus sp. HT6-30 chromosome, complete genome	{'superkingdom': 'Bacteria', 'phylum': 'Actinomycetota', 'class': 'Actinomycetes', 'order': 'Geodermatophilales', 'family': 'Geodermatophilaceae', 'genus': 'Blastococcus', 'species': 'Blastococcus sp. HT6-30'}	Blastococcus sp. HT6-30
GGCCTTTCACCCCTACCCACAGCTCAT	GGCCTTTCACCCCTACCCACAGCTCATCCCCCAGGTTTTCAACCCTGGTGGGTTCGGTCCTCCACGCGGTCTTACCCGCG	GGCCTTTCACCCCTACCCACAGCTCATCCCCTCCATTTTCAACTGAAGTGGGTTCGGTCCTCCACGCGCTCTTACACGCGC	3	D1	CCCCCAGGTTTTCAACCCTGGTGGGTTC	GGTCCTCCACGCGGTCTTACCCGCGC	0.333333	---{-TcCA(--------)TGaA-}-------	---------{----c(------)a----}-	3.26763e-10	23S ribosomal RNA	Blastococcus sp. HT6-30 chromosome, complete genome	{'superkingdom': 'Bacteria', 'phylum': 'Actinomycetota', 'class': 'Actinomycetes', 'order': 'Geodermatophilales', 'family': 'Geodermatophilaceae', 'genus': 'Blastococcus', 'species': 'Blastococcus sp. HT6-30'}	Blastococcus sp. HT6-30
GGCCTTTCACCCCTACCCACAGCTCAT	GGCCTTTCACCCCTACCCACAGCTCATCCCCCAGGTTTTCAACCCTGGTGGGTTCGGTCCTCCACGCGGTCTTACCCGCG	GGCCTTTCACCCCTACCCACAGCTCATCCCCCAGGTTTTCAACCCTGGTGGGTTCGGGCCTCCACACCGTCTTACCGGCGC	1	D1	CCCCCAGGTTTTCAACCCTGGTGGGTTC	GGTCCTCCACGCGGTCTTACCCGCGC	0.111111	---{-----(--------)-----}-------	--g------{-a-C-(------)-G---}-	3.26763e-10	23S ribosomal RNA	Blastococcus sp. HT6-30 chromosome, complete genome	{'superkingdom': 'Bacteria', 'phylum': 'Actinomycetota', 'class': 'Actinomycetes', 'order': 'Geodermatophilales', 'family': 'Geodermatophilaceae', 'genus': 'Blastococcus', 'species': 'Blastococcus sp. HT6-30'}	Blastococcus sp. HT6-30
GGCCTTTCACCCCTACCCACAGCTCAT	GGCCTTTCACCCCTACCCACAGCTCATCCCCCAGGTTTTCAACCCTGGTGGGTTCGGTCCTCCACGCGGTCTTACCCGCG	GGCCTTTCACCCCTACCCACAGCTCATCCCCGCAGTTTTTAACCTACGTGGGTTCGCGCCTCCACAACCTCTTACAGCTGC	1	D1	CCCCCAGGTTTTCAACCCTGGTGGGTTC	GGTCCTCCACGCGGTCTTACCCGCGC	0.111111	---{-GcA-(----t---)-TaC-}-------	-cg------{-AaCc(------)aGcT-}-	3.26763e-10	23S ribosomal RNA	Blastococcus sp. HT6-30 chromosome, complete genome	{'superkingdom': 'Bacteria', 'phylum': 'Actinomycetota', 'class': 'Actinomycetes', 'order': 'Geodermatophilales', 'family': 'Geodermatophilaceae', 'genus': 'Blastococcus', 'species': 'Blastococcus sp. HT6-30'}	Blastococcus sp. HT6-30
GGCCTTTCACCCCTACCCACAGCTCAT	GGCCTTTCACCCCTACCCACAGCTCATCCCCCAGGTTTTCAACCCTGGTGGGTTCGGTCCTCCACGCGGTCTTACCCGCG	GGCCTTTCACCCCTACCCACAGCTCATCCCCTCAGTTTTCAACCTAAGTGGGTTCGGTCCTCCACGCGGTCTTACCCGCGC	1	D1	CCCCCAGGTTTTCAACCCTGGTGGGTTC	GGTCCTCCACGCGGTCTTACCCGCGC	0.111111	---{-TcA-(--------)-TaA-}-------	---------{-----(------)-----}-	3.26763e-10	23S ribosomal RNA	Blastococcus sp. HT6-30 chromosome, complete genome	{'superkingdom': 'Bacteria', 'phylum': 'Actinomycetota', 'class': 'Actinomycetes', 'order': 'Geodermatophilales', 'family': 'Geodermatophilaceae', 'genus': 'Blastococcus', 'species': 'Blastococcus sp. HT6-30'}	Blastococcus sp. HT6-30
CTTACAGCGGCTGCTGGCACCAGACTT	CTTACAGCGGCTGCTGGCACCAGACTTGCCCTCCACTTGATCCTTGTTGAAGGATTTATGCTCAACTCATTCCAATTATAA	CTTACAGCGGCTGCTGGCACCAGACTTGCCCTCCACTTGATCCTTACCGAAGGATTTATGCTCGGTTCATTCCAATTATAA	4	D3	GCCCTCCACTTGATATTCCAATTATAA	CCTTGTTGAAGGATTTATGCTCAACTC	0.666667		----{ACC--(-----------)--GGT}--	4.58126e-10	18S ribosomal RNA	Aedes notoscriptus isolate MI1108 nuclear ribosomal DNA repeat unit genomic sequence	{'superkingdom': 'Eukaryota', 'phylum': 'Arthropoda', 'class': 'Insecta', 'order': 'Diptera', 'family': 'Culicidae', 'genus': 'Aedes', 'species': 'Aedes notoscriptus'}	Aedes notoscriptus
CTTACAGCGGCTGCTGGCACCAGACTT	CTTACAGCGGCTGCTGGCACCAGACTTGCCCTCCACTTGATCCTTGTTGAAGGATTTATGCTCAACTCATTCCAATTATAA	CTTACAGCGGCTGCTGGCACCAGACTTGCCCTCCACTAGAAAATTACCGAACGATTTAAGCACGGATCATTCCAATAATAA	1	D3	GCCCTCCACTTGATATTCCAATTATAA	CCTTGTTGAAGGATTTATGCTCAACTC	0.166667		aa--{aCC--(-c------a--)a-GGa}--	4.58126e-10		Aedes notoscriptus isolate MI1108 nuclear ribosomal DNA repeat unit genomic sequence	{'superkingdom': 'Eukaryota', 'phylum': 'Arthropoda', 'class': 'Insecta', 'order': 'Diptera', 'family': 'Culicidae', 'genus': 'Aedes', 'species': 'Aedes notoscriptus'}	Aedes notoscriptus
CTTACAGCGGCTGCTGGCACCAGACTT	CTTACAGCGGCTGCTGGCACCAGACTTGCCCTCCACTTGATCCTTGTTGAAGGATTTATGCTCAACTCATTCCAATTATAA	CTTACAGCGGCTGCTGGCACCAGACTTTCCCTCCACTTGATACTTACAGAAGGATTTATGCTCGGTTCATTCCAATTATAA	1	D3	GCCCTCCACTTGATATTCCAATTATAA	CCTTGTTGAAGGATTTATGCTCAACTC	0.166667		a---{ACa--(-----------)--gGT}--	4.58126e-10	18S ribosomal RNA	Aedes notoscriptus isolate MI1108 nuclear ribosomal DNA repeat unit genomic sequence	{'superkingdom': 'Eukaryota', 'phylum': 'Arthropoda', 'class': 'Insecta', 'order': 'Diptera', 'family': 'Culicidae', 'genus': 'Aedes', 'species': 'Aedes notoscriptus'}	Aedes notoscriptus
GTCGAGCCCTAACCCTCCGTTACCCGT	GTCGAGCCCTAACCCTCCGTTACCCGTTGCAACCATGTTTGGCCACTACCCAAACATCGAAAGTTGATAGGGAAGAAATT	GTCGAGCCCTAACCCTCCGTTACCCGTTGTAACCATGGCAGGCCAAGACCCTGCCATCGAAAGTTGATAGGGAAGAAATTT	2	D1	TGCAACCATGTTTGGCCACTACCCAAAC	ATCGAAAGTTGATAGGGAAGAAATTT	0.4	--t------{-GCA--(---ag--)--TGC-}		1.46688e-09	18S ribosomal RNA	Paecilomyces sp. strain Consensus small subunit ribosomal RNA gene, partial sequence	{'superkingdom': 'Eukaryota', 'phylum': 'Ascomycota', 'class': 'Eurotiomycetes', 'order': 'Eurotiales', 'family': 'Thermoascaceae', 'genus': 'Paecilomyces', 'species': 'Paecilomyces sp.'}	Paecilomyces sp.
GTCGAGCCCTAACCCTCCGTTACCCGT	GTCGAGCCCTAACCCTCCGTTACCCGTTGCAACCATGTTTGGCCACTACCCAAACATCGAAAGTTGATAGGGAAGAAATT	GTCGAGCCCTAACCCTCCGTTACCCGTTGTCACCATGGCTGGCCAAGACCGAGCCATCGAAAGTTGATAGGGAAGAAATTT	2	D1	TGCAACCATGTTTGGCCACTACCCAAAC	ATCGAAAGTTGATAGGGAAGAAATTT	0.4	--tc-----{-GC---(---ag--)-g-GC-}		1.46688e-09	18S ribosomal RNA	Paecilomyces sp. strain Consensus small subunit ribosomal RNA gene, partial sequence	{'superkingdom': 'Eukaryota', 'phylum': 'Ascomycota', 'class': 'Eurotiomycetes', 'order': 'Eurotiales', 'family': 'Thermoascaceae', 'genus': 'Paecilomyces', 'species': 'Paecilomyces sp.'}	Paecilomyces sp.
GTCGAGCCCTAACCCTCCGTTACCCGT	GTCGAGCCCTAACCCTCCGTTACCCGTTGCAACCATGTTTGGCCACTACCCAAACATCGAAAGTTGATAGGGAAGAAATT	GTCGAGCCCTAACCCTCCGTTACCCGTTGTAACCATGCTAGAACACTACTCTAGCATCGAAAGTTGATAGGGAAGAAATTT	1	D1	TGCAACCATGTTTGGCCACTACCCAAAC	ATCGAAAGTTGATAGGGAAGAAATTT	0.2	--t------{-C-A-A(a------)T-T-G-}		1.46688e-09	18S ribosomal RNA	Paecilomyces sp. strain Consensus small subunit ribosomal RNA gene, partial sequence	{'superkingdom': 'Eukaryota', 'phylum': 'Ascomycota', 'class': 'Eurotiomycetes', 'order': 'Eurotiales', 'family': 'Thermoascaceae', 'genus': 'Paecilomyces', 'species': 'Paecilomyces sp.'}	Paecilomyces sp.
CATAAGGGGCATGATGACTTGACGTCA	CATAAGGGGCATGATGACTTGACGTCATCCTCATCTTCCTCCAACTCTTCGTTGGCAGTTTCGCTAGAGTCCCTAACTTA	CATAAGGGGCATGATGACTTGACGTCATCCCCACCTTCCTCCGAGTTGACCCCGGCGGTCTCCACTGAGTCCCCACCATAA	8	D1	TCCTCATCTTCCTCCAACTCTTCGTTGG	CAGTTTCGCTAGAGTCCCTAACTTAA	0.275862	---c--c------{--G-G(-tga-)CcC--}		1.01069e-08	16S ribosomal RNA	Sneathia sanguinegens strain 357015/2014 16S ribosomal RNA gene, partial sequence	{'superkingdom': 'Bacteria', 'phylum': 'Fusobacteriota', 'class': 'Fusobacteriia', 'order': 'Fusobacteriales', 'family': 'Leptotrichiaceae', 'genus': 'Sneathia', 'species': 'Sneathia sanguinegens'}	Sneathia sanguinegens
CATAAGGGGCATGATGACTTGACGTCA	CATAAGGGGCATGATGACTTGACGTCATCCTCATCTTCCTCCAACTCTTCGTTGGCAGTTTCGCTAGAGTCCCTAACTTA	CATAAGGGGCATGATGACTTGACGTCATCCCCACCTTCCTCCGAGTTGACCCCGGCAGTCTCCTATGAGTCCCCGACATTA	4	D1	TCCTCATCTTCCTCCAACTCTTCGTTGG	CAGTTTCGCTAGAGTCCCTAACTTAA	0.137931	---c--c------{--G-G(-tga-)CcC--}		1.01069e-08	16S ribosomal RNA	Sneathia sanguinegens strain 357015/2014 16S ribosomal RNA gene, partial sequence	{'superkingdom': 'Bacteria', 'phylum': 'Fusobacteriota', 'class': 'Fusobacteriia', 'order': 'Fusobacteriales', 'family': 'Leptotrichiaceae', 'genus': 'Sneathia', 'species': 'Sneathia sanguinegens'}	Sneathia sanguinegens
CATAAGGGGCATGATGACTTGACGTCA	CATAAGGGGCATGATGACTTGACGTCATCCTCATCTTCCTCCAACTCTTCGTTGGCAGTTTCGCTAGAGTCCCTAACTTA	CATAAGGGGCATGATGACTTGACGTCATCCCCACCTTCCTCCGGTTTGTCACCGGCAGTCTCATTAGAGTGCCCAACTTAA	4	D1	TCCTCATCTTCCTCCAACTCTTCGTTGG	CAGTTTCGCTAGAGTCCCTAACTTAA	0.137931	---c--c------{--GGT(-tg--)ACC--}		1.01069e-08	16S ribosomal RNA	Sneathia sanguinegens strain 357015/2014 16S ribosomal RNA gene, partial sequence	{'superkingdom': 'Bacteria', 'phylum': 'Fusobacteriota', 'class': 'Fusobacteriia', 'order': 'Fusobacteriales', 'family': 'Leptotrichiaceae', 'genus': 'Sneathia', 'species': 'Sneathia sanguinegens'}	Sneathia sanguinegens
CATAAGGGGCATGATGACTTGACGTCA	CATAAGGGGCATGATGACTTGACGTCATCCTCATCTTCCTCCAACTCTTCGTTGGCAGTTTCGCTAGAGTCCCTAACTTA	CATAAGGGGCATGATGACTTGACGTCATCCTCACCTTCCTCCGGCTTATCACCGGCAGTCTGCTCAGGGTTCCAAACTCAA	4	D1	TCCTCATCTTCCTCCAACTCTTCGTTGG	CAGTTTCGCTAGAGTCCCTAACTTAA	0.137931	------c------{--GG-(-ta--)aCC--}		1.01069e-08	16S ribosomal RNA	Sneathia sanguinegens strain 357015/2014 16S ribosomal RNA gene, partial sequence	{'superkingdom': 'Bacteria', 'phylum': 'Fusobacteriota', 'class': 'Fusobacteriia', 'order': 'Fusobacteriales', 'family': 'Leptotrichiaceae', 'genus': 'Sneathia', 'species': 'Sneathia sanguinegens'}	Sneathia sanguinegens
CATAAGGGGCATGATGACTTGACGTCA	CATAAGGGGCATGATGACTTGACGTCATCCTCATCTTCCTCCAACTCTTCGTTGGCAGTTTCGCTAGAGTCCCTAACTTA	CATAAGGGGCATGATGACTTGACGTCATCCCCACCTTCCTCCGAGTTGACCCCGGCAGTCTCCCATGAGTCCCCACCATTA	3	D1	TCCTCATCTTCCTCCAACTCTTCGTTGG	CAGTTTCGCTAGAGTCCCTAACTTAA	0.103448	---c--c------{--G-G(-tga-)CcC--}		1.01069e-08	16S ribosomal RNA	Sneathia sanguinegens strain 357015/2014 16S ribosomal RNA gene, partial sequence	{'superkingdom': 'Bacteria', 'phylum': 'Fusobacteriota', 'class': 'Fusobacteriia', 'order': 'Fusobacteriales', 'family': 'Leptotrichiaceae', 'genus': 'Sneathia', 'species': 'Sneathia sanguinegens'}	Sneathia sanguinegens
CATAAGGGGCATGATGACTTGACGTCA	CATAAGGGGCATGATGACTTGACGTCATCCTCATCTTCCTCCAACTCTTCGTTGGCAGTTTCGCTAGAGTCCCTAACTTA	CATAAGGGGCATGATGACTTGACGTCATCCCCACCTTCCTCCGGTTTGTCACCGGCAGTCTCGCATGAGTCCCCAACTAAA	3	D1	TCCTCATCTTCCTCCAACTCTTCGTTGG	CAGTTTCGCTAGAGTCCCTAACTTAA	0.103448	---c--c------{--GGT(-tg--)ACC--}		1.01069e-08	16S ribosomal RNA	Sneathia sanguinegens strain 357015/2014 16S ribosomal RNA gene, partial sequence	{'superkingdom': 'Bacteria', 'phylum': 'Fusobacteriota', 'class': 'Fusobacteriia', 'order': 'Fusobacteriales', 'family': 'Leptotrichiaceae', 'genus': 'Sneathia', 'species': 'Sneathia sanguinegens'}	Sneathia sanguinegens
CATAAGGGGCATGATGACTTGACGTCA	CATAAGGGGCATGATGACTTGACGTCATCCTCATCTTCCTCCAACTCTTCGTTGGCAGTTTCGCTAGAGTCCCTAACTTA	CATAAGGGGCATGATGACTTGACGTCATCCCCACCTTCCTCCTGCTCTTCGCAGGCAGTCTTGCTAGAGTCCCCAACTTAA	3	D1	TCCTCATCTTCCTCCAACTCTTCGTTGG	CAGTTTCGCTAGAGTCCCTAACTTAA	0.103448	---c--c------{--TG-(-----)-CA--}		1.01069e-08	16S ribosomal RNA	Sneathia sanguinegens strain 357015/2014 16S ribosomal RNA gene, partial sequence	{'superkingdom': 'Bacteria', 'phylum': 'Fusobacteriota', 'class': 'Fusobacteriia', 'order': 'Fusobacteriales', 'family': 'Leptotrichiaceae', 'genus': 'Sneathia', 'species': 'Sneathia sanguinegens'}	Sneathia sanguinegens
TGTGGCCGATCACCCTCTCAGGTCGGC	TGTGGCCGATCACCCTCTCAGGTCGGCTACGTATCATCGTCTTGGTGAGCCGTTACCTCACCAACTAACTAATACGCCGAG	TGTGGCCGATCACCCTCTCAGGTCGGCTACTGATCGTCGCCTTGGTGAGCCGTTACCTCACCAACTAGCTAATCAGACGCG	2	D3	TACGTATCATCGTCCTAATACGCCGAG	TTGGTGAGCCGTTACCTCACCAACTAA	0.4	--{-TG--(-g---c----)--CA-}a--c-	{--------(-------)--------}---g	1.28501e-07	16S ribosomal RNA	Uncultured bacterium clone GDIC2IK01AYGXD 16S ribosomal RNA gene, partial sequence	{'superkingdom': 'Bacteria', 'phylum': None, 'class': None, 'order': None, 'family': None, 'genus': None, 'species': 'uncultured bacterium'}	uncultured bacterium
TGTGGCCGATCACCCTCTCAGGTCGGC	TGTGGCCGATCACCCTCTCAGGTCGGCTACGTATCATCGTCTTGGTGAGCCGTTACCTCACCAACTAACTAATACGCCGAG	TGTGGCCGATCACCCTCTCAGGTCGGCTACCGATCGCAGGCTTGGTGGGCCGTTACCTCACCAACTACCTAATCGGACGCG	1	D3	TACGTATCATCGTCCTAATACGCCGAG	TTGGTGAGCCGTTACCTCACCAACTAA	0.2	--{-CG--(-gca-g----)--CG-}a--c-	{------g-(-------)--------}---c	1.28501e-07	16S ribosomal RNA	Uncultured bacterium clone GDIC2IK01AYGXD 16S ribosomal RNA gene, partial sequence	{'superkingdom': 'Bacteria', 'phylum': None, 'class': None, 'order': None, 'family': None, 'genus': None, 'species': 'uncultured bacterium'}	uncultured bacterium
TGTGGCCGATCACCCTCTCAGGTCGGC	TGTGGCCGATCACCCTCTCAGGTCGGCTACGTATCATCGTCTTGGTGAGCCGTTACCTCACCAACTAACTAATACGCCGAG	TGTGGCCGATCACCCTCTCAGGTCGGCTACCGATCGTCGCCTTGGTGGGCCGTTACCTCACCAAATAGCTAATCGGACGCG	1	D3	TACGTATCATCGTCCTAATACGCCGAG	TTGGTGAGCCGTTACCTCACCAACTAA	0.2	--{-CG--(-g---c----)--CG-}a--c-	{------g-(-------)--------}a--g	1.28501e-07	16S ribosomal RNA	Uncultured bacterium clone GDIC2IK01AYGXD 16S ribosomal RNA gene, partial sequence	{'superkingdom': 'Bacteria', 'phylum': None, 'class': None, 'order': None, 'family': None, 'genus': None, 'species': 'uncultured bacterium'}	uncultured bacterium
TGTGGCCGATCACCCTCTCAGGTCGGC	TGTGGCCGATCACCCTCTCAGGTCGGCTACGTATCATCGTCTTGGTGAGCCGTTACCTCACCAACTAACTAATACGCCGAG	TGTGGCCGATCACCCTCTCAGGTCGGCTACTGATCGTTGCCTTGGTAAGCCGTTACCCTACCAACTAGCTAATCAGACGCA	1	D3	TACGTATCATCGTCCTAATACGCCGAG	TTGGTGAGCCGTTACCTCACCAACTAA	0.2	--{-TG--(-g-t-c----)--CA-}a--ca	{-----A--(-------)-cT-----}---g	1.28501e-07	16S ribosomal RNA	Uncultured bacterium clone GDIC2IK01AYGXD 16S ribosomal RNA gene, partial sequence	{'superkingdom': 'Bacteria', 'phylum': None, 'class': None, 'order': None, 'family': None, 'genus': None, 'species': 'uncultured bacterium'}	uncultured bacterium
CCTAATTCCCCGTTACCCGTTGAAACC	CCTAATTCCCCGTTACCCGTTGAAACCATGGTAAGCCAATACCTTACCATCGAAAGTTGATAGGGCAGAAATTTGAATGA	CCTAATTCCCCGTTACCCGTTGAAACCATGGTAGTCCCATATACTACCATCGAAAGTTGATAGGGCAGAAATTTGAATGAA	2	D1	ATGGTAAGCCAATACCTTACCATCGAAA	GTTGATAGGGCAGAAATTTGAATGAA	0.333333	{------GT(--c---t)AC------}-----		1.0319e-06	18S ribosomal RNA	Leptosphaeria maculans 18S ribosomal RNA (IAQ61_009835), rRNA	{'superkingdom': 'Eukaryota', 'phylum': 'Ascomycota', 'class': 'Dothideomycetes', 'order': 'Pleosporales', 'family': 'Leptosphaeriaceae', 'genus': 'Plenodomus', 'species': 'Plenodomus lingam'}	Plenodomus lingam
CCTAATTCCCCGTTACCCGTTGAAACC	CCTAATTCCCCGTTACCCGTTGAAACCATGGTAAGCCAATACCTTACCATCGAAAGTTGATAGGGCAGAAATTTGAATGA	CCTAATTCCCCGTTACCCGTTGAAACCATGGTAGTCCCATATACTACCATCGAAAGTTGATTCTGCCAGTAGTCATATGCT	2	D1	ATGGTAAGCCAATACCTTACCATCGAAA	GTTGATAGGGCAGAAATTTGAATGAA	0.333333	{------GT(--c---t)AC------}-----		1.0319e-06		Leptosphaeria maculans 18S ribosomal RNA (IAQ61_009835), rRNA	{'superkingdom': 'Eukaryota', 'phylum': 'Ascomycota', 'class': 'Dothideomycetes', 'order': 'Pleosporales', 'family': 'Leptosphaeriaceae', 'genus': 'Plenodomus', 'species': 'Plenodomus lingam'}	Plenodomus lingam
CCTAATTCCCCGTTACCCGTTGAAACC	CCTAATTCCCCGTTACCCGTTGAAACCATGGTAAGCCAATACCTTACCATCGAAAGTTGATAGGGCAGAAATTTGAATGA	CCTAATTCCCCGTTACCCGTTGAAACCATGGTAGGCCTCTATCCTACCATCGAAAGTTGATAGGGCAGAAATTTGAATGAA	1	D1	ATGGTAAGCCAATACCTTACCATCGAAA	GTTGATAGGGCAGAAATTTGAATGAA	0.166667	{------G-(--tc--t)-C------}-----		1.0319e-06	18S ribosomal RNA	Leptosphaeria maculans 18S ribosomal RNA (IAQ61_009835), rRNA	{'superkingdom': 'Eukaryota', 'phylum': 'Ascomycota', 'class': 'Dothideomycetes', 'order': 'Pleosporales', 'family': 'Leptosphaeriaceae', 'genus': 'Plenodomus', 'species': 'Plenodomus lingam'}	Plenodomus lingam
CCTAATTCCCCGTTACCCGTTGAAACC	CCTAATTCCCCGTTACCCGTTGAAACCATGGTAAGCCAATACCTTACCATCGAAAGTTGATAGGGCAGAAATTTGAATGA	CCTAATTCCCCGTTACCCGTTGAAACCATGGTTAGCCAAGACCTAACCATCGAAAGTTGATAGGGCAGAAATTTGAATGAA	1	D1	ATGGTAAGCCAATACCTTACCATCGAAA	GTTGATAGGGCAGAAATTTGAATGAA	0.166667	{-----T--(----g--)--A-----}-----		1.0319e-06	18S ribosomal RNA	Leptosphaeria maculans 18S ribosomal RNA (IAQ61_009835), rRNA	{'superkingdom': 'Eukaryota', 'phylum': 'Ascomycota', 'class': 'Dothideomycetes', 'order': 'Pleosporales', 'family': 'Leptosphaeriaceae', 'genus': 'Plenodomus', 'species': 'Plenodomus lingam'}	Plenodomus lingam
GATTCTGACTTAGAGGCGTTCAGCCAT	GATTCTGACTTAGAGGCGTTCAGCCATAATCTAGCGGATGATAGCTTCGCGGCATTGCCCGATCGGACAGCCGCAAATAC	GATTCTGACTTAGAGGCGTTCAGCCATAATCTAGCAGATGATAGCTTCGCGCCATTGCCCGATCGGACAGGCGCAAATACC	8	D2	AATCTAGCGGATGATGCCCGATCGGAC	TAGCTTCGCGGCATAGCCGCAAATACC	0.421053		-------{---C-(---)-G---}-------	3.37871e-06	28S ribosomal RNA	Cutaneotrichosporon sp. HIS471 HIS471 DNA, chromosome: 7b	{'superkingdom': 'Eukaryota', 'phylum': 'Basidiomycota', 'class': 'Tremellomycetes', 'order': 'Trichosporonales', 'family': 'Trichosporonaceae', 'genus': 'Cutaneotrichosporon', 'species': 'Cutaneotrichosporon sp. HIS471'}	Cutaneotrichosporon sp. HIS471
GATTCTGACTTAGAGGCGTTCAGCCAT	GATTCTGACTTAGAGGCGTTCAGCCATAATCTAGCGGATGATAGCTTCGCGGCATTGCCCGATCGGACAGCCGCAAATAC	GATTCTGACTTAGAGGCGTTCAGCCATAATCTAGCGGATGATAGCTTCGCACCATTGCCCGATCGGACAGGTGCAAATACC	8	D2	AATCTAGCGGATGATGCCCGATCGGAC	TAGCTTCGCGGCATAGCCGCAAATACC	0.421053		-------{--AC-(---)-GT--}-------	3.37871e-06	28S ribosomal RNA	Cutaneotrichosporon sp. HIS471 HIS471 DNA, chromosome: 7b	{'superkingdom': 'Eukaryota', 'phylum': 'Basidiomycota', 'class': 'Tremellomycetes', 'order': 'Trichosporonales', 'family': 'Trichosporonaceae', 'genus': 'Cutaneotrichosporon', 'species': 'Cutaneotrichosporon sp. HIS471'}	Cutaneotrichosporon sp. HIS471
GATTCTGACTTAGAGGCGTTCAGCCAT	GATTCTGACTTAGAGGCGTTCAGCCATAATCTAGCGGATGATAGCTTCGCGGCATTGCCCGATCGGACAGCCGCAAATAC	GATTCTGACTTAGAGGCGTTCAGCCATAATCCAACACGTGGTAGCTTCACACCATTGTCTTATCAAACAGATGTAAATACC	3	D2	AATCTAGCGGATGATGCCCGATCGGAC	TAGCTTCGCGGCATAGCCGCAAATACC	0.157895		-------{A-Ac-(---)-aT-T}-------	3.37871e-06	28S ribosomal RNA	Cutaneotrichosporon sp. HIS471 HIS471 DNA, chromosome: 7b	{'superkingdom': 'Eukaryota', 'phylum': 'Basidiomycota', 'class': 'Tremellomycetes', 'order': 'Trichosporonales', 'family': 'Trichosporonaceae', 'genus': 'Cutaneotrichosporon', 'species': 'Cutaneotrichosporon sp. HIS471'}	Cutaneotrichosporon sp. HIS471
GTTTAACAGATGTGCCGCCCCAGCCAA	GTTTAACAGATGTGCCGCCCCAGCCAAACTCCCCACCTGACTATGTCTTCCACATAGATCAGCAGCAAAGCTGCTTTAAA	GTTTAACAGATGTGCCGCCCCAGCCAAACTCCCCACCTGACAATGTCTTCAACCCGGATCGGTCTGTAAAAGACTTTGAAT	7	D1	ACTCCCCACCTGACTATGTCTTCCACAT	AGATCAGCAGCAAAGCTGCTTTAAAG	0.636364		g----{g-TCTg(t--)aAGA--}--g--t	1.11782e-05	28S ribosomal RNA	Sterkiella histriomuscorum 17S ribosomal RNA gene, internal transcribed spacer 1, 5.8S ribosomal RNA gene, internal transcribed spacer 2, and 28S ribosomal RNA gene, complete sequence; macronuclear	{'superkingdom': 'Eukaryota', 'phylum': 'Ciliophora', 'class': 'Spirotrichea', 'order': 'Sporadotrichida', 'family': 'Oxytrichidae', 'genus': 'Sterkiella', 'species': 'Sterkiella histriomuscorum'}	Sterkiella histriomuscorum
GTTTAACAGATGTGCCGCCCCAGCCAA	GTTTAACAGATGTGCCGCCCCAGCCAAACTCCCCACCTGACTATGTCTTCCACATAGATCAGCAGCAAAGCTGCTTTAAA	GTTTAACAGATGTGCCGCCCCAGCCAAACTCCCCACCTGACAATGTCTTCAACCTGGATCGCCGTCCCTTGCGGGCGACTT	2	D1	ACTCCCCACCTGACTATGTCTTCCACAT	AGATCAGCAGCAAAGCTGCTTTAAAG	0.181818		g----{gC-Gt-(cct)tgC-Gg}cg-ctt	1.11782e-05		Sterkiella histriomuscorum 17S ribosomal RNA gene, internal transcribed spacer 1, 5.8S ribosomal RNA gene, internal transcribed spacer 2, and 28S ribosomal RNA gene, complete sequence; macronuclear	{'superkingdom': 'Eukaryota', 'phylum': 'Ciliophora', 'class': 'Spirotrichea', 'order': 'Sporadotrichida', 'family': 'Oxytrichidae', 'genus': 'Sterkiella', 'species': 'Sterkiella histriomuscorum'}	Sterkiella histriomuscorum
GTTTAACAGATGTGCCGCCCCAGCCAA	GTTTAACAGATGTGCCGCCCCAGCCAAACTCCCCACCTGACTATGTCTTCCACATAGATCAGCAGCAAAGCTGCTTTAAA	GTTTAACAGATGTGCCGCCCCAGCCAAACTCCCCACCTGACGATGTCTTCCGCGTAGATCACCGGGTAAACCGGCTTAACA	2	D1	ACTCCCCACCTGACTATGTCTTCCACAT	AGATCAGCAGCAAAGCTGCTTTAAAG	0.181818		-----{-C-G-g(t--)a-C-Gc}----ca	1.11782e-05	28S ribosomal RNA	Sterkiella histriomuscorum 17S ribosomal RNA gene, internal transcribed spacer 1, 5.8S ribosomal RNA gene, internal transcribed spacer 2, and 28S ribosomal RNA gene, complete sequence; macronuclear	{'superkingdom': 'Eukaryota', 'phylum': 'Ciliophora', 'class': 'Spirotrichea', 'order': 'Sporadotrichida', 'family': 'Oxytrichidae', 'genus': 'Sterkiella', 'species': 'Sterkiella histriomuscorum'}	Sterkiella histriomuscorum
TAGTGGAGCTGGAATTGCCGCGGCTGC	TAGTGGAGCTGGAATTGCCGCGGCTGCTGGCACCAGACTTGCCCTCCACTTGATCCTTACCGAAGGATTTATGCTCGGTTC	TAGTGGAGCTGGAATTGCCGCGGCTGCTGGCACCAGACTTGCCCTCCACTTGATCCTTGTTGAAGGATTTATGCTCAACTC	2	D1	TGGCACCAGACTTGCCCTCCACTTGATC	CTTACCGAAGGATTTATGCTCGGTTC	0.5		---{GTT--(-----------)--AAC}--	6.24017e-05	18S ribosomal RNA	Culex tritaeniorhynchus isolate MG_S115 small subunit ribosomal RNA, partial sequence	{'superkingdom': 'Eukaryota', 'phylum': 'Arthropoda', 'class': 'Insecta', 'order': 'Diptera', 'family': 'Culicidae', 'genus': 'Culex', 'species': 'Culex tritaeniorhynchus'}	Culex tritaeniorhynchus
TAGTGGAGCTGGAATTGCCGCGGCTGC	TAGTGGAGCTGGAATTGCCGCGGCTGCTGGCACCAGACTTGCCCTCCACTTGATCCTTACCGAAGGATTTATGCTCGGTTC	TAGTGGAGCTGGAATTGCCGCGGCTGCAGGCACCATACTTGCCCTCCAATTTATCCTTGTTGAATGATATATCCTCAAATC	1	D1	TGGCACCAGACTTGCCCTCCACTTGATC	CTTACCGAAGGATTTATGCTCGGTTC	0.25		---{gTT--(-t---a---c-)--AAa}--	6.24017e-05		Culex tritaeniorhynchus isolate MG_S115 small subunit ribosomal RNA, partial sequence	{'superkingdom': 'Eukaryota', 'phylum': 'Arthropoda', 'class': 'Insecta', 'order': 'Diptera', 'family': 'Culicidae', 'genus': 'Culex', 'species': 'Culex tritaeniorhynchus'}	Culex tritaeniorhynchus
TAGTGGAGCTGGAATTGCCGCGGCTGC	TAGTGGAGCTGGAATTGCCGCGGCTGCTGGCACCAGACTTGCCCTCCACTTGATCCTTACCGAAGGATTTATGCTCGGTTC	TAGTGGAGCTGGAATTGCCGCGGCTGCTGGCACCAGACTTGCCCTCCACTTGATCCTTGTTGAAGGATTTAGATCGGAAGA	1	D1	TGGCACCAGACTTGCCCTCCACTTGATC	CTTACCGAAGGATTTATGCTCGGTTC	0.25		---{gTt--(--------gat)cg-Aa}ga	6.24017e-05	18S ribosomal RNA	Culex tritaeniorhynchus isolate MG_S115 small subunit ribosomal RNA, partial sequence	{'superkingdom': 'Eukaryota', 'phylum': 'Arthropoda', 'class': 'Insecta', 'order': 'Diptera', 'family': 'Culicidae', 'genus': 'Culex', 'species': 'Culex tritaeniorhynchus'}	Culex tritaeniorhynchus
CCGGAACCCAAAAACTTTGATTTCTCA	CCGGAACCCAAAAACTTTGATTTCTCATAAGGTGCCAGCGGAGTCCTAAAAGCAACATCCGCTGATCCCTGGTCGGCATCG	CCGGAACCCAAAAACTTTGATTTCTCATAAGGTGCCGGCGGCGTCCTAAAAGTAACATCCGCCGATCCCTGGTCGGCATCG	3	D2	TAAGGTGCCAGCGGCATCCGCTGATCC	AGTCCTAAAAGCAACTGGTCGGCATCG	0.375	--------{-G----(---)----C-}----		7.67307e-05	18S ribosomal RNA	Brassica nigra genome assembly, chromosome: 1	{'superkingdom': 'Eukaryota', 'phylum': 'Streptophyta', 'class': 'Magnoliopsida', 'order': 'Brassicales', 'family': 'Brassicaceae', 'genus': 'Brassica', 'species': 'Brassica nigra'}	Brassica nigra
CCGGAACCCAAAAACTTTGATTTCTCA	CCGGAACCCAAAAACTTTGATTTCTCATAAGGTGCCAGCGGAGTCCTAAAAGCAACATCCGCTGATCCCTGGTCGGCATCG	CCGGAACCCAAAAACTTTGATTTCTCATAAGGTGCCGGCGGTGTCCTAAGAGCAACATCCGCCGATCCCTGGTCGGCATCG	2	D2	TAAGGTGCCAGCGGCATCCGCTGATCC	AGTCCTAAAAGCAACTGGTCGGCATCG	0.25	--------{-G----(---)----C-}----		7.67307e-05		Brassica nigra genome assembly, chromosome: 1	{'superkingdom': 'Eukaryota', 'phylum': 'Streptophyta', 'class': 'Magnoliopsida', 'order': 'Brassicales', 'family': 'Brassicaceae', 'genus': 'Brassica', 'species': 'Brassica nigra'}	Brassica nigra
CCGGAACCCAAAAACTTTGATTTCTCA	CCGGAACCCAAAAACTTTGATTTCTCATAAGGTGCCAGCGGAGTCCTAAAAGCAACATCCGCTGATCCCTGGTCGGCATCG	CCGGAACCCAAAAACTTTGATTTCTCATAAGGTGCCGAACGAGTCAATAATTATACATCGTCCGATCCCTAGTCGGCATAG	1	D2	TAAGGTGCCAGCGGCATCCGCTGATCC	AGTCCTAAAAGCAACTGGTCGGCATCG	0.125	--------{-GaAC-(---)-GT-C-}----		7.67307e-05	18S ribosomal RNA	Brassica nigra genome assembly, chromosome: 1	{'superkingdom': 'Eukaryota', 'phylum': 'Streptophyta', 'class': 'Magnoliopsida', 'order': 'Brassicales', 'family': 'Brassicaceae', 'genus': 'Brassica', 'species': 'Brassica nigra'}	Brassica nigra
CCGGAACCCAAAAACTTTGATTTCTCA	CCGGAACCCAAAAACTTTGATTTCTCATAAGGTGCCAGCGGAGTCCTAAAAGCAACATCCGCTGATCCCTGGTCGGCATCG	CCGGAACCCAAAAACTTTGATTTCTCATAAGGTGCCGATGAGGTCAAAAATATGTACGCTCACCGATCCCTAGTCGGCATA	1	D2	TAAGGTGCCAGCGGCATCCGCTGATCC	AGTCCTAAAAGCAACTGGTCGGCATCG	0.125	--------{-Gat-a(acg)-tcaCc}gat-		7.67307e-05		Brassica nigra genome assembly, chromosome: 1	{'superkingdom': 'Eukaryota', 'phylum': 'Streptophyta', 'class': 'Magnoliopsida', 'order': 'Brassicales', 'family': 'Brassicaceae', 'genus': 'Brassica', 'species': 'Brassica nigra'}	Brassica nigra
CCGGAACCCAAAAACTTTGATTTCTCA	CCGGAACCCAAAAACTTTGATTTCTCATAAGGTGCCAGCGGAGTCCTAAAAGCAACATCCGCTGATCCCTGGTCGGCATCG	CCGGAACCCAAAAACTTTGATTTCTCATAAGGTGCTGGCGGGGTCATCGATAGAACACCCGCCAATCCCTAGTCTGCATCG	1	D2	TAAGGTGCCAGCGGCATCCGCTGATCC	AGTCCTAAAAGCAACTGGTCGGCATCG	0.125	--------{TG----(--c)----CA}----		7.67307e-05		Brassica nigra genome assembly, chromosome: 1	{'superkingdom': 'Eukaryota', 'phylum': 'Streptophyta', 'class': 'Magnoliopsida', 'order': 'Brassicales', 'family': 'Brassicaceae', 'genus': 'Brassica', 'species': 'Brassica nigra'}	Brassica nigra
CTAATTCCCCGTTACCCGTTGAAACCA	CTAATTCCCCGTTACCCGTTGAAACCATGGTAAGCCAATACCTTACCATCGAAAGTTGATAGGGCAGAAATTTGAATGAA	CTAATTCCCCGTTACCCGTTGAAACCATGGTAGGCCACTATCCTACCATCGAAAGTTGATAGGGCAGAAATTTGAATGAAC	6	D1	TGGTAAGCCAATACCTTACCATCGAAAG	TTGATAGGGCAGAAATTTGAATGAAC	0.6	{-----G-(---c--t)-C-----}-------		8.28353e-05	18S ribosomal RNA	Leptosphaeria maculans 18S ribosomal RNA (IAQ61_009835), rRNA	{'superkingdom': 'Eukaryota', 'phylum': 'Ascomycota', 'class': 'Dothideomycetes', 'order': 'Pleosporales', 'family': 'Leptosphaeriaceae', 'genus': 'Plenodomus', 'species': 'Plenodomus lingam'}	Plenodomus lingam
CTAATTCCCCGTTACCCGTTGAAACCA	CTAATTCCCCGTTACCCGTTGAAACCATGGTAAGCCAATACCTTACCATCGAAAGTTGATAGGGCAGAAATTTGAATGAA	CTAATTCCCCGTTACCCGTTGAAACCATCGTAAGCCAAGACCATACGATTGAAAGTTGATAGGGCAGAAATTTGAATGAAC	2	D1	TGGTAAGCCAATACCTTACCATCGAAAG	TTGATAGGGCAGAAATTTGAATGAAC	0.2	{-C-----(----g--)-a---G-}-t-----		8.28353e-05	18S ribosomal RNA	Leptosphaeria maculans 18S ribosomal RNA (IAQ61_009835), rRNA	{'superkingdom': 'Eukaryota', 'phylum': 'Ascomycota', 'class': 'Dothideomycetes', 'order': 'Pleosporales', 'family': 'Leptosphaeriaceae', 'genus': 'Plenodomus', 'species': 'Plenodomus lingam'}	Plenodomus lingam
CTAATTCCCCGTTACCCGTTGAAACCA	CTAATTCCCCGTTACCCGTTGAAACCATGGTAAGCCAATACCTTACCATCGAAAGTTGATAGGGCAGAAATTTGAATGAA	CTAATTCCCCGTTACCCGTTGAAACCATGGTAGTCCCATATACTACCATCGAAAGTTGATAGGGCAGAAATTTGAATGAAC	2	D1	TGGTAAGCCAATACCTTACCATCGAAAG	TTGATAGGGCAGAAATTTGAATGAAC	0.2	{-----GT(--c---t)AC-----}-------		8.28353e-05	18S ribosomal RNA	Leptosphaeria maculans 18S ribosomal RNA (IAQ61_009835), rRNA	{'superkingdom': 'Eukaryota', 'phylum': 'Ascomycota', 'class': 'Dothideomycetes', 'order': 'Pleosporales', 'family': 'Leptosphaeriaceae', 'genus': 'Plenodomus', 'species': 'Plenodomus lingam'}	Plenodomus lingam
TTACCGCGGCGGCTGGCACCAGACTTG	TTACCGCGGCGGCTGGCACCAGACTTGCCCTCCACTTGATCCTTACCGAAGGATTTATGCTCGGTTCATTCCAATTATAA	TTACCGCGGCGGCTGGCACCAGACTTGCCCTCCACTTGATCCTTGGTGAAGGATTTATGCTCAACTCATTCCAATTATAAG	2	D3	CCCTCCACTTGATCTTCCAATTATAAA	CTTACCGAAGGATTTATGCTCGGTTCA	0.333333		---{GgT--(-----------)--AaC}---	8.52634e-05	18S ribosomal RNA	Culex tritaeniorhynchus isolate MG_S115 small subunit ribosomal RNA, partial sequence	{'superkingdom': 'Eukaryota', 'phylum': 'Arthropoda', 'class': 'Insecta', 'order': 'Diptera', 'family': 'Culicidae', 'genus': 'Culex', 'species': 'Culex tritaeniorhynchus'}	Culex tritaeniorhynchus
TTACCGCGGCGGCTGGCACCAGACTTG	TTACCGCGGCGGCTGGCACCAGACTTGCCCTCCACTTGATCCTTACCGAAGGATTTATGCTCGGTTCATTCCAATTATAA	TTACCGCGGCGGCTGGCACCAGACTTGCCCTCCACTGGATCCGTGTTGAAGGAGTTATGCTCAACTCATTCCAATTATAAG	1	D3	CCCTCCACTTGATCTTCCAATTATAAA	CTTACCGAAGGATTTATGCTCGGTTCA	0.166667		-g-{GTT--(----g------)--AAC}---	8.52634e-05	18S ribosomal RNA	Culex tritaeniorhynchus isolate MG_S115 small subunit ribosomal RNA, partial sequence	{'superkingdom': 'Eukaryota', 'phylum': 'Arthropoda', 'class': 'Insecta', 'order': 'Diptera', 'family': 'Culicidae', 'genus': 'Culex', 'species': 'Culex tritaeniorhynchus'}	Culex tritaeniorhynchus
TTACCGCGGCGGCTGGCACCAGACTTG	TTACCGCGGCGGCTGGCACCAGACTTGCCCTCCACTTGATCCTTACCGAAGGATTTATGCTCGGTTCATTCCAATTATAA	TTACCGCGGCGGCTGGCACCAGACTTGCCCTCCACTTGATCCTTACCGAAGGATGTATGCTCGGTGCATTCCCAGTATAAA	1	D3	CCCTCCACTTGATCTTCCAATTATAAA	CTTACCGAAGGATTTATGCTCGGTTCA	0.166667		---{-----(-----g-----)-----}g--	8.52634e-05		Culex tritaeniorhynchus isolate MG_S115 small subunit ribosomal RNA, partial sequence	{'superkingdom': 'Eukaryota', 'phylum': 'Arthropoda', 'class': 'Insecta', 'order': 'Diptera', 'family': 'Culicidae', 'genus': 'Culex', 'species': 'Culex tritaeniorhynchus'}	Culex tritaeniorhynchus
TTACCGCGGCGGCTGGCACCAGACTTG	TTACCGCGGCGGCTGGCACCAGACTTGCCCTCCACTTGATCCTTACCGAAGGATTTATGCTCGGTTCATTCCAATTATAA	TTACCGCGGCGGCTGGCACCAGACTTGCCCTCCACTTGATCCTTGTTGAAGGATTTATGATCGACTCATTCAAATTAGAAG	1	D3	CCCTCCACTTGATCTTCCAATTATAAA	CTTACCGAAGGATTTATGCTCGGTTCA	0.166667		---{GTt--(----------a)---AC}---	8.52634e-05	18S ribosomal RNA	Culex tritaeniorhynchus isolate MG_S115 small subunit ribosomal RNA, partial sequence	{'superkingdom': 'Eukaryota', 'phylum': 'Arthropoda', 'class': 'Insecta', 'order': 'Diptera', 'family': 'Culicidae', 'genus': 'Culex', 'species': 'Culex tritaeniorhynchus'}	Culex tritaeniorhynchus
TTACCGCGGCGGCTGGCACCAGACTTG	TTACCGCGGCGGCTGGCACCAGACTTGCCCTCCACTTGATCCTTACCGAAGGATTTATGCTCGGTTCATTCCAATTATAA	TTACCGCGGCGGCTGGCACCAGACTTGCCCTCCACTTGATCGTTGTTGTAGGATTTATGCTCAACTCATTCCAATTATAAG	1	D3	CCCTCCACTTGATCTTCCAATTATAAA	CTTACCGAAGGATTTATGCTCGGTTCA	0.166667		g--{GTT-t(-----------)--AAC}---	8.52634e-05	18S ribosomal RNA	Culex tritaeniorhynchus isolate MG_S115 small subunit ribosomal RNA, partial sequence	{'superkingdom': 'Eukaryota', 'phylum': 'Arthropoda', 'class': 'Insecta', 'order': 'Diptera', 'family': 'Culicidae', 'genus': 'Culex', 'species': 'Culex tritaeniorhynchus'}	Culex tritaeniorhynchus
CTTAGATGTTTCAGTTCCCCTGGTTCG	CTTAGATGTTTCAGTTCCCCTGGTTCGCCTCATGCACCTATGTATTCAGTGTATGATACTCATCTTATGATGAGTGGGTT	CTTAGATGTTTCAGTTCCCCTGGTTCGCCTCTTGCACCTATGTATTCAGTACAAGATACTCAGCTTATGCTGAGTGGGTTC	4	D1	CCTCATGCACCTATGTATTCAGTGTATG	ATACTCATCTTATGATGAGTGGGTTT	0.444444		--{-----G-(----)-C-----}-----c	0.000350107		Halomonas sulfidaeris ATCC BAA-803 DNA, complete genome	{'superkingdom': 'Bacteria', 'phylum': 'Pseudomonadota', 'class': 'Gammaproteobacteria', 'order': 'Oceanospirillales', 'family': 'Halomonadaceae', 'genus': 'Vreelandella', 'species': 'Vreelandella sulfidaeris'}	Vreelandella sulfidaeris
CTTAGATGTTTCAGTTCCCCTGGTTCG	CTTAGATGTTTCAGTTCCCCTGGTTCGCCTCATGCACCTATGTATTCAGTGTATGATACTCATCTTATGATGAGTGGGTT	CTTAGATGTTTCAGTTCCCCTGGTTCGCCTCTTACGCCTATGTATTCAGCGTAAGATAACTGTCTTATGACAGCTGGGTTC	1	D1	CCTCATGCACCTATGTATTCAGTGTATG	ATACTCATCTTATGATGAGTGGGTTT	0.111111		--{-aCTG--(----)--CAGc-}-----c	0.000350107	23S ribosomal RNA	Halomonas sulfidaeris ATCC BAA-803 DNA, complete genome	{'superkingdom': 'Bacteria', 'phylum': 'Pseudomonadota', 'class': 'Gammaproteobacteria', 'order': 'Oceanospirillales', 'family': 'Halomonadaceae', 'genus': 'Vreelandella', 'species': 'Vreelandella sulfidaeris'}	Vreelandella sulfidaeris
CTTAGATGTTTCAGTTCCCCTGGTTCG	CTTAGATGTTTCAGTTCCCCTGGTTCGCCTCATGCACCTATGTATTCAGTGTATGATACTCATCTTATGATGAGTGGGTT	CTTAGATGTTTCAGTTCCCCTGGTTCGCCTCTTGCACCTATGTATTCAGTACAAGATAACCAGCTTGTGCTGGCTGGGTTC	1	D1	CCTCATGCACCTATGTATTCAGTGTATG	ATACTCATCTTATGATGAGTGGGTTT	0.111111		--{-aC--G-(--g-)-C--Gc-}-----c	0.000350107		Halomonas sulfidaeris ATCC BAA-803 DNA, complete genome	{'superkingdom': 'Bacteria', 'phylum': 'Pseudomonadota', 'class': 'Gammaproteobacteria', 'order': 'Oceanospirillales', 'family': 'Halomonadaceae', 'genus': 'Vreelandella', 'species': 'Vreelandella sulfidaeris'}	Vreelandella sulfidaeris
CTTAGATGTTTCAGTTCCCCTGGTTCG	CTTAGATGTTTCAGTTCCCCTGGTTCGCCTCATGCACCTATGTATTCAGTGTATGATACTCATCTTATGATGAGTGGGTT	CTTAGATGTTTCAGTTCCCCTGGTTCGCCTCTTGCACCTATGTATTCAGTACAAGATAACCATCTTATGATGGCTGGGTTC	1	D1	CCTCATGCACCTATGTATTCAGTGTATG	ATACTCATCTTATGATGAGTGGGTTT	0.111111		--{-aC----(----)----Gc-}-----c	0.000350107		Halomonas sulfidaeris ATCC BAA-803 DNA, complete genome	{'superkingdom': 'Bacteria', 'phylum': 'Pseudomonadota', 'class': 'Gammaproteobacteria', 'order': 'Oceanospirillales', 'family': 'Halomonadaceae', 'genus': 'Vreelandella', 'species': 'Vreelandella sulfidaeris'}	Vreelandella sulfidaeris
CTTAGATGTTTCAGTTCCCCTGGTTCG	CTTAGATGTTTCAGTTCCCCTGGTTCGCCTCATGCACCTATGTATTCAGTGTATGATACTCATCTTATGATGAGTGGGTT	CTTAGATGTTTCAGTTCCCCTGGTTCGCCTCTTGCACCTATGTATTCAGTACAAGATACCCGGCTTATGCCGGGTGGGTTC	1	D1	CCTCATGCACCTATGTATTCAGTGTATG	ATACTCATCTTATGATGAGTGGGTTT	0.111111		--{--C-GG-(----)-CC-G--}-----c	0.000350107	23S ribosomal RNA	Halomonas sulfidaeris ATCC BAA-803 DNA, complete genome	{'superkingdom': 'Bacteria', 'phylum': 'Pseudomonadota', 'class': 'Gammaproteobacteria', 'order': 'Oceanospirillales', 'family': 'Halomonadaceae', 'genus': 'Vreelandella', 'species': 'Vreelandella sulfidaeris'}	Vreelandella sulfidaeris
CTTAGATGTTTCAGTTCCCCTGGTTCG	CTTAGATGTTTCAGTTCCCCTGGTTCGCCTCATGCACCTATGTATTCAGTGTATGATACTCATCTTATGATGAGTGGGTT	CTTAGATGTTTCAGTTCCCCTGGTTCGCTTCTCATGCCTATGTATTCAGCATGAGATAACCATCTTATGATGGCTGGGTTC	1	D1	CCTCATGCACCTATGTATTCAGTGTATG	ATACTCATCTTATGATGAGTGGGTTT	0.111111		--{-aC----(----)----Gc-}-----c	0.000350107	23S ribosomal RNA	Halomonas sulfidaeris ATCC BAA-803 DNA, complete genome	{'superkingdom': 'Bacteria', 'phylum': 'Pseudomonadota', 'class': 'Gammaproteobacteria', 'order': 'Oceanospirillales', 'family': 'Halomonadaceae', 'genus': 'Vreelandella', 'species': 'Vreelandella sulfidaeris'}	Vreelandella sulfidaeris
GCCTTTCACCCCTACCCACAGCTCATC	GCCTTTCACCCCTACCCACAGCTCATCCCCTAATTTTTCAACATTAGTGGGTTCGGACCTCCAGGGCGTGTTACCGCACC	GCCTTTCACCCCTACCCACAGCTCATCGAAATACTTTTCAACGTAAACTCGTTCGGTCCTCCAGTGTGTGTTACCACACCT	3	D1	CCCTAATTTTTCAACATTAGTGGGTTCG	GACCTCCAGGGCGTGTTACCGCACCT	0.375	ga{aaT-C(--------)G-A-a}ctc-----		0.000434073	23S ribosomal RNA	Janthinobacterium sp. TB1-E2 chromosome, complete genome	{'superkingdom': 'Bacteria', 'phylum': 'Pseudomonadota', 'class': 'Betaproteobacteria', 'order': 'Burkholderiales', 'family': 'Oxalobacteraceae', 'genus': 'Janthinobacterium', 'species': 'Janthinobacterium sp. TB1-E2'}	Janthinobacterium sp. TB1-E2
GCCTTTCACCCCTACCCACAGCTCATC	GCCTTTCACCCCTACCCACAGCTCATCCCCTAATTTTTCAACATTAGTGGGTTCGGACCTCCAGGGCGTGTTACCGCACC	GCCTTTCACCCCTACCCACAGCTCATCCCCTCCATTTTCAACTGAAGTGGGTTCGGTCCTCCACGCGCTCTTACACGCGCT	2	D1	CCCTAATTTTTCAACATTAGTGGGTTCG	GACCTCCAGGGCGTGTTACCGCACCT	0.25	--{--cCA(--------)TGa--}--------		0.000434073	23S ribosomal RNA	Janthinobacterium sp. TB1-E2 chromosome, complete genome	{'superkingdom': 'Bacteria', 'phylum': 'Pseudomonadota', 'class': 'Betaproteobacteria', 'order': 'Burkholderiales', 'family': 'Oxalobacteraceae', 'genus': 'Janthinobacterium', 'species': 'Janthinobacterium sp. TB1-E2'}	Janthinobacterium sp. TB1-E2
GCCTTTCACCCCTACCCACAGCTCATC	GCCTTTCACCCCTACCCACAGCTCATCCCCTAATTTTTCAACATTAGTGGGTTCGGACCTCCAGGGCGTGTTACCGCACC	GCCTTTCACCCCTACCCACAGCTCATCCCCCCAGTTTTCAACCTAGGTGGGTTCGGTCCTCCACACGCTCTTACACGTGCT	1	D1	CCCTAATTTTTCAACATTAGTGGGTTCG	GACCTCCAGGGCGTGTTACCGCACCT	0.125	--{-Cc-G(--------)C-aG-}--------		0.000434073	23S ribosomal RNA	Janthinobacterium sp. TB1-E2 chromosome, complete genome	{'superkingdom': 'Bacteria', 'phylum': 'Pseudomonadota', 'class': 'Betaproteobacteria', 'order': 'Burkholderiales', 'family': 'Oxalobacteraceae', 'genus': 'Janthinobacterium', 'species': 'Janthinobacterium sp. TB1-E2'}	Janthinobacterium sp. TB1-E2
GCCTTTCACCCCTACCCACAGCTCATC	GCCTTTCACCCCTACCCACAGCTCATCCCCTAATTTTTCAACATTAGTGGGTTCGGACCTCCAGGGCGTGTTACCGCACC	GCCTTTCACCCCTACCCACAGCTCATCCCCTAACTTTTCAACGTTAGTGGGTTCGGACCTCCAGTACCTGTTACGGCACCT	1	D1	CCCTAATTTTTCAACATTAGTGGGTTCG	GACCTCCAGGGCGTGTTACCGCACCT	0.125	--{----C(--------)G----}--------		0.000434073	23S ribosomal RNA	Janthinobacterium sp. TB1-E2 chromosome, complete genome	{'superkingdom': 'Bacteria', 'phylum': 'Pseudomonadota', 'class': 'Betaproteobacteria', 'order': 'Burkholderiales', 'family': 'Oxalobacteraceae', 'genus': 'Janthinobacterium', 'species': 'Janthinobacterium sp. TB1-E2'}	Janthinobacterium sp. TB1-E2
GCCTTTCACCCCTACCCACAGCTCATC	GCCTTTCACCCCTACCCACAGCTCATCCCCTAATTTTTCAACATTAGTGGGTTCGGACCTCCAGGGCGTGTTACCGCACC	GCCTTTCACCCCTACCCACAGCTCATCCCCTAATTTTTCAACATTAGTGGGTTCGGACCTCCAGTACCTGTTACGGCACCT	1	D1	CCCTAATTTTTCAACATTAGTGGGTTCG	GACCTCCAGGGCGTGTTACCGCACCT	0.125	--{-----(--------)-----}--------		0.000434073	23S ribosomal RNA	Janthinobacterium sp. TB1-E2 chromosome, complete genome	{'superkingdom': 'Bacteria', 'phylum': 'Pseudomonadota', 'class': 'Betaproteobacteria', 'order': 'Burkholderiales', 'family': 'Oxalobacteraceae', 'genus': 'Janthinobacterium', 'species': 'Janthinobacterium sp. TB1-E2'}	Janthinobacterium sp. TB1-E2
GAATTACCGCGGCGGCGGGCACCAGAC	GAATTACCGCGGCGGCGGGCACCAGACTTGGCCTCCGCTGGATCCTTGTTGAGGGATTTATGCTCAACTCATTCCAATTA	GAATTACCGCGGCGGCGGGCACCAGACTTGCCCTCCGGTTGATCCTTACCGAGGGATTTATGCGCGGTTCATTCCAATTAT	2	D3	TTGGCCTCCGCTGGTCATTCCAATTAT	ATCCTTGTTGAGGGATTTATGCTCAAC	0.222222		------{ACC---(---------)-g-GGT}	0.000459314	18S ribosomal RNA	PREDICTED: Ochlerotatus camptorhynchus small subunit ribosomal RNA (LOC135717040), rRNA	{'superkingdom': 'Eukaryota', 'phylum': 'Arthropoda', 'class': 'Insecta', 'order': 'Diptera', 'family': 'Culicidae', 'genus': 'Ochlerotatus', 'species': 'Ochlerotatus camptorhynchus'}	Ochlerotatus camptorhynchus
GAATTACCGCGGCGGCGGGCACCAGAC	GAATTACCGCGGCGGCGGGCACCAGACTTGGCCTCCGCTGGATCCTTGTTGAGGGATTTATGCTCAACTCATTCCAATTA	GAATTACCGCGGCGGCGGGCACCAGACTTGCCCTGCGCTTGATCCTTGTTGAGGGATTTATGCTCAACTCATTCCAATTAT	2	D3	TTGGCCTCCGCTGGTCATTCCAATTAT	ATCCTTGTTGAGGGATTTATGCTCAAC	0.222222		------{------(---------)------}	0.000459314	18S ribosomal RNA	PREDICTED: Ochlerotatus camptorhynchus small subunit ribosomal RNA (LOC135717040), rRNA	{'superkingdom': 'Eukaryota', 'phylum': 'Arthropoda', 'class': 'Insecta', 'order': 'Diptera', 'family': 'Culicidae', 'genus': 'Ochlerotatus', 'species': 'Ochlerotatus camptorhynchus'}	Ochlerotatus camptorhynchus
GAATTACCGCGGCGGCGGGCACCAGAC	GAATTACCGCGGCGGCGGGCACCAGACTTGGCCTCCGCTGGATCCTTGTTGAGGGATTTATGCTCAACTCATTCCAATTA	GAATTACCGCGGCGGCGGGCACCAGACTGGGCCTCCACTGGATCCTTACCGAGGGATTTATGCTCGGTTCATTCCAATTAT	1	D3	TTGGCCTCCGCTGGTCATTCCAATTAT	ATCCTTGTTGAGGGATTTATGCTCAAC	0.111111		------{ACC---(---------)---GGT}	0.000459314		PREDICTED: Ochlerotatus camptorhynchus small subunit ribosomal RNA (LOC135717040), rRNA	{'superkingdom': 'Eukaryota', 'phylum': 'Arthropoda', 'class': 'Insecta', 'order': 'Diptera', 'family': 'Culicidae', 'genus': 'Ochlerotatus', 'species': 'Ochlerotatus camptorhynchus'}	Ochlerotatus camptorhynchus
GAATTACCGCGGCGGCGGGCACCAGAC	GAATTACCGCGGCGGCGGGCACCAGACTTGGCCTCCGCTGGATCCTTGTTGAGGGATTTATGCTCAACTCATTCCAATTA	GAATTACCGCGGCGGCGGGCACCAGACTTGCCCTCCGCTGGAGCCTTACCGAAGGATGTATGCTCGGTTCATTCCAATTAT	1	D3	TTGGCCTCCGCTGGTCATTCCAATTAT	ATCCTTGTTGAGGGATTTATGCTCAAC	0.111111		-g----{ACC--a(----g----)---GGT}	0.000459314		PREDICTED: Ochlerotatus camptorhynchus small subunit ribosomal RNA (LOC135717040), rRNA	{'superkingdom': 'Eukaryota', 'phylum': 'Arthropoda', 'class': 'Insecta', 'order': 'Diptera', 'family': 'Culicidae', 'genus': 'Ochlerotatus', 'species': 'Ochlerotatus camptorhynchus'}	Ochlerotatus camptorhynchus
GAATTACCGCGGCGGCGGGCACCAGAC	GAATTACCGCGGCGGCGGGCACCAGACTTGGCCTCCGCTGGATCCTTGTTGAGGGATTTATGCTCAACTCATTCCAATTA	GAATTACCGCGGCGGCGGGCACCAGACTTGCCCTCCTCTTGATCCTTACCGAAGGATGTATGCTCGGTTCATTCCAATTAT	1	D3	TTGGCCTCCGCTGGTCATTCCAATTAT	ATCCTTGTTGAGGGATTTATGCTCAAC	0.111111		------{ACC--a(----g----)---GGT}	0.000459314	18S ribosomal RNA	PREDICTED: Ochlerotatus camptorhynchus small subunit ribosomal RNA (LOC135717040), rRNA	{'superkingdom': 'Eukaryota', 'phylum': 'Arthropoda', 'class': 'Insecta', 'order': 'Diptera', 'family': 'Culicidae', 'genus': 'Ochlerotatus', 'species': 'Ochlerotatus camptorhynchus'}	Ochlerotatus camptorhynchus
GAATTACCGCGGCGGCGGGCACCAGAC	GAATTACCGCGGCGGCGGGCACCAGACTTGGCCTCCGCTGGATCCTTGTTGAGGGATTTATGCTCAACTCATTCCAATTA	GAATTACCGCGGCGGCGGGCACCAGACTTGCCCTGCACTTGATCCTTACCGAGGGATTTATGCTCGGTTGATTCCAATTAT	1	D3	TTGGCCTCCGCTGGTCATTCCAATTAT	ATCCTTGTTGAGGGATTTATGCTCAAC	0.111111		------{ACC---(---------)---GGT}	0.000459314		PREDICTED: Ochlerotatus camptorhynchus small subunit ribosomal RNA (LOC135717040), rRNA	{'superkingdom': 'Eukaryota', 'phylum': 'Arthropoda', 'class': 'Insecta', 'order': 'Diptera', 'family': 'Culicidae', 'genus': 'Ochlerotatus', 'species': 'Ochlerotatus camptorhynchus'}	Ochlerotatus camptorhynchus
GAATTACCGCGGCGGCGGGCACCAGAC	GAATTACCGCGGCGGCGGGCACCAGACTTGGCCTCCGCTGGATCCTTGTTGAGGGATTTATGCTCAACTCATTCCAATTA	GAATTACCGCGGCGGCGGGCACCAGACTTGGCCTCCGCTGGATCCTTACCGAAGGATTTATGCTCGGTTCATTCCAATTAT	1	D3	TTGGCCTCCGCTGGTCATTCCAATTAT	ATCCTTGTTGAGGGATTTATGCTCAAC	0.111111		------{ACC--a(---------)---GGT}	0.000459314		PREDICTED: Ochlerotatus camptorhynchus small subunit ribosomal RNA (LOC135717040), rRNA	{'superkingdom': 'Eukaryota', 'phylum': 'Arthropoda', 'class': 'Insecta', 'order': 'Diptera', 'family': 'Culicidae', 'genus': 'Ochlerotatus', 'species': 'Ochlerotatus camptorhynchus'}	Ochlerotatus camptorhynchus
CCATCGACTACGCCTGTCGGCCTCGCC	CCATCGACTACGCCTGTCGGCCTCGCCTTAGGACCCGACTCACCCAGGGCAGACAAACTTGACCCTGGAACCCTTGGATA	CCATCGACTACGCCTGTCGGCCTCGCCTTAGGACCCGACTCACCCTGGGAAGACGAACTTGACCCAGGAACCCTTAGTCAT	2	D3	TTAGGACCCGACTCAACCCTTGGATAA	ACCCAGGGCAGACAAACTTGACCCTGG	0.333333		--{--T---(a----g-------)---A--}	0.000540736	23S ribosomal RNA	Cutibacterium acnes subsp. defendens strain 11-79 chromosome, complete genome	{'superkingdom': 'Bacteria', 'phylum': 'Actinomycetota', 'class': 'Actinomycetes', 'order': 'Propionibacteriales', 'family': 'Propionibacteriaceae', 'genus': 'Cutibacterium', 'species': 'Cutibacterium acnes'}	Cutibacterium acnes
CCATCGACTACGCCTGTCGGCCTCGCC	CCATCGACTACGCCTGTCGGCCTCGCCTTAGGACCCGACTCACCCAGGGCAGACAAACTTGACCCTGGAACCCTTGGATA	CCATCGACTACGCCTGTCGGCCTCGCCTTAGGACCCGACTCACCCTGGGAAGACGAACTTGACCCAGGAACCCTTCGAGAT	2	D3	TTAGGACCCGACTCAACCCTTGGATAA	ACCCAGGGCAGACAAACTTGACCCTGG	0.333333		--{--T---(a----g-------)---A--}	0.000540736	23S ribosomal RNA	Cutibacterium acnes subsp. defendens strain 11-79 chromosome, complete genome	{'superkingdom': 'Bacteria', 'phylum': 'Actinomycetota', 'class': 'Actinomycetes', 'order': 'Propionibacteriales', 'family': 'Propionibacteriaceae', 'genus': 'Cutibacterium', 'species': 'Cutibacterium acnes'}	Cutibacterium acnes
CCATCGACTACGCCTGTCGGCCTCGCC	CCATCGACTACGCCTGTCGGCCTCGCCTTAGGACCCGACTCACCCAGGGCAGACAAACTTGACCCTGGAACCCTTGGATA	CCATCGACTACGCCTGTCGGCCTCGCCTTAGGCCCCGACTAACCCAGGGCAGATTAACTTGACCCTGGAACCCTTGATCAT	2	D3	TTAGGACCCGACTCAACCCTTGGATAA	ACCCAGGGCAGACAAACTTGACCCTGG	0.333333		--{------(----tt-------)------}	0.000540736	23S ribosomal RNA	Cutibacterium acnes subsp. defendens strain 11-79 chromosome, complete genome	{'superkingdom': 'Bacteria', 'phylum': 'Actinomycetota', 'class': 'Actinomycetes', 'order': 'Propionibacteriales', 'family': 'Propionibacteriaceae', 'genus': 'Cutibacterium', 'species': 'Cutibacterium acnes'}	Cutibacterium acnes
AGTGGAGCTGGAATTAGCGCGGCTGCT	AGTGGAGCTGGAATTAGCGCGGCTGCTGGCACCAGACTTGCCCTCCACTTGATCCTTGTTGAAGGATTTATGCTCAACTCA	AGTGGAGCTGGAATTAGCGCGGCTGCTGGCACCAGACTTGCCCTCCACTTGATCCTTACCGAAGGATTTATGCTCGGTTCA	7	D1	GGCACCAGACTTGCCCTCCACTTGATCC	TTGTTGAAGGATTTATGCTCAACTCA	0.777778		--{ACC--(-----------)--GGT}---	0.000629918	18S ribosomal RNA	Aedes notoscriptus isolate MI1108 nuclear ribosomal DNA repeat unit genomic sequence	{'superkingdom': 'Eukaryota', 'phylum': 'Arthropoda', 'class': 'Insecta', 'order': 'Diptera', 'family': 'Culicidae', 'genus': 'Aedes', 'species': 'Aedes notoscriptus'}	Aedes notoscriptus
AGTGGAGCTGGAATTAGCGCGGCTGCT	AGTGGAGCTGGAATTAGCGCGGCTGCTGGCACCAGACTTGCCCTCCACTTGATCCTTGTTGAAGGATTTATGCTCAACTCA	AGTGGAGCTGGAATTAGCGCGGCTGCTGGCACCAGACTTGCCCAGAACTTGATGCTTGTTGAAGGATTTATGCTCAACTCA	1	D1	GGCACCAGACTTGCCCTCCACTTGATCC	TTGTTGAAGGATTTATGCTCAACTCA	0.111111		--{-----(-----------)-----}---	0.000629918		Aedes notoscriptus isolate MI1108 nuclear ribosomal DNA repeat unit genomic sequence	{'superkingdom': 'Eukaryota', 'phylum': 'Arthropoda', 'class': 'Insecta', 'order': 'Diptera', 'family': 'Culicidae', 'genus': 'Aedes', 'species': 'Aedes notoscriptus'}	Aedes notoscriptus
AGTGGAGCTGGAATTAGCGCGGCTGCT	AGTGGAGCTGGAATTAGCGCGGCTGCTGGCACCAGACTTGCCCTCCACTTGATCCTTGTTGAAGGATTTATGCTCAACTCA	AGTGGAGCTGGAATTAGCGCGGCTGCTGGCACCAGACTTGCCCTCCACTTGATCCTTACCGAAGGATTTCTGCGGGGTGCG	1	D1	GGCACCAGACTTGCCCTCCACTTGATCC	TTGTTGAAGGATTTATGCTCAACTCA	0.111111		--{ACC--(-------c---)ggGGT}g-g	0.000629918	18S ribosomal RNA	Aedes notoscriptus isolate MI1108 nuclear ribosomal DNA repeat unit genomic sequence	{'superkingdom': 'Eukaryota', 'phylum': 'Arthropoda', 'class': 'Insecta', 'order': 'Diptera', 'family': 'Culicidae', 'genus': 'Aedes', 'species': 'Aedes notoscriptus'}	Aedes notoscriptus
CGGCCTCGCCTTAGGGGTCGACTCACC	CGGCCTCGCCTTAGGGGTCGACTCACCCAGGGAAGACAACCTTTACCCTGGAAACCTTACATTTTCGGCGGGAAGGGATC	CGGCCTCGCCTTAGGGGTCGACTCACCCTGCCCCGATTAACGTTGGACAGGAACCCTTGGTCTTCCGGCGAGCGGGCTTTT	2	D1	CAGGGAAGACAACCTTTACCCTGGAAAC	CTTACATTTTCGGCGGGAAGGGATCT	0.333333	{-T-cC(cc--tt-a-g--g)Ga-A-}---c-		0.000896088	23S ribosomal RNA	Entomospira culicis strain BR149 chromosome, complete genome	{'superkingdom': 'Bacteria', 'phylum': 'Spirochaetota', 'class': 'Spirochaetia', 'order': 'Spirochaetales', 'family': 'Spirochaetaceae', 'genus': 'Entomospira', 'species': 'Entomospira culicis'}	Entomospira culicis
CGGCCTCGCCTTAGGGGTCGACTCACC	CGGCCTCGCCTTAGGGGTCGACTCACCCAGGGAAGACAACCTTTACCCTGGAAACCTTACATTTTCGGCGGGAAGGGATC	CGGCCTCGCCTTAGGGGTCGACTCACCCTGCCCCGATTAACGTTGGACAGGAACCCTTGGTCTTCCGGCGTGCGGGTTTTT	2	D1	CAGGGAAGACAACCTTTACCCTGGAAAC	CTTACATTTTCGGCGGGAAGGGATCT	0.333333	{-T-cC(cc--tt-a-g--g)Ga-A-}---c-		0.000896088	23S ribosomal RNA	Entomospira culicis strain BR149 chromosome, complete genome	{'superkingdom': 'Bacteria', 'phylum': 'Spirochaetota', 'class': 'Spirochaetia', 'order': 'Spirochaetales', 'family': 'Spirochaetaceae', 'genus': 'Entomospira', 'species': 'Entomospira culicis'}	Entomospira culicis
CGGCCTCGCCTTAGGGGTCGACTCACC	CGGCCTCGCCTTAGGGGTCGACTCACCCAGGGAAGACAACCTTTACCCTGGAAACCTTACATTTTCGGCGGGAAGGGATC	CGGCCTCGCCTTAGGGGTCGACTCACCCAGCCCCGATTAACGTTGGACTGGAACCCTTGGTCTTTCAGCGTGCGAGTTTTT	1	D1	CAGGGAAGACAACCTTTACCCTGGAAAC	CTTACATTTTCGGCGGGAAGGGATCT	0.166667	{---cC(cc--tt-a-g--g)Ga---}---c-		0.000896088	23S ribosomal RNA	Entomospira culicis strain BR149 chromosome, complete genome	{'superkingdom': 'Bacteria', 'phylum': 'Spirochaetota', 'class': 'Spirochaetia', 'order': 'Spirochaetales', 'family': 'Spirochaetaceae', 'genus': 'Entomospira', 'species': 'Entomospira culicis'}	Entomospira culicis
CGGCCTCGCCTTAGGGGTCGACTCACC	CGGCCTCGCCTTAGGGGTCGACTCACCCAGGGAAGACAACCTTTACCCTGGAAACCTTACATTTTCGGCGGGAAGGGATC	CGGCCTCGCCTTAGGGGTCGACTCACCCTGCTCCGATTGACGTCGAACAGGAACCCTTGGTCTTCCGGCGGGGGAGGTTTT	1	D1	CAGGGAAGACAACCTTTACCCTGGAAAC	CTTACATTTTCGGCGGGAAGGGATCT	0.166667	{-T-cT(cc--ttga-g-cg)Aa-A-}---c-		0.000896088		Entomospira culicis strain BR149 chromosome, complete genome	{'superkingdom': 'Bacteria', 'phylum': 'Spirochaetota', 'class': 'Spirochaetia', 'order': 'Spirochaetales', 'family': 'Spirochaetaceae', 'genus': 'Entomospira', 'species': 'Entomospira culicis'}	Entomospira culicis
TTACCGCGGCTGATGGCACCAGACTTG	TTACCGCGGCTGATGGCACCAGACTTGCCCTCCACTTGATCCTTACCGAAGGATTTATGCTCGGTTCATTCCAATTATAA	TTACCGCGGCTGATGGCACCAGACTTGCCCTCCACTTGATCCTTGTTGAAGGATTTATGCTCAACTCATTCCAATTATAAG	3	D3	CCCTCCACTTGATCTTCCAATTATAAA	CTTACCGAAGGATTTATGCTCGGTTCA	0.375		---{GTT--(-----------)--AAC}---	0.000950749	18S ribosomal RNA	Culex tritaeniorhynchus isolate MG_S115 small subunit ribosomal RNA, partial sequence	{'superkingdom': 'Eukaryota', 'phylum': 'Arthropoda', 'class': 'Insecta', 'order': 'Diptera', 'family': 'Culicidae', 'genus': 'Culex', 'species': 'Culex tritaeniorhynchus'}	Culex tritaeniorhynchus
TTACCGCGGCTGATGGCACCAGACTTG	TTACCGCGGCTGATGGCACCAGACTTGCCCTCCACTTGATCCTTACCGAAGGATTTATGCTCGGTTCATTCCAATTATAA	TTACCGCGGCTGATGGCACCAGACTTGACATCCACTTGATCATTGTTGAAGGATTTATGCTCAACTCATTCCAATTATAAG	1	D3	CCCTCCACTTGATCTTCCAATTATAAA	CTTACCGAAGGATTTATGCTCGGTTCA	0.125		a--{GTT--(-----------)--AAC}---	0.000950749		Culex tritaeniorhynchus isolate MG_S115 small subunit ribosomal RNA, partial sequence	{'superkingdom': 'Eukaryota', 'phylum': 'Arthropoda', 'class': 'Insecta', 'order': 'Diptera', 'family': 'Culicidae', 'genus': 'Culex', 'species': 'Culex tritaeniorhynchus'}	Culex tritaeniorhynchus
TTACCGCGGCTGATGGCACCAGACTTG	TTACCGCGGCTGATGGCACCAGACTTGCCCTCCACTTGATCCTTACCGAAGGATTTATGCTCGGTTCATTCCAATTATAA	TTACCGCGGCTGATGGCACCAGACTTGCACTCCACTTGATCCTAGTTGAATGATTTATGATCAACTAAATCCAATTATAAG	1	D3	CCCTCCACTTGATCTTCCAATTATAAA	CTTACCGAAGGATTTATGCTCGGTTCA	0.125		--a{GTT--(-t--------a)--AAC}-a-	0.000950749		Culex tritaeniorhynchus isolate MG_S115 small subunit ribosomal RNA, partial sequence	{'superkingdom': 'Eukaryota', 'phylum': 'Arthropoda', 'class': 'Insecta', 'order': 'Diptera', 'family': 'Culicidae', 'genus': 'Culex', 'species': 'Culex tritaeniorhynchus'}	Culex tritaeniorhynchus
TTACCGCGGCTGATGGCACCAGACTTG	TTACCGCGGCTGATGGCACCAGACTTGCCCTCCACTTGATCCTTACCGAAGGATTTATGCTCGGTTCATTCCAATTATAA	TTACCGCGGCTGATGGCACCAGACTTGCCCTCCACTTGATCCTTACCGAAGGATTTATGCTCGGTTCATTAGATCGGAAGA	1	D3	CCCTCCACTTGATCTTCCAATTATAAA	CTTACCGAAGGATTTATGCTCGGTTCA	0.125		---{-----(-----------)-----}---	0.000950749		Culex tritaeniorhynchus isolate MG_S115 small subunit ribosomal RNA, partial sequence	{'superkingdom': 'Eukaryota', 'phylum': 'Arthropoda', 'class': 'Insecta', 'order': 'Diptera', 'family': 'Culicidae', 'genus': 'Culex', 'species': 'Culex tritaeniorhynchus'}	Culex tritaeniorhynchus
TTACCGCGGCTGATGGCACCAGACTTG	TTACCGCGGCTGATGGCACCAGACTTGCCCTCCACTTGATCCTTACCGAAGGATTTATGCTCGGTTCATTCCAATTATAA	TTACCGCGGCTGATGGCACCAGACTTGCCCTCCACTTGATCCTTGTTGAAGGATTTATTCTCAACTCATACCAAATATAAT	1	D3	CCCTCCACTTGATCTTCCAATTATAAA	CTTACCGAAGGATTTATGCTCGGTTCA	0.125		---{GTT--(---------t-)--AAC}---	0.000950749	18S ribosomal RNA	Culex tritaeniorhynchus isolate MG_S115 small subunit ribosomal RNA, partial sequence	{'superkingdom': 'Eukaryota', 'phylum': 'Arthropoda', 'class': 'Insecta', 'order': 'Diptera', 'family': 'Culicidae', 'genus': 'Culex', 'species': 'Culex tritaeniorhynchus'}	Culex tritaeniorhynchus
TTACCGCGGCTGATGGCACCAGACTTG	TTACCGCGGCTGATGGCACCAGACTTGCCCTCCACTTGATCCTTACCGAAGGATTTATGCTCGGTTCATTCCAATTATAA	TTACCGCGGCTGATGGCACCAGACTTGCCCTCCTCTTGATAATTACCGAATGATTTATGCTCGGTTCATTCCAATTATAAA	1	D3	CCCTCCACTTGATCTTCCAATTATAAA	CTTACCGAAGGATTTATGCTCGGTTCA	0.125		a--{-----(-t---------)-----}---	0.000950749		Culex tritaeniorhynchus isolate MG_S115 small subunit ribosomal RNA, partial sequence	{'superkingdom': 'Eukaryota', 'phylum': 'Arthropoda', 'class': 'Insecta', 'order': 'Diptera', 'family': 'Culicidae', 'genus': 'Culex', 'species': 'Culex tritaeniorhynchus'}	Culex tritaeniorhynchus
TCCAGTGTGGCTGGTCATCCTCTCAGA	TCCAGTGTGGCTGGTCATCCTCTCAGACCAGCTAGGGATCGTCGCCTAGGTAAGCCATTACCCTACCTACTAGCTAATCC	TCCAGTGTGGCTGGTCATCCTCTCAGACCAGCTAGAGATCGTCGCCTAGGTGGGCCTTTACCCCGCCTACTAGCTAATCCC	3	D3	CCAGCTAGGGATCGACTAGCTAATCCC	TCGCCTAGGTAAGCCATTACCCTACCT	0.6	--{------(a------)------}------	------{----G(g---t------)Cg---}	0.00104591	16S ribosomal RNA	Rosenbergiella sp. strain Z21 16S ribosomal RNA gene, partial sequence	{'superkingdom': 'Bacteria', 'phylum': 'Pseudomonadota', 'class': 'Gammaproteobacteria', 'order': 'Enterobacterales', 'family': 'Erwiniaceae', 'genus': 'Rosenbergiella', 'species': 'Rosenbergiella sp.'}	Rosenbergiella sp.
TCCAGTGTGGCTGGTCATCCTCTCAGA	TCCAGTGTGGCTGGTCATCCTCTCAGACCAGCTAGGGATCGTCGCCTAGGTAAGCCATTACCCTACCTACTAGCTAATCC	TCCAGTGTGGCTGGTCATCCTCTCAGACCAGCTAGGGATCGTCGCCTAGGTGAGCCATTACCCCACCACTAGCTAATCCCA	1	D3	CCAGCTAGGGATCGACTAGCTAATCCC	TCGCCTAGGTAAGCCATTACCCTACCT	0.2	--{------(------c)tagcta}-tc--a	------{----G(-----------)C---a}	0.00104591	16S ribosomal RNA	Rosenbergiella sp. strain Z21 16S ribosomal RNA gene, partial sequence	{'superkingdom': 'Bacteria', 'phylum': 'Pseudomonadota', 'class': 'Gammaproteobacteria', 'order': 'Enterobacterales', 'family': 'Erwiniaceae', 'genus': 'Rosenbergiella', 'species': 'Rosenbergiella sp.'}	Rosenbergiella sp.
TCCAGTGTGGCTGGTCATCCTCTCAGA	TCCAGTGTGGCTGGTCATCCTCTCAGACCAGCTAGGGATCGTCGCCTAGGTAAGCCATTACCCTACCTACTAGCTAATCC	TCCAGTGTGGCTGGTCATCCTCTCAGACCAGCTAGGGATCGTCGCCTAGGTGAGCCATTACCTCACCTACAAGCTAATCCC	1	D3	CCAGCTAGGGATCGACTAGCTAATCCC	TCGCCTAGGTAAGCCATTACCCTACCT	0.2	--{------(-------)-a----}------	------{----G(----------t)C----}	0.00104591	16S ribosomal RNA	Rosenbergiella sp. strain Z21 16S ribosomal RNA gene, partial sequence	{'superkingdom': 'Bacteria', 'phylum': 'Pseudomonadota', 'class': 'Gammaproteobacteria', 'order': 'Enterobacterales', 'family': 'Erwiniaceae', 'genus': 'Rosenbergiella', 'species': 'Rosenbergiella sp.'}	Rosenbergiella sp.
GTAGCGCGCGTGCGGCCCAGGACATCT	GTAGCGCGCGTGCGGCCCAGGACATCTAAGGGCATCACAGACCTGTTATTGCCTCAAACTTCCTTATGCTTGCACATAAA	GTAGCGCGCGTGCGGCCCAGGACATCTAAGGGCATCACAGACCTGTTATTGCCTCCAACTTCCTTTGGTTAGTCACCAAAA	3	D1	AAGGGCATCACAGACCTGTTATTGCCTC	AAACTTCCTTATGCTTGCACATAAAG	0.230769		c-------{--tG-(t-a-tc)aCc--}-a	0.00130117	18S ribosomal RNA	Colpoda reniformis isolate PXM20211001 small subunit ribosomal RNA gene, partial sequence	{'superkingdom': 'Eukaryota', 'phylum': 'Ciliophora', 'class': 'Colpodea', 'order': 'Colpodida', 'family': 'Colpodidae', 'genus': 'Colpoda', 'species': 'Colpoda reniformis'}	Colpoda reniformis
GTAGCGCGCGTGCGGCCCAGGACATCT	GTAGCGCGCGTGCGGCCCAGGACATCTAAGGGCATCACAGACCTGTTATTGCCTCAAACTTCCTTATGCTTGCACATAAA	GTAGCGCGCGTGCGGCCCAGGACATCTAAGGGCATCACAGACCTGTTATTGCCTCAAACTTCCATCGGCTTGAGCCGATAG	2	D1	AAGGGCATCACAGACCTGTTATTGCCTC	AAACTTCCTTATGCTTGCACATAAAG	0.153846		--------{A-CG-(----ag)-CG-T}--	0.00130117	18S ribosomal RNA	Colpoda reniformis isolate PXM20211001 small subunit ribosomal RNA gene, partial sequence	{'superkingdom': 'Eukaryota', 'phylum': 'Ciliophora', 'class': 'Colpodea', 'order': 'Colpodida', 'family': 'Colpodidae', 'genus': 'Colpoda', 'species': 'Colpoda reniformis'}	Colpoda reniformis
GTAGCGCGCGTGCGGCCCAGGACATCT	GTAGCGCGCGTGCGGCCCAGGACATCTAAGGGCATCACAGACCTGTTATTGCCTCAAACTTCCTTATGCTTGCACATAAA	GTAGCGCGCGTGCGGCCCAGGACATCTAAGGGCATCACAGACCTGTTATTGCTCAATCTCGTGCGGCTCGAAGCCGCCGGT	2	D1	AAGGGCATCACAGACCTGTTATTGCCTC	AAACTTCCTTATGCTTGCACATAAAG	0.153846		-tctcgtg{CGGCt(-gaagc)-GCCG}gt	0.00130117	18S ribosomal RNA	Colpoda reniformis isolate PXM20211001 small subunit ribosomal RNA gene, partial sequence	{'superkingdom': 'Eukaryota', 'phylum': 'Ciliophora', 'class': 'Colpodea', 'order': 'Colpodida', 'family': 'Colpodidae', 'genus': 'Colpoda', 'species': 'Colpoda reniformis'}	Colpoda reniformis
GTAGCGCGCGTGCGGCCCAGGACATCT	GTAGCGCGCGTGCGGCCCAGGACATCTAAGGGCATCACAGACCTGTTATTGCCTCAAACTTCCTTATGCTTGCACATAAA	GTAGCGCGCGTGCGGCCCAGGACATCTAAGGGCAGGAGGGACCTGTTATCGCTCAATCTCAGTTTGGTGAACACAAATTGT	1	D1	AAGGGCATCACAGACCTGTTATTGCCTC	AAACTTCCTTATGCTTGCACATAAAG	0.0769231		-tctcagt{--ggT(gaacac)A-att}gt	0.00130117		Colpoda reniformis isolate PXM20211001 small subunit ribosomal RNA gene, partial sequence	{'superkingdom': 'Eukaryota', 'phylum': 'Ciliophora', 'class': 'Colpodea', 'order': 'Colpodida', 'family': 'Colpodidae', 'genus': 'Colpoda', 'species': 'Colpoda reniformis'}	Colpoda reniformis
GTAGCGCGCGTGCGGCCCAGGACATCT	GTAGCGCGCGTGCGGCCCAGGACATCTAAGGGCATCACAGACCTGTTATTGCCTCAAACTTCCTTATGCTTGCACATAAA	GTAGCGCGCGTGCGGCCCAGGACATCTAAGGGCATCACAGACCTGTTATTGCCTAGTGCCTCCACATCCTAATGTGGATGC	1	D1	AAGGGCATCACAGACCTGTTATTGCCTC	AAACTTCCTTATGCTTGCACATAAAG	0.0769231		gtg-c---{Ac--c(--aatg)tgg-T}gc	0.00130117	18S ribosomal RNA	Colpoda reniformis isolate PXM20211001 small subunit ribosomal RNA gene, partial sequence	{'superkingdom': 'Eukaryota', 'phylum': 'Ciliophora', 'class': 'Colpodea', 'order': 'Colpodida', 'family': 'Colpodidae', 'genus': 'Colpoda', 'species': 'Colpoda reniformis'}	Colpoda reniformis
GTAGCGCGCGTGCGGCCCAGGACATCT	GTAGCGCGCGTGCGGCCCAGGACATCTAAGGGCATCACAGACCTGTTATTGCCTCAAACTTCCTTATGCTTGCACATAAA	GTAGCGCGCGTGCGGCCCAGGACATCTAAGGGCATCACAGACCTGTTATTGCCTGACACCTCCACCCACTATAGCGCGGGC	1	D1	AAGGGCATCACAGACCTGTTATTGCCTC	AAACTTCCTTATGCTTGCACATAAAG	0.0769231		-c--c---{aCcCa(--atag)-GcGg}gc	0.00130117	18S ribosomal RNA	Colpoda reniformis isolate PXM20211001 small subunit ribosomal RNA gene, partial sequence	{'superkingdom': 'Eukaryota', 'phylum': 'Ciliophora', 'class': 'Colpodea', 'order': 'Colpodida', 'family': 'Colpodidae', 'genus': 'Colpoda', 'species': 'Colpoda reniformis'}	Colpoda reniformis
GTAGCGCGCGTGCGGCCCAGGACATCT	GTAGCGCGCGTGCGGCCCAGGACATCTAAGGGCATCACAGACCTGTTATTGCCTCAAACTTCCTTATGCTTGCACATAAA	GTAGCGCGCGTGCGGCCCAGGACATCTAAGGGCATCACAGACCTGTTATTGCCTGACACCTCCACCCACTGAAACGCGGGC	1	D1	AAGGGCATCACAGACCTGTTATTGCCTC	AAACTTCCTTATGCTTGCACATAAAG	0.0769231		-c--c---{aCcCa(--gaa-)-GcGg}gc	0.00130117	18S ribosomal RNA	Colpoda reniformis isolate PXM20211001 small subunit ribosomal RNA gene, partial sequence	{'superkingdom': 'Eukaryota', 'phylum': 'Ciliophora', 'class': 'Colpodea', 'order': 'Colpodida', 'family': 'Colpodidae', 'genus': 'Colpoda', 'species': 'Colpoda reniformis'}	Colpoda reniformis
GTAGCGCGCGTGCGGCCCAGGACATCT	GTAGCGCGCGTGCGGCCCAGGACATCTAAGGGCATCACAGACCTGTTATTGCCTCAAACTTCCTTATGCTTGCACATAAA	GTAGCGCGCGTGCGGCCCAGGACATCTAAGGGCATCACAGACCTGTTATTGCTCAATCTCATTATTGTTAGACACAATTTG	1	D1	AAGGGCATCACAGACCTGTTATTGCCTC	AAACTTCCTTATGCTTGCACATAAAG	0.0769231		-tctcatt{A-Tgt(taga--)--AtT}t-	0.00130117	18S ribosomal RNA	Colpoda reniformis isolate PXM20211001 small subunit ribosomal RNA gene, partial sequence	{'superkingdom': 'Eukaryota', 'phylum': 'Ciliophora', 'class': 'Colpodea', 'order': 'Colpodida', 'family': 'Colpodidae', 'genus': 'Colpoda', 'species': 'Colpoda reniformis'}	Colpoda reniformis
GTAGCGCGCGTGCGGCCCAGGACATCT	GTAGCGCGCGTGCGGCCCAGGACATCTAAGGGCATCACAGACCTGTTATTGCCTCAAACTTCCTTATGCTTGCACATAAA	GTAGCGCGCGTGCGGCCCAGGACATCTAAGGGCATCACAGACCTGTTATTGCTCAATCTCGGGTGGCTGAACGCGACTTGT	1	D1	AAGGGCATCACAGACCTGTTATTGCCTC	AAACTTCCTTATGCTTGCACATAAAG	0.0769231		-tctcggg{-gGct(gaacgc)g-Ctt}gt	0.00130117	18S ribosomal RNA	Colpoda reniformis isolate PXM20211001 small subunit ribosomal RNA gene, partial sequence	{'superkingdom': 'Eukaryota', 'phylum': 'Ciliophora', 'class': 'Colpodea', 'order': 'Colpodida', 'family': 'Colpodidae', 'genus': 'Colpoda', 'species': 'Colpoda reniformis'}	Colpoda reniformis
CATGATGACTTGACGTCGTCCCCACCT	CATGATGACTTGACGTCGTCCCCACCTTCCTCCGGTTTGTCACCGGCAGTCTCCTTAGAGTTCCCGACCGAATCGCTGGC	CATGATGACTTGACGTCGTCCCCACCTTCCTCCGGTTTGTCACCGGCAGTCTCGCTAGAGTGCCCAGCATTACCTGATGGC	4	D1	TCCTCCGGTTTGTCACCGGCAGTCTCCT	TAGAGTTCCCGACCGAATCGCTGGCA	0.363636	----{-----(-----)-----}-------gc		0.0015372	16S ribosomal RNA	Salinicola lusitanus strain LLJ914 chromosome, complete genome	{'superkingdom': 'Bacteria', 'phylum': 'Pseudomonadota', 'class': 'Gammaproteobacteria', 'order': 'Oceanospirillales', 'family': 'Halomonadaceae', 'genus': 'Salinicola', 'species': 'Salinicola lusitanus'}	Salinicola lusitanus
CATGATGACTTGACGTCGTCCCCACCT	CATGATGACTTGACGTCGTCCCCACCTTCCTCCGGTTTGTCACCGGCAGTCTCCTTAGAGTTCCCGACCGAATCGCTGGC	CATGATGACTTGACGTCGTCCCCACCTTCCTCCGAGTTGACCCCGGCAGTCTCCCCAGAGTGCCCAACTTAATGATGGCAA	3	D1	TCCTCCGGTTTGTCACCGGCAGTCTCCT	TAGAGTTCCCGACCGAATCGCTGGCA	0.272727	----{---aG(---a-)C----}--------c		0.0015372	16S ribosomal RNA	Salinicola lusitanus strain LLJ914 chromosome, complete genome	{'superkingdom': 'Bacteria', 'phylum': 'Pseudomonadota', 'class': 'Gammaproteobacteria', 'order': 'Oceanospirillales', 'family': 'Halomonadaceae', 'genus': 'Salinicola', 'species': 'Salinicola lusitanus'}	Salinicola lusitanus
CATGATGACTTGACGTCGTCCCCACCT	CATGATGACTTGACGTCGTCCCCACCTTCCTCCGGTTTGTCACCGGCAGTCTCCTTAGAGTTCCCGACCGAATCGCTGGC	CATGATGACTTGACGTCGTCCCCACCTTCCTCCGAGTTGACCCCGGCAGTCTCCCACGAGTCCCCGGCATTACCCGCTAGA	2	D1	TCCTCCGGTTTGTCACCGGCAGTCTCCT	TAGAGTTCCCGACCGAATCGCTGGCA	0.181818	----{---aG(---a-)C----}--------c		0.0015372	16S ribosomal RNA	Salinicola lusitanus strain LLJ914 chromosome, complete genome	{'superkingdom': 'Bacteria', 'phylum': 'Pseudomonadota', 'class': 'Gammaproteobacteria', 'order': 'Oceanospirillales', 'family': 'Halomonadaceae', 'genus': 'Salinicola', 'species': 'Salinicola lusitanus'}	Salinicola lusitanus
CATGATGACTTGACGTCGTCCCCACCT	CATGATGACTTGACGTCGTCCCCACCTTCCTCCGGTTTGTCACCGGCAGTCTCCTTAGAGTTCCCGACCGAATCGCTGGC	CATGATGACTTGACGTCGTCCCCACCTTCCTCCGAGTTGACCCCGGCAGTCTCCCATGAGTTCCCGGCCGAACCGCTGGCA	2	D1	TCCTCCGGTTTGTCACCGGCAGTCTCCT	TAGAGTTCCCGACCGAATCGCTGGCA	0.181818	----{---aG(---a-)C----}--------c		0.0015372	16S ribosomal RNA	Salinicola lusitanus strain LLJ914 chromosome, complete genome	{'superkingdom': 'Bacteria', 'phylum': 'Pseudomonadota', 'class': 'Gammaproteobacteria', 'order': 'Oceanospirillales', 'family': 'Halomonadaceae', 'genus': 'Salinicola', 'species': 'Salinicola lusitanus'}	Salinicola lusitanus
CCCGGTGTGGCTGATCATCCTCTCAGA	CCCGGTGTGGCTGATCATCCTCTCAGACCAGCTAGGGATCGTCGCCTAGGTGAGCCATTACCCCACCTACTAGCTAATCC	CCCGGTGTGGCTGATCATCCTCTCAGACCAGCTACAGATCGTTGCCTTGGTAAGCCATTACCCTACCAACTAGCTAATCTG	10	D3	CCAGCTAGGGATCGACTAGCTAATCCC	TCGCCTAGGTGAGCCATTACCCCACCT	0.416667	--{-----c(a------)------}----tg	-t----{T---A(-----------)T---A}	0.00283994	16S ribosomal RNA	Uncultured Providencia sp. clone ORF_084L 16S ribosomal RNA gene, partial sequence	{'superkingdom': 'Bacteria', 'phylum': 'Pseudomonadota', 'class': 'Gammaproteobacteria', 'order': 'Enterobacterales', 'family': 'Morganellaceae', 'genus': 'Providencia', 'species': 'uncultured Providencia sp.'}	uncultured Providencia sp.
CCCGGTGTGGCTGATCATCCTCTCAGA	CCCGGTGTGGCTGATCATCCTCTCAGACCAGCTAGGGATCGTCGCCTAGGTGAGCCATTACCCCACCTACTAGCTAATCC	CCCGGTGTGGCTGATCATCCTCTCAGACCAGCTATGGATCGTTGCCTTGGTGAGCCATTACCTCACCAACTAGCTAATCCA	10	D3	CCAGCTAGGGATCGACTAGCTAATCCC	TCGCCTAGGTGAGCCATTACCCCACCT	0.416667	--{-----t(-------)------}-----a	-t----{T----(----------t)----A}	0.00283994	16S ribosomal RNA	Uncultured Providencia sp. clone ORF_084L 16S ribosomal RNA gene, partial sequence	{'superkingdom': 'Bacteria', 'phylum': 'Pseudomonadota', 'class': 'Gammaproteobacteria', 'order': 'Enterobacterales', 'family': 'Morganellaceae', 'genus': 'Providencia', 'species': 'uncultured Providencia sp.'}	uncultured Providencia sp.
CCCGGTGTGGCTGATCATCCTCTCAGA	CCCGGTGTGGCTGATCATCCTCTCAGACCAGCTAGGGATCGTCGCCTAGGTGAGCCATTACCCCACCTACTAGCTAATCC	CCCGGTGTGGCTGATCATCCTCTCAGACCAGCTATCGATCATCGCCTTGGTAGGCCTTTACCCCACCAACAAGCTAATCGA	4	D3	CCAGCTAGGGATCGACTAGCTAATCCC	TCGCCTAGGTGAGCCATTACCCCACCT	0.166667	--{-----t(c----a-)-a----}----ga	------{T---a(g---t------)----A}	0.00283994	16S ribosomal RNA	Uncultured Providencia sp. clone ORF_084L 16S ribosomal RNA gene, partial sequence	{'superkingdom': 'Bacteria', 'phylum': 'Pseudomonadota', 'class': 'Gammaproteobacteria', 'order': 'Enterobacterales', 'family': 'Morganellaceae', 'genus': 'Providencia', 'species': 'uncultured Providencia sp.'}	uncultured Providencia sp.
CCCACACTACCATCGGCGCTACGGCGT	CCCACACTACCATCGGCGCTACGGCGTTTCACTGCTGAGTTCGGCATGGGGTCAGGTGGGACCACCGCGCTATTAGATCGG	CCCACACTACCATCGGCGCTACGGCGTTTCACTGCTGAGTTCGGCATGGGGTCAGGTGGGACCACCGCGCTATTGCCGAGA	5	D3	TTCACTGCTGAGTTGCTATTAGATCGG	CGGCATGGGGTCAGGTGGGACCACCGC	0.277778		-------------{-----(--)-----}--	0.00312101	5S ribosomal RNA	Providencia stuartii strain CAVP450 chromosome, complete genome	{'superkingdom': 'Bacteria', 'phylum': 'Pseudomonadota', 'class': 'Gammaproteobacteria', 'order': 'Enterobacterales', 'family': 'Morganellaceae', 'genus': 'Providencia', 'species': 'Providencia stuartii'}	Providencia stuartii
CCCACACTACCATCGGCGCTACGGCGT	CCCACACTACCATCGGCGCTACGGCGTTTCACTGCTGAGTTCGGCATGGGGTCAGGTGGGACCACCGCGCTATTAGATCGG	CCCACACTACCATCGGCGCTACGGCGTTTCACTGCTGAGTTCGGCATGGGGTCAGGTGGGACCACCGCGCTAGATCGGAAG	4	D3	TTCACTGCTGAGTTGCTATTAGATCGG	CGGCATGGGGTCAGGTGGGACCACCGC	0.222222		-------------{-----(--)-----}--	0.00312101	5S ribosomal RNA	Providencia stuartii strain CAVP450 chromosome, complete genome	{'superkingdom': 'Bacteria', 'phylum': 'Pseudomonadota', 'class': 'Gammaproteobacteria', 'order': 'Enterobacterales', 'family': 'Morganellaceae', 'genus': 'Providencia', 'species': 'Providencia stuartii'}	Providencia stuartii
CCCACACTACCATCGGCGCTACGGCGT	CCCACACTACCATCGGCGCTACGGCGTTTCACTGCTGAGTTCGGCATGGGGTCAGGTGGGACCACCGCGCTATTAGATCGG	CCCACACTACCATCGGCGCTACGGCGTTTCACTGCTGAGTTCGGCATGGGGTCAGGTGGGACCACCGCGCTATAGATCGGA	3	D3	TTCACTGCTGAGTTGCTATTAGATCGG	CGGCATGGGGTCAGGTGGGACCACCGC	0.166667		-------------{-----(--)-----}--	0.00312101	5S ribosomal RNA	Providencia stuartii strain CAVP450 chromosome, complete genome	{'superkingdom': 'Bacteria', 'phylum': 'Pseudomonadota', 'class': 'Gammaproteobacteria', 'order': 'Enterobacterales', 'family': 'Morganellaceae', 'genus': 'Providencia', 'species': 'Providencia stuartii'}	Providencia stuartii
CCCACACTACCATCGGCGCTACGGCGT	CCCACACTACCATCGGCGCTACGGCGTTTCACTGCTGAGTTCGGCATGGGGTCAGGTGGGACCACCGCGCTATTAGATCGG	CCCACACTACCATCGGCGCTACGGCGTTTCACTGCTGAGTTCGGCATGGGGTCAGGTGGGACCACCGCGCAGATCGGAAGA	2	D3	TTCACTGCTGAGTTGCTATTAGATCGG	CGGCATGGGGTCAGGTGGGACCACCGC	0.111111		-------------{-----(--)-----}--	0.00312101		Providencia stuartii strain CAVP450 chromosome, complete genome	{'superkingdom': 'Bacteria', 'phylum': 'Pseudomonadota', 'class': 'Gammaproteobacteria', 'order': 'Enterobacterales', 'family': 'Morganellaceae', 'genus': 'Providencia', 'species': 'Providencia stuartii'}	Providencia stuartii
CCCACACTACCATCGGCGCTACGGCGT	CCCACACTACCATCGGCGCTACGGCGTTTCACTGCTGAGTTCGGCATGGGGTCAGGTGGGACCACCGCGCTATTAGATCGG	CCCACACTACCATCGGCGCTACGGCGTTTCACTGCTGAGTTCGGCATGGGGTCAGGTGGGACCACCGCGCTATCTCACTAA	2	D3	TTCACTGCTGAGTTGCTATTAGATCGG	CGGCATGGGGTCAGGTGGGACCACCGC	0.111111		-------------{-----(--)-----}--	0.00312101	5S ribosomal RNA	Providencia stuartii strain CAVP450 chromosome, complete genome	{'superkingdom': 'Bacteria', 'phylum': 'Pseudomonadota', 'class': 'Gammaproteobacteria', 'order': 'Enterobacterales', 'family': 'Morganellaceae', 'genus': 'Providencia', 'species': 'Providencia stuartii'}	Providencia stuartii
CCCACACTACCATCGGCGCTACGGCGT	CCCACACTACCATCGGCGCTACGGCGTTTCACTGCTGAGTTCGGCATGGGGTCAGGTGGGACCACCGCGCTATTAGATCGG	CCCACACTACCATCGGCGCTACGGCGTTTCACTGCTGAGTTCGGCATGGGGTCAGGTGGGACCACCGCGCTATTGCAGATC	2	D3	TTCACTGCTGAGTTGCTATTAGATCGG	CGGCATGGGGTCAGGTGGGACCACCGC	0.111111		-------------{-----(--)-----}--	0.00312101	5S ribosomal RNA	Providencia stuartii strain CAVP450 chromosome, complete genome	{'superkingdom': 'Bacteria', 'phylum': 'Pseudomonadota', 'class': 'Gammaproteobacteria', 'order': 'Enterobacterales', 'family': 'Morganellaceae', 'genus': 'Providencia', 'species': 'Providencia stuartii'}	Providencia stuartii
GGTCGCCCATCTAAGTACTAATCGCGC	GGTCGCCCATCTAAGTACTAATCGCGCCCGATGTTGCTTAACTTCAGTGATCGGACGAGAACTGGTGTTTTCAACAGATC	GGTCGCCCATCTAAGTACTAATCGCGCCCGATGTTGCTTAACTTCGGTGATCGGACGAGAACCGGTGTTTTCAACAGATCG	9	D1	CCGATGTTGCTTAACTTCAGTGATCGGA	CGAGAACTGGTGTTTTCAACAGATCG	0.230769	{-----(-------------g---)-----}-		0.00312343	5S ribosomal RNA	PREDICTED: Aedes albopictus 5S ribosomal RNA (LOC134289303), rRNA	{'superkingdom': 'Eukaryota', 'phylum': 'Arthropoda', 'class': 'Insecta', 'order': 'Diptera', 'family': 'Culicidae', 'genus': 'Aedes', 'species': 'Aedes albopictus'}	Aedes albopictus
GGTCGCCCATCTAAGTACTAATCGCGC	GGTCGCCCATCTAAGTACTAATCGCGCCCGATGTTGCTTAACTTCAGTGATCGGACGAGAACTGGTGTTTTCAACAGATC	GGTCGCCCATCTAAGTACTAATCGCGCCCGATGTTGCTTAACTTCGGTGATCGGACGAGAACCGGTGTTTTCAAGATCGGA	8	D1	CCGATGTTGCTTAACTTCAGTGATCGGA	CGAGAACTGGTGTTTTCAACAGATCG	0.205128	{-----(-------------g---)-----}-		0.00312343	5S ribosomal RNA	PREDICTED: Aedes albopictus 5S ribosomal RNA (LOC134289303), rRNA	{'superkingdom': 'Eukaryota', 'phylum': 'Arthropoda', 'class': 'Insecta', 'order': 'Diptera', 'family': 'Culicidae', 'genus': 'Aedes', 'species': 'Aedes albopictus'}	Aedes albopictus
GGTCGCCCATCTAAGTACTAATCGCGC	GGTCGCCCATCTAAGTACTAATCGCGCCCGATGTTGCTTAACTTCAGTGATCGGACGAGAACTGGTGTTTTCAACAGATC	GGTCGCCCATCTAAGTACTAATCGCGCCCGATGTTGCTTAACTTCAGTGATCGGACGAGAACTGGTGTTTTCAAAGATCGG	4	D1	CCGATGTTGCTTAACTTCAGTGATCGGA	CGAGAACTGGTGTTTTCAACAGATCG	0.102564	{-----(-----------------)-----}-		0.00312343	5S ribosomal RNA	PREDICTED: Aedes albopictus 5S ribosomal RNA (LOC134289303), rRNA	{'superkingdom': 'Eukaryota', 'phylum': 'Arthropoda', 'class': 'Insecta', 'order': 'Diptera', 'family': 'Culicidae', 'genus': 'Aedes', 'species': 'Aedes albopictus'}	Aedes albopictus
GGTCGCCCATCTAAGTACTAATCGCGC	GGTCGCCCATCTAAGTACTAATCGCGCCCGATGTTGCTTAACTTCAGTGATCGGACGAGAACTGGTGTTTTCAACAGATC	GGTCGCCCATCTAAGTACTAATCGCGCCCGATGTTGCTTAACTTCAGTGATCGGACGAGAACTGGTGTTTTCAGATCGGAA	4	D1	CCGATGTTGCTTAACTTCAGTGATCGGA	CGAGAACTGGTGTTTTCAACAGATCG	0.102564	{-----(-----------------)-----}-		0.00312343	5S ribosomal RNA	PREDICTED: Aedes albopictus 5S ribosomal RNA (LOC134289303), rRNA	{'superkingdom': 'Eukaryota', 'phylum': 'Arthropoda', 'class': 'Insecta', 'order': 'Diptera', 'family': 'Culicidae', 'genus': 'Aedes', 'species': 'Aedes albopictus'}	Aedes albopictus
GGTCGCCCATCTAAGTACTAATCGCGC	GGTCGCCCATCTAAGTACTAATCGCGCCCGATGTTGCTTAACTTCAGTGATCGGACGAGAACTGGTGTTTTCAACAGATC	GGTCGCCCATCTAAGTACTAATCGCGCCCGATGTTGCTTAACTTCGGTGATCGGACGAGAACCGGTGTTTTCAAAGATCGG	4	D1	CCGATGTTGCTTAACTTCAGTGATCGGA	CGAGAACTGGTGTTTTCAACAGATCG	0.102564	{-----(-------------g---)-----}-		0.00312343	5S ribosomal RNA	PREDICTED: Aedes albopictus 5S ribosomal RNA (LOC134289303), rRNA	{'superkingdom': 'Eukaryota', 'phylum': 'Arthropoda', 'class': 'Insecta', 'order': 'Diptera', 'family': 'Culicidae', 'genus': 'Aedes', 'species': 'Aedes albopictus'}	Aedes albopictus
GGTCGCCCATCTAAGTACTAATCGCGC	GGTCGCCCATCTAAGTACTAATCGCGCCCGATGTTGCTTAACTTCAGTGATCGGACGAGAACTGGTGTTTTCAACAGATC	GGTCGCCCATCTAAGTACTAATCGCGCCCGATGTTGCTTAACTTCGGTGATCGGACGAGAACCGGTGTTTTCAACATGGAG	4	D1	CCGATGTTGCTTAACTTCAGTGATCGGA	CGAGAACTGGTGTTTTCAACAGATCG	0.102564	{-----(-------------g---)-----}-		0.00312343	5S ribosomal RNA	PREDICTED: Aedes albopictus 5S ribosomal RNA (LOC134289303), rRNA	{'superkingdom': 'Eukaryota', 'phylum': 'Arthropoda', 'class': 'Insecta', 'order': 'Diptera', 'family': 'Culicidae', 'genus': 'Aedes', 'species': 'Aedes albopictus'}	Aedes albopictus
GGTCGCCCATCTAAGTACTAATCGCGC	GGTCGCCCATCTAAGTACTAATCGCGCCCGATGTTGCTTAACTTCAGTGATCGGACGAGAACTGGTGTTTTCAACAGATC	GGTCGCCCATCTAAGTACTAATCGCGCCCGATGTTGCTTAACTTCAGTGATCGGACGAGAACTGGTGTTTTCAACATGGTA	3	D1	CCGATGTTGCTTAACTTCAGTGATCGGA	CGAGAACTGGTGTTTTCAACAGATCG	0.0769231	{-----(-----------------)-----}-		0.00312343	5S ribosomal RNA	PREDICTED: Aedes albopictus 5S ribosomal RNA (LOC134289303), rRNA	{'superkingdom': 'Eukaryota', 'phylum': 'Arthropoda', 'class': 'Insecta', 'order': 'Diptera', 'family': 'Culicidae', 'genus': 'Aedes', 'species': 'Aedes albopictus'}	Aedes albopictus
GGTCGCCCATCTAAGTACTAATCGCGC	GGTCGCCCATCTAAGTACTAATCGCGCCCGATGTTGCTTAACTTCAGTGATCGGACGAGAACTGGTGTTTTCAACAGATC	GGTCGCCCATCTAAGTACTAATCGCGCCCGATGTTGCTTAACTTCGGTGATCGGACGAGAACCGGTTGTCTCAAAGTGCGG	3	D1	CCGATGTTGCTTAACTTCAGTGATCGGA	CGAGAACTGGTGTTTTCAACAGATCG	0.0769231	{-----(-------------g---)-----}-		0.00312343	5S ribosomal RNA	PREDICTED: Aedes albopictus 5S ribosomal RNA (LOC134289303), rRNA	{'superkingdom': 'Eukaryota', 'phylum': 'Arthropoda', 'class': 'Insecta', 'order': 'Diptera', 'family': 'Culicidae', 'genus': 'Aedes', 'species': 'Aedes albopictus'}	Aedes albopictus
CTTTCACCCCTACCCACAGCTCATCCC	CTTTCACCCCTACCCACAGCTCATCCCCTAATTTTTCAACATTAGTGGGTTCGGACCTCCAGGGCGTGTTACCGCACCTT	CTTTCACCCCTACCCACAGCTCATCCCCTCAGTTTTCAACCTAAGTGGGTTCGCGCCTCCACGACGTCTTACCATCGCTTC	2	D1	CTAATTTTTCAACATTAGTGGGTTCGGA	CCTCCAGGGCGTGTTACCGCACCTTC	0.333333	{--c-G(--------)C-a--}--------cg		0.00322773	23S ribosomal RNA	Janthinobacterium sp. TB1-E2 chromosome, complete genome	{'superkingdom': 'Bacteria', 'phylum': 'Pseudomonadota', 'class': 'Betaproteobacteria', 'order': 'Burkholderiales', 'family': 'Oxalobacteraceae', 'genus': 'Janthinobacterium', 'species': 'Janthinobacterium sp. TB1-E2'}	Janthinobacterium sp. TB1-E2
CTTTCACCCCTACCCACAGCTCATCCC	CTTTCACCCCTACCCACAGCTCATCCCCTAATTTTTCAACATTAGTGGGTTCGGACCTCCAGGGCGTGTTACCGCACCTT	CTTTCACCCCTACCCACAGCTCATCCCCTCAGTCTTCAACCTAAGTGGGTTCGGGCCTCCACGCGGTCTTACCCGCGCTTC	1	D1	CTAATTTTTCAACATTAGTGGGTTCGGA	CCTCCAGGGCGTGTTACCGCACCTTC	0.166667	{--c-G(-c------)C-a--}---------g		0.00322773	23S ribosomal RNA	Janthinobacterium sp. TB1-E2 chromosome, complete genome	{'superkingdom': 'Bacteria', 'phylum': 'Pseudomonadota', 'class': 'Betaproteobacteria', 'order': 'Burkholderiales', 'family': 'Oxalobacteraceae', 'genus': 'Janthinobacterium', 'species': 'Janthinobacterium sp. TB1-E2'}	Janthinobacterium sp. TB1-E2
CTTTCACCCCTACCCACAGCTCATCCC	CTTTCACCCCTACCCACAGCTCATCCCCTAATTTTTCAACATTAGTGGGTTCGGACCTCCAGGGCGTGTTACCGCACCTT	CTTTCACCCCTACCCACAGCTCATCCCCTCAGTTTTCAACCTAAGTGGGTTCGCGCCTCCACGCGGTCTTACCCGCGCTTC	1	D1	CTAATTTTTCAACATTAGTGGGTTCGGA	CCTCCAGGGCGTGTTACCGCACCTTC	0.166667	{--c-G(--------)C-a--}--------cg		0.00322773	23S ribosomal RNA	Janthinobacterium sp. TB1-E2 chromosome, complete genome	{'superkingdom': 'Bacteria', 'phylum': 'Pseudomonadota', 'class': 'Betaproteobacteria', 'order': 'Burkholderiales', 'family': 'Oxalobacteraceae', 'genus': 'Janthinobacterium', 'species': 'Janthinobacterium sp. TB1-E2'}	Janthinobacterium sp. TB1-E2
CTTTCACCCCTACCCACAGCTCATCCC	CTTTCACCCCTACCCACAGCTCATCCCCTAATTTTTCAACATTAGTGGGTTCGGACCTCCAGGGCGTGTTACCGCACCTT	CTTTCACCCCTACCCACAGCTCATCCCCTCAGTTTTTAACCTAAGTGGGTTCGGGCCTCCACGCGGTCTTACCCGCGCTTC	1	D1	CTAATTTTTCAACATTAGTGGGTTCGGA	CCTCCAGGGCGTGTTACCGCACCTTC	0.166667	{--c-G(----t---)C-a--}---------g		0.00322773	23S ribosomal RNA	Janthinobacterium sp. TB1-E2 chromosome, complete genome	{'superkingdom': 'Bacteria', 'phylum': 'Pseudomonadota', 'class': 'Betaproteobacteria', 'order': 'Burkholderiales', 'family': 'Oxalobacteraceae', 'genus': 'Janthinobacterium', 'species': 'Janthinobacterium sp. TB1-E2'}	Janthinobacterium sp. TB1-E2
CTTTCACCCCTACCCACAGCTCATCCC	CTTTCACCCCTACCCACAGCTCATCCCCTAATTTTTCAACATTAGTGGGTTCGGACCTCCAGGGCGTGTTACCGCACCTT	CTTTCACCCCTACCCACAGCTCATCCCCTCCATTTTCAACTGAAGTGGGTTCGGTCAACAGGTAGTATTCAGGCTTACCAG	1	D1	CTAATTTTTCAACATTAGTGGGTTCGGA	CCTCCAGGGCGTGTTACCGCACCTTC	0.166667	{--cCA(--------)TGa--}---------t		0.00322773		Janthinobacterium sp. TB1-E2 chromosome, complete genome	{'superkingdom': 'Bacteria', 'phylum': 'Pseudomonadota', 'class': 'Betaproteobacteria', 'order': 'Burkholderiales', 'family': 'Oxalobacteraceae', 'genus': 'Janthinobacterium', 'species': 'Janthinobacterium sp. TB1-E2'}	Janthinobacterium sp. TB1-E2
GACATGCATGGCTTAACCTTTGAGACA	GACATGCATGGCTTAACCTTTGAGACAAGCGTATATTACTGGTAGGATCAACCAGAATTCGTCGACATTAGCGCACACGCA	GACATGCATGGCTTAACCTTTGAGACAAGCGTATATTACTGGTAGGATCAACCAGAATTCGTCAACATTAGCGCACGCAGA	79	D1	AGCGTATATTACTGGTAGGATCAACCAG	AATTCGTCGACATTAGCGCACACGCA	0.359091	-----------{-----(-------)-----}		0.00344226	18S ribosomal RNA	Culex torrentium clone torrentium2 28S ribosomal RNA gene, partial sequence; 28S-18S ribosomal RNA intergenic spacer, complete sequence; and 18S ribosomal RNA gene, partial sequence	{'superkingdom': 'Eukaryota', 'phylum': 'Arthropoda', 'class': 'Insecta', 'order': 'Diptera', 'family': 'Culicidae', 'genus': 'Culex', 'species': 'Culex torrentium'}	Culex torrentium
GACATGCATGGCTTAACCTTTGAGACA	GACATGCATGGCTTAACCTTTGAGACAAGCGTATATTACTGGTAGGATCAACCAGAATTCGTCGACATTAGCGCACACGCA	GACATGCATGGCTTAACCTTTGAGACAAGCGTATATTACTGGTAGGATCAACCAGAATTCTCGTCGTGGATAGAACAACAA	72	D1	AGCGTATATTACTGGTAGGATCAACCAG	AATTCGTCGACATTAGCGCACACGCA	0.327273	-----------{-----(-------)-----}		0.00344226	18S ribosomal RNA	Culex torrentium clone torrentium2 28S ribosomal RNA gene, partial sequence; 28S-18S ribosomal RNA intergenic spacer, complete sequence; and 18S ribosomal RNA gene, partial sequence	{'superkingdom': 'Eukaryota', 'phylum': 'Arthropoda', 'class': 'Insecta', 'order': 'Diptera', 'family': 'Culicidae', 'genus': 'Culex', 'species': 'Culex torrentium'}	Culex torrentium
GACATGCATGGCTTAACCTTTGAGACA	GACATGCATGGCTTAACCTTTGAGACAAGCGTATATTACTGGTAGGATCAACCAGAATTCGTCGACATTAGCGCACACGCA	GACATGCATGGCTTAACCTTTGAGACAAGCGTATATTACTGGTAGGATCAACCAGAATTCTTCGACACACGATACGACGAT	47	D1	AGCGTATATTACTGGTAGGATCAACCAG	AATTCGTCGACATTAGCGCACACGCA	0.213636	-----------{-----(-------)-----}		0.00344226	18S ribosomal RNA	Culex torrentium clone torrentium2 28S ribosomal RNA gene, partial sequence; 28S-18S ribosomal RNA intergenic spacer, complete sequence; and 18S ribosomal RNA gene, partial sequence	{'superkingdom': 'Eukaryota', 'phylum': 'Arthropoda', 'class': 'Insecta', 'order': 'Diptera', 'family': 'Culicidae', 'genus': 'Culex', 'species': 'Culex torrentium'}	Culex torrentium
GACATGCATGGCTTAACCTTTGAGACA	GACATGCATGGCTTAACCTTTGAGACAAGCGTATATTACTGGTAGGATCAACCAGAATTCGTCGACATTAGCGCACACGCA	GACATGCATGGCTTAACCTTTGAGACAAGCGTATATTACTGGTAGGATCAACCAGAATTCGTCAACATTATCACATCGTCA	22	D1	AGCGTATATTACTGGTAGGATCAACCAG	AATTCGTCGACATTAGCGCACACGCA	0.1	-----------{-----(-------)-----}		0.00344226	18S ribosomal RNA	Culex torrentium clone torrentium2 28S ribosomal RNA gene, partial sequence; 28S-18S ribosomal RNA intergenic spacer, complete sequence; and 18S ribosomal RNA gene, partial sequence	{'superkingdom': 'Eukaryota', 'phylum': 'Arthropoda', 'class': 'Insecta', 'order': 'Diptera', 'family': 'Culicidae', 'genus': 'Culex', 'species': 'Culex torrentium'}	Culex torrentium
TGTTGTCTTCCTATGGAAGAGCTATCA	TGTTGTCTTCCTATGGAAGAGCTATCAGATGTTAAGCTGATAAGAACAGATACTACACTTTGATCTTAGCCTTTAGAGAT	TGTTGTCTTCCTATGGAAGAGCTATCAGATGTTAAGCTGATAAGAACAGATACTACACTTTGATCTTAGCCTTAGATCGGA	2	D2	GATGTTAAGCTGATCACTTTGATCTTA	AAGAACAGATACTAGCCTTTAGAGATC	0.333333	-----------{-----(---)-----}---		0.00362268	U2 spliceosomal RNA	Anopheles arabiensis genome assembly, chromosome: 2	{'superkingdom': 'Eukaryota', 'phylum': 'Arthropoda', 'class': 'Insecta', 'order': 'Diptera', 'family': 'Culicidae', 'genus': 'Anopheles', 'species': 'Anopheles arabiensis'}	Anopheles arabiensis
TGTTGTCTTCCTATGGAAGAGCTATCA	TGTTGTCTTCCTATGGAAGAGCTATCAGATGTTAAGCTGATAAGAACAGATACTACACTTTGATCTTAGCCTTTAGAGAT	TGTTGTCTTCCTATGGAAGAGCTATCAGATGTTAAGCTGATAAGAACAGATACTACACTTTGATCTTAGCCTTTAAGATCG	1	D2	GATGTTAAGCTGATCACTTTGATCTTA	AAGAACAGATACTAGCCTTTAGAGATC	0.166667	-----------{-----(---)-----}---		0.00362268	U2 spliceosomal RNA	Anopheles arabiensis genome assembly, chromosome: 2	{'superkingdom': 'Eukaryota', 'phylum': 'Arthropoda', 'class': 'Insecta', 'order': 'Diptera', 'family': 'Culicidae', 'genus': 'Anopheles', 'species': 'Anopheles arabiensis'}	Anopheles arabiensis
TGTTGTCTTCCTATGGAAGAGCTATCA	TGTTGTCTTCCTATGGAAGAGCTATCAGATGTTAAGCTGATAAGAACAGATACTACACTTTGATCTTAGCCTTTAGAGAT	TGTTGTCTTCCTATGGAAGAGCTATCAGATGTTAAGCTGATAAGAACAGATACTACACTTTGATCTTAGCCTTTAGATCGG	1	D2	GATGTTAAGCTGATCACTTTGATCTTA	AAGAACAGATACTAGCCTTTAGAGATC	0.166667	-----------{-----(---)-----}---		0.00362268	U2 spliceosomal RNA	Anopheles arabiensis genome assembly, chromosome: 2	{'superkingdom': 'Eukaryota', 'phylum': 'Arthropoda', 'class': 'Insecta', 'order': 'Diptera', 'family': 'Culicidae', 'genus': 'Anopheles', 'species': 'Anopheles arabiensis'}	Anopheles arabiensis
TGTTGTCTTCCTATGGAAGAGCTATCA	TGTTGTCTTCCTATGGAAGAGCTATCAGATGTTAAGCTGATAAGAACAGATACTACACTTTGATCTTAGCCTTTAGAGAT	TGTTGTCTTCCTATGGAAGAGCTATCAGATGTTAAGCTGATAAGAACAGATACTACACTTTGATCTTAGCCTTTAGGAGAT	1	D2	GATGTTAAGCTGATCACTTTGATCTTA	AAGAACAGATACTAGCCTTTAGAGATC	0.166667	-----------{-----(---)-----}---		0.00362268	U2 spliceosomal RNA	Anopheles arabiensis genome assembly, chromosome: 2	{'superkingdom': 'Eukaryota', 'phylum': 'Arthropoda', 'class': 'Insecta', 'order': 'Diptera', 'family': 'Culicidae', 'genus': 'Anopheles', 'species': 'Anopheles arabiensis'}	Anopheles arabiensis
TGTTGTCTTCCTATGGAAGAGCTATCA	TGTTGTCTTCCTATGGAAGAGCTATCAGATGTTAAGCTGATAAGAACAGATACTACACTTTGATCTTAGCCTTTAGAGAT	TGTTGTCTTCCTATGGAAGAGCTATCAGATGTTAAGCTGATAAGAACAGATACTACACTTTGATCTTAGCCTTTAGGCCGA	1	D2	GATGTTAAGCTGATCACTTTGATCTTA	AAGAACAGATACTAGCCTTTAGAGATC	0.166667	-----------{-----(---)-----}---		0.00362268	U2 spliceosomal RNA	Anopheles arabiensis genome assembly, chromosome: 2	{'superkingdom': 'Eukaryota', 'phylum': 'Arthropoda', 'class': 'Insecta', 'order': 'Diptera', 'family': 'Culicidae', 'genus': 'Anopheles', 'species': 'Anopheles arabiensis'}	Anopheles arabiensis
TTCATGTGTCCTGAAGTTCACATTCTG	TTCATGTGTCCTGAAGTTCACATTCTGACGCGCATTTAGCTGCGGTCTTCATCGATCCACGAGCCGAGTGATCCCCAGATC	TTCATGTGTCCTGAAGTTCACATTCTGACGCGCATTTAGCTGCGGTCTTCATCGATCCACGAGCCGAGTGATCAGATCGGA	17	D2	ACGCGCATTTAGCTTCCACGAGCCGAG	GCGGTCTTCATCGATGATCCCCAGATC	0.186813		-------{-----()-----}--agatcgga	0.00364411	5.8S ribosomal RNA		{'superkingdom': 'Eukaryota', 'phylum': 'Arthropoda', 'class': 'Insecta', 'order': 'Diptera', 'family': 'Culicidae', 'genus': 'Malaya', 'species': 'Malaya genurostris'}	Malaya genurostris
TTCATGTGTCCTGAAGTTCACATTCTG	TTCATGTGTCCTGAAGTTCACATTCTGACGCGCATTTAGCTGCGGTCTTCATCGATCCACGAGCCGAGTGATCCCCAGATC	TTCATGTGTCCTGAAGTTCACATTCTGACGCGCATTTAGCTGCGGTCTTCATCGATCCACGAGCCGAGTGATCCCAGATCG	15	D2	ACGCGCATTTAGCTTCCACGAGCCGAG	GCGGTCTTCATCGATGATCCCCAGATC	0.164835		-------{-----()-----}----agatcg	0.00364411	5.8S ribosomal RNA		{'superkingdom': 'Eukaryota', 'phylum': 'Arthropoda', 'class': 'Insecta', 'order': 'Diptera', 'family': 'Culicidae', 'genus': 'Malaya', 'species': 'Malaya genurostris'}	Malaya genurostris
TTCATGTGTCCTGAAGTTCACATTCTG	TTCATGTGTCCTGAAGTTCACATTCTGACGCGCATTTAGCTGCGGTCTTCATCGATCCACGAGCCGAGTGATCCCCAGATC	TTCATGTGTCCTGAAGTTCACATTCTGACGCGCATTTAGCTGCGGTCTTCATCGATCCACGAGCCGAGTGATCCCCTAGAT	14	D2	ACGCGCATTTAGCTTCCACGAGCCGAG	GCGGTCTTCATCGATGATCCCCAGATC	0.153846		-------{-----()-----}-----tagat	0.00364411	5.8S ribosomal RNA		{'superkingdom': 'Eukaryota', 'phylum': 'Arthropoda', 'class': 'Insecta', 'order': 'Diptera', 'family': 'Culicidae', 'genus': 'Malaya', 'species': 'Malaya genurostris'}	Malaya genurostris
TTCATGTGTCCTGAAGTTCACATTCTG	TTCATGTGTCCTGAAGTTCACATTCTGACGCGCATTTAGCTGCGGTCTTCATCGATCCACGAGCCGAGTGATCCCCAGATC	TTCATGTGTCCTGAAGTTCACATTCTGACGCGCATTTAGCTGCGGTCTTCATCGATCCACGAGCCGAGTGATCCCCTGAGA	14	D2	ACGCGCATTTAGCTTCCACGAGCCGAG	GCGGTCTTCATCGATGATCCCCAGATC	0.153846		-------{-----()-----}-----t--ga	0.00364411	5.8S ribosomal RNA		{'superkingdom': 'Eukaryota', 'phylum': 'Arthropoda', 'class': 'Insecta', 'order': 'Diptera', 'family': 'Culicidae', 'genus': 'Malaya', 'species': 'Malaya genurostris'}	Malaya genurostris
TTCATGTGTCCTGAAGTTCACATTCTG	TTCATGTGTCCTGAAGTTCACATTCTGACGCGCATTTAGCTGCGGTCTTCATCGATCCACGAGCCGAGTGATCCCCAGATC	TTCATGTGTCCTGAAGTTCACATTCTGACGCGCATTTAGCTGCGGTCTTCATCGATCCACGAGCCGAGTGATCCAGATCGG	13	D2	ACGCGCATTTAGCTTCCACGAGCCGAG	GCGGTCTTCATCGATGATCCCCAGATC	0.142857		-------{-----()-----}---ag-tcgg	0.00364411	5.8S ribosomal RNA		{'superkingdom': 'Eukaryota', 'phylum': 'Arthropoda', 'class': 'Insecta', 'order': 'Diptera', 'family': 'Culicidae', 'genus': 'Malaya', 'species': 'Malaya genurostris'}	Malaya genurostris
TTCATGTGTCCTGAAGTTCACATTCTG	TTCATGTGTCCTGAAGTTCACATTCTGACGCGCATTTAGCTGCGGTCTTCATCGATCCACGAGCCGAGTGATCCCCAGATC	TTCATGTGTCCTGAAGTTCACATTCTGACGCGCATTTAGCTGCGGTCTTCATCGATCCACGAGCCGAGTGATCCCCTGCCT	11	D2	ACGCGCATTTAGCTTCCACGAGCCGAG	GCGGTCTTCATCGATGATCCCCAGATC	0.120879		-------{-----()-----}-----t-cct	0.00364411	5.8S ribosomal RNA		{'superkingdom': 'Eukaryota', 'phylum': 'Arthropoda', 'class': 'Insecta', 'order': 'Diptera', 'family': 'Culicidae', 'genus': 'Malaya', 'species': 'Malaya genurostris'}	Malaya genurostris
TTCATGTGTCCTGAAGTTCACATTCTG	TTCATGTGTCCTGAAGTTCACATTCTGACGCGCATTTAGCTGCGGTCTTCATCGATCCACGAGCCGAGTGATCCCCAGATC	TTCATGTGTCCTGAAGTTCACATTCTGACGCGCATTTAGCTGCGGTCTTCATCGATCCACGAGCCGAGTGAGATCGGAAGA	7	D2	ACGCGCATTTAGCTTCCACGAGCCGAG	GCGGTCTTCATCGATGATCCCCAGATC	0.0769231		-------{-----()-----}gat-gga-ga	0.00364411	5.8S ribosomal RNA		{'superkingdom': 'Eukaryota', 'phylum': 'Arthropoda', 'class': 'Insecta', 'order': 'Diptera', 'family': 'Culicidae', 'genus': 'Malaya', 'species': 'Malaya genurostris'}	Malaya genurostris
CGGTCACCCATCTAAGTACTAATCACG	CGGTCACCCATCTAAGTACTAATCACGCCCGATGTTGCTTAACTTCAGTGATCGGACGAGAACTGGTGTTTTCAACAGATC	CGGTCACCCATCTAAGTACTAATCACGCCCGATGTTGCTTAACTTCGGTGATCGGACGAGAACCGGTGTTTTCAAGATCGG	3	D1	CCCGATGTTGCTTAACTTCAGTGATCGG	ACGAGAACTGGTGTTTTCAACAGATC	0.272727	-{-----(-------------g---)-----}		0.00367244	5S ribosomal RNA		{'superkingdom': 'Eukaryota', 'phylum': 'Arthropoda', 'class': 'Insecta', 'order': 'Diptera', 'family': 'Culicidae', 'genus': 'Armigeres', 'species': 'Armigeres subalbatus'}	Armigeres subalbatus
CGGTCACCCATCTAAGTACTAATCACG	CGGTCACCCATCTAAGTACTAATCACGCCCGATGTTGCTTAACTTCAGTGATCGGACGAGAACTGGTGTTTTCAACAGATC	CGGTCACCCATCTAAGTACTAATCACGCCCGATGTTGCTTAACTTCAGTGATCGGACGAGAACTGGTGTTTTCAAAGATCG	2	D1	CCCGATGTTGCTTAACTTCAGTGATCGG	ACGAGAACTGGTGTTTTCAACAGATC	0.181818	-{-----(-----------------)-----}		0.00367244	5S ribosomal RNA		{'superkingdom': 'Eukaryota', 'phylum': 'Arthropoda', 'class': 'Insecta', 'order': 'Diptera', 'family': 'Culicidae', 'genus': 'Armigeres', 'species': 'Armigeres subalbatus'}	Armigeres subalbatus
CGGTCACCCATCTAAGTACTAATCACG	CGGTCACCCATCTAAGTACTAATCACGCCCGATGTTGCTTAACTTCAGTGATCGGACGAGAACTGGTGTTTTCAACAGATC	CGGTCACCCATCTAAGTACTAATCACGCCCGATGTTGCTTAACTTCGGTGATCGGACGAGAACCGGTGTTTTCAACATGAG	2	D1	CCCGATGTTGCTTAACTTCAGTGATCGG	ACGAGAACTGGTGTTTTCAACAGATC	0.181818	-{-----(-------------g---)-----}		0.00367244	5S ribosomal RNA		{'superkingdom': 'Eukaryota', 'phylum': 'Arthropoda', 'class': 'Insecta', 'order': 'Diptera', 'family': 'Culicidae', 'genus': 'Armigeres', 'species': 'Armigeres subalbatus'}	Armigeres subalbatus
CGGTCACCCATCTAAGTACTAATCACG	CGGTCACCCATCTAAGTACTAATCACGCCCGATGTTGCTTAACTTCAGTGATCGGACGAGAACTGGTGTTTTCAACAGATC	CGGTCACCCATCTAAGTACTAATCACGCCCGATGTTGCTTAACTTCGGTGATCGGACGAGAACCGGTGTTTTCAATACTTT	2	D1	CCCGATGTTGCTTAACTTCAGTGATCGG	ACGAGAACTGGTGTTTTCAACAGATC	0.181818	-{-----(-------------g---)-----}		0.00367244	5S ribosomal RNA		{'superkingdom': 'Eukaryota', 'phylum': 'Arthropoda', 'class': 'Insecta', 'order': 'Diptera', 'family': 'Culicidae', 'genus': 'Armigeres', 'species': 'Armigeres subalbatus'}	Armigeres subalbatus
CGGTCACCCATCTAAGTACTAATCACG	CGGTCACCCATCTAAGTACTAATCACGCCCGATGTTGCTTAACTTCAGTGATCGGACGAGAACTGGTGTTTTCAACAGATC	CGGTCACCCATCTAAGTACTAATCACGCCCGATGTTGCTTAACTTCAGTGATCGGACGAGAACTGGTGTTTTCAGATCGGA	1	D1	CCCGATGTTGCTTAACTTCAGTGATCGG	ACGAGAACTGGTGTTTTCAACAGATC	0.0909091	-{-----(-----------------)-----}		0.00367244	5S ribosomal RNA		{'superkingdom': 'Eukaryota', 'phylum': 'Arthropoda', 'class': 'Insecta', 'order': 'Diptera', 'family': 'Culicidae', 'genus': 'Armigeres', 'species': 'Armigeres subalbatus'}	Armigeres subalbatus
CGGTCACCCATCTAAGTACTAATCACG	CGGTCACCCATCTAAGTACTAATCACGCCCGATGTTGCTTAACTTCAGTGATCGGACGAGAACTGGTGTTTTCAACAGATC	CGGTCACCCATCTAAGTACTAATCACGCCCGATGTTGCTTAACTTCGGTGATCGGACGAGAACCGGTGTTTTAGATCGGAA	1	D1	CCCGATGTTGCTTAACTTCAGTGATCGG	ACGAGAACTGGTGTTTTCAACAGATC	0.0909091	-{-----(-------------g---)-----}		0.00367244	5S ribosomal RNA		{'superkingdom': 'Eukaryota', 'phylum': 'Arthropoda', 'class': 'Insecta', 'order': 'Diptera', 'family': 'Culicidae', 'genus': 'Armigeres', 'species': 'Armigeres subalbatus'}	Armigeres subalbatus
CCACACTACCATCGGCGCTACGGCGTT	CCACACTACCATCGGCGCTACGGCGTTTCACTGCTGAGTTCGGCATGGGGTCAGGTGGGACCACCGCGCTATTGCCGAGAT	CCACACTACCATCGGCGCTACGGCGTTTCACTGCTGAGTTCGGCATGGGGTCAGGTGGGACCACCGCGCTAGATCGGAAGA	4	D3	TCACTGCTGAGTTCCTATTGCCGAGAT	GGCATGGGGTCAGGTGGGACCACCGCG	0.307692		------------{-----(--)-----}---	0.00372573	5S ribosomal RNA		{'superkingdom': 'Bacteria', 'phylum': 'Pseudomonadota', 'class': 'Gammaproteobacteria', 'order': 'Enterobacterales', 'family': 'Morganellaceae', 'genus': 'Providencia', 'species': 'Providencia vermicola'}	Providencia vermicola
CCACACTACCATCGGCGCTACGGCGTT	CCACACTACCATCGGCGCTACGGCGTTTCACTGCTGAGTTCGGCATGGGGTCAGGTGGGACCACCGCGCTATTGCCGAGAT	CCACACTACCATCGGCGCTACGGCGTTTCACTGCTGAGTTCGGCATGGGGTCAGGTGGGACCACCGCGCTATTAGATCGGA	4	D3	TCACTGCTGAGTTCCTATTGCCGAGAT	GGCATGGGGTCAGGTGGGACCACCGCG	0.307692		------------{-----(--)-----}---	0.00372573	5S ribosomal RNA		{'superkingdom': 'Bacteria', 'phylum': 'Pseudomonadota', 'class': 'Gammaproteobacteria', 'order': 'Enterobacterales', 'family': 'Morganellaceae', 'genus': 'Providencia', 'species': 'Providencia vermicola'}	Providencia vermicola
CCACACTACCATCGGCGCTACGGCGTT	CCACACTACCATCGGCGCTACGGCGTTTCACTGCTGAGTTCGGCATGGGGTCAGGTGGGACCACCGCGCTATTGCCGAGAT	CCACACTACCATCGGCGCTACGGCGTTTCACTGCTGAGTTCGGCATGGGGTCAGGTGGGACCACCGCGAGATCTGAAGAGC	1	D3	TCACTGCTGAGTTCCTATTGCCGAGAT	GGCATGGGGTCAGGTGGGACCACCGCG	0.0769231		------------{-----(--)-----}---	0.00372573			{'superkingdom': 'Bacteria', 'phylum': 'Pseudomonadota', 'class': 'Gammaproteobacteria', 'order': 'Enterobacterales', 'family': 'Morganellaceae', 'genus': 'Providencia', 'species': 'Providencia vermicola'}	Providencia vermicola
CCACACTACCATCGGCGCTACGGCGTT	CCACACTACCATCGGCGCTACGGCGTTTCACTGCTGAGTTCGGCATGGGGTCAGGTGGGACCACCGCGCTATTGCCGAGAT	CCACACTACCATCGGCGCTACGGCGTTTCACTGCTGAGTTCGGCATGGGGTCAGGTGGGACCACCGCGCAATAGATAGGAA	1	D3	TCACTGCTGAGTTCCTATTGCCGAGAT	GGCATGGGGTCAGGTGGGACCACCGCG	0.0769231		------------{-----(--)-----}---	0.00372573			{'superkingdom': 'Bacteria', 'phylum': 'Pseudomonadota', 'class': 'Gammaproteobacteria', 'order': 'Enterobacterales', 'family': 'Morganellaceae', 'genus': 'Providencia', 'species': 'Providencia vermicola'}	Providencia vermicola
CCACACTACCATCGGCGCTACGGCGTT	CCACACTACCATCGGCGCTACGGCGTTTCACTGCTGAGTTCGGCATGGGGTCAGGTGGGACCACCGCGCTATTGCCGAGAT	CCACACTACCATCGGCGCTACGGCGTTTCACTGCTGAGTTCGGCATGGGGTCAGGTGGGACCACCGCGCTAAGATCGGAAT	1	D3	TCACTGCTGAGTTCCTATTGCCGAGAT	GGCATGGGGTCAGGTGGGACCACCGCG	0.0769231		------------{-----(--)-----}---	0.00372573	5S ribosomal RNA		{'superkingdom': 'Bacteria', 'phylum': 'Pseudomonadota', 'class': 'Gammaproteobacteria', 'order': 'Enterobacterales', 'family': 'Morganellaceae', 'genus': 'Providencia', 'species': 'Providencia vermicola'}	Providencia vermicola
CCACACTACCATCGGCGCTACGGCGTT	CCACACTACCATCGGCGCTACGGCGTTTCACTGCTGAGTTCGGCATGGGGTCAGGTGGGACCACCGCGCTATTGCCGAGAT	CCACACTACCATCGGCGCTACGGCGTTTCACTGCTGAGTTCGGCATGGGGTCAGGTGGGACCACCGCGCTATTGAGATCGG	1	D3	TCACTGCTGAGTTCCTATTGCCGAGAT	GGCATGGGGTCAGGTGGGACCACCGCG	0.0769231		------------{-----(--)-----}---	0.00372573	5S ribosomal RNA		{'superkingdom': 'Bacteria', 'phylum': 'Pseudomonadota', 'class': 'Gammaproteobacteria', 'order': 'Enterobacterales', 'family': 'Morganellaceae', 'genus': 'Providencia', 'species': 'Providencia vermicola'}	Providencia vermicola
CCACACTACCATCGGCGCTACGGCGTT	CCACACTACCATCGGCGCTACGGCGTTTCACTGCTGAGTTCGGCATGGGGTCAGGTGGGACCACCGCGCTATTGCCGAGAT	CCACACTACCATCGGCGCTACGGCGTTTCACTGCTGAGTTCGGCATGGGGTCAGGTGGGACCACCTATAGGAGACACTATC	1	D3	TCACTGCTGAGTTCCTATTGCCGAGAT	GGCATGGGGTCAGGTGGGACCACCGCG	0.0769231		------------{-----(--)-----}tat	0.00372573			{'superkingdom': 'Bacteria', 'phylum': 'Pseudomonadota', 'class': 'Gammaproteobacteria', 'order': 'Enterobacterales', 'family': 'Morganellaceae', 'genus': 'Providencia', 'species': 'Providencia vermicola'}	Providencia vermicola
GTCTGGACCGTGTCTCAGTTCCAGTGT	GTCTGGACCGTGTCTCAGTTCCAGTGTGGCTGGTCATCCTCTCAGACCAGCTAGGGATCGTCGCCTAGGTGAGCCATTAC	GTCTGGACCGTGTCTCAGTTCCAGTGTGACTGATCATCCTCTCAAACCAGTTATGCGTCATAGTCTTGGTAAGCCATTACC	2	D1	GGCTGGTCATCCTCTCAGACCAGCTAGG	GATCGTCGCCTAGGTGAGCCATTACC	0.25	-{A---a--(---------)a-----T}--t-		0.00380157	16S ribosomal RNA	Serratia marcescens strain AD-W2 chromosome, complete genome	{'superkingdom': 'Bacteria', 'phylum': 'Pseudomonadota', 'class': 'Gammaproteobacteria', 'order': 'Enterobacterales', 'family': 'Yersiniaceae', 'genus': 'Serratia', 'species': 'Serratia marcescens'}	Serratia marcescens
GTCTGGACCGTGTCTCAGTTCCAGTGT	GTCTGGACCGTGTCTCAGTTCCAGTGTGGCTGGTCATCCTCTCAGACCAGCTAGGGATCGTCGCCTAGGTGAGCCATTAC	GTCTGGACCGTGTCTCAGTTCCAGTGTGGCTGGTCATCCTCTCAGACCAGCTAGAGATCGTCGCCTAGGTGGGCCTTTACC	2	D1	GGCTGGTCATCCTCTCAGACCAGCTAGG	GATCGTCGCCTAGGTGAGCCATTACC	0.25	-{-------(---------)-------}---a		0.00380157	16S ribosomal RNA	Serratia marcescens strain AD-W2 chromosome, complete genome	{'superkingdom': 'Bacteria', 'phylum': 'Pseudomonadota', 'class': 'Gammaproteobacteria', 'order': 'Enterobacterales', 'family': 'Yersiniaceae', 'genus': 'Serratia', 'species': 'Serratia marcescens'}	Serratia marcescens
GTCTGGACCGTGTCTCAGTTCCAGTGT	GTCTGGACCGTGTCTCAGTTCCAGTGTGGCTGGTCATCCTCTCAGACCAGCTAGGGATCGTCGCCTAGGTGAGCCATTAC	GTCTGGACCGTGTCTCAGTTCCAGTGTGACTGATCATCCTCTCAGACCAGTTACGGATCGTCGCCTAGGTGAGCCATTACC	1	D1	GGCTGGTCATCCTCTCAGACCAGCTAGG	GATCGTCGCCTAGGTGAGCCATTACC	0.125	-{A---a--(---------)------T}--c-		0.00380157	16S ribosomal RNA	Serratia marcescens strain AD-W2 chromosome, complete genome	{'superkingdom': 'Bacteria', 'phylum': 'Pseudomonadota', 'class': 'Gammaproteobacteria', 'order': 'Enterobacterales', 'family': 'Yersiniaceae', 'genus': 'Serratia', 'species': 'Serratia marcescens'}	Serratia marcescens
GTCTGGACCGTGTCTCAGTTCCAGTGT	GTCTGGACCGTGTCTCAGTTCCAGTGTGGCTGGTCATCCTCTCAGACCAGCTAGGGATCGTCGCCTAGGTGAGCCATTAC	GTCTGGACCGTGTCTCAGTTCCAGTGTGCCTGATCGTCCTCTCAGACCAGGTACCCGTCGTAGCCTTGGTGAGCCGTTACC	1	D1	GGCTGGTCATCCTCTCAGACCAGCTAGG	GATCGTCGCCTAGGTGAGCCATTACC	0.125	-{C---a--(g--------)------G}--cc		0.00380157	16S ribosomal RNA	Serratia marcescens strain AD-W2 chromosome, complete genome	{'superkingdom': 'Bacteria', 'phylum': 'Pseudomonadota', 'class': 'Gammaproteobacteria', 'order': 'Enterobacterales', 'family': 'Yersiniaceae', 'genus': 'Serratia', 'species': 'Serratia marcescens'}	Serratia marcescens
GTCTGGACCGTGTCTCAGTTCCAGTGT	GTCTGGACCGTGTCTCAGTTCCAGTGTGGCTGGTCATCCTCTCAGACCAGCTAGGGATCGTCGCCTAGGTGAGCCATTAC	GTCTGGACCGTGTCTCAGTTCCAGTGTGGCCGATCACCCTCTCAGGTCGGCTACGTATCGTTGCCTTGGTAAGCCGTTACC	1	D1	GGCTGGTCATCCTCTCAGACCAGCTAGG	GATCGTCGCCTAGGTGAGCCATTACC	0.125	-{--C-A--(-c-------)-gT-G--}--c-		0.00380157	16S ribosomal RNA	Serratia marcescens strain AD-W2 chromosome, complete genome	{'superkingdom': 'Bacteria', 'phylum': 'Pseudomonadota', 'class': 'Gammaproteobacteria', 'order': 'Enterobacterales', 'family': 'Yersiniaceae', 'genus': 'Serratia', 'species': 'Serratia marcescens'}	Serratia marcescens
GTCTGGACCGTGTCTCAGTTCCAGTGT	GTCTGGACCGTGTCTCAGTTCCAGTGTGGCTGGTCATCCTCTCAGACCAGCTAGGGATCGTCGCCTAGGTGAGCCATTAC	GTCTGGACCGTGTCTCAGTTCCAGTGTTGCTGATCGTCCTCTCAGACCAGCTACCCGTCGTTGCCTTGGTGAGCTCTTACC	1	D1	GGCTGGTCATCCTCTCAGACCAGCTAGG	GATCGTCGCCTAGGTGAGCCATTACC	0.125	t{----a--(g--------)-------}--cc		0.00380157	16S ribosomal RNA	Serratia marcescens strain AD-W2 chromosome, complete genome	{'superkingdom': 'Bacteria', 'phylum': 'Pseudomonadota', 'class': 'Gammaproteobacteria', 'order': 'Enterobacterales', 'family': 'Yersiniaceae', 'genus': 'Serratia', 'species': 'Serratia marcescens'}	Serratia marcescens
GGGCACCCATCTAAGTACTAATCGCGC	GGGCACCCATCTAAGTACTAATCGCGCCCGATGTTGCTTAACTTCGGTGATCGGACGAGAACCGGTGTTTTCAAGATCGG	GGGCACCCATCTAAGTACTAATCGCGCCCGATGTTGCTTAACTTCGGTGATCGGACGAGAACCGGTGTTTTCAACAGATCG	9	D1	CCGATGTTGCTTAACTTCGGTGATCGGA	CGAGAACCGGTGTTTTCAAGATCGGA	0.2	{-----(-----------------)-----}-		0.00380263	5S ribosomal RNA	PREDICTED: Uranotaenia lowii 5S ribosomal RNA (LOC129740736), rRNA	{'superkingdom': 'Eukaryota', 'phylum': 'Arthropoda', 'class': 'Insecta', 'order': 'Diptera', 'family': 'Culicidae', 'genus': 'Uranotaenia', 'species': 'Uranotaenia lowii'}	Uranotaenia lowii
GGGCACCCATCTAAGTACTAATCGCGC	GGGCACCCATCTAAGTACTAATCGCGCCCGATGTTGCTTAACTTCGGTGATCGGACGAGAACCGGTGTTTTCAAGATCGG	GGGCACCCATCTAAGTACTAATCGCGCCCGATGTTGCTTAACTTCAGTGATCGGACGAGAACTGGTGTTTTCAAGATCGGA	8	D1	CCGATGTTGCTTAACTTCGGTGATCGGA	CGAGAACCGGTGTTTTCAAGATCGGA	0.177778	{-----(-------------a---)-----}-		0.00380263	5S ribosomal RNA	PREDICTED: Uranotaenia lowii 5S ribosomal RNA (LOC129740736), rRNA	{'superkingdom': 'Eukaryota', 'phylum': 'Arthropoda', 'class': 'Insecta', 'order': 'Diptera', 'family': 'Culicidae', 'genus': 'Uranotaenia', 'species': 'Uranotaenia lowii'}	Uranotaenia lowii
GGGCACCCATCTAAGTACTAATCGCGC	GGGCACCCATCTAAGTACTAATCGCGCCCGATGTTGCTTAACTTCGGTGATCGGACGAGAACCGGTGTTTTCAAGATCGG	GGGCACCCATCTAAGTACTAATCGCGCCCGATGTTGCTTAACTTCAGTGATCGGACGAGAACTGGTGTTTTCAACAGATCG	7	D1	CCGATGTTGCTTAACTTCGGTGATCGGA	CGAGAACCGGTGTTTTCAAGATCGGA	0.155556	{-----(-------------a---)-----}-		0.00380263	5S ribosomal RNA	PREDICTED: Uranotaenia lowii 5S ribosomal RNA (LOC129740736), rRNA	{'superkingdom': 'Eukaryota', 'phylum': 'Arthropoda', 'class': 'Insecta', 'order': 'Diptera', 'family': 'Culicidae', 'genus': 'Uranotaenia', 'species': 'Uranotaenia lowii'}	Uranotaenia lowii
GGGCACCCATCTAAGTACTAATCGCGC	GGGCACCCATCTAAGTACTAATCGCGCCCGATGTTGCTTAACTTCGGTGATCGGACGAGAACCGGTGTTTTCAAGATCGG	GGGCACCCATCTAAGTACTAATCGCGCCCGATGTTGCTTAACTTCAGTGATCGGACGAGAACTGGTGTTTTCAGATCGGAA	7	D1	CCGATGTTGCTTAACTTCGGTGATCGGA	CGAGAACCGGTGTTTTCAAGATCGGA	0.155556	{-----(-------------a---)-----}-		0.00380263	5S ribosomal RNA	PREDICTED: Uranotaenia lowii 5S ribosomal RNA (LOC129740736), rRNA	{'superkingdom': 'Eukaryota', 'phylum': 'Arthropoda', 'class': 'Insecta', 'order': 'Diptera', 'family': 'Culicidae', 'genus': 'Uranotaenia', 'species': 'Uranotaenia lowii'}	Uranotaenia lowii
GGGCACCCATCTAAGTACTAATCGCGC	GGGCACCCATCTAAGTACTAATCGCGCCCGATGTTGCTTAACTTCGGTGATCGGACGAGAACCGGTGTTTTCAAGATCGG	GGGCACCCATCTAAGTACTAATCGCGCCCGATGTTGCTTAACTTCAGTGATCGGACGAGAACTGGTGTTTTCAAAGATCGG	4	D1	CCGATGTTGCTTAACTTCGGTGATCGGA	CGAGAACCGGTGTTTTCAAGATCGGA	0.0888889	{-----(-------------a---)-----}-		0.00380263	5S ribosomal RNA	PREDICTED: Uranotaenia lowii 5S ribosomal RNA (LOC129740736), rRNA	{'superkingdom': 'Eukaryota', 'phylum': 'Arthropoda', 'class': 'Insecta', 'order': 'Diptera', 'family': 'Culicidae', 'genus': 'Uranotaenia', 'species': 'Uranotaenia lowii'}	Uranotaenia lowii
GGGCACCCATCTAAGTACTAATCGCGC	GGGCACCCATCTAAGTACTAATCGCGCCCGATGTTGCTTAACTTCGGTGATCGGACGAGAACCGGTGTTTTCAAGATCGG	GGGCACCCATCTAAGTACTAATCGCGCCCGATGTTGCTTAACTTCGGTGATCGGACGAGAACCGGTGTTTTCAAAGATCGG	4	D1	CCGATGTTGCTTAACTTCGGTGATCGGA	CGAGAACCGGTGTTTTCAAGATCGGA	0.0888889	{-----(-----------------)-----}-		0.00380263	5S ribosomal RNA	PREDICTED: Uranotaenia lowii 5S ribosomal RNA (LOC129740736), rRNA	{'superkingdom': 'Eukaryota', 'phylum': 'Arthropoda', 'class': 'Insecta', 'order': 'Diptera', 'family': 'Culicidae', 'genus': 'Uranotaenia', 'species': 'Uranotaenia lowii'}	Uranotaenia lowii
GGGCACCCATCTAAGTACTAATCGCGC	GGGCACCCATCTAAGTACTAATCGCGCCCGATGTTGCTTAACTTCGGTGATCGGACGAGAACCGGTGTTTTCAAGATCGG	GGGCACCCATCTAAGTACTAATCGCGCCCGATGTTGCTTAACTTCAGTGATCGGACGAGAACTGGTGTTTTCAACATGGAG	3	D1	CCGATGTTGCTTAACTTCGGTGATCGGA	CGAGAACCGGTGTTTTCAAGATCGGA	0.0666667	{-----(-------------a---)-----}-		0.00380263	5S ribosomal RNA	PREDICTED: Uranotaenia lowii 5S ribosomal RNA (LOC129740736), rRNA	{'superkingdom': 'Eukaryota', 'phylum': 'Arthropoda', 'class': 'Insecta', 'order': 'Diptera', 'family': 'Culicidae', 'genus': 'Uranotaenia', 'species': 'Uranotaenia lowii'}	Uranotaenia lowii
GGGCACCCATCTAAGTACTAATCGCGC	GGGCACCCATCTAAGTACTAATCGCGCCCGATGTTGCTTAACTTCGGTGATCGGACGAGAACCGGTGTTTTCAAGATCGG	GGGCACCCATCTAAGTACTAATCGCGCCCGATGTTGCTTAACTTCAGTGATCGGACGAGAACTGGTGTTTTCAACATGGTA	3	D1	CCGATGTTGCTTAACTTCGGTGATCGGA	CGAGAACCGGTGTTTTCAAGATCGGA	0.0666667	{-----(-------------a---)-----}-		0.00380263	5S ribosomal RNA	PREDICTED: Uranotaenia lowii 5S ribosomal RNA (LOC129740736), rRNA	{'superkingdom': 'Eukaryota', 'phylum': 'Arthropoda', 'class': 'Insecta', 'order': 'Diptera', 'family': 'Culicidae', 'genus': 'Uranotaenia', 'species': 'Uranotaenia lowii'}	Uranotaenia lowii
TTCATGTGTCCTGCAGTTCGCATTCTG	TTCATGTGTCCTGCAGTTCGCATTCTGACGCGCATTTAGCTGCGGTCTTCATCGATCCACGAGCCGAGTGATCCCCAGATC	TTCATGTGTCCTGCAGTTCGCATTCTGACGCGCATTTAGCTGCGGTCTTCATCGATCCACGAGCCGAGTGATCCAGATCGG	3	D2	ACGCGCATTTAGCTTCCACGAGCCGAG	GCGGTCTTCATCGATGATCCCCAGATC	0.333333		-------{-----()-----}---ag-tcgg	0.00388346	5.8S ribosomal RNA		{'superkingdom': 'Eukaryota', 'phylum': 'Arthropoda', 'class': 'Insecta', 'order': 'Diptera', 'family': 'Culicidae', 'genus': 'Topomyia', 'species': 'Topomyia yanbarensis'}	Topomyia yanbarensis
TTCATGTGTCCTGCAGTTCGCATTCTG	TTCATGTGTCCTGCAGTTCGCATTCTGACGCGCATTTAGCTGCGGTCTTCATCGATCCACGAGCCGAGTGATCCCCAGATC	TTCATGTGTCCTGCAGTTCGCATTCTGACGCGCATTTAGCTGCGGTCTTCATCGATCCACGAGCCGAGTGATCAGATCGGA	2	D2	ACGCGCATTTAGCTTCCACGAGCCGAG	GCGGTCTTCATCGATGATCCCCAGATC	0.222222		-------{-----()-----}--agatcgga	0.00388346	5.8S ribosomal RNA		{'superkingdom': 'Eukaryota', 'phylum': 'Arthropoda', 'class': 'Insecta', 'order': 'Diptera', 'family': 'Culicidae', 'genus': 'Topomyia', 'species': 'Topomyia yanbarensis'}	Topomyia yanbarensis
TTCATGTGTCCTGCAGTTCGCATTCTG	TTCATGTGTCCTGCAGTTCGCATTCTGACGCGCATTTAGCTGCGGTCTTCATCGATCCACGAGCCGAGTGATCCCCAGATC	TTCATGTGTCCTGCAGTTCGCATTCTGACGCGCATTTAGCTGCGGTCTTCATCGATCCACGAGCCGAGTGATCCCAGATCG	2	D2	ACGCGCATTTAGCTTCCACGAGCCGAG	GCGGTCTTCATCGATGATCCCCAGATC	0.222222		-------{-----()-----}----agatcg	0.00388346	5.8S ribosomal RNA		{'superkingdom': 'Eukaryota', 'phylum': 'Arthropoda', 'class': 'Insecta', 'order': 'Diptera', 'family': 'Culicidae', 'genus': 'Topomyia', 'species': 'Topomyia yanbarensis'}	Topomyia yanbarensis
TTCATGTGTCCTGCAGTTCGCATTCTG	TTCATGTGTCCTGCAGTTCGCATTCTGACGCGCATTTAGCTGCGGTCTTCATCGATCCACGAGCCGAGTGATCCCCAGATC	TTCATGTGTCCTGCAGTTCGCATTCTGACGCGCATTTAGCTGCGGTCTTCATCGATCCACGAGCCGAGTGATCCCCTAGAT	2	D2	ACGCGCATTTAGCTTCCACGAGCCGAG	GCGGTCTTCATCGATGATCCCCAGATC	0.222222		-------{-----()-----}-----tagat	0.00388346	5.8S ribosomal RNA		{'superkingdom': 'Eukaryota', 'phylum': 'Arthropoda', 'class': 'Insecta', 'order': 'Diptera', 'family': 'Culicidae', 'genus': 'Topomyia', 'species': 'Topomyia yanbarensis'}	Topomyia yanbarensis
TCATGTGTCCAGCAGTTCACATTCTGA	TCATGTGTCCAGCAGTTCACATTCTGACGCGCATTTAGCTGCGGTCTTCATCGATCCACGAGCCGAGTGATCCCCAGATCG	TCATGTGTCCAGCAGTTCACATTCTGACGCGCATTTAGCTGCGGTCTTCATCGATCCACGAGCCGAGTGATCCAGATCGGA	46	D2	CGCGCATTTAGCTGCCACGAGCCGAGT	CGGTCTTCATCGATGATCCCCAGATCG	0.304636		------{-----()-----}---ag-tcgga	0.00389725	5.8S ribosomal RNA		{'superkingdom': 'Eukaryota', 'phylum': 'Arthropoda', 'class': 'Insecta', 'order': 'Diptera', 'family': 'Culicidae', 'genus': 'Malaya', 'species': 'Malaya genurostris'}	Malaya genurostris
TCATGTGTCCAGCAGTTCACATTCTGA	TCATGTGTCCAGCAGTTCACATTCTGACGCGCATTTAGCTGCGGTCTTCATCGATCCACGAGCCGAGTGATCCCCAGATCG	TCATGTGTCCAGCAGTTCACATTCTGACGCGCATTTAGCTGCGGTCTTCATCGATCCACGAGCCGAGTGATCCCCTGAGAT	34	D2	CGCGCATTTAGCTGCCACGAGCCGAGT	CGGTCTTCATCGATGATCCCCAGATCG	0.225166		------{-----()-----}-----t--gat	0.00389725	5.8S ribosomal RNA		{'superkingdom': 'Eukaryota', 'phylum': 'Arthropoda', 'class': 'Insecta', 'order': 'Diptera', 'family': 'Culicidae', 'genus': 'Malaya', 'species': 'Malaya genurostris'}	Malaya genurostris
TCATGTGTCCAGCAGTTCACATTCTGA	TCATGTGTCCAGCAGTTCACATTCTGACGCGCATTTAGCTGCGGTCTTCATCGATCCACGAGCCGAGTGATCCCCAGATCG	TCATGTGTCCAGCAGTTCACATTCTGACGCGCATTTAGCTGCGGTCTTCATCGATCCACGAGCCGAGTGATCAGATCGGAA	31	D2	CGCGCATTTAGCTGCCACGAGCCGAGT	CGGTCTTCATCGATGATCCCCAGATCG	0.205298		------{-----()-----}--agatcggaa	0.00389725	5.8S ribosomal RNA		{'superkingdom': 'Eukaryota', 'phylum': 'Arthropoda', 'class': 'Insecta', 'order': 'Diptera', 'family': 'Culicidae', 'genus': 'Malaya', 'species': 'Malaya genurostris'}	Malaya genurostris
TCATGTGTCCAGCAGTTCACATTCTGA	TCATGTGTCCAGCAGTTCACATTCTGACGCGCATTTAGCTGCGGTCTTCATCGATCCACGAGCCGAGTGATCCCCAGATCG	TCATGTGTCCAGCAGTTCACATTCTGACGCGCATTTAGCTGCGGTCTTCATCGATCCACGAGCCGAGTGATCCCAGATCGG	21	D2	CGCGCATTTAGCTGCCACGAGCCGAGT	CGGTCTTCATCGATGATCCCCAGATCG	0.139073		------{-----()-----}----agatcg-	0.00389725	5.8S ribosomal RNA		{'superkingdom': 'Eukaryota', 'phylum': 'Arthropoda', 'class': 'Insecta', 'order': 'Diptera', 'family': 'Culicidae', 'genus': 'Malaya', 'species': 'Malaya genurostris'}	Malaya genurostris
TCATGTGTCCAGCAGTTCACATTCTGA	TCATGTGTCCAGCAGTTCACATTCTGACGCGCATTTAGCTGCGGTCTTCATCGATCCACGAGCCGAGTGATCCCCAGATCG	TCATGTGTCCAGCAGTTCACATTCTGACGCGCATTTAGCTGCGGTCTTCATCGATCCACGAGCCGAGTGATCCCCTAGATC	19	D2	CGCGCATTTAGCTGCCACGAGCCGAGT	CGGTCTTCATCGATGATCCCCAGATCG	0.125828		------{-----()-----}-----tagatc	0.00389725	5.8S ribosomal RNA		{'superkingdom': 'Eukaryota', 'phylum': 'Arthropoda', 'class': 'Insecta', 'order': 'Diptera', 'family': 'Culicidae', 'genus': 'Malaya', 'species': 'Malaya genurostris'}	Malaya genurostris
CTCTCAGGCCGGCTACCCGTCGTCGCC	CTCTCAGGCCGGCTACCCGTCGTCGCCTTGGTAGGCCATTACCCCACCAACAAGCTGATAGGCCGCGGGCCCATCCCACA	CTCTCAGGCCGGCTACCCGTCGTCGCCTTGGTAGGCCATTACCCCACCAACAAGCTGATAGGCCGCGGGCCCATCCTGCAC	4	D1	TTGGTAGGCCATTACCCCACCAACAAGC	TGATAGGCCGCGGGCCCATCCCACAC	0.266667	{-----(-------------)-----}-----		0.00391736	16S ribosomal RNA	Mycobacterium sp. strain Y3 16S ribosomal RNA gene, partial sequence	{'superkingdom': 'Bacteria', 'phylum': 'Actinomycetota', 'class': 'Actinomycetes', 'order': 'Mycobacteriales', 'family': 'Mycobacteriaceae', 'genus': 'Mycobacterium', 'species': 'Mycobacterium sp.'}	Mycobacterium sp.
CTCTCAGGCCGGCTACCCGTCGTCGCC	CTCTCAGGCCGGCTACCCGTCGTCGCCTTGGTAGGCCATTACCCCACCAACAAGCTGATAGGCCGCGGGCCCATCCCACA	CTCTCAGGCCGGCTACCCGTCGTCGCCTTGGTAGGCCATTACCCCACCAACAAGCTGATAGGCCGCGGGCCCATCCCCAGC	3	D1	TTGGTAGGCCATTACCCCACCAACAAGC	TGATAGGCCGCGGGCCCATCCCACAC	0.2	{-----(-------------)-----}-----		0.00391736	16S ribosomal RNA	Mycobacterium sp. strain Y3 16S ribosomal RNA gene, partial sequence	{'superkingdom': 'Bacteria', 'phylum': 'Actinomycetota', 'class': 'Actinomycetes', 'order': 'Mycobacteriales', 'family': 'Mycobacteriaceae', 'genus': 'Mycobacterium', 'species': 'Mycobacterium sp.'}	Mycobacterium sp.
CTCTCAGGCCGGCTACCCGTCGTCGCC	CTCTCAGGCCGGCTACCCGTCGTCGCCTTGGTAGGCCATTACCCCACCAACAAGCTGATAGGCCGCGGGCCCATCCCACA	CTCTCAGGCCGGCTACCCGTCGTCGCCTTGGTGAGCCATTACCTCACCAACAAGCTGATAGGCCGCGAGCCCATCCCCCAC	2	D1	TTGGTAGGCCATTACCCCACCAACAAGC	TGATAGGCCGCGGGCCCATCCCACAC	0.133333	{-----(ga---------t-)-----}-----		0.00391736	16S ribosomal RNA	Mycobacterium sp. strain Y3 16S ribosomal RNA gene, partial sequence	{'superkingdom': 'Bacteria', 'phylum': 'Actinomycetota', 'class': 'Actinomycetes', 'order': 'Mycobacteriales', 'family': 'Mycobacteriaceae', 'genus': 'Mycobacterium', 'species': 'Mycobacterium sp.'}	Mycobacterium sp.
CTCTCAGGCCGGCTACCCGTCGTCGCC	CTCTCAGGCCGGCTACCCGTCGTCGCCTTGGTAGGCCATTACCCCACCAACAAGCTGATAGGCCGCGGGCCCATCCCACA	CTCTCAGGCCGGCTACCCGTCGTCGCCTTGGTGAGCCATTACCTCACCAACAAGCTGATAGGCCGCGAGCCCATCCCTGAC	2	D1	TTGGTAGGCCATTACCCCACCAACAAGC	TGATAGGCCGCGGGCCCATCCCACAC	0.133333	{-----(ga---------t-)-----}-----		0.00391736	16S ribosomal RNA	Mycobacterium sp. strain Y3 16S ribosomal RNA gene, partial sequence	{'superkingdom': 'Bacteria', 'phylum': 'Actinomycetota', 'class': 'Actinomycetes', 'order': 'Mycobacteriales', 'family': 'Mycobacteriaceae', 'genus': 'Mycobacterium', 'species': 'Mycobacterium sp.'}	Mycobacterium sp.
CTCTCAGGCCGGCTACCCGTCGTCGCC	CTCTCAGGCCGGCTACCCGTCGTCGCCTTGGTAGGCCATTACCCCACCAACAAGCTGATAGGCCGCGGGCCCATCCCACA	CTCTCAGGCCGGCTACCCGTCGTCGCCTTGGTGAGCCATTACCTCACCAACAAGCTGATAGGCCGTGAGCCCATCCAAAAC	2	D1	TTGGTAGGCCATTACCCCACCAACAAGC	TGATAGGCCGCGGGCCCATCCCACAC	0.133333	{-----(ga---------t-)-----}-----		0.00391736	16S ribosomal RNA	Mycobacterium sp. strain Y3 16S ribosomal RNA gene, partial sequence	{'superkingdom': 'Bacteria', 'phylum': 'Actinomycetota', 'class': 'Actinomycetes', 'order': 'Mycobacteriales', 'family': 'Mycobacteriaceae', 'genus': 'Mycobacterium', 'species': 'Mycobacterium sp.'}	Mycobacterium sp.
CTCTCAGGCCGGCTACCCGTCGTCGCC	CTCTCAGGCCGGCTACCCGTCGTCGCCTTGGTAGGCCATTACCCCACCAACAAGCTGATAGGCCGCGGGCCCATCCCACA	CTCTCAGGCCGGCTACCCGTCGTCGCCTTGGTGGGCCATTACCTCACCAACTAGCTGATAGGCCGCGAGTCCATCCTTGAC	2	D1	TTGGTAGGCCATTACCCCACCAACAAGC	TGATAGGCCGCGGGCCCATCCCACAC	0.133333	{-----(g----------t-)-----}-t---		0.00391736	16S ribosomal RNA	Mycobacterium sp. strain Y3 16S ribosomal RNA gene, partial sequence	{'superkingdom': 'Bacteria', 'phylum': 'Actinomycetota', 'class': 'Actinomycetes', 'order': 'Mycobacteriales', 'family': 'Mycobacteriaceae', 'genus': 'Mycobacterium', 'species': 'Mycobacterium sp.'}	Mycobacterium sp.
CCCCACACTACCATCGGCGCTACGGCG	CCCCACACTACCATCGGCGCTACGGCGTTTCACTGCTGAGTTCGGCATGGGGTCAGGTGGGACCACCGCGAGATCGGAAG	CCCCACACTACCATCGGCGCTACGGCGTTTCACTGCTGAGTTCGGCATGGGGTCAGGTGGGACCACCGCGCTAGATCGGAA	15	D2	TTTCACTGCTGAGTGGTGGGACCACCG	TCGGCATGGGGTCACGAGATCGGAAGA	0.333333	------------{-----(---)-----}--		0.00391775	5S ribosomal RNA	Photorhabdus temperata FFPRI_2 DNA, complete genome	{'superkingdom': 'Bacteria', 'phylum': 'Pseudomonadota', 'class': 'Gammaproteobacteria', 'order': 'Enterobacterales', 'family': 'Morganellaceae', 'genus': 'Photorhabdus', 'species': 'Photorhabdus temperata'}	Photorhabdus temperata
CCCCACACTACCATCGGCGCTACGGCG	CCCCACACTACCATCGGCGCTACGGCGTTTCACTGCTGAGTTCGGCATGGGGTCAGGTGGGACCACCGCGAGATCGGAAG	CCCCACACTACCATCGGCGCTACGGCGTTTCACTGCTGAGTTCGGCATGGGGTCAGGTGGGACCACCGCGCAGATCGGAAG	10	D2	TTTCACTGCTGAGTGGTGGGACCACCG	TCGGCATGGGGTCACGAGATCGGAAGA	0.222222	------------{-----(---)-----}--		0.00391775		Photorhabdus temperata FFPRI_2 DNA, complete genome	{'superkingdom': 'Bacteria', 'phylum': 'Pseudomonadota', 'class': 'Gammaproteobacteria', 'order': 'Enterobacterales', 'family': 'Morganellaceae', 'genus': 'Photorhabdus', 'species': 'Photorhabdus temperata'}	Photorhabdus temperata
CCCCACACTACCATCGGCGCTACGGCG	CCCCACACTACCATCGGCGCTACGGCGTTTCACTGCTGAGTTCGGCATGGGGTCAGGTGGGACCACCGCGAGATCGGAAG	CCCCACACTACCATCGGCGCTACGGCGTTTCACTGCTGAGTTCGGCATGGGGTCAGGTGGGACCACCGCGCTATTAGATCG	8	D2	TTTCACTGCTGAGTGGTGGGACCACCG	TCGGCATGGGGTCACGAGATCGGAAGA	0.177778	------------{-----(---)-----}--		0.00391775	5S ribosomal RNA	Photorhabdus temperata FFPRI_2 DNA, complete genome	{'superkingdom': 'Bacteria', 'phylum': 'Pseudomonadota', 'class': 'Gammaproteobacteria', 'order': 'Enterobacterales', 'family': 'Morganellaceae', 'genus': 'Photorhabdus', 'species': 'Photorhabdus temperata'}	Photorhabdus temperata
CCCCACACTACCATCGGCGCTACGGCG	CCCCACACTACCATCGGCGCTACGGCGTTTCACTGCTGAGTTCGGCATGGGGTCAGGTGGGACCACCGCGAGATCGGAAG	CCCCACACTACCATCGGCGCTACGGCGTTTCACTGCTGAGTTCGGCATGGGGTCAGGTGGGACCACCGCGCTATTGCCGAG	8	D2	TTTCACTGCTGAGTGGTGGGACCACCG	TCGGCATGGGGTCACGAGATCGGAAGA	0.177778	------------{-----(---)-----}--		0.00391775	5S ribosomal RNA	Photorhabdus temperata FFPRI_2 DNA, complete genome	{'superkingdom': 'Bacteria', 'phylum': 'Pseudomonadota', 'class': 'Gammaproteobacteria', 'order': 'Enterobacterales', 'family': 'Morganellaceae', 'genus': 'Photorhabdus', 'species': 'Photorhabdus temperata'}	Photorhabdus temperata
CCCCACACTACCATCGGCGCTACGGCG	CCCCACACTACCATCGGCGCTACGGCGTTTCACTGCTGAGTTCGGCATGGGGTCAGGTGGGACCACCGCGAGATCGGAAG	CCCCACACTACCATCGGCGCTACGGCGTTTCACTGCTGAGTTCGGCATGGGGTCAGGTGGGACCACCGCGCTAAGATCGGA	4	D2	TTTCACTGCTGAGTGGTGGGACCACCG	TCGGCATGGGGTCACGAGATCGGAAGA	0.0888889	------------{-----(---)-----}--		0.00391775	5S ribosomal RNA	Photorhabdus temperata FFPRI_2 DNA, complete genome	{'superkingdom': 'Bacteria', 'phylum': 'Pseudomonadota', 'class': 'Gammaproteobacteria', 'order': 'Enterobacterales', 'family': 'Morganellaceae', 'genus': 'Photorhabdus', 'species': 'Photorhabdus temperata'}	Photorhabdus temperata
CCCCACACTACCATCGGCGCTACGGCG	CCCCACACTACCATCGGCGCTACGGCGTTTCACTGCTGAGTTCGGCATGGGGTCAGGTGGGACCACCGCGAGATCGGAAG	CCCCACACTACCATCGGCGCTACGGCGTTTCACTGCTGAGTTCGGCATGGGGTCAGGTGGGACCACCGCGCTAGATCGGAA	15	D3	TTTCACTGCTGAGTCGAGATCGGAAGA	TCGGCATGGGGTCAGGTGGGACCACCG	0.333333		--------------{-----(--)-----}-	0.00391775	5S ribosomal RNA	Photorhabdus temperata FFPRI_2 DNA, complete genome	{'superkingdom': 'Bacteria', 'phylum': 'Pseudomonadota', 'class': 'Gammaproteobacteria', 'order': 'Enterobacterales', 'family': 'Morganellaceae', 'genus': 'Photorhabdus', 'species': 'Photorhabdus temperata'}	Photorhabdus temperata
CCCCACACTACCATCGGCGCTACGGCG	CCCCACACTACCATCGGCGCTACGGCGTTTCACTGCTGAGTTCGGCATGGGGTCAGGTGGGACCACCGCGAGATCGGAAG	CCCCACACTACCATCGGCGCTACGGCGTTTCACTGCTGAGTTCGGCATGGGGTCAGGTGGGACCACCGCGCAGATCGGAAG	10	D3	TTTCACTGCTGAGTCGAGATCGGAAGA	TCGGCATGGGGTCAGGTGGGACCACCG	0.222222		--------------{-----(--)-----}-	0.00391775		Photorhabdus temperata FFPRI_2 DNA, complete genome	{'superkingdom': 'Bacteria', 'phylum': 'Pseudomonadota', 'class': 'Gammaproteobacteria', 'order': 'Enterobacterales', 'family': 'Morganellaceae', 'genus': 'Photorhabdus', 'species': 'Photorhabdus temperata'}	Photorhabdus temperata
CCCCACACTACCATCGGCGCTACGGCG	CCCCACACTACCATCGGCGCTACGGCGTTTCACTGCTGAGTTCGGCATGGGGTCAGGTGGGACCACCGCGAGATCGGAAG	CCCCACACTACCATCGGCGCTACGGCGTTTCACTGCTGAGTTCGGCATGGGGTCAGGTGGGACCACCGCGCTATTAGATCG	8	D3	TTTCACTGCTGAGTCGAGATCGGAAGA	TCGGCATGGGGTCAGGTGGGACCACCG	0.177778		--------------{-----(--)-----}-	0.00391775	5S ribosomal RNA	Photorhabdus temperata FFPRI_2 DNA, complete genome	{'superkingdom': 'Bacteria', 'phylum': 'Pseudomonadota', 'class': 'Gammaproteobacteria', 'order': 'Enterobacterales', 'family': 'Morganellaceae', 'genus': 'Photorhabdus', 'species': 'Photorhabdus temperata'}	Photorhabdus temperata
CCCCACACTACCATCGGCGCTACGGCG	CCCCACACTACCATCGGCGCTACGGCGTTTCACTGCTGAGTTCGGCATGGGGTCAGGTGGGACCACCGCGAGATCGGAAG	CCCCACACTACCATCGGCGCTACGGCGTTTCACTGCTGAGTTCGGCATGGGGTCAGGTGGGACCACCGCGCTATTGCCGAG	8	D3	TTTCACTGCTGAGTCGAGATCGGAAGA	TCGGCATGGGGTCAGGTGGGACCACCG	0.177778		--------------{-----(--)-----}-	0.00391775	5S ribosomal RNA	Photorhabdus temperata FFPRI_2 DNA, complete genome	{'superkingdom': 'Bacteria', 'phylum': 'Pseudomonadota', 'class': 'Gammaproteobacteria', 'order': 'Enterobacterales', 'family': 'Morganellaceae', 'genus': 'Photorhabdus', 'species': 'Photorhabdus temperata'}	Photorhabdus temperata
CCCCACACTACCATCGGCGCTACGGCG	CCCCACACTACCATCGGCGCTACGGCGTTTCACTGCTGAGTTCGGCATGGGGTCAGGTGGGACCACCGCGAGATCGGAAG	CCCCACACTACCATCGGCGCTACGGCGTTTCACTGCTGAGTTCGGCATGGGGTCAGGTGGGACCACCGCGCTAAGATCGGA	4	D3	TTTCACTGCTGAGTCGAGATCGGAAGA	TCGGCATGGGGTCAGGTGGGACCACCG	0.0888889		--------------{-----(--)-----}-	0.00391775	5S ribosomal RNA	Photorhabdus temperata FFPRI_2 DNA, complete genome	{'superkingdom': 'Bacteria', 'phylum': 'Pseudomonadota', 'class': 'Gammaproteobacteria', 'order': 'Enterobacterales', 'family': 'Morganellaceae', 'genus': 'Photorhabdus', 'species': 'Photorhabdus temperata'}	Photorhabdus temperata
CCCCACACTACCATCGGCGCTACGGCG	CCCCACACTACCATCGGCGCTACGGCGTTTCACTGCTGAGTTCGGCATGGGGTCAGGTGGGACCACCGCGAGATCGGAAG	CCCCACACTACCATCGGCGCTACGGCGTTTCACTGCTGAGTTCGGCATGGGGTCAGGTGGGACCACCGCGCTAGATCGGAA	15	D1	TTTCACTGCTGAGTTCGGCATGGGGTCA	GGTGGGACCACCGCGAGATCGGAAGA	0.333333		{-----(--)-----}---ct-gatcgga-	0.00391966	5S ribosomal RNA	Photorhabdus temperata FFPRI_2 DNA, complete genome	{'superkingdom': 'Bacteria', 'phylum': 'Pseudomonadota', 'class': 'Gammaproteobacteria', 'order': 'Enterobacterales', 'family': 'Morganellaceae', 'genus': 'Photorhabdus', 'species': 'Photorhabdus temperata'}	Photorhabdus temperata
CCCCACACTACCATCGGCGCTACGGCG	CCCCACACTACCATCGGCGCTACGGCGTTTCACTGCTGAGTTCGGCATGGGGTCAGGTGGGACCACCGCGAGATCGGAAG	CCCCACACTACCATCGGCGCTACGGCGTTTCACTGCTGAGTTCGGCATGGGGTCAGGTGGGACCACCGCGCAGATCGGAAG	10	D1	TTTCACTGCTGAGTTCGGCATGGGGTCA	GGTGGGACCACCGCGAGATCGGAAGA	0.222222		{-----(--)-----}---cagatc-g-ag	0.00391966		Photorhabdus temperata FFPRI_2 DNA, complete genome	{'superkingdom': 'Bacteria', 'phylum': 'Pseudomonadota', 'class': 'Gammaproteobacteria', 'order': 'Enterobacterales', 'family': 'Morganellaceae', 'genus': 'Photorhabdus', 'species': 'Photorhabdus temperata'}	Photorhabdus temperata
CCCCACACTACCATCGGCGCTACGGCG	CCCCACACTACCATCGGCGCTACGGCGTTTCACTGCTGAGTTCGGCATGGGGTCAGGTGGGACCACCGCGAGATCGGAAG	CCCCACACTACCATCGGCGCTACGGCGTTTCACTGCTGAGTTCGGCATGGGGTCAGGTGGGACCACCGCGCTATTAGATCG	8	D1	TTTCACTGCTGAGTTCGGCATGGGGTCA	GGTGGGACCACCGCGAGATCGGAAGA	0.177778		{-----(--)-----}---ct--ta--tcg	0.00391966	5S ribosomal RNA	Photorhabdus temperata FFPRI_2 DNA, complete genome	{'superkingdom': 'Bacteria', 'phylum': 'Pseudomonadota', 'class': 'Gammaproteobacteria', 'order': 'Enterobacterales', 'family': 'Morganellaceae', 'genus': 'Photorhabdus', 'species': 'Photorhabdus temperata'}	Photorhabdus temperata
CCCCACACTACCATCGGCGCTACGGCG	CCCCACACTACCATCGGCGCTACGGCGTTTCACTGCTGAGTTCGGCATGGGGTCAGGTGGGACCACCGCGAGATCGGAAG	CCCCACACTACCATCGGCGCTACGGCGTTTCACTGCTGAGTTCGGCATGGGGTCAGGTGGGACCACCGCGCTATTGCCGAG	8	D1	TTTCACTGCTGAGTTCGGCATGGGGTCA	GGTGGGACCACCGCGAGATCGGAAGA	0.177778		{-----(--)-----}---ct--t-ccgag	0.00391966	5S ribosomal RNA	Photorhabdus temperata FFPRI_2 DNA, complete genome	{'superkingdom': 'Bacteria', 'phylum': 'Pseudomonadota', 'class': 'Gammaproteobacteria', 'order': 'Enterobacterales', 'family': 'Morganellaceae', 'genus': 'Photorhabdus', 'species': 'Photorhabdus temperata'}	Photorhabdus temperata
CCCCACACTACCATCGGCGCTACGGCG	CCCCACACTACCATCGGCGCTACGGCGTTTCACTGCTGAGTTCGGCATGGGGTCAGGTGGGACCACCGCGAGATCGGAAG	CCCCACACTACCATCGGCGCTACGGCGTTTCACTGCTGAGTTCGGCATGGGGTCAGGTGGGACCACCGCGCTAAGATCGGA	4	D1	TTTCACTGCTGAGTTCGGCATGGGGTCA	GGTGGGACCACCGCGAGATCGGAAGA	0.0888889		{-----(--)-----}---ct-agatcg--	0.00391966	5S ribosomal RNA	Photorhabdus temperata FFPRI_2 DNA, complete genome	{'superkingdom': 'Bacteria', 'phylum': 'Pseudomonadota', 'class': 'Gammaproteobacteria', 'order': 'Enterobacterales', 'family': 'Morganellaceae', 'genus': 'Photorhabdus', 'species': 'Photorhabdus temperata'}	Photorhabdus temperata
TTCATGTGTCCTGCAGTTCACATTCTG	TTCATGTGTCCTGCAGTTCACATTCTGACGCGCATTTAGCTGCGGTCTTCATCGATCCACGAGCCGAGTGATCCCCAGATC	TTCATGTGTCCTGCAGTTCACATTCTGACGCGCATTTAGCTGCGGTCTTCATCGATCCACGAGCCGAGTGATCCAGATCGG	23374	D2	ACGCGCATTTAGCTTCCACGAGCCGAG	GCGGTCTTCATCGATGATCCCCAGATC	0.246795		-------{-----()-----}---ag-tcgg	0.00399247	5.8S ribosomal RNA	PREDICTED: Malaya genurostris 5.8S ribosomal RNA (LOC131433328), rRNA	{'superkingdom': 'Eukaryota', 'phylum': 'Arthropoda', 'class': 'Insecta', 'order': 'Diptera', 'family': 'Culicidae', 'genus': 'Malaya', 'species': 'Malaya genurostris'}	Malaya genurostris
TTCATGTGTCCTGCAGTTCACATTCTG	TTCATGTGTCCTGCAGTTCACATTCTGACGCGCATTTAGCTGCGGTCTTCATCGATCCACGAGCCGAGTGATCCCCAGATC	TTCATGTGTCCTGCAGTTCACATTCTGACGCGCATTTAGCTGCGGTCTTCATCGATCCACGAGCCGAGTGATCCCAGATCG	16980	D2	ACGCGCATTTAGCTTCCACGAGCCGAG	GCGGTCTTCATCGATGATCCCCAGATC	0.179284		-------{-----()-----}----agatcg	0.00399247	5.8S ribosomal RNA	PREDICTED: Malaya genurostris 5.8S ribosomal RNA (LOC131433328), rRNA	{'superkingdom': 'Eukaryota', 'phylum': 'Arthropoda', 'class': 'Insecta', 'order': 'Diptera', 'family': 'Culicidae', 'genus': 'Malaya', 'species': 'Malaya genurostris'}	Malaya genurostris
TTCATGTGTCCTGCAGTTCACATTCTG	TTCATGTGTCCTGCAGTTCACATTCTGACGCGCATTTAGCTGCGGTCTTCATCGATCCACGAGCCGAGTGATCCCCAGATC	TTCATGTGTCCTGCAGTTCACATTCTGACGCGCATTTAGCTGCGGTCTTCATCGATCCACGAGCCGAGTGATCAGATCGGA	16424	D2	ACGCGCATTTAGCTTCCACGAGCCGAG	GCGGTCTTCATCGATGATCCCCAGATC	0.173414		-------{-----()-----}--agatcgga	0.00399247	5.8S ribosomal RNA	PREDICTED: Malaya genurostris 5.8S ribosomal RNA (LOC131433328), rRNA	{'superkingdom': 'Eukaryota', 'phylum': 'Arthropoda', 'class': 'Insecta', 'order': 'Diptera', 'family': 'Culicidae', 'genus': 'Malaya', 'species': 'Malaya genurostris'}	Malaya genurostris
TTCATGTGTCCTGCAGTTCACATTCTG	TTCATGTGTCCTGCAGTTCACATTCTGACGCGCATTTAGCTGCGGTCTTCATCGATCCACGAGCCGAGTGATCCCCAGATC	TTCATGTGTCCTGCAGTTCACATTCTGACGCGCATTTAGCTGCGGTCTTCATCGATCCACGAGCCGAGTGATCCCCTGAGA	14646	D2	ACGCGCATTTAGCTTCCACGAGCCGAG	GCGGTCTTCATCGATGATCCCCAGATC	0.15464		-------{-----()-----}-----t--ga	0.00399247	5.8S ribosomal RNA	PREDICTED: Malaya genurostris 5.8S ribosomal RNA (LOC131433328), rRNA	{'superkingdom': 'Eukaryota', 'phylum': 'Arthropoda', 'class': 'Insecta', 'order': 'Diptera', 'family': 'Culicidae', 'genus': 'Malaya', 'species': 'Malaya genurostris'}	Malaya genurostris
TTCATGTGTCCTGCAGTTCACATTCTG	TTCATGTGTCCTGCAGTTCACATTCTGACGCGCATTTAGCTGCGGTCTTCATCGATCCACGAGCCGAGTGATCCCCAGATC	TTCATGTGTCCTGCAGTTCACATTCTGACGCGCATTTAGCTGCGGTCTTCATCGATCCACGAGCCGAGTGATCCCCTAGAT	8248	D2	ACGCGCATTTAGCTTCCACGAGCCGAG	GCGGTCTTCATCGATGATCCCCAGATC	0.0870869		-------{-----()-----}-----tagat	0.00399247	5.8S ribosomal RNA	PREDICTED: Malaya genurostris 5.8S ribosomal RNA (LOC131433328), rRNA	{'superkingdom': 'Eukaryota', 'phylum': 'Arthropoda', 'class': 'Insecta', 'order': 'Diptera', 'family': 'Culicidae', 'genus': 'Malaya', 'species': 'Malaya genurostris'}	Malaya genurostris
TTCATGTGTCCTGCAGTTCACATTCTG	TTCATGTGTCCTGCAGTTCACATTCTGACGCGCATTTAGCTGCGGTCTTCATCGATCCACGAGCCGAGTGATCCCCAGATC	TTCATGTGTCCTGCAGTTCACATTCTGACGCGCATTTAGCTGCGGTCTTCATCGATCCACGAGCCGAGTGATCCCCTGCCT	7717	D2	ACGCGCATTTAGCTTCCACGAGCCGAG	GCGGTCTTCATCGATGATCCCCAGATC	0.0814803		-------{-----()-----}-----t-cct	0.00399247	5.8S ribosomal RNA	PREDICTED: Malaya genurostris 5.8S ribosomal RNA (LOC131433328), rRNA	{'superkingdom': 'Eukaryota', 'phylum': 'Arthropoda', 'class': 'Insecta', 'order': 'Diptera', 'family': 'Culicidae', 'genus': 'Malaya', 'species': 'Malaya genurostris'}	Malaya genurostris
TTCATGTGTCCTGCAGTTCACATTCTG	TTCATGTGTCCTGCAGTTCACATTCTGACGCGCATTTAGCTGCGGTCTTCATCGATCCACGAGCCGAGTGATCCCCAGATC	TTCATGTGTCCTGCAGTTCACATTCTGACGCGCATTTAGCTGCGGTCTTCATCGATCCACGAGCCGAGTGAGATCGGAAGA	7321	D2	ACGCGCATTTAGCTTCCACGAGCCGAG	GCGGTCTTCATCGATGATCCCCAGATC	0.0772991		-------{-----()-----}gat-gga-ga	0.00399247	5.8S ribosomal RNA	PREDICTED: Malaya genurostris 5.8S ribosomal RNA (LOC131433328), rRNA	{'superkingdom': 'Eukaryota', 'phylum': 'Arthropoda', 'class': 'Insecta', 'order': 'Diptera', 'family': 'Culicidae', 'genus': 'Malaya', 'species': 'Malaya genurostris'}	Malaya genurostris
ACATGCATGGCTTAACCTTTGAGACAA	ACATGCATGGCTTAACCTTTGAGACAAGCGTATATTACTGGTAGGATCAACCAGAATTCGTCGACATTAGCGCACACGCAG	ACATGCATGGCTTAACCTTTGAGACAAGCGTATATTACTGGTAGGATCAACCAGAATTCGTCAACATTAGCGCACGCAGAT	41	D1	GCGTATATTACTGGTAGGATCAACCAGA	ATTCGTCGACATTAGCGCACACGCAG	0.401961	----------{-----(-------)-----}-		0.00406962	18S ribosomal RNA	Culex torrentium clone torrentium2 28S ribosomal RNA gene, partial sequence; 28S-18S ribosomal RNA intergenic spacer, complete sequence; and 18S ribosomal RNA gene, partial sequence	{'superkingdom': 'Eukaryota', 'phylum': 'Arthropoda', 'class': 'Insecta', 'order': 'Diptera', 'family': 'Culicidae', 'genus': 'Culex', 'species': 'Culex torrentium'}	Culex torrentium
ACATGCATGGCTTAACCTTTGAGACAA	ACATGCATGGCTTAACCTTTGAGACAAGCGTATATTACTGGTAGGATCAACCAGAATTCGTCGACATTAGCGCACACGCAG	ACATGCATGGCTTAACCTTTGAGACAAGCGTATATTACTGGTAGGATCAACCAGAATTCTCGTCGTGGATAGAACAACAAC	40	D1	GCGTATATTACTGGTAGGATCAACCAGA	ATTCGTCGACATTAGCGCACACGCAG	0.392157	----------{-----(-------)-----}-		0.00406962	18S ribosomal RNA	Culex torrentium clone torrentium2 28S ribosomal RNA gene, partial sequence; 28S-18S ribosomal RNA intergenic spacer, complete sequence; and 18S ribosomal RNA gene, partial sequence	{'superkingdom': 'Eukaryota', 'phylum': 'Arthropoda', 'class': 'Insecta', 'order': 'Diptera', 'family': 'Culicidae', 'genus': 'Culex', 'species': 'Culex torrentium'}	Culex torrentium
ACATGCATGGCTTAACCTTTGAGACAA	ACATGCATGGCTTAACCTTTGAGACAAGCGTATATTACTGGTAGGATCAACCAGAATTCGTCGACATTAGCGCACACGCAG	ACATGCATGGCTTAACCTTTGAGACAAGCGTATATTACTGGTAGGATCAACCAGAATTCTTCGACACACGATACGACGATG	21	D1	GCGTATATTACTGGTAGGATCAACCAGA	ATTCGTCGACATTAGCGCACACGCAG	0.205882	----------{-----(-------)-----}-		0.00406962	18S ribosomal RNA	Culex torrentium clone torrentium2 28S ribosomal RNA gene, partial sequence; 28S-18S ribosomal RNA intergenic spacer, complete sequence; and 18S ribosomal RNA gene, partial sequence	{'superkingdom': 'Eukaryota', 'phylum': 'Arthropoda', 'class': 'Insecta', 'order': 'Diptera', 'family': 'Culicidae', 'genus': 'Culex', 'species': 'Culex torrentium'}	Culex torrentium
GCATGCATGGCTTAACCTTTGAGACAA	GCATGCATGGCTTAACCTTTGAGACAAGCGTATATTACTGGTAGGATCAACCAGAATTCGTCGACATTAGCGCACACGCAG	GCATGCATGGCTTAACCTTTGAGACAAGCGTATATTACTGGTAGGATCAACCAGAATTCTCGTCGTGGATAGAACAACAAC	45	D1	GCGTATATTACTGGTAGGATCAACCAGA	ATTCGTCGACATTAGCGCACACGCAG	0.432692	----------{-----(-------)-----}-		0.00406962	18S ribosomal RNA	Culex torrentium clone torrentium2 28S ribosomal RNA gene, partial sequence; 28S-18S ribosomal RNA intergenic spacer, complete sequence; and 18S ribosomal RNA gene, partial sequence	{'superkingdom': 'Eukaryota', 'phylum': 'Arthropoda', 'class': 'Insecta', 'order': 'Diptera', 'family': 'Culicidae', 'genus': 'Culex', 'species': 'Culex torrentium'}	Culex torrentium
GCATGCATGGCTTAACCTTTGAGACAA	GCATGCATGGCTTAACCTTTGAGACAAGCGTATATTACTGGTAGGATCAACCAGAATTCGTCGACATTAGCGCACACGCAG	GCATGCATGGCTTAACCTTTGAGACAAGCGTATATTACTGGTAGGATCAACCAGAATTCGTCAACATTAGCGCACGCAGAT	41	D1	GCGTATATTACTGGTAGGATCAACCAGA	ATTCGTCGACATTAGCGCACACGCAG	0.394231	----------{-----(-------)-----}-		0.00406962	18S ribosomal RNA	Culex torrentium clone torrentium2 28S ribosomal RNA gene, partial sequence; 28S-18S ribosomal RNA intergenic spacer, complete sequence; and 18S ribosomal RNA gene, partial sequence	{'superkingdom': 'Eukaryota', 'phylum': 'Arthropoda', 'class': 'Insecta', 'order': 'Diptera', 'family': 'Culicidae', 'genus': 'Culex', 'species': 'Culex torrentium'}	Culex torrentium
GCATGCATGGCTTAACCTTTGAGACAA	GCATGCATGGCTTAACCTTTGAGACAAGCGTATATTACTGGTAGGATCAACCAGAATTCGTCGACATTAGCGCACACGCAG	GCATGCATGGCTTAACCTTTGAGACAAGCGTATATTACTGGTAGGATCAACCAGAATTCTTCGACACACGATACGACGATG	18	D1	GCGTATATTACTGGTAGGATCAACCAGA	ATTCGTCGACATTAGCGCACACGCAG	0.173077	----------{-----(-------)-----}-		0.00406962	18S ribosomal RNA	Culex torrentium clone torrentium2 28S ribosomal RNA gene, partial sequence; 28S-18S ribosomal RNA intergenic spacer, complete sequence; and 18S ribosomal RNA gene, partial sequence	{'superkingdom': 'Eukaryota', 'phylum': 'Arthropoda', 'class': 'Insecta', 'order': 'Diptera', 'family': 'Culicidae', 'genus': 'Culex', 'species': 'Culex torrentium'}	Culex torrentium
TTCATGTGTCCTGCGGTTCACATTCTG	TTCATGTGTCCTGCGGTTCACATTCTGACGCGCATTTAGCTGCGGTCTTCATCGATCCACGAGCCGAGTGATCCCCAGATC	TTCATGTGTCCTGCGGTTCACATTCTGACGCGCATTTAGCTGCGGTCTTCATCGATCCACGAGCCGAGTGAGATCGGAAGA	4	D2	ACGCGCATTTAGCTTCCACGAGCCGAG	GCGGTCTTCATCGATGATCCCCAGATC	0.4		-------{-----()-----}gat-gga-ga	0.00408611	5.8S ribosomal RNA	PREDICTED: Malaya genurostris 5.8S ribosomal RNA (LOC131433328), rRNA	{'superkingdom': 'Eukaryota', 'phylum': 'Arthropoda', 'class': 'Insecta', 'order': 'Diptera', 'family': 'Culicidae', 'genus': 'Malaya', 'species': 'Malaya genurostris'}	Malaya genurostris
TTCATGTGTCCTGCGGTTCACATTCTG	TTCATGTGTCCTGCGGTTCACATTCTGACGCGCATTTAGCTGCGGTCTTCATCGATCCACGAGCCGAGTGATCCCCAGATC	TTCATGTGTCCTGCGGTTCACATTCTGACGCGCATTTAGCTGCGGTCTTCATCGATCCACGAGCCGAGTGATCCAGATCGG	3	D2	ACGCGCATTTAGCTTCCACGAGCCGAG	GCGGTCTTCATCGATGATCCCCAGATC	0.3		-------{-----()-----}---ag-tcgg	0.00408611	5.8S ribosomal RNA	PREDICTED: Malaya genurostris 5.8S ribosomal RNA (LOC131433328), rRNA	{'superkingdom': 'Eukaryota', 'phylum': 'Arthropoda', 'class': 'Insecta', 'order': 'Diptera', 'family': 'Culicidae', 'genus': 'Malaya', 'species': 'Malaya genurostris'}	Malaya genurostris
TTCATGTGTCCTGCGGTTCACATTCTG	TTCATGTGTCCTGCGGTTCACATTCTGACGCGCATTTAGCTGCGGTCTTCATCGATCCACGAGCCGAGTGATCCCCAGATC	TTCATGTGTCCTGCGGTTCACATTCTGACGCGCATTTAGCTGCGGTCTTCATCGATCCACGAGCCGAGTGATCCCCTAGAT	3	D2	ACGCGCATTTAGCTTCCACGAGCCGAG	GCGGTCTTCATCGATGATCCCCAGATC	0.3		-------{-----()-----}-----tagat	0.00408611	5.8S ribosomal RNA	PREDICTED: Malaya genurostris 5.8S ribosomal RNA (LOC131433328), rRNA	{'superkingdom': 'Eukaryota', 'phylum': 'Arthropoda', 'class': 'Insecta', 'order': 'Diptera', 'family': 'Culicidae', 'genus': 'Malaya', 'species': 'Malaya genurostris'}	Malaya genurostris
AACCGCGGCTGCTGGCACCAGACATGC	AACCGCGGCTGCTGGCACCAGACATGCCCTCCACTTGATCCTTACCGAAGGATTTATGCTCGGTTCATTCCAATTATAAA	AACCGCGGCTGCTGGCACCAGACATGCCCTCCACTTGATCCTTGTTGAAGGATTTATGCTCAACTCATTCCAATTATAAGA	4	D3	CCTCCACTTGATCCTCCAATTATAAAA	TTACCGAAGGATTTATGCTCGGTTCAT	0.5		--{GTT--(-----------)--AAC}----	0.00420445	18S ribosomal RNA	Culex tritaeniorhynchus isolate MG_S115 small subunit ribosomal RNA, partial sequence	{'superkingdom': 'Eukaryota', 'phylum': 'Arthropoda', 'class': 'Insecta', 'order': 'Diptera', 'family': 'Culicidae', 'genus': 'Culex', 'species': 'Culex tritaeniorhynchus'}	Culex tritaeniorhynchus
AACCGCGGCTGCTGGCACCAGACATGC	AACCGCGGCTGCTGGCACCAGACATGCCCTCCACTTGATCCTTACCGAAGGATTTATGCTCGGTTCATTCCAATTATAAA	AACCGCGGCTGCTGGCACCAGACATGCACTCCACTTGATCCTTACATAAGGAATTAAGCTCGGTTCATTCAAATAATAAAA	1	D3	CCTCCACTTGATCCTCCAATTATAAAA	TTACCGAAGGATTTATGCTCGGTTCAT	0.125		--{--at-(----a---a--)-----}----	0.00420445		Culex tritaeniorhynchus isolate MG_S115 small subunit ribosomal RNA, partial sequence	{'superkingdom': 'Eukaryota', 'phylum': 'Arthropoda', 'class': 'Insecta', 'order': 'Diptera', 'family': 'Culicidae', 'genus': 'Culex', 'species': 'Culex tritaeniorhynchus'}	Culex tritaeniorhynchus
AACCGCGGCTGCTGGCACCAGACATGC	AACCGCGGCTGCTGGCACCAGACATGCCCTCCACTTGATCCTTACCGAAGGATTTATGCTCGGTTCATTCCAATTATAAA	AACCGCGGCTGCTGGCACCAGACATGCCAACCAAATGATCCTTGAAGAAGGATTTATGCTCAACTCATTCCAATAATAATA	1	D3	CCTCCACTTGATCCTCCAATTATAAAA	TTACCGAAGGATTTATGCTCGGTTCAT	0.125		--{Gaa--(-----------)--aaC}----	0.00420445		Culex tritaeniorhynchus isolate MG_S115 small subunit ribosomal RNA, partial sequence	{'superkingdom': 'Eukaryota', 'phylum': 'Arthropoda', 'class': 'Insecta', 'order': 'Diptera', 'family': 'Culicidae', 'genus': 'Culex', 'species': 'Culex tritaeniorhynchus'}	Culex tritaeniorhynchus
AACCGCGGCTGCTGGCACCAGACATGC	AACCGCGGCTGCTGGCACCAGACATGCCCTCCACTTGATCCTTACCGAAGGATTTATGCTCGGTTCATTCCAATTATAAA	AACCGCGGCTGCTGGCACCAGACATGCCCTCCAATAGATACTTGTTGAAGGAATTATGATCAACTCATTCCAATAATAAGA	1	D3	CCTCCACTTGATCCTCCAATTATAAAA	TTACCGAAGGATTTATGCTCGGTTCAT	0.125		--{GTT--(----a-----a)--AAC}----	0.00420445		Culex tritaeniorhynchus isolate MG_S115 small subunit ribosomal RNA, partial sequence	{'superkingdom': 'Eukaryota', 'phylum': 'Arthropoda', 'class': 'Insecta', 'order': 'Diptera', 'family': 'Culicidae', 'genus': 'Culex', 'species': 'Culex tritaeniorhynchus'}	Culex tritaeniorhynchus
AACCGCGGCTGCTGGCACCAGACATGC	AACCGCGGCTGCTGGCACCAGACATGCCCTCCACTTGATCCTTACCGAAGGATTTATGCTCGGTTCATTCCAATTATAAA	AACCGCGGCTGCTGGCACCAGACATGCCCTCCACTAGATCCTTGTTTAAGGATTTAAGCTCAACTCATTCCAATTATAATA	1	D3	CCTCCACTTGATCCTCCAATTATAAAA	TTACCGAAGGATTTATGCTCGGTTCAT	0.125		--{GTTt-(--------a--)--AAC}----	0.00420445	18S ribosomal RNA	Culex tritaeniorhynchus isolate MG_S115 small subunit ribosomal RNA, partial sequence	{'superkingdom': 'Eukaryota', 'phylum': 'Arthropoda', 'class': 'Insecta', 'order': 'Diptera', 'family': 'Culicidae', 'genus': 'Culex', 'species': 'Culex tritaeniorhynchus'}	Culex tritaeniorhynchus
TCAAGTGTCCTGCAGTTCACATTCTGA	TCAAGTGTCCTGCAGTTCACATTCTGACGCGCATTTAGCTGCGGTCTTCATCGATCCACGAGCCGAGTGATCCCCAGATCG	TCAAGTGTCCTGCAGTTCACATTCTGACGCGCATTTAGCTGCGGTCTTCATCGATCCACGAGCCGAGTGATCAGATCGGAA	15	D2	CGCGCATTTAGCTGCCACGAGCCGAGT	CGGTCTTCATCGATGATCCCCAGATCG	0.263158		------{-----()-----}--agatcggaa	0.00427494	5.8S ribosomal RNA	PREDICTED: Malaya genurostris 5.8S ribosomal RNA (LOC131439821), rRNA	{'superkingdom': 'Eukaryota', 'phylum': 'Arthropoda', 'class': 'Insecta', 'order': 'Diptera', 'family': 'Culicidae', 'genus': 'Malaya', 'species': 'Malaya genurostris'}	Malaya genurostris
TCAAGTGTCCTGCAGTTCACATTCTGA	TCAAGTGTCCTGCAGTTCACATTCTGACGCGCATTTAGCTGCGGTCTTCATCGATCCACGAGCCGAGTGATCCCCAGATCG	TCAAGTGTCCTGCAGTTCACATTCTGACGCGCATTTAGCTGCGGTCTTCATCGATCCACGAGCCGAGTGATCCAGATCGGA	15	D2	CGCGCATTTAGCTGCCACGAGCCGAGT	CGGTCTTCATCGATGATCCCCAGATCG	0.263158		------{-----()-----}---ag-tcgga	0.00427494	5.8S ribosomal RNA	PREDICTED: Malaya genurostris 5.8S ribosomal RNA (LOC131439821), rRNA	{'superkingdom': 'Eukaryota', 'phylum': 'Arthropoda', 'class': 'Insecta', 'order': 'Diptera', 'family': 'Culicidae', 'genus': 'Malaya', 'species': 'Malaya genurostris'}	Malaya genurostris
TCAAGTGTCCTGCAGTTCACATTCTGA	TCAAGTGTCCTGCAGTTCACATTCTGACGCGCATTTAGCTGCGGTCTTCATCGATCCACGAGCCGAGTGATCCCCAGATCG	TCAAGTGTCCTGCAGTTCACATTCTGACGCGCATTTAGCTGCGGTCTTCATCGATCCACGAGCCGAGTGATCCCCTGAGAT	14	D2	CGCGCATTTAGCTGCCACGAGCCGAGT	CGGTCTTCATCGATGATCCCCAGATCG	0.245614		------{-----()-----}-----t--gat	0.00427494	5.8S ribosomal RNA	PREDICTED: Malaya genurostris 5.8S ribosomal RNA (LOC131439821), rRNA	{'superkingdom': 'Eukaryota', 'phylum': 'Arthropoda', 'class': 'Insecta', 'order': 'Diptera', 'family': 'Culicidae', 'genus': 'Malaya', 'species': 'Malaya genurostris'}	Malaya genurostris
TCAAGTGTCCTGCAGTTCACATTCTGA	TCAAGTGTCCTGCAGTTCACATTCTGACGCGCATTTAGCTGCGGTCTTCATCGATCCACGAGCCGAGTGATCCCCAGATCG	TCAAGTGTCCTGCAGTTCACATTCTGACGCGCATTTAGCTGCGGTCTTCATCGATCCACGAGCCGAGTGATCCCAGATCGG	13	D2	CGCGCATTTAGCTGCCACGAGCCGAGT	CGGTCTTCATCGATGATCCCCAGATCG	0.22807		------{-----()-----}----agatcg-	0.00427494	5.8S ribosomal RNA	PREDICTED: Malaya genurostris 5.8S ribosomal RNA (LOC131439821), rRNA	{'superkingdom': 'Eukaryota', 'phylum': 'Arthropoda', 'class': 'Insecta', 'order': 'Diptera', 'family': 'Culicidae', 'genus': 'Malaya', 'species': 'Malaya genurostris'}	Malaya genurostris
TCATGTGTCCTGCAGTTCACAATCTGA	TCATGTGTCCTGCAGTTCACAATCTGACGCGCATTTAGCTGCGGTCTTCATCGATCCACGAGCCGAGTGATCCCCAGATCG	TCATGTGTCCTGCAGTTCACAATCTGACGCGCATTTAGCTGCGGTCTTCATCGATCCACGAGCCGAGTGATCAGATCGGAA	13	D2	CGCGCATTTAGCTGCCACGAGCCGAGT	CGGTCTTCATCGATGATCCCCAGATCG	0.317073		------{-----()-----}--agatcggaa	0.00427494	5.8S ribosomal RNA	PREDICTED: Malaya genurostris 5.8S ribosomal RNA (LOC131433328), rRNA	{'superkingdom': 'Eukaryota', 'phylum': 'Arthropoda', 'class': 'Insecta', 'order': 'Diptera', 'family': 'Culicidae', 'genus': 'Malaya', 'species': 'Malaya genurostris'}	Malaya genurostris
TCATGTGTCCTGCAGTTCACAATCTGA	TCATGTGTCCTGCAGTTCACAATCTGACGCGCATTTAGCTGCGGTCTTCATCGATCCACGAGCCGAGTGATCCCCAGATCG	TCATGTGTCCTGCAGTTCACAATCTGACGCGCATTTAGCTGCGGTCTTCATCGATCCACGAGCCGAGTGATCCAGATCGGA	10	D2	CGCGCATTTAGCTGCCACGAGCCGAGT	CGGTCTTCATCGATGATCCCCAGATCG	0.243902		------{-----()-----}---ag-tcgga	0.00427494	5.8S ribosomal RNA	PREDICTED: Malaya genurostris 5.8S ribosomal RNA (LOC131433328), rRNA	{'superkingdom': 'Eukaryota', 'phylum': 'Arthropoda', 'class': 'Insecta', 'order': 'Diptera', 'family': 'Culicidae', 'genus': 'Malaya', 'species': 'Malaya genurostris'}	Malaya genurostris
TCATGTGTCCTGCAGTTCACAATCTGA	TCATGTGTCCTGCAGTTCACAATCTGACGCGCATTTAGCTGCGGTCTTCATCGATCCACGAGCCGAGTGATCCCCAGATCG	TCATGTGTCCTGCAGTTCACAATCTGACGCGCATTTAGCTGCGGTCTTCATCGATCCACGAGCCGAGTGATCCCAGATCGG	7	D2	CGCGCATTTAGCTGCCACGAGCCGAGT	CGGTCTTCATCGATGATCCCCAGATCG	0.170732		------{-----()-----}----agatcg-	0.00427494	5.8S ribosomal RNA	PREDICTED: Malaya genurostris 5.8S ribosomal RNA (LOC131433328), rRNA	{'superkingdom': 'Eukaryota', 'phylum': 'Arthropoda', 'class': 'Insecta', 'order': 'Diptera', 'family': 'Culicidae', 'genus': 'Malaya', 'species': 'Malaya genurostris'}	Malaya genurostris
TCATGTGTCCTGCAGTTCACAATCTGA	TCATGTGTCCTGCAGTTCACAATCTGACGCGCATTTAGCTGCGGTCTTCATCGATCCACGAGCCGAGTGATCCCCAGATCG	TCATGTGTCCTGCAGTTCACAATCTGACGCGCATTTAGCTGCGGTCTTCATCGATCCACGAGCCGAGTGATCCCCTGAGAT	7	D2	CGCGCATTTAGCTGCCACGAGCCGAGT	CGGTCTTCATCGATGATCCCCAGATCG	0.170732		------{-----()-----}-----t--gat	0.00427494	5.8S ribosomal RNA	PREDICTED: Malaya genurostris 5.8S ribosomal RNA (LOC131433328), rRNA	{'superkingdom': 'Eukaryota', 'phylum': 'Arthropoda', 'class': 'Insecta', 'order': 'Diptera', 'family': 'Culicidae', 'genus': 'Malaya', 'species': 'Malaya genurostris'}	Malaya genurostris
TCATGTGTCCTGCAGTTCACAATCTGA	TCATGTGTCCTGCAGTTCACAATCTGACGCGCATTTAGCTGCGGTCTTCATCGATCCACGAGCCGAGTGATCCCCAGATCG	TCATGTGTCCTGCAGTTCACAATCTGACGCGCATTTAGCTGCGGTCTTCATCGATCCACGAGCCGAGAGAACGGAAGAGCA	4	D2	CGCGCATTTAGCTGCCACGAGCCGAGT	CGGTCTTCATCGATGATCCCCAGATCG	0.097561		------{-----()-----}a-gga---g-a	0.00427494	5.8S ribosomal RNA	PREDICTED: Malaya genurostris 5.8S ribosomal RNA (LOC131433328), rRNA	{'superkingdom': 'Eukaryota', 'phylum': 'Arthropoda', 'class': 'Insecta', 'order': 'Diptera', 'family': 'Culicidae', 'genus': 'Malaya', 'species': 'Malaya genurostris'}	Malaya genurostris
CGGTCACCTATCTAAGTACTAATCGCG	CGGTCACCTATCTAAGTACTAATCGCGCCCGATGTTGCTTAACTTCGGTGATCGGACGAGAACCGGTGTTTTCAAAGATCG	CGGTCACCTATCTAAGTACTAATCGCGCCCGATGTTGCTTAACTTCAGTGATCGGACGAGAACTGGTGTTTTCAACAGATC	2	D1	CCCGATGTTGCTTAACTTCGGTGATCGG	ACGAGAACCGGTGTTTTCAAAGATCG	0.166667	-{-----(-------------a---)-----}		0.00427651	5S ribosomal RNA	PREDICTED: Uranotaenia lowii 5S ribosomal RNA (LOC129740736), rRNA	{'superkingdom': 'Eukaryota', 'phylum': 'Arthropoda', 'class': 'Insecta', 'order': 'Diptera', 'family': 'Culicidae', 'genus': 'Uranotaenia', 'species': 'Uranotaenia lowii'}	Uranotaenia lowii
CGGTCACCTATCTAAGTACTAATCGCG	CGGTCACCTATCTAAGTACTAATCGCGCCCGATGTTGCTTAACTTCGGTGATCGGACGAGAACCGGTGTTTTCAAAGATCG	CGGTCACCTATCTAAGTACTAATCGCGCCCGATGTTGCTTAACTTCAGTGATCGGACGAGAACTGGTGTTTTCAACATGAG	2	D1	CCCGATGTTGCTTAACTTCGGTGATCGG	ACGAGAACCGGTGTTTTCAAAGATCG	0.166667	-{-----(-------------a---)-----}		0.00427651	5S ribosomal RNA	PREDICTED: Uranotaenia lowii 5S ribosomal RNA (LOC129740736), rRNA	{'superkingdom': 'Eukaryota', 'phylum': 'Arthropoda', 'class': 'Insecta', 'order': 'Diptera', 'family': 'Culicidae', 'genus': 'Uranotaenia', 'species': 'Uranotaenia lowii'}	Uranotaenia lowii
CGGTCACCTATCTAAGTACTAATCGCG	CGGTCACCTATCTAAGTACTAATCGCGCCCGATGTTGCTTAACTTCGGTGATCGGACGAGAACCGGTGTTTTCAAAGATCG	CGGTCACCTATCTAAGTACTAATCGCGCCCGATGTTGCTTAACTTCAGTGATCGGACGAGAACTGGTGTTTTCAGATCGGA	2	D1	CCCGATGTTGCTTAACTTCGGTGATCGG	ACGAGAACCGGTGTTTTCAAAGATCG	0.166667	-{-----(-------------a---)-----}		0.00427651	5S ribosomal RNA	PREDICTED: Uranotaenia lowii 5S ribosomal RNA (LOC129740736), rRNA	{'superkingdom': 'Eukaryota', 'phylum': 'Arthropoda', 'class': 'Insecta', 'order': 'Diptera', 'family': 'Culicidae', 'genus': 'Uranotaenia', 'species': 'Uranotaenia lowii'}	Uranotaenia lowii
CGGTCACCTATCTAAGTACTAATCGCG	CGGTCACCTATCTAAGTACTAATCGCGCCCGATGTTGCTTAACTTCGGTGATCGGACGAGAACCGGTGTTTTCAAAGATCG	CGGTCACCTATCTAAGTACTAATCGCGCCCGATGTTGCTTAACTTCGGTGATCGGACGAGAACCGGTGTTTTCAACAGATC	2	D1	CCCGATGTTGCTTAACTTCGGTGATCGG	ACGAGAACCGGTGTTTTCAAAGATCG	0.166667	-{-----(-----------------)-----}		0.00427651	5S ribosomal RNA	PREDICTED: Uranotaenia lowii 5S ribosomal RNA (LOC129740736), rRNA	{'superkingdom': 'Eukaryota', 'phylum': 'Arthropoda', 'class': 'Insecta', 'order': 'Diptera', 'family': 'Culicidae', 'genus': 'Uranotaenia', 'species': 'Uranotaenia lowii'}	Uranotaenia lowii
CGGTCACCTATCTAAGTACTAATCGCG	CGGTCACCTATCTAAGTACTAATCGCGCCCGATGTTGCTTAACTTCGGTGATCGGACGAGAACCGGTGTTTTCAAAGATCG	CGGTCACCTATCTAAGTACTAATCGCGCCCGATGTTGCTTAACTTCAGTGATCGGACGAGAACTGGTGTTTTCAAGATCGG	1	D1	CCCGATGTTGCTTAACTTCGGTGATCGG	ACGAGAACCGGTGTTTTCAAAGATCG	0.0833333	-{-----(-------------a---)-----}		0.00427651	5S ribosomal RNA	PREDICTED: Uranotaenia lowii 5S ribosomal RNA (LOC129740736), rRNA	{'superkingdom': 'Eukaryota', 'phylum': 'Arthropoda', 'class': 'Insecta', 'order': 'Diptera', 'family': 'Culicidae', 'genus': 'Uranotaenia', 'species': 'Uranotaenia lowii'}	Uranotaenia lowii
CGGTCACCTATCTAAGTACTAATCGCG	CGGTCACCTATCTAAGTACTAATCGCGCCCGATGTTGCTTAACTTCGGTGATCGGACGAGAACCGGTGTTTTCAAAGATCG	CGGTCACCTATCTAAGTACTAATCGCGCCCGATGTTGCTTAACTTCGGTGATCGGACGAGAACCGGTGTTTTCAACATGGA	1	D1	CCCGATGTTGCTTAACTTCGGTGATCGG	ACGAGAACCGGTGTTTTCAAAGATCG	0.0833333	-{-----(-----------------)-----}		0.00427651	5S ribosomal RNA	PREDICTED: Uranotaenia lowii 5S ribosomal RNA (LOC129740736), rRNA	{'superkingdom': 'Eukaryota', 'phylum': 'Arthropoda', 'class': 'Insecta', 'order': 'Diptera', 'family': 'Culicidae', 'genus': 'Uranotaenia', 'species': 'Uranotaenia lowii'}	Uranotaenia lowii
CGGTCACCTATCTAAGTACTAATCGCG	CGGTCACCTATCTAAGTACTAATCGCGCCCGATGTTGCTTAACTTCGGTGATCGGACGAGAACCGGTGTTTTCAAAGATCG	CGGTCACCTATCTAAGTACTAATCGCGCCCGATGTTGCTTAACTTCGGTGATCGGACGAGAACCGGTGTTTTCAAGATCGG	1	D1	CCCGATGTTGCTTAACTTCGGTGATCGG	ACGAGAACCGGTGTTTTCAAAGATCG	0.0833333	-{-----(-----------------)-----}		0.00427651	5S ribosomal RNA	PREDICTED: Uranotaenia lowii 5S ribosomal RNA (LOC129740736), rRNA	{'superkingdom': 'Eukaryota', 'phylum': 'Arthropoda', 'class': 'Insecta', 'order': 'Diptera', 'family': 'Culicidae', 'genus': 'Uranotaenia', 'species': 'Uranotaenia lowii'}	Uranotaenia lowii
CGGTCACCTATCTAAGTACTAATCGCG	CGGTCACCTATCTAAGTACTAATCGCGCCCGATGTTGCTTAACTTCGGTGATCGGACGAGAACCGGTGTTTTCAAAGATCG	CGGTCACCTATCTAAGTACTAATCGCGCCCGATGTTGCTTAACTTCGGTGATCGGACGAGAACCGGTGTTTTTATTTGAAA	1	D1	CCCGATGTTGCTTAACTTCGGTGATCGG	ACGAGAACCGGTGTTTTCAAAGATCG	0.0833333	-{-----(-----------------)-----}		0.00427651	5S ribosomal RNA	PREDICTED: Uranotaenia lowii 5S ribosomal RNA (LOC129740736), rRNA	{'superkingdom': 'Eukaryota', 'phylum': 'Arthropoda', 'class': 'Insecta', 'order': 'Diptera', 'family': 'Culicidae', 'genus': 'Uranotaenia', 'species': 'Uranotaenia lowii'}	Uranotaenia lowii
TCATGTGTCCTGCAGTTCACATTCTGA	TCATGTGTCCTGCAGTTCACATTCTGACGCGCATTTAGCTGCGGTCTTCATCGATCCACGAGCCGAGTGATCCCCAGATCG	TCATGTGTCCTGCAGTTCACATTCTGACGCGCATTTAGCTGCGGTCTTCATCGATCCACGAGCCGAGTGATCCAGATCGGA	2412	D2	CGCGCATTTAGCTGCCACGAGCCGAGT	CGGTCTTCATCGATGATCCCCAGATCG	0.264851		------{-----()-----}---ag-tcgga	0.00427651	5.8S ribosomal RNA	PREDICTED: Malaya genurostris 5.8S ribosomal RNA (LOC131433328), rRNA	{'superkingdom': 'Eukaryota', 'phylum': 'Arthropoda', 'class': 'Insecta', 'order': 'Diptera', 'family': 'Culicidae', 'genus': 'Malaya', 'species': 'Malaya genurostris'}	Malaya genurostris
TCATGTGTCCTGCAGTTCACATTCTGA	TCATGTGTCCTGCAGTTCACATTCTGACGCGCATTTAGCTGCGGTCTTCATCGATCCACGAGCCGAGTGATCCCCAGATCG	TCATGTGTCCTGCAGTTCACATTCTGACGCGCATTTAGCTGCGGTCTTCATCGATCCACGAGCCGAGTGATCCCAGATCGG	1754	D2	CGCGCATTTAGCTGCCACGAGCCGAGT	CGGTCTTCATCGATGATCCCCAGATCG	0.192599		------{-----()-----}----agatcg-	0.00427651	5.8S ribosomal RNA	PREDICTED: Malaya genurostris 5.8S ribosomal RNA (LOC131433328), rRNA	{'superkingdom': 'Eukaryota', 'phylum': 'Arthropoda', 'class': 'Insecta', 'order': 'Diptera', 'family': 'Culicidae', 'genus': 'Malaya', 'species': 'Malaya genurostris'}	Malaya genurostris
TCATGTGTCCTGCAGTTCACATTCTGA	TCATGTGTCCTGCAGTTCACATTCTGACGCGCATTTAGCTGCGGTCTTCATCGATCCACGAGCCGAGTGATCCCCAGATCG	TCATGTGTCCTGCAGTTCACATTCTGACGCGCATTTAGCTGCGGTCTTCATCGATCCACGAGCCGAGTGATCAGATCGGAA	1717	D2	CGCGCATTTAGCTGCCACGAGCCGAGT	CGGTCTTCATCGATGATCCCCAGATCG	0.188536		------{-----()-----}--agatcggaa	0.00427651	5.8S ribosomal RNA	PREDICTED: Malaya genurostris 5.8S ribosomal RNA (LOC131433328), rRNA	{'superkingdom': 'Eukaryota', 'phylum': 'Arthropoda', 'class': 'Insecta', 'order': 'Diptera', 'family': 'Culicidae', 'genus': 'Malaya', 'species': 'Malaya genurostris'}	Malaya genurostris
TCATGTGTCCTGCAGTTCACATTCTGA	TCATGTGTCCTGCAGTTCACATTCTGACGCGCATTTAGCTGCGGTCTTCATCGATCCACGAGCCGAGTGATCCCCAGATCG	TCATGTGTCCTGCAGTTCACATTCTGACGCGCATTTAGCTGCGGTCTTCATCGATCCACGAGCCGAGTGATCCCCTGAGAT	1503	D2	CGCGCATTTAGCTGCCACGAGCCGAGT	CGGTCTTCATCGATGATCCCCAGATCG	0.165038		------{-----()-----}-----t--gat	0.00427651	5.8S ribosomal RNA	PREDICTED: Malaya genurostris 5.8S ribosomal RNA (LOC131433328), rRNA	{'superkingdom': 'Eukaryota', 'phylum': 'Arthropoda', 'class': 'Insecta', 'order': 'Diptera', 'family': 'Culicidae', 'genus': 'Malaya', 'species': 'Malaya genurostris'}	Malaya genurostris
TCATGTGTCCTGCAGTTCACATTCTGA	TCATGTGTCCTGCAGTTCACATTCTGACGCGCATTTAGCTGCGGTCTTCATCGATCCACGAGCCGAGTGATCCCCAGATCG	TCATGTGTCCTGCAGTTCACATTCTGACGCGCATTTAGCTGCGGTCTTCATCGATCCACGAGCCGAGTGATCCCCTGCCTA	888	D2	CGCGCATTTAGCTGCCACGAGCCGAGT	CGGTCTTCATCGATGATCCCCAGATCG	0.0975074		------{-----()-----}-----t-ccta	0.00427651	5.8S ribosomal RNA	PREDICTED: Malaya genurostris 5.8S ribosomal RNA (LOC131433328), rRNA	{'superkingdom': 'Eukaryota', 'phylum': 'Arthropoda', 'class': 'Insecta', 'order': 'Diptera', 'family': 'Culicidae', 'genus': 'Malaya', 'species': 'Malaya genurostris'}	Malaya genurostris
TCATGTGTCCTGCAGTTCACATTCTGA	TCATGTGTCCTGCAGTTCACATTCTGACGCGCATTTAGCTGCGGTCTTCATCGATCCACGAGCCGAGTGATCCCCAGATCG	TCATGTGTCCTGCAGTTCACATTCTGACGCGCATTTAGCTGCGGTCTTCATCGATCCACGAGCCGAGTGATCCCCTAGATC	833	D2	CGCGCATTTAGCTGCCACGAGCCGAGT	CGGTCTTCATCGATGATCCCCAGATCG	0.0914681		------{-----()-----}-----tagatc	0.00427651	5.8S ribosomal RNA	PREDICTED: Malaya genurostris 5.8S ribosomal RNA (LOC131433328), rRNA	{'superkingdom': 'Eukaryota', 'phylum': 'Arthropoda', 'class': 'Insecta', 'order': 'Diptera', 'family': 'Culicidae', 'genus': 'Malaya', 'species': 'Malaya genurostris'}	Malaya genurostris
TTACCTCGGCTGCTGGCACCAGACTTG	TTACCTCGGCTGCTGGCACCAGACTTGCCCTCCACTTGATCCTTACCGAAGGATTTATGCTCGGTTCATTCCAATTATAA	TTACCTCGGCTGCTGGCACCAGACTTGCCCTCCACTTGATCCTTGTTGAAGGATTTATGCTCAACTCATTCCAATTATAAG	2	D3	CCCTCCACTTGATCTTCCAATTATAAA	CTTACCGAAGGATTTATGCTCGGTTCA	0.285714		---{GTT--(-----------)--AAC}---	0.00431531	18S ribosomal RNA	Culex tritaeniorhynchus isolate MG_S115 small subunit ribosomal RNA, partial sequence	{'superkingdom': 'Eukaryota', 'phylum': 'Arthropoda', 'class': 'Insecta', 'order': 'Diptera', 'family': 'Culicidae', 'genus': 'Culex', 'species': 'Culex tritaeniorhynchus'}	Culex tritaeniorhynchus
TTACCTCGGCTGCTGGCACCAGACTTG	TTACCTCGGCTGCTGGCACCAGACTTGCCCTCCACTTGATCCTTACCGAAGGATTTATGCTCGGTTCATTCCAATTATAA	TTACCTCGGCTGCTGGCACCAGACTTGCAATCCACTAGATCCTTCTTGAAGGATTTATGCTCAACACATTCCAAATATAAT	1	D3	CCCTCCACTTGATCTTCCAATTATAAA	CTTACCGAAGGATTTATGCTCGGTTCA	0.142857		---{cTT--(-----------)--AAc}a--	0.00431531		Culex tritaeniorhynchus isolate MG_S115 small subunit ribosomal RNA, partial sequence	{'superkingdom': 'Eukaryota', 'phylum': 'Arthropoda', 'class': 'Insecta', 'order': 'Diptera', 'family': 'Culicidae', 'genus': 'Culex', 'species': 'Culex tritaeniorhynchus'}	Culex tritaeniorhynchus
TTACCTCGGCTGCTGGCACCAGACTTG	TTACCTCGGCTGCTGGCACCAGACTTGCCCTCCACTTGATCCTTACCGAAGGATTTATGCTCGGTTCATTCCAATTATAA	TTACCTCGGCTGCTGGCACCAGACTTGCCCTACACTAGATCCTAGATGAAGGAAATATGATCAACTCATTCCAATTATAAG	1	D3	CCCTCCACTTGATCTTCCAATTATAAA	CTTACCGAAGGATTTATGCTCGGTTCA	0.142857		--a{GaT--(----aa----a)--AaC}---	0.00431531		Culex tritaeniorhynchus isolate MG_S115 small subunit ribosomal RNA, partial sequence	{'superkingdom': 'Eukaryota', 'phylum': 'Arthropoda', 'class': 'Insecta', 'order': 'Diptera', 'family': 'Culicidae', 'genus': 'Culex', 'species': 'Culex tritaeniorhynchus'}	Culex tritaeniorhynchus
TTACCTCGGCTGCTGGCACCAGACTTG	TTACCTCGGCTGCTGGCACCAGACTTGCCCTCCACTTGATCCTTACCGAAGGATTTATGCTCGGTTCATTCCAATTATAA	TTACCTCGGCTGCTGGCACCAGACTTGCCCTCCACTTGAACCATACCGAATGATTTATCCTCGGTTCATACCAAAAATAAA	1	D3	CCCTCCACTTGATCTTCCAATTATAAA	CTTACCGAAGGATTTATGCTCGGTTCA	0.142857		-a-{-----(-t-------c-)-----}---	0.00431531		Culex tritaeniorhynchus isolate MG_S115 small subunit ribosomal RNA, partial sequence	{'superkingdom': 'Eukaryota', 'phylum': 'Arthropoda', 'class': 'Insecta', 'order': 'Diptera', 'family': 'Culicidae', 'genus': 'Culex', 'species': 'Culex tritaeniorhynchus'}	Culex tritaeniorhynchus
TTACCTCGGCTGCTGGCACCAGACTTG	TTACCTCGGCTGCTGGCACCAGACTTGCCCTCCACTTGATCCTTACCGAAGGATTTATGCTCGGTTCATTCCAATTATAA	TTACCTCGGCTGCTGGCACCAGACTTGCCCTCCACTTGATCCATGTTGAATAATTTATGCTCAAAACATTAAAATTATAAG	1	D3	CCCTCCACTTGATCTTCCAATTATAAA	CTTACCGAAGGATTTATGCTCGGTTCA	0.142857		-a-{gTT--(-ta--------)--AAa}a--	0.00431531		Culex tritaeniorhynchus isolate MG_S115 small subunit ribosomal RNA, partial sequence	{'superkingdom': 'Eukaryota', 'phylum': 'Arthropoda', 'class': 'Insecta', 'order': 'Diptera', 'family': 'Culicidae', 'genus': 'Culex', 'species': 'Culex tritaeniorhynchus'}	Culex tritaeniorhynchus
TTACCTCGGCTGCTGGCACCAGACTTG	TTACCTCGGCTGCTGGCACCAGACTTGCCCTCCACTTGATCCTTACCGAAGGATTTATGCTCGGTTCATTCCAATTATAA	TTACCTCGGCTGCTGGCACCAGACTTGCCCTCCACTTGATCCTTACCGAAGGATTTATGCACGGATCATTCCAATTAAAAA	1	D3	CCCTCCACTTGATCTTCCAATTATAAA	CTTACCGAAGGATTTATGCTCGGTTCA	0.142857		---{-----(-----------)a---a}---	0.00431531		Culex tritaeniorhynchus isolate MG_S115 small subunit ribosomal RNA, partial sequence	{'superkingdom': 'Eukaryota', 'phylum': 'Arthropoda', 'class': 'Insecta', 'order': 'Diptera', 'family': 'Culicidae', 'genus': 'Culex', 'species': 'Culex tritaeniorhynchus'}	Culex tritaeniorhynchus
CGGTCACCCATCTAAGTACAAATCGCG	CGGTCACCCATCTAAGTACAAATCGCGCCCGATGTTGCTTAACTTCGGTGATCGGACGAGAACCGGTGTTTTCAACAGATC	CGGTCACCCATCTAAGTACAAATCGCGCCCGATGTTGCTTAACTTCGGTGATCGGACGAGAACCGGTGTTTTCAAGATCGG	2	D1	CCCGATGTTGCTTAACTTCGGTGATCGG	ACGAGAACCGGTGTTTTCAACAGATC	0.2	-{-----(-----------------)-----}		0.00442935	5S ribosomal RNA	PREDICTED: Uranotaenia lowii 5S ribosomal RNA (LOC129740736), rRNA	{'superkingdom': 'Eukaryota', 'phylum': 'Arthropoda', 'class': 'Insecta', 'order': 'Diptera', 'family': 'Culicidae', 'genus': 'Uranotaenia', 'species': 'Uranotaenia lowii'}	Uranotaenia lowii
CGGTCACCCATCTAAGTACAAATCGCG	CGGTCACCCATCTAAGTACAAATCGCGCCCGATGTTGCTTAACTTCGGTGATCGGACGAGAACCGGTGTTTTCAACAGATC	CGGTCACCCATCTAAGTACAAATCGCGCCCGATGTTACAAAAATTCGGTGATCGGACTAGAACCGGTGTTTTCAACATGGT	1	D1	CCCGATGTTGCTTAACTTCGGTGATCGG	ACGAGAACCGGTGTTTTCAACAGATC	0.1	-{-----(---a-aa--a-------)-----}		0.00442935	5S ribosomal RNA	PREDICTED: Uranotaenia lowii 5S ribosomal RNA (LOC129740736), rRNA	{'superkingdom': 'Eukaryota', 'phylum': 'Arthropoda', 'class': 'Insecta', 'order': 'Diptera', 'family': 'Culicidae', 'genus': 'Uranotaenia', 'species': 'Uranotaenia lowii'}	Uranotaenia lowii
CGGTCACCCATCTAAGTACAAATCGCG	CGGTCACCCATCTAAGTACAAATCGCGCCCGATGTTGCTTAACTTCGGTGATCGGACGAGAACCGGTGTTTTCAACAGATC	CGGTCACCCATCTAAGTACAAATCGCGCCCGATGTTGCTTAACTTCAGTGATCGGACGAGAAATGGTGTTTTCAGATCGGA	1	D1	CCCGATGTTGCTTAACTTCGGTGATCGG	ACGAGAACCGGTGTTTTCAACAGATC	0.1	-{-----(-------------a---)-----}		0.00442935	5S ribosomal RNA	PREDICTED: Uranotaenia lowii 5S ribosomal RNA (LOC129740736), rRNA	{'superkingdom': 'Eukaryota', 'phylum': 'Arthropoda', 'class': 'Insecta', 'order': 'Diptera', 'family': 'Culicidae', 'genus': 'Uranotaenia', 'species': 'Uranotaenia lowii'}	Uranotaenia lowii
CGGTCACCCATCTAAGTACAAATCGCG	CGGTCACCCATCTAAGTACAAATCGCGCCCGATGTTGCTTAACTTCGGTGATCGGACGAGAACCGGTGTTTTCAACAGATC	CGGTCACCCATCTAAGTACAAATCGCGCCCGATGTTGCTTAACTTCAGTGATCGGACGAGAACTGGTGTTATCAAGATCGG	1	D1	CCCGATGTTGCTTAACTTCGGTGATCGG	ACGAGAACCGGTGTTTTCAACAGATC	0.1	-{-----(-------------a---)-----}		0.00442935	5S ribosomal RNA	PREDICTED: Uranotaenia lowii 5S ribosomal RNA (LOC129740736), rRNA	{'superkingdom': 'Eukaryota', 'phylum': 'Arthropoda', 'class': 'Insecta', 'order': 'Diptera', 'family': 'Culicidae', 'genus': 'Uranotaenia', 'species': 'Uranotaenia lowii'}	Uranotaenia lowii
CGGTCACCCATCTAAGTACAAATCGCG	CGGTCACCCATCTAAGTACAAATCGCGCCCGATGTTGCTTAACTTCGGTGATCGGACGAGAACCGGTGTTTTCAACAGATC	CGGTCACCCATCTAAGTACAAATCGCGCCCGATGTTGCTTAACTTCAGTGATCGGACGAGAACTGGTGTTTTAGATCGGAA	1	D1	CCCGATGTTGCTTAACTTCGGTGATCGG	ACGAGAACCGGTGTTTTCAACAGATC	0.1	-{-----(-------------a---)-----}		0.00442935	5S ribosomal RNA	PREDICTED: Uranotaenia lowii 5S ribosomal RNA (LOC129740736), rRNA	{'superkingdom': 'Eukaryota', 'phylum': 'Arthropoda', 'class': 'Insecta', 'order': 'Diptera', 'family': 'Culicidae', 'genus': 'Uranotaenia', 'species': 'Uranotaenia lowii'}	Uranotaenia lowii
CGGTCACCCATCTAAGTACAAATCGCG	CGGTCACCCATCTAAGTACAAATCGCGCCCGATGTTGCTTAACTTCGGTGATCGGACGAGAACCGGTGTTTTCAACAGATC	CGGTCACCCATCTAAGTACAAATCGCGCCCGATGTTGCTTAACTTCAGTGATCGGACGAGAACTGGTGTTTTCAAAGAAAG	1	D1	CCCGATGTTGCTTAACTTCGGTGATCGG	ACGAGAACCGGTGTTTTCAACAGATC	0.1	-{-----(-------------a---)-----}		0.00442935	5S ribosomal RNA	PREDICTED: Uranotaenia lowii 5S ribosomal RNA (LOC129740736), rRNA	{'superkingdom': 'Eukaryota', 'phylum': 'Arthropoda', 'class': 'Insecta', 'order': 'Diptera', 'family': 'Culicidae', 'genus': 'Uranotaenia', 'species': 'Uranotaenia lowii'}	Uranotaenia lowii
CGGTCACCCATCTAAGTACAAATCGCG	CGGTCACCCATCTAAGTACAAATCGCGCCCGATGTTGCTTAACTTCGGTGATCGGACGAGAACCGGTGTTTTCAACAGATC	CGGTCACCCATCTAAGTACAAATCGCGCCCGATGTTGCTTAACTTCAGTGATCGGACGAGAACTGGTGTTTTCAATATCGG	1	D1	CCCGATGTTGCTTAACTTCGGTGATCGG	ACGAGAACCGGTGTTTTCAACAGATC	0.1	-{-----(-------------a---)-----}		0.00442935	5S ribosomal RNA	PREDICTED: Uranotaenia lowii 5S ribosomal RNA (LOC129740736), rRNA	{'superkingdom': 'Eukaryota', 'phylum': 'Arthropoda', 'class': 'Insecta', 'order': 'Diptera', 'family': 'Culicidae', 'genus': 'Uranotaenia', 'species': 'Uranotaenia lowii'}	Uranotaenia lowii
CGGTCACCCATCTAAGTACAAATCGCG	CGGTCACCCATCTAAGTACAAATCGCGCCCGATGTTGCTTAACTTCGGTGATCGGACGAGAACCGGTGTTTTCAACAGATC	CGGTCACCCATCTAAGTACAAATCGCGCCCGATGTTGCTTAACTTCGGTGATCGGACGAGAACCGCTGTTTTCAGAACGGA	1	D1	CCCGATGTTGCTTAACTTCGGTGATCGG	ACGAGAACCGGTGTTTTCAACAGATC	0.1	-{-----(-----------------)-----}		0.00442935	5S ribosomal RNA	PREDICTED: Uranotaenia lowii 5S ribosomal RNA (LOC129740736), rRNA	{'superkingdom': 'Eukaryota', 'phylum': 'Arthropoda', 'class': 'Insecta', 'order': 'Diptera', 'family': 'Culicidae', 'genus': 'Uranotaenia', 'species': 'Uranotaenia lowii'}	Uranotaenia lowii
CGGTCACCCATCTAAGTACAAATCGCG	CGGTCACCCATCTAAGTACAAATCGCGCCCGATGTTGCTTAACTTCGGTGATCGGACGAGAACCGGTGTTTTCAACAGATC	CGGTCACCCATCTAAGTACAAATCGCGCCCGATGTTGCTTAACTTCGGTGATCGGACGAGAACCGGTGTTTTCAACAAGAT	1	D1	CCCGATGTTGCTTAACTTCGGTGATCGG	ACGAGAACCGGTGTTTTCAACAGATC	0.1	-{-----(-----------------)-----}		0.00442935	5S ribosomal RNA	PREDICTED: Uranotaenia lowii 5S ribosomal RNA (LOC129740736), rRNA	{'superkingdom': 'Eukaryota', 'phylum': 'Arthropoda', 'class': 'Insecta', 'order': 'Diptera', 'family': 'Culicidae', 'genus': 'Uranotaenia', 'species': 'Uranotaenia lowii'}	Uranotaenia lowii
GCATGTGTCCTGCAGTTCACATTCTGA	GCATGTGTCCTGCAGTTCACATTCTGACGCGCATTTAGCTGCGGTCTTCATCGATCCACGAGCCGAGTGATCCCCAGATCG	GCATGTGTCCTGCAGTTCACATTCTGACGCGCATTTAGCTGCGGTCTTCATCGATCCACGAGCCGAGTGATCCAGATCGGA	43	D2	CGCGCATTTAGCTGCCACGAGCCGAGT	CGGTCTTCATCGATGATCCCCAGATCG	0.240223		------{-----()-----}---ag-tcgga	0.00443174	5.8S ribosomal RNA	Aedes flavopictus clone 12_3 18S ribosomal RNA gene, partial sequence; internal transcribed spacer 1, 5.8S ribosomal RNA gene and internal transcribed spacer 2, complete sequence; and 28S ribosomal RNA gene, partial sequence	{'superkingdom': 'Eukaryota', 'phylum': 'Arthropoda', 'class': 'Insecta', 'order': 'Diptera', 'family': 'Culicidae', 'genus': 'Aedes', 'species': 'Aedes flavopictus'}	Aedes flavopictus
GCATGTGTCCTGCAGTTCACATTCTGA	GCATGTGTCCTGCAGTTCACATTCTGACGCGCATTTAGCTGCGGTCTTCATCGATCCACGAGCCGAGTGATCCCCAGATCG	GCATGTGTCCTGCAGTTCACATTCTGACGCGCATTTAGCTGCGGTCTTCATCGATCCACGAGCCGAGTGATCCCAGATCGG	41	D2	CGCGCATTTAGCTGCCACGAGCCGAGT	CGGTCTTCATCGATGATCCCCAGATCG	0.22905		------{-----()-----}----agatcg-	0.00443174	5.8S ribosomal RNA	Aedes flavopictus clone 12_3 18S ribosomal RNA gene, partial sequence; internal transcribed spacer 1, 5.8S ribosomal RNA gene and internal transcribed spacer 2, complete sequence; and 28S ribosomal RNA gene, partial sequence	{'superkingdom': 'Eukaryota', 'phylum': 'Arthropoda', 'class': 'Insecta', 'order': 'Diptera', 'family': 'Culicidae', 'genus': 'Aedes', 'species': 'Aedes flavopictus'}	Aedes flavopictus
GCATGTGTCCTGCAGTTCACATTCTGA	GCATGTGTCCTGCAGTTCACATTCTGACGCGCATTTAGCTGCGGTCTTCATCGATCCACGAGCCGAGTGATCCCCAGATCG	GCATGTGTCCTGCAGTTCACATTCTGACGCGCATTTAGCTGCGGTCTTCATCGATCCACGAGCCGAGTGATCAGATCGGAA	32	D2	CGCGCATTTAGCTGCCACGAGCCGAGT	CGGTCTTCATCGATGATCCCCAGATCG	0.178771		------{-----()-----}--agatcggaa	0.00443174	5.8S ribosomal RNA	Aedes flavopictus clone 12_3 18S ribosomal RNA gene, partial sequence; internal transcribed spacer 1, 5.8S ribosomal RNA gene and internal transcribed spacer 2, complete sequence; and 28S ribosomal RNA gene, partial sequence	{'superkingdom': 'Eukaryota', 'phylum': 'Arthropoda', 'class': 'Insecta', 'order': 'Diptera', 'family': 'Culicidae', 'genus': 'Aedes', 'species': 'Aedes flavopictus'}	Aedes flavopictus
GCATGTGTCCTGCAGTTCACATTCTGA	GCATGTGTCCTGCAGTTCACATTCTGACGCGCATTTAGCTGCGGTCTTCATCGATCCACGAGCCGAGTGATCCCCAGATCG	GCATGTGTCCTGCAGTTCACATTCTGACGCGCATTTAGCTGCGGTCTTCATCGATCCACGAGCCGAGTGATCCCCTGCCTA	23	D2	CGCGCATTTAGCTGCCACGAGCCGAGT	CGGTCTTCATCGATGATCCCCAGATCG	0.128492		------{-----()-----}-----t-ccta	0.00443174	5.8S ribosomal RNA	Aedes flavopictus clone 12_3 18S ribosomal RNA gene, partial sequence; internal transcribed spacer 1, 5.8S ribosomal RNA gene and internal transcribed spacer 2, complete sequence; and 28S ribosomal RNA gene, partial sequence	{'superkingdom': 'Eukaryota', 'phylum': 'Arthropoda', 'class': 'Insecta', 'order': 'Diptera', 'family': 'Culicidae', 'genus': 'Aedes', 'species': 'Aedes flavopictus'}	Aedes flavopictus
GCATGTGTCCTGCAGTTCACATTCTGA	GCATGTGTCCTGCAGTTCACATTCTGACGCGCATTTAGCTGCGGTCTTCATCGATCCACGAGCCGAGTGATCCCCAGATCG	GCATGTGTCCTGCAGTTCACATTCTGACGCGCATTTAGCTGCGGTCTTCATCGATCCACGAGCCGAGTGATCCCCTAGATC	20	D2	CGCGCATTTAGCTGCCACGAGCCGAGT	CGGTCTTCATCGATGATCCCCAGATCG	0.111732		------{-----()-----}-----tagatc	0.00443174	5.8S ribosomal RNA	Aedes flavopictus clone 12_3 18S ribosomal RNA gene, partial sequence; internal transcribed spacer 1, 5.8S ribosomal RNA gene and internal transcribed spacer 2, complete sequence; and 28S ribosomal RNA gene, partial sequence	{'superkingdom': 'Eukaryota', 'phylum': 'Arthropoda', 'class': 'Insecta', 'order': 'Diptera', 'family': 'Culicidae', 'genus': 'Aedes', 'species': 'Aedes flavopictus'}	Aedes flavopictus
GCATGTGTCCTGCAGTTCACATTCTGA	GCATGTGTCCTGCAGTTCACATTCTGACGCGCATTTAGCTGCGGTCTTCATCGATCCACGAGCCGAGTGATCCCCAGATCG	GCATGTGTCCTGCAGTTCACATTCTGACGCGCATTTAGCTGCGGTCTTCATCGATCCACGAGCCGAGTGATCCCCTGAGAT	20	D2	CGCGCATTTAGCTGCCACGAGCCGAGT	CGGTCTTCATCGATGATCCCCAGATCG	0.111732		------{-----()-----}-----t--gat	0.00443174	5.8S ribosomal RNA	Aedes flavopictus clone 12_3 18S ribosomal RNA gene, partial sequence; internal transcribed spacer 1, 5.8S ribosomal RNA gene and internal transcribed spacer 2, complete sequence; and 28S ribosomal RNA gene, partial sequence	{'superkingdom': 'Eukaryota', 'phylum': 'Arthropoda', 'class': 'Insecta', 'order': 'Diptera', 'family': 'Culicidae', 'genus': 'Aedes', 'species': 'Aedes flavopictus'}	Aedes flavopictus
AACATTTGTTGTCTTCCTATGGAAGAG	AACATTTGTTGTCTTCCTATGGAAGAGCTATCAGATGTTAAGCTGATAAGAACAGATACTACACTTTGATCTTAGCCTTT	AACATTTGTTGTCTTCCTATGGAAGAGCTATCAGATGTTAAGCTGATAAGAACAGATACTACACTTTGATCTTAGAGATCG	3	D1	CTATCAGATGTTAAGCTGATAAGAACAG	ATACTACACTTTGATCTTAGCCTTTA	0.428571	-{------(--------)------}-------		0.004496	U2 spliceosomal RNA	Anopheles arabiensis genome assembly, chromosome: 2	{'superkingdom': 'Eukaryota', 'phylum': 'Arthropoda', 'class': 'Insecta', 'order': 'Diptera', 'family': 'Culicidae', 'genus': 'Anopheles', 'species': 'Anopheles arabiensis'}	Anopheles arabiensis
AACATTTGTTGTCTTCCTATGGAAGAG	AACATTTGTTGTCTTCCTATGGAAGAGCTATCAGATGTTAAGCTGATAAGAACAGATACTACACTTTGATCTTAGCCTTT	AACATTTGTTGTCTTCCTATGGAAGAGCTATCAGATGTTAAGCTGATAAGAACAGATAATACACATTGATATAAGCGTTTA	1	D1	CTATCAGATGTTAAGCTGATAAGAACAG	ATACTACACTTTGATCTTAGCCTTTA	0.142857	-{------(--------)------}-------		0.004496	U2 spliceosomal RNA	Anopheles arabiensis genome assembly, chromosome: 2	{'superkingdom': 'Eukaryota', 'phylum': 'Arthropoda', 'class': 'Insecta', 'order': 'Diptera', 'family': 'Culicidae', 'genus': 'Anopheles', 'species': 'Anopheles arabiensis'}	Anopheles arabiensis
AACATTTGTTGTCTTCCTATGGAAGAG	AACATTTGTTGTCTTCCTATGGAAGAGCTATCAGATGTTAAGCTGATAAGAACAGATACTACACTTTGATCTTAGCCTTT	AACATTTGTTGTCTTCCTATGGAAGAGCTATCAGATGTTAAGCTGATAAGAACAGATACAACACTTTTATCTTATAGATCG	1	D1	CTATCAGATGTTAAGCTGATAAGAACAG	ATACTACACTTTGATCTTAGCCTTTA	0.142857	-{------(--------)------}-------		0.004496	U2 spliceosomal RNA	Anopheles arabiensis genome assembly, chromosome: 2	{'superkingdom': 'Eukaryota', 'phylum': 'Arthropoda', 'class': 'Insecta', 'order': 'Diptera', 'family': 'Culicidae', 'genus': 'Anopheles', 'species': 'Anopheles arabiensis'}	Anopheles arabiensis
AACATTTGTTGTCTTCCTATGGAAGAG	AACATTTGTTGTCTTCCTATGGAAGAGCTATCAGATGTTAAGCTGATAAGAACAGATACTACACTTTGATCTTAGCCTTT	AACATTTGTTGTCTTCCTATGGAAGAGCTATCAGATGTTAAGCTGATAAGAACAGATACTACACTTTGATAGATCGGAAGA	1	D1	CTATCAGATGTTAAGCTGATAAGAACAG	ATACTACACTTTGATCTTAGCCTTTA	0.142857	-{------(--------)------}-------		0.004496	U2 spliceosomal RNA	Anopheles arabiensis genome assembly, chromosome: 2	{'superkingdom': 'Eukaryota', 'phylum': 'Arthropoda', 'class': 'Insecta', 'order': 'Diptera', 'family': 'Culicidae', 'genus': 'Anopheles', 'species': 'Anopheles arabiensis'}	Anopheles arabiensis
AACATTTGTTGTCTTCCTATGGAAGAG	AACATTTGTTGTCTTCCTATGGAAGAGCTATCAGATGTTAAGCTGATAAGAACAGATACTACACTTTGATCTTAGCCTTT	AACATTTGTTGTCTTCCTATGGAAGAGCTATCAGATGTTAAGCTGATAAGAACAGATACTAGATAGATATTTGAAAGATCT	1	D1	CTATCAGATGTTAAGCTGATAAGAACAG	ATACTACACTTTGATCTTAGCCTTTA	0.142857	-{------(--------)------}-------		0.004496		Anopheles arabiensis genome assembly, chromosome: 2	{'superkingdom': 'Eukaryota', 'phylum': 'Arthropoda', 'class': 'Insecta', 'order': 'Diptera', 'family': 'Culicidae', 'genus': 'Anopheles', 'species': 'Anopheles arabiensis'}	Anopheles arabiensis
GCGCCTCCGTTACTCTTTAGGAGGCGA	GCGCCTCCGTTACTCTTTAGGAGGCGACCGCCCCAGTCAAACTGTCCATCTGACACTGTCTCCCAGCCGGATCACGGCTG	GCGCCTCCGTTACTCTTTAGGAGGCGACCGCCCCAGCCAAACTGCCCGCCTGACAATGTCCTATTACCAGTTTCATGGTAA	3	D1	CCGCCCCAGTCAAACTGTCCATCTGACA	CTGTCTCCCAGCCGGATCACGGCTGC	0.25		a----cta{Tta--a(-t-tc)at-g-A}a	0.00451246	23S ribosomal RNA	Jeotgalicoccus sp. WY2 chromosome, complete genome	{'superkingdom': 'Bacteria', 'phylum': 'Bacillota', 'class': 'Bacilli', 'order': 'Bacillales', 'family': 'Staphylococcaceae', 'genus': 'Jeotgalicoccus', 'species': 'Jeotgalicoccus sp. WY2'}	Jeotgalicoccus sp. WY2
GCGCCTCCGTTACTCTTTAGGAGGCGA	GCGCCTCCGTTACTCTTTAGGAGGCGACCGCCCCAGTCAAACTGTCCATCTGACACTGTCTCCCAGCCGGATCACGGCTG	GCGCCTCCGTTACTCTTTAGGAGGCGACCGCCCCAGTCAAACTGTCCATCTGACACTGTCTCCCACCATGATAAATGGTGC	2	D1	CCGCCCCAGTCAAACTGTCCATCTGACA	CTGTCTCCCAGCCGGATCACGGCTGC	0.166667		--------{--C-AT(---a-)AT-G--}-	0.00451246	23S ribosomal RNA	Jeotgalicoccus sp. WY2 chromosome, complete genome	{'superkingdom': 'Bacteria', 'phylum': 'Bacillota', 'class': 'Bacilli', 'order': 'Bacillales', 'family': 'Staphylococcaceae', 'genus': 'Jeotgalicoccus', 'species': 'Jeotgalicoccus sp. WY2'}	Jeotgalicoccus sp. WY2
GCGCCTCCGTTACTCTTTAGGAGGCGA	GCGCCTCCGTTACTCTTTAGGAGGCGACCGCCCCAGTCAAACTGTCCATCTGACACTGTCTCCCAGCCGGATCACGGCTG	GCGCCTCCGTTACTCTTTAGGAGGCGACCGCCCCAGCCAAACTGCCCGCCTGACAATGTCCTAGTACCAGATAATGGCACC	1	D1	CCGCCCCAGTCAAACTGTCCATCTGACA	CTGTCTCCCAGCCGGATCACGGCTGC	0.0833333		a----cta{GTa--A(---a-)T---AC}-	0.00451246	23S ribosomal RNA	Jeotgalicoccus sp. WY2 chromosome, complete genome	{'superkingdom': 'Bacteria', 'phylum': 'Bacillota', 'class': 'Bacilli', 'order': 'Bacillales', 'family': 'Staphylococcaceae', 'genus': 'Jeotgalicoccus', 'species': 'Jeotgalicoccus sp. WY2'}	Jeotgalicoccus sp. WY2
GCGCCTCCGTTACTCTTTAGGAGGCGA	GCGCCTCCGTTACTCTTTAGGAGGCGACCGCCCCAGTCAAACTGTCCATCTGACACTGTCTCCCAGCCGGATCACGGCTG	GCGCCTCCGTTACTCTTTAGGAGGCGACCGCCCCAGCCAAACTGCCCGCCTGACAATGTCCTAGTACCAGCTCATGGCACC	1	D1	CCGCCCCAGTCAAACTGTCCATCTGACA	CTGTCTCCCAGCCGGATCACGGCTGC	0.0833333		a----cta{GTa--A(-c---)T---AC}-	0.00451246	23S ribosomal RNA	Jeotgalicoccus sp. WY2 chromosome, complete genome	{'superkingdom': 'Bacteria', 'phylum': 'Bacillota', 'class': 'Bacilli', 'order': 'Bacillales', 'family': 'Staphylococcaceae', 'genus': 'Jeotgalicoccus', 'species': 'Jeotgalicoccus sp. WY2'}	Jeotgalicoccus sp. WY2
GCGCCTCCGTTACTCTTTAGGAGGCGA	GCGCCTCCGTTACTCTTTAGGAGGCGACCGCCCCAGTCAAACTGTCCATCTGACACTGTCTCCCAGCCGGATCACGGCTG	GCGCCTCCGTTACTCTTTAGGAGGCGACCGCCCCAGTCAAACTACCCACCTAACACTGTTCCCCGCCCGGATAACGGGCGC	1	D1	CCGCCCCAGTCAAACTGTCCATCTGACA	CTGTCTCCCAGCCGGATCACGGCTGC	0.0833333		----tc--{-GC---(---a-)---GC-}-	0.00451246	23S ribosomal RNA	Jeotgalicoccus sp. WY2 chromosome, complete genome	{'superkingdom': 'Bacteria', 'phylum': 'Bacillota', 'class': 'Bacilli', 'order': 'Bacillales', 'family': 'Staphylococcaceae', 'genus': 'Jeotgalicoccus', 'species': 'Jeotgalicoccus sp. WY2'}	Jeotgalicoccus sp. WY2
GCGCCTCCGTTACTCTTTAGGAGGCGA	GCGCCTCCGTTACTCTTTAGGAGGCGACCGCCCCAGTCAAACTGTCCATCTGACACTGTCTCCCAGCCGGATCACGGCTG	GCGCCTCCGTTACTCTTTAGGAGGCGACCGCCCCAGTCAAACTACCCACCTGACACTGTTCACCGCCCGGATTACGGAACG	1	D1	CCGCCCCAGTCAAACTGTCCATCTGACA	CTGTCTCCCAGCCGGATCACGGCTGC	0.0833333		----tca-{-gc---(---t-)---aac}g	0.00451246	23S ribosomal RNA	Jeotgalicoccus sp. WY2 chromosome, complete genome	{'superkingdom': 'Bacteria', 'phylum': 'Bacillota', 'class': 'Bacilli', 'order': 'Bacillales', 'family': 'Staphylococcaceae', 'genus': 'Jeotgalicoccus', 'species': 'Jeotgalicoccus sp. WY2'}	Jeotgalicoccus sp. WY2
GCGCCTCCGTTACTCTTTAGGAGGCGA	GCGCCTCCGTTACTCTTTAGGAGGCGACCGCCCCAGTCAAACTGTCCATCTGACACTGTCTCCCAGCCGGATCACGGCTG	GCGCCTCCGTTACTCTTTAGGAGGCGACCGCCCCAGTCAAACTCCCCACCAGCCGCTGTCCCCTGCCAGGATCACTGGCCC	1	D1	CCGCCCCAGTCAAACTGTCCATCTGACA	CTGTCTCCCAGCCGGATCACGGCTGC	0.0833333		-----c--{tGC-A-(-----)-T-GCc}-	0.00451246	23S ribosomal RNA	Jeotgalicoccus sp. WY2 chromosome, complete genome	{'superkingdom': 'Bacteria', 'phylum': 'Bacillota', 'class': 'Bacilli', 'order': 'Bacillales', 'family': 'Staphylococcaceae', 'genus': 'Jeotgalicoccus', 'species': 'Jeotgalicoccus sp. WY2'}	Jeotgalicoccus sp. WY2
GCGCCTCCGTTACTCTTTAGGAGGCGA	GCGCCTCCGTTACTCTTTAGGAGGCGACCGCCCCAGTCAAACTGTCCATCTGACACTGTCTCCCAGCCGGATCACGGCTG	GCGCCTCCGTTACTCTTTAGGAGGCGACCGCCCCAGTCAAACTCCCCACCAGCCGCTGTCCCCTGCCAGGCTCTCTGGCCC	1	D1	CCGCCCCAGTCAAACTGTCCATCTGACA	CTGTCTCCCAGCCGGATCACGGCTGC	0.0833333		-----c--{tGC-A-(-c--t)-T-GCc}-	0.00451246	23S ribosomal RNA	Jeotgalicoccus sp. WY2 chromosome, complete genome	{'superkingdom': 'Bacteria', 'phylum': 'Bacillota', 'class': 'Bacilli', 'order': 'Bacillales', 'family': 'Staphylococcaceae', 'genus': 'Jeotgalicoccus', 'species': 'Jeotgalicoccus sp. WY2'}	Jeotgalicoccus sp. WY2
GCGCCTCCGTTACTCTTTAGGAGGCGA	GCGCCTCCGTTACTCTTTAGGAGGCGACCGCCCCAGTCAAACTGTCCATCTGACACTGTCTCCCAGCCGGATCACGGCTG	GCGCCTCCGTTACTCTTTAGGAGGCGACCGCCCCAGTCAAACTGCCTAACTGACACTGTTCCTCACCCGGTTTCACGGAAT	1	D1	CCGCCCCAGTCAAACTGTCCATCTGACA	CTGTCTCCCAGCCGGATCACGGCTGC	0.0833333		----tc-t{--C---(-t-tc)ac-Gaa}t	0.00451246	23S ribosomal RNA	Jeotgalicoccus sp. WY2 chromosome, complete genome	{'superkingdom': 'Bacteria', 'phylum': 'Bacillota', 'class': 'Bacilli', 'order': 'Bacillales', 'family': 'Staphylococcaceae', 'genus': 'Jeotgalicoccus', 'species': 'Jeotgalicoccus sp. WY2'}	Jeotgalicoccus sp. WY2
TCTTGCATGATGTTATTGCAACTTACG	TCTTGCATGATGTTATTGCAACTTACGAACGCCGGGCCGCCCCTTGCCTGGGCGTGCCGGTCGGCGTACAAGATATCTGT	TCTTGCATGATGTTATTGCAACTTACGAACGTCGGGCCGCCCCTTGCCTGGGCGTGCCGGTCGACGTACAAGATATCTGTG	6	D2	AACGCCGGGCCGCCGCCGGTCGGCGTA	CCTTGCCTGGGCGTCAAGATATCTGTG	0.666667	-{---T--(-------------)--A---}-		0.00451246		Culex perexiguus isolate 28S_1_Cx_perexiguus_MG_S76 large subunit ribosomal RNA gene, partial sequence	{'superkingdom': 'Eukaryota', 'phylum': 'Arthropoda', 'class': 'Insecta', 'order': 'Diptera', 'family': 'Culicidae', 'genus': 'Culex', 'species': 'Culex perexiguus'}	Culex perexiguus
TCTTGCATGATGTTATTGCAACTTACG	TCTTGCATGATGTTATTGCAACTTACGAACGCCGGGCCGCCCCTTGCCTGGGCGTGCCGGTCGGCGTACAAGATATCTGT	TCTTGCATGATGTTATTGCAACTTACGAAAGATGGTGAACTATGCCTGATCAGGTTGAAGTCAGGGGAAACCCTGATGGAG	2	D2	AACGCCGGGCCGCCGCCGGTCGGCGTA	CCTTGCCTGGGCGTCAAGATATCTGTG	0.222222	-{-a-aT-(-tgaa-ttgaa--)-A-g-g}-		0.00451246	28S ribosomal RNA	Culex perexiguus isolate 28S_1_Cx_perexiguus_MG_S76 large subunit ribosomal RNA gene, partial sequence	{'superkingdom': 'Eukaryota', 'phylum': 'Arthropoda', 'class': 'Insecta', 'order': 'Diptera', 'family': 'Culicidae', 'genus': 'Culex', 'species': 'Culex perexiguus'}	Culex perexiguus
TCTTGCATGATGTTATTGCAACTTACG	TCTTGCATGATGTTATTGCAACTTACGAACGCCGGGCCGCCCCTTGCCTGGGCGTGCCGGTCGGCGTACAAGATATCTGT	TCTTGCATGATGTTATTGCAACTTACGAACGCCGGGCCGCCCCTTGCCTGGGCGTGCCGGTCGGCGTACAAGATAGATCGG	1	D2	AACGCCGGGCCGCCGCCGGTCGGCGTA	CCTTGCCTGGGCGTCAAGATATCTGTG	0.111111	-{------(-------------)------}-		0.00451246		Culex perexiguus isolate 28S_1_Cx_perexiguus_MG_S76 large subunit ribosomal RNA gene, partial sequence	{'superkingdom': 'Eukaryota', 'phylum': 'Arthropoda', 'class': 'Insecta', 'order': 'Diptera', 'family': 'Culicidae', 'genus': 'Culex', 'species': 'Culex perexiguus'}	Culex perexiguus
CATGCATGGCTTAACCTTTGAGACAAG	CATGCATGGCTTAACCTTTGAGACAAGCGTATATTACTGGTAGGATCAACCAGAATTCGTCGACATTAGCGCACACGCAGA	CATGCATGGCTTAACCTTTGAGACAAGCGTATATTACTGGTAGGATCAACCAGAATTCGTCAACATTAGCGCACGCAGATG	134	D1	CGTATATTACTGGTAGGATCAACCAGAA	TTCGTCGACATTAGCGCACACGCAGA	0.41875	---------{-----(-------)-----}--		0.00453101	18S ribosomal RNA	Culex torrentium clone torrentium2 28S ribosomal RNA gene, partial sequence; 28S-18S ribosomal RNA intergenic spacer, complete sequence; and 18S ribosomal RNA gene, partial sequence	{'superkingdom': 'Eukaryota', 'phylum': 'Arthropoda', 'class': 'Insecta', 'order': 'Diptera', 'family': 'Culicidae', 'genus': 'Culex', 'species': 'Culex torrentium'}	Culex torrentium
CATGCATGGCTTAACCTTTGAGACAAG	CATGCATGGCTTAACCTTTGAGACAAGCGTATATTACTGGTAGGATCAACCAGAATTCGTCGACATTAGCGCACACGCAGA	CATGCATGGCTTAACCTTTGAGACAAGCGTATATTACTGGTAGGATCAACCAGAATTCTCGTCGTGGATAGAACAACAACA	122	D1	CGTATATTACTGGTAGGATCAACCAGAA	TTCGTCGACATTAGCGCACACGCAGA	0.38125	---------{-----(-------)-----}--		0.00453101	18S ribosomal RNA	Culex torrentium clone torrentium2 28S ribosomal RNA gene, partial sequence; 28S-18S ribosomal RNA intergenic spacer, complete sequence; and 18S ribosomal RNA gene, partial sequence	{'superkingdom': 'Eukaryota', 'phylum': 'Arthropoda', 'class': 'Insecta', 'order': 'Diptera', 'family': 'Culicidae', 'genus': 'Culex', 'species': 'Culex torrentium'}	Culex torrentium
CATGCATGGCTTAACCTTTGAGACAAG	CATGCATGGCTTAACCTTTGAGACAAGCGTATATTACTGGTAGGATCAACCAGAATTCGTCGACATTAGCGCACACGCAGA	CATGCATGGCTTAACCTTTGAGACAAGCGTATATTACTGGTAGGATCAACCAGAATTCTTCGACACACGATACGACGATGT	64	D1	CGTATATTACTGGTAGGATCAACCAGAA	TTCGTCGACATTAGCGCACACGCAGA	0.2	---------{-----(-------)-----}--		0.00453101	18S ribosomal RNA	Culex torrentium clone torrentium2 28S ribosomal RNA gene, partial sequence; 28S-18S ribosomal RNA intergenic spacer, complete sequence; and 18S ribosomal RNA gene, partial sequence	{'superkingdom': 'Eukaryota', 'phylum': 'Arthropoda', 'class': 'Insecta', 'order': 'Diptera', 'family': 'Culicidae', 'genus': 'Culex', 'species': 'Culex torrentium'}	Culex torrentium
ATGCATGGCTTAACCTTTGAGACAAGC	ATGCATGGCTTAACCTTTGAGACAAGCGTATATTACTGGTAGGATCAACCAGAATTCGTCGACATTAGCGCACACGCAGAT	ATGCATGGCTTAACCTTTGAGACAAGCGTATATTACTGGTAGGATCAACCAGAATTCTCGTCGTGGATAGAACAACAACAA	48	D1	GTATATTACTGGTAGGATCAACCAGAAT	TCGTCGACATTAGCGCACACGCAGAT	0.457143	--------{-----(-------)-----}---		0.00453805	18S ribosomal RNA	Culex torrentium clone torrentium2 28S ribosomal RNA gene, partial sequence; 28S-18S ribosomal RNA intergenic spacer, complete sequence; and 18S ribosomal RNA gene, partial sequence	{'superkingdom': 'Eukaryota', 'phylum': 'Arthropoda', 'class': 'Insecta', 'order': 'Diptera', 'family': 'Culicidae', 'genus': 'Culex', 'species': 'Culex torrentium'}	Culex torrentium
ATGCATGGCTTAACCTTTGAGACAAGC	ATGCATGGCTTAACCTTTGAGACAAGCGTATATTACTGGTAGGATCAACCAGAATTCGTCGACATTAGCGCACACGCAGAT	ATGCATGGCTTAACCTTTGAGACAAGCGTATATTACTGGTAGGATCAACCAGAATTCGTCAACATTAGCGCACGCAGATGG	44	D1	GTATATTACTGGTAGGATCAACCAGAAT	TCGTCGACATTAGCGCACACGCAGAT	0.419048	--------{-----(-------)-----}---		0.00453805	18S ribosomal RNA	Culex torrentium clone torrentium2 28S ribosomal RNA gene, partial sequence; 28S-18S ribosomal RNA intergenic spacer, complete sequence; and 18S ribosomal RNA gene, partial sequence	{'superkingdom': 'Eukaryota', 'phylum': 'Arthropoda', 'class': 'Insecta', 'order': 'Diptera', 'family': 'Culicidae', 'genus': 'Culex', 'species': 'Culex torrentium'}	Culex torrentium
ATGCATGGCTTAACCTTTGAGACAAGC	ATGCATGGCTTAACCTTTGAGACAAGCGTATATTACTGGTAGGATCAACCAGAATTCGTCGACATTAGCGCACACGCAGAT	ATGCATGGCTTAACCTTTGAGACAAGCGTATATTACTGGTAGGATCAACCAGAATTCTTCGACACACGATACGACGATGTG	13	D1	GTATATTACTGGTAGGATCAACCAGAAT	TCGTCGACATTAGCGCACACGCAGAT	0.12381	--------{-----(-------)-----}---		0.00453805	18S ribosomal RNA	Culex torrentium clone torrentium2 28S ribosomal RNA gene, partial sequence; 28S-18S ribosomal RNA intergenic spacer, complete sequence; and 18S ribosomal RNA gene, partial sequence	{'superkingdom': 'Eukaryota', 'phylum': 'Arthropoda', 'class': 'Insecta', 'order': 'Diptera', 'family': 'Culicidae', 'genus': 'Culex', 'species': 'Culex torrentium'}	Culex torrentium
GGTCACCCATCTAAGTACTAATCGCGC	GGTCACCCATCTAAGTACTAATCGCGCCCGATGTTGCTTAACTTCGGTGATCGGACGAGAACCGGTGTTTTCAACAGATC	GGTCACCCATCTAAGTACTAATCGCGCCCGATGTTGCTTAACTTCAGTGATCGGACGAGAACTGGTGTTTTCAACAGATCG	1423	D1	CCGATGTTGCTTAACTTCGGTGATCGGA	CGAGAACCGGTGTTTTCAACAGATCG	0.295045	{-----(-------------a---)-----}-		0.00454784	5S ribosomal RNA	PREDICTED: Uranotaenia lowii 5S ribosomal RNA (LOC129740736), rRNA	{'superkingdom': 'Eukaryota', 'phylum': 'Arthropoda', 'class': 'Insecta', 'order': 'Diptera', 'family': 'Culicidae', 'genus': 'Uranotaenia', 'species': 'Uranotaenia lowii'}	Uranotaenia lowii
GGTCACCCATCTAAGTACTAATCGCGC	GGTCACCCATCTAAGTACTAATCGCGCCCGATGTTGCTTAACTTCGGTGATCGGACGAGAACCGGTGTTTTCAACAGATC	GGTCACCCATCTAAGTACTAATCGCGCCCGATGTTGCTTAACTTCGGTGATCGGACGAGAACCGGTGTTTTCAAGATCGGA	1285	D1	CCGATGTTGCTTAACTTCGGTGATCGGA	CGAGAACCGGTGTTTTCAACAGATCG	0.266432	{-----(-----------------)-----}-		0.00454784	5S ribosomal RNA	PREDICTED: Uranotaenia lowii 5S ribosomal RNA (LOC129740736), rRNA	{'superkingdom': 'Eukaryota', 'phylum': 'Arthropoda', 'class': 'Insecta', 'order': 'Diptera', 'family': 'Culicidae', 'genus': 'Uranotaenia', 'species': 'Uranotaenia lowii'}	Uranotaenia lowii
GGTCACCCATCTAAGTACTAATCGCGC	GGTCACCCATCTAAGTACTAATCGCGCCCGATGTTGCTTAACTTCGGTGATCGGACGAGAACCGGTGTTTTCAACAGATC	GGTCACCCATCTAAGTACTAATCGCGCCCGATGTTGCTTAACTTCAGTGATCGGACGAGAACTGGTGTTTTCAAGATCGGA	1028	D1	CCGATGTTGCTTAACTTCGGTGATCGGA	CGAGAACCGGTGTTTTCAACAGATCG	0.213145	{-----(-------------a---)-----}-		0.00454784	5S ribosomal RNA	PREDICTED: Uranotaenia lowii 5S ribosomal RNA (LOC129740736), rRNA	{'superkingdom': 'Eukaryota', 'phylum': 'Arthropoda', 'class': 'Insecta', 'order': 'Diptera', 'family': 'Culicidae', 'genus': 'Uranotaenia', 'species': 'Uranotaenia lowii'}	Uranotaenia lowii
GGTCACCCATCTAAGTACTAATCGCGC	GGTCACCCATCTAAGTACTAATCGCGCCCGATGTTGCTTAACTTCGGTGATCGGACGAGAACCGGTGTTTTCAACAGATC	GGTCACCCATCTAAGTACTAATCGCGCCCGATGTTGCTTAACTTCGGTGATCGGACGAGAACCGGTGTTTTCAAAGATCGG	579	D1	CCGATGTTGCTTAACTTCGGTGATCGGA	CGAGAACCGGTGTTTTCAACAGATCG	0.12005	{-----(-----------------)-----}-		0.00454784	5S ribosomal RNA	PREDICTED: Uranotaenia lowii 5S ribosomal RNA (LOC129740736), rRNA	{'superkingdom': 'Eukaryota', 'phylum': 'Arthropoda', 'class': 'Insecta', 'order': 'Diptera', 'family': 'Culicidae', 'genus': 'Uranotaenia', 'species': 'Uranotaenia lowii'}	Uranotaenia lowii
GGTCACCCATCTAAGTACTAATCGCGC	GGTCACCCATCTAAGTACTAATCGCGCCCGATGTTGCTTAACTTCGGTGATCGGACGAGAACCGGTGTTTTCAACAGATC	GGTCACCCATCTAAGTACTAATCGCGCCCGATGTTGCTTAACTTCAGTGATCGGACGAGAACTGGTGTTTTCAGATCGGAA	508	D1	CCGATGTTGCTTAACTTCGGTGATCGGA	CGAGAACCGGTGTTTTCAACAGATCG	0.105329	{-----(-------------a---)-----}-		0.00454784	5S ribosomal RNA	PREDICTED: Uranotaenia lowii 5S ribosomal RNA (LOC129740736), rRNA	{'superkingdom': 'Eukaryota', 'phylum': 'Arthropoda', 'class': 'Insecta', 'order': 'Diptera', 'family': 'Culicidae', 'genus': 'Uranotaenia', 'species': 'Uranotaenia lowii'}	Uranotaenia lowii
TTGGTATTAGTTTTCAACTAGCAATAA	TTGGTATTAGTTTTCAACTAGCAATAATCGCACCTCGGTTGTACCTCAGCAAGGTAATAGCAGCTGGGCTTGCGGAAAACA	TTGGTATTAGTTTTCAACTAGCAATAATCGCACCTCGGTTGTACCTCATTGGTTACGATATCGCCACTGCGAGATCGGAAG	3	D2	TCGCACCTCGGTTGAATAGCAGCTGGG	TACCTCAGCAAGGTCTTGCGGAAAACA	0.15		-------{tTgGt(ta)gCgAg}atcgg-ag	0.00454784	U4 spliceosomal RNA	Anopheles arabiensis genome assembly, chromosome: 2	{'superkingdom': 'Eukaryota', 'phylum': 'Arthropoda', 'class': 'Insecta', 'order': 'Diptera', 'family': 'Culicidae', 'genus': 'Anopheles', 'species': 'Anopheles arabiensis'}	Anopheles arabiensis
TTGGTATTAGTTTTCAACTAGCAATAA	TTGGTATTAGTTTTCAACTAGCAATAATCGCACCTCGGTTGTACCTCAGCAAGGTAATAGCAGCTGGGCTTGCGGAAAACA	TTGGTATTAGTTTTCAACTAGCAATAATCGCACCTCGGTTGTACCTCATTGGTTACGATATCGGAAGAGCCGACATCGAAG	3	D2	TCGCACCTCGGTTGAATAGCAGCTGGG	TACCTCAGCAAGGTCTTGCGGAAAACA	0.15		-------{TtGGt(ta)gCC-A}catcg-ag	0.00454784	U4 spliceosomal RNA	Anopheles arabiensis genome assembly, chromosome: 2	{'superkingdom': 'Eukaryota', 'phylum': 'Arthropoda', 'class': 'Insecta', 'order': 'Diptera', 'family': 'Culicidae', 'genus': 'Anopheles', 'species': 'Anopheles arabiensis'}	Anopheles arabiensis
TTGGTATTAGTTTTCAACTAGCAATAA	TTGGTATTAGTTTTCAACTAGCAATAATCGCACCTCGGTTGTACCTCAGCAAGGTAATAGCAGCTGGGCTTGCGGAAAACA	TTGGTATTAGTTTTCAACTAGCAATAATCGCACCTCGGATGTACCTCATATCGCCTTCGATCCTCTAACTTTCGTTCTTGA	2	D2	TCGCACCTCGGTTGAATAGCAGCTGGG	TACCTCAGCAAGGTCTTGCGGAAAACA	0.1		-------{tAtc-(cc)---T-}-ttcttg-	0.00454784		Anopheles arabiensis genome assembly, chromosome: 2	{'superkingdom': 'Eukaryota', 'phylum': 'Arthropoda', 'class': 'Insecta', 'order': 'Diptera', 'family': 'Culicidae', 'genus': 'Anopheles', 'species': 'Anopheles arabiensis'}	Anopheles arabiensis
TTGGTATTAGTTTTCAACTAGCAATAA	TTGGTATTAGTTTTCAACTAGCAATAATCGCACCTCGGTTGTACCTCAGCAAGGTAATAGCAGCTGGGCTTGCGGAAAACA	TTGGTATTAGTTTTCAACTAGCAATAATCGCACCTCGGATGTACCTCATTGAGAAAGGGCTCTGTCTTCGAGATCAGATCA	2	D2	TCGCACCTCGGTTGAATAGCAGCTGGG	TACCTCAGCAAGGTCTTGCGGAAAACA	0.1		-------{Ttg--(aa)-ga-A}tc-g-t--	0.00454784		Anopheles arabiensis genome assembly, chromosome: 2	{'superkingdom': 'Eukaryota', 'phylum': 'Arthropoda', 'class': 'Insecta', 'order': 'Diptera', 'family': 'Culicidae', 'genus': 'Anopheles', 'species': 'Anopheles arabiensis'}	Anopheles arabiensis
TTGGTATTAGTTTTCAACTAGCAATAA	TTGGTATTAGTTTTCAACTAGCAATAATCGCACCTCGGTTGTACCTCAGCAAGGTAATAGCAGCTGGGCTTGCGGAAAACA	TTGGTATTAGTTTTCAACTAGCAATAATCGCACCTCGGATGTACCTCATTGGTTACGATATCGCCAAGATCGGAAGACACA	2	D2	TCGCACCTCGGTTGAATAGCAGCTGGG	TACCTCAGCAAGGTCTTGCGGAAAACA	0.1		-------{ttGgT(ta)A-C-g}aag-c---	0.00454784	U4 spliceosomal RNA	Anopheles arabiensis genome assembly, chromosome: 2	{'superkingdom': 'Eukaryota', 'phylum': 'Arthropoda', 'class': 'Insecta', 'order': 'Diptera', 'family': 'Culicidae', 'genus': 'Anopheles', 'species': 'Anopheles arabiensis'}	Anopheles arabiensis
TTGGTATTAGTTTTCAACTAGCAATAA	TTGGTATTAGTTTTCAACTAGCAATAATCGCACCTCGGTTGTACCTCAGCAAGGTAATAGCAGCTGGGCTTGCGGAAAACA	TTGGTATTAGTTTTCAACTAGCAATAATCGCACCTCGGATGTACCTCATTGGTTCCTCCACTTCAGTCATCCAAGATCTCA	2	D2	TCGCACCTCGGTTGAATAGCAGCTGGG	TACCTCAGCAAGGTCTTGCGGAAAACA	0.1		-------{TtGgT(tc)A-CcA}a--tct--	0.00454784		Anopheles arabiensis genome assembly, chromosome: 2	{'superkingdom': 'Eukaryota', 'phylum': 'Arthropoda', 'class': 'Insecta', 'order': 'Diptera', 'family': 'Culicidae', 'genus': 'Anopheles', 'species': 'Anopheles arabiensis'}	Anopheles arabiensis
TTGGTATTAGTTTTCAACTAGCAATAA	TTGGTATTAGTTTTCAACTAGCAATAATCGCACCTCGGTTGTACCTCAGCAAGGTAATAGCAGCTGGGCTTGCGGAAAACA	TTGGTATTAGTTTTCAACTAGCAATAATCGCACCTCGGTAGAACCTCATCAACGCTAGCTAATGACCAGCACTTACTGGGA	2	D2	TCGCACCTCGGTTGAATAGCAGCTGGG	TACCTCAGCAAGGTCTTGCGGAAAACA	0.1		a------{t---C(-c)Gcact}tactggg-	0.00454784		Anopheles arabiensis genome assembly, chromosome: 2	{'superkingdom': 'Eukaryota', 'phylum': 'Arthropoda', 'class': 'Insecta', 'order': 'Diptera', 'family': 'Culicidae', 'genus': 'Anopheles', 'species': 'Anopheles arabiensis'}	Anopheles arabiensis
TTGGTATTAGTTTTCAACTAGCAATAA	TTGGTATTAGTTTTCAACTAGCAATAATCGCACCTCGGTTGTACCTCAGCAAGGTAATAGCAGCTGGGCTTGCGGAAAACA	TTGGTATTAGTTTTCAACTAGCAATAATCGCACCTCGGTTGTACCTCATTGGTTACGATATCGCCACTGCAGATCGGAAGA	2	D2	TCGCACCTCGGTTGAATAGCAGCTGGG	TACCTCAGCAAGGTCTTGCGGAAAACA	0.1		-------{TtgGt(ta)gCa-A}tcgg--g-	0.00454784	U4 spliceosomal RNA	Anopheles arabiensis genome assembly, chromosome: 2	{'superkingdom': 'Eukaryota', 'phylum': 'Arthropoda', 'class': 'Insecta', 'order': 'Diptera', 'family': 'Culicidae', 'genus': 'Anopheles', 'species': 'Anopheles arabiensis'}	Anopheles arabiensis
TTGGTATTAGTTTTCAACTAGCAATAA	TTGGTATTAGTTTTCAACTAGCAATAATCGCACCTCGGTTGTACCTCAGCAAGGTAATAGCAGCTGGGCTTGCGGAAAACA	TTGGTATTAGTTTTCAACTAGCAATAATCGCACCTCGGTTGTACCTCATTGGTTACGATATCGCTCTCCTCCACTTCAGTC	2	D2	TCGCACCTCGGTTGAATAGCAGCTGGG	TACCTCAGCAAGGTCTTGCGGAAAACA	0.1		-------{TtGgt(ta)--CcA}cttc-gtc	0.00454784	U4 spliceosomal RNA	Anopheles arabiensis genome assembly, chromosome: 2	{'superkingdom': 'Eukaryota', 'phylum': 'Arthropoda', 'class': 'Insecta', 'order': 'Diptera', 'family': 'Culicidae', 'genus': 'Anopheles', 'species': 'Anopheles arabiensis'}	Anopheles arabiensis
TGCATGGCTTAACCTTTGAGACAAGCG	TGCATGGCTTAACCTTTGAGACAAGCGTATATTACTGGTAGGATCAACCAGAATTCGTCGACATTAGCGCACACGCAGAT	TGCATGGCTTAACCTTTGAGACAAGCGTATATTACTGGTAGGATCAACCAGAATTCGTCAACATTAGCGCACGCAGATGGA	341	D1	TATATTACTGGTAGGATCAACCAGAATT	CGTCGACATTAGCGCACACGCAGATG	0.435504	-------{-----(-------)-----}----		0.00480862	18S ribosomal RNA	Culex torrentium clone torrentium2 28S ribosomal RNA gene, partial sequence; 28S-18S ribosomal RNA intergenic spacer, complete sequence; and 18S ribosomal RNA gene, partial sequence	{'superkingdom': 'Eukaryota', 'phylum': 'Arthropoda', 'class': 'Insecta', 'order': 'Diptera', 'family': 'Culicidae', 'genus': 'Culex', 'species': 'Culex torrentium'}	Culex torrentium
TGCATGGCTTAACCTTTGAGACAAGCG	TGCATGGCTTAACCTTTGAGACAAGCGTATATTACTGGTAGGATCAACCAGAATTCGTCGACATTAGCGCACACGCAGAT	TGCATGGCTTAACCTTTGAGACAAGCGTATATTACTGGTAGGATCAACCAGAATTCTCGTCGTGGATAGAACAACAACAAC	289	D1	TATATTACTGGTAGGATCAACCAGAATT	CGTCGACATTAGCGCACACGCAGATG	0.369093	-------{-----(-------)-----}----		0.00480862	18S ribosomal RNA	Culex torrentium clone torrentium2 28S ribosomal RNA gene, partial sequence; 28S-18S ribosomal RNA intergenic spacer, complete sequence; and 18S ribosomal RNA gene, partial sequence	{'superkingdom': 'Eukaryota', 'phylum': 'Arthropoda', 'class': 'Insecta', 'order': 'Diptera', 'family': 'Culicidae', 'genus': 'Culex', 'species': 'Culex torrentium'}	Culex torrentium
TGCATGGCTTAACCTTTGAGACAAGCG	TGCATGGCTTAACCTTTGAGACAAGCGTATATTACTGGTAGGATCAACCAGAATTCGTCGACATTAGCGCACACGCAGAT	TGCATGGCTTAACCTTTGAGACAAGCGTATATTACTGGTAGGATCAACCAGAATTCTTCGACACACGATACGACGATGTGC	153	D1	TATATTACTGGTAGGATCAACCAGAATT	CGTCGACATTAGCGCACACGCAGATG	0.195402	-------{-----(-------)-----}----		0.00480862	18S ribosomal RNA	Culex torrentium clone torrentium2 28S ribosomal RNA gene, partial sequence; 28S-18S ribosomal RNA intergenic spacer, complete sequence; and 18S ribosomal RNA gene, partial sequence	{'superkingdom': 'Eukaryota', 'phylum': 'Arthropoda', 'class': 'Insecta', 'order': 'Diptera', 'family': 'Culicidae', 'genus': 'Culex', 'species': 'Culex torrentium'}	Culex torrentium
TTCGTGTGTCCTGCAGTTCACATTCTG	TTCGTGTGTCCTGCAGTTCACATTCTGACGCGCATTTAGCTGCGGTCTTCATCGATCCACGAGCCGAGTGATCCCCAGATC	TTCGTGTGTCCTGCAGTTCACATTCTGACGCGCATTTAGCTGCGGTCTTCATCGATCCACGAGCCGAGTGATCCCCTGAGA	17	D2	ACGCGCATTTAGCTTCCACGAGCCGAG	GCGGTCTTCATCGATGATCCCCAGATC	0.278689		-------{-----()-----}-----t--ga	0.00489808	5.8S ribosomal RNA	Culex tritaeniorhynchus clone C8726 18S ribosomal RNA gene, partial sequence; internal transcribed spacer 1, 5.8S ribosomal RNA gene, and internal transcribed spacer 2, complete sequence; and 28S ribosomal RNA gene, partial sequence	{'superkingdom': 'Eukaryota', 'phylum': 'Arthropoda', 'class': 'Insecta', 'order': 'Diptera', 'family': 'Culicidae', 'genus': 'Culex', 'species': 'Culex tritaeniorhynchus'}	Culex tritaeniorhynchus
TTCGTGTGTCCTGCAGTTCACATTCTG	TTCGTGTGTCCTGCAGTTCACATTCTGACGCGCATTTAGCTGCGGTCTTCATCGATCCACGAGCCGAGTGATCCCCAGATC	TTCGTGTGTCCTGCAGTTCACATTCTGACGCGCATTTAGCTGCGGTCTTCATCGATCCACGAGCCGAGTGATCCAGATCGG	14	D2	ACGCGCATTTAGCTTCCACGAGCCGAG	GCGGTCTTCATCGATGATCCCCAGATC	0.229508		-------{-----()-----}---ag-tcgg	0.00489808	5.8S ribosomal RNA	Culex tritaeniorhynchus clone C8726 18S ribosomal RNA gene, partial sequence; internal transcribed spacer 1, 5.8S ribosomal RNA gene, and internal transcribed spacer 2, complete sequence; and 28S ribosomal RNA gene, partial sequence	{'superkingdom': 'Eukaryota', 'phylum': 'Arthropoda', 'class': 'Insecta', 'order': 'Diptera', 'family': 'Culicidae', 'genus': 'Culex', 'species': 'Culex tritaeniorhynchus'}	Culex tritaeniorhynchus
TTCGTGTGTCCTGCAGTTCACATTCTG	TTCGTGTGTCCTGCAGTTCACATTCTGACGCGCATTTAGCTGCGGTCTTCATCGATCCACGAGCCGAGTGATCCCCAGATC	TTCGTGTGTCCTGCAGTTCACATTCTGACGCGCATTTAGCTGCGGTCTTCATCGATCCACGAGCCGAGTGATCAGATCGGA	13	D2	ACGCGCATTTAGCTTCCACGAGCCGAG	GCGGTCTTCATCGATGATCCCCAGATC	0.213115		-------{-----()-----}--agatcgga	0.00489808	5.8S ribosomal RNA	Culex tritaeniorhynchus clone C8726 18S ribosomal RNA gene, partial sequence; internal transcribed spacer 1, 5.8S ribosomal RNA gene, and internal transcribed spacer 2, complete sequence; and 28S ribosomal RNA gene, partial sequence	{'superkingdom': 'Eukaryota', 'phylum': 'Arthropoda', 'class': 'Insecta', 'order': 'Diptera', 'family': 'Culicidae', 'genus': 'Culex', 'species': 'Culex tritaeniorhynchus'}	Culex tritaeniorhynchus
TTCGTGTGTCCTGCAGTTCACATTCTG	TTCGTGTGTCCTGCAGTTCACATTCTGACGCGCATTTAGCTGCGGTCTTCATCGATCCACGAGCCGAGTGATCCCCAGATC	TTCGTGTGTCCTGCAGTTCACATTCTGACGCGCATTTAGCTGCGGTCTTCATCGATCCACGAGCCGAGTGATCCCAGATCG	10	D2	ACGCGCATTTAGCTTCCACGAGCCGAG	GCGGTCTTCATCGATGATCCCCAGATC	0.163934		-------{-----()-----}----agatcg	0.00489808	5.8S ribosomal RNA	Culex tritaeniorhynchus clone C8726 18S ribosomal RNA gene, partial sequence; internal transcribed spacer 1, 5.8S ribosomal RNA gene, and internal transcribed spacer 2, complete sequence; and 28S ribosomal RNA gene, partial sequence	{'superkingdom': 'Eukaryota', 'phylum': 'Arthropoda', 'class': 'Insecta', 'order': 'Diptera', 'family': 'Culicidae', 'genus': 'Culex', 'species': 'Culex tritaeniorhynchus'}	Culex tritaeniorhynchus
TTCGTGTGTCCTGCAGTTCACATTCTG	TTCGTGTGTCCTGCAGTTCACATTCTGACGCGCATTTAGCTGCGGTCTTCATCGATCCACGAGCCGAGTGATCCCCAGATC	TTCGTGTGTCCTGCAGTTCACATTCTGACGCGCATTTAGCTGCGGTCTTCATCGATCCACGAGCCGAGTGAGATCGGAAGA	7	D2	ACGCGCATTTAGCTTCCACGAGCCGAG	GCGGTCTTCATCGATGATCCCCAGATC	0.114754		-------{-----()-----}gat-gga-ga	0.00489808	5.8S ribosomal RNA	Culex tritaeniorhynchus clone C8726 18S ribosomal RNA gene, partial sequence; internal transcribed spacer 1, 5.8S ribosomal RNA gene, and internal transcribed spacer 2, complete sequence; and 28S ribosomal RNA gene, partial sequence	{'superkingdom': 'Eukaryota', 'phylum': 'Arthropoda', 'class': 'Insecta', 'order': 'Diptera', 'family': 'Culicidae', 'genus': 'Culex', 'species': 'Culex tritaeniorhynchus'}	Culex tritaeniorhynchus
CTTAGACATGCATGGCTTAACCTTTGA	CTTAGACATGCATGGCTTAACCTTTGAGACAAGCGTATATTACTGGTAGGATCAACCAGAATTCGTCGACATTAGCGCACA	CTTAGACATGCATGGCTTAACCTTTGAGACAAGCGTATATTACTGGTAGGATCAACCAGAATTCGTCAACATTAGCGCACG	2521	D3	GACAAGCGTATATTACATTAGCGCACA	ACTGGTAGGATCAACCAGAATTCGTCG	0.478822		-{-----(-------)-----}--------a	0.0049858	18S ribosomal RNA	Culex torrentium clone torrentium2 28S ribosomal RNA gene, partial sequence; 28S-18S ribosomal RNA intergenic spacer, complete sequence; and 18S ribosomal RNA gene, partial sequence	{'superkingdom': 'Eukaryota', 'phylum': 'Arthropoda', 'class': 'Insecta', 'order': 'Diptera', 'family': 'Culicidae', 'genus': 'Culex', 'species': 'Culex torrentium'}	Culex torrentium
CTTAGACATGCATGGCTTAACCTTTGA	CTTAGACATGCATGGCTTAACCTTTGAGACAAGCGTATATTACTGGTAGGATCAACCAGAATTCGTCGACATTAGCGCACA	CTTAGACATGCATGGCTTAACCTTTGAGACAAGCGTATATTACTGGTAGGATCAACCAGAATTCTCGTCGTGGATAGAACA	1545	D3	GACAAGCGTATATTACATTAGCGCACA	ACTGGTAGGATCAACCAGAATTCGTCG	0.293447		-{-----(-------)-----}-----tcgt	0.0049858	18S ribosomal RNA	Culex torrentium clone torrentium2 28S ribosomal RNA gene, partial sequence; 28S-18S ribosomal RNA intergenic spacer, complete sequence; and 18S ribosomal RNA gene, partial sequence	{'superkingdom': 'Eukaryota', 'phylum': 'Arthropoda', 'class': 'Insecta', 'order': 'Diptera', 'family': 'Culicidae', 'genus': 'Culex', 'species': 'Culex torrentium'}	Culex torrentium
CTTAGACATGCATGGCTTAACCTTTGA	CTTAGACATGCATGGCTTAACCTTTGAGACAAGCGTATATTACTGGTAGGATCAACCAGAATTCGTCGACATTAGCGCACA	CTTAGACATGCATGGCTTAACCTTTGAGACAAGCGTATATTACTGGTAGGATCAACCAGAATTCTTCGACACACGATACGA	682	D3	GACAAGCGTATATTACATTAGCGCACA	ACTGGTAGGATCAACCAGAATTCGTCG	0.129535		-{-----(-------)-----}-----t---	0.0049858	18S ribosomal RNA	Culex torrentium clone torrentium2 28S ribosomal RNA gene, partial sequence; 28S-18S ribosomal RNA intergenic spacer, complete sequence; and 18S ribosomal RNA gene, partial sequence	{'superkingdom': 'Eukaryota', 'phylum': 'Arthropoda', 'class': 'Insecta', 'order': 'Diptera', 'family': 'Culicidae', 'genus': 'Culex', 'species': 'Culex torrentium'}	Culex torrentium
CTTAGACATGCATGGCTTAACCTTTGA	CTTAGACATGCATGGCTTAACCTTTGAGACAAGCGTATATTACTGGTAGGATCAACCAGAATTCGTCGACATTAGCGCACA	CTTAGACATGCATGGCTTAACCTTTGAGACAAGCGTATATTACTGGTAGGATCAACCAGAATTCGTCAACATTATCACATC	517	D3	GACAAGCGTATATTACATTAGCGCACA	ACTGGTAGGATCAACCAGAATTCGTCG	0.0981956		-{-----(-------)-----}--------a	0.0049858	18S ribosomal RNA	Culex torrentium clone torrentium2 28S ribosomal RNA gene, partial sequence; 28S-18S ribosomal RNA intergenic spacer, complete sequence; and 18S ribosomal RNA gene, partial sequence	{'superkingdom': 'Eukaryota', 'phylum': 'Arthropoda', 'class': 'Insecta', 'order': 'Diptera', 'family': 'Culicidae', 'genus': 'Culex', 'species': 'Culex torrentium'}	Culex torrentium
ACTTAGACATGCATGGCTTAACCTTTG	ACTTAGACATGCATGGCTTAACCTTTGAGACAAGCGTATATTACTGGTAGGATCAACCAGAATTCGTCGACATTAGCGCAC	ACTTAGACATGCATGGCTTAACCTTTGAGACAAGCGTATATTACTGGTAGGATCAACCAGAATTCTCGTCGTGGATAGAAC	237	D3	AGACAAGCGTATATGACATTAGCGCAC	TACTGGTAGGATCAACCAGAATTCGTC	0.473054		--{-----(-------)-----}-----tcg	0.00499141	18S ribosomal RNA	Culex torrentium clone torrentium2 28S ribosomal RNA gene, partial sequence; 28S-18S ribosomal RNA intergenic spacer, complete sequence; and 18S ribosomal RNA gene, partial sequence	{'superkingdom': 'Eukaryota', 'phylum': 'Arthropoda', 'class': 'Insecta', 'order': 'Diptera', 'family': 'Culicidae', 'genus': 'Culex', 'species': 'Culex torrentium'}	Culex torrentium
ACTTAGACATGCATGGCTTAACCTTTG	ACTTAGACATGCATGGCTTAACCTTTGAGACAAGCGTATATTACTGGTAGGATCAACCAGAATTCGTCGACATTAGCGCAC	ACTTAGACATGCATGGCTTAACCTTTGAGACAAGCGTATATTACTGGTAGGATCAACCAGAATTCTTCGACACACGATACG	132	D3	AGACAAGCGTATATGACATTAGCGCAC	TACTGGTAGGATCAACCAGAATTCGTC	0.263473		--{-----(-------)-----}-----t--	0.00499141	18S ribosomal RNA	Culex torrentium clone torrentium2 28S ribosomal RNA gene, partial sequence; 28S-18S ribosomal RNA intergenic spacer, complete sequence; and 18S ribosomal RNA gene, partial sequence	{'superkingdom': 'Eukaryota', 'phylum': 'Arthropoda', 'class': 'Insecta', 'order': 'Diptera', 'family': 'Culicidae', 'genus': 'Culex', 'species': 'Culex torrentium'}	Culex torrentium
ACTTAGACATGCATGGCTTAACCTTTG	ACTTAGACATGCATGGCTTAACCTTTGAGACAAGCGTATATTACTGGTAGGATCAACCAGAATTCGTCGACATTAGCGCAC	ACTTAGACATGCATGGCTTAACCTTTGAGACAAGCGTATATTACTGGTAGGATCAACCAGAATTCGTCAACATTATCACAT	77	D3	AGACAAGCGTATATGACATTAGCGCAC	TACTGGTAGGATCAACCAGAATTCGTC	0.153693		--{-----(-------)-----}--------	0.00499141	18S ribosomal RNA	Culex torrentium clone torrentium2 28S ribosomal RNA gene, partial sequence; 28S-18S ribosomal RNA intergenic spacer, complete sequence; and 18S ribosomal RNA gene, partial sequence	{'superkingdom': 'Eukaryota', 'phylum': 'Arthropoda', 'class': 'Insecta', 'order': 'Diptera', 'family': 'Culicidae', 'genus': 'Culex', 'species': 'Culex torrentium'}	Culex torrentium
ACTTAGACATGCATGGCTTAACCTTTG	ACTTAGACATGCATGGCTTAACCTTTGAGACAAGCGTATATTACTGGTAGGATCAACCAGAATTCGTCGACATTAGCGCAC	ACTTAGACATGCATGGCTTAACCTTTGAGACAAGCGTATATTACTGGTAGGATCAACCAGAATTCGTCAGCATCGCCACAG	55	D3	AGACAAGCGTATATGACATTAGCGCAC	TACTGGTAGGATCAACCAGAATTCGTC	0.10978		--{-----(-------)-----}--------	0.00499141	18S ribosomal RNA	Culex torrentium clone torrentium2 28S ribosomal RNA gene, partial sequence; 28S-18S ribosomal RNA intergenic spacer, complete sequence; and 18S ribosomal RNA gene, partial sequence	{'superkingdom': 'Eukaryota', 'phylum': 'Arthropoda', 'class': 'Insecta', 'order': 'Diptera', 'family': 'Culicidae', 'genus': 'Culex', 'species': 'Culex torrentium'}	Culex torrentium
GGAGCTGGAATTACCGCGGCTCTGGCA	GGAGCTGGAATTACCGCGGCTCTGGCACCAGACTTGCCCTCCACTTGATCCTTACCGAAGGATTTATGCTCGGTTCATTC	GGAGCTGGAATTACCGCGGCTCTGGCACCAGACTTGCCCTCCACTTGATCCTTATTGAAGGATTTATGCTCAACTCATTCC	3	D3	CCAGACTTGCCCTCCTCGGTTCATTCC	CACTTGATCCTTACCGAAGGATTTATG	0.6		------{------(-tt-)------}-----	0.00504522	18S ribosomal RNA	Culex tritaeniorhynchus isolate MG_S115 small subunit ribosomal RNA, partial sequence	{'superkingdom': 'Eukaryota', 'phylum': 'Arthropoda', 'class': 'Insecta', 'order': 'Diptera', 'family': 'Culicidae', 'genus': 'Culex', 'species': 'Culex tritaeniorhynchus'}	Culex tritaeniorhynchus
GGAGCTGGAATTACCGCGGCTCTGGCA	GGAGCTGGAATTACCGCGGCTCTGGCACCAGACTTGCCCTCCACTTGATCCTTACCGAAGGATTTATGCTCGGTTCATTC	GGAGCTGGAATTACCGCGGCTCTGGCACCAGACTTGCCCTCCACTTGATCCTTACCGAAGGATTATGCTCGGTTCATTCCA	1	D3	CCAGACTTGCCCTCCTCGGTTCATTCC	CACTTGATCCTTACCGAAGGATTTATG	0.2		------{------(----)------}-atgc	0.00504522	18S ribosomal RNA	Culex tritaeniorhynchus isolate MG_S115 small subunit ribosomal RNA, partial sequence	{'superkingdom': 'Eukaryota', 'phylum': 'Arthropoda', 'class': 'Insecta', 'order': 'Diptera', 'family': 'Culicidae', 'genus': 'Culex', 'species': 'Culex tritaeniorhynchus'}	Culex tritaeniorhynchus
GGAGCTGGAATTACCGCGGCTCTGGCA	GGAGCTGGAATTACCGCGGCTCTGGCACCAGACTTGCCCTCCACTTGATCCTTACCGAAGGATTTATGCTCGGTTCATTC	GGAGCTGGAATTACCGCGGCTCTGGCACCTGAGTTGCCCTCCACTTGATCCTTGTTGAAGGATTTATGCTCAACTCATTCC	1	D3	CCAGACTTGCCCTCCTCGGTTCATTCC	CACTTGATCCTTACCGAAGGATTTATG	0.2		------{------(gtt-)------}-----	0.00504522	18S ribosomal RNA	Culex tritaeniorhynchus isolate MG_S115 small subunit ribosomal RNA, partial sequence	{'superkingdom': 'Eukaryota', 'phylum': 'Arthropoda', 'class': 'Insecta', 'order': 'Diptera', 'family': 'Culicidae', 'genus': 'Culex', 'species': 'Culex tritaeniorhynchus'}	Culex tritaeniorhynchus
GGCATGCATGGCTTAACCTTTGAGACA	GGCATGCATGGCTTAACCTTTGAGACAAGCGTATATTACTGGTAGGATCAACCAGAATTCGTCGACATTAGCGCACACGC	GGCATGCATGGCTTAACCTTTGAGACAAGCGTATATTACTGGTAGGATCAACCAGAATTCGTCAACATTAGCGCACGCAGA	32	D1	AGCGTATATTACTGGTAGGATCAACCAG	AATTCGTCGACATTAGCGCACACGCA	0.432432	-----------{-----(-------)-----}		0.00532366	18S ribosomal RNA	Culex torrentium clone torrentium2 28S ribosomal RNA gene, partial sequence; 28S-18S ribosomal RNA intergenic spacer, complete sequence; and 18S ribosomal RNA gene, partial sequence	{'superkingdom': 'Eukaryota', 'phylum': 'Arthropoda', 'class': 'Insecta', 'order': 'Diptera', 'family': 'Culicidae', 'genus': 'Culex', 'species': 'Culex torrentium'}	Culex torrentium
GGCATGCATGGCTTAACCTTTGAGACA	GGCATGCATGGCTTAACCTTTGAGACAAGCGTATATTACTGGTAGGATCAACCAGAATTCGTCGACATTAGCGCACACGC	GGCATGCATGGCTTAACCTTTGAGACAAGCGTATATTACTGGTAGGATCAACCAGAATTCTCGTCGTGGATAGAACAACAA	24	D1	AGCGTATATTACTGGTAGGATCAACCAG	AATTCGTCGACATTAGCGCACACGCA	0.324324	-----------{-----(-------)-----}		0.00532366	18S ribosomal RNA	Culex torrentium clone torrentium2 28S ribosomal RNA gene, partial sequence; 28S-18S ribosomal RNA intergenic spacer, complete sequence; and 18S ribosomal RNA gene, partial sequence	{'superkingdom': 'Eukaryota', 'phylum': 'Arthropoda', 'class': 'Insecta', 'order': 'Diptera', 'family': 'Culicidae', 'genus': 'Culex', 'species': 'Culex torrentium'}	Culex torrentium
GGCATGCATGGCTTAACCTTTGAGACA	GGCATGCATGGCTTAACCTTTGAGACAAGCGTATATTACTGGTAGGATCAACCAGAATTCGTCGACATTAGCGCACACGC	GGCATGCATGGCTTAACCTTTGAGACAAGCGTATATTACTGGTAGGATCAACCAGAATTCTTCGACACACGATACGACGAT	10	D1	AGCGTATATTACTGGTAGGATCAACCAG	AATTCGTCGACATTAGCGCACACGCA	0.135135	-----------{-----(-------)-----}		0.00532366	18S ribosomal RNA	Culex torrentium clone torrentium2 28S ribosomal RNA gene, partial sequence; 28S-18S ribosomal RNA intergenic spacer, complete sequence; and 18S ribosomal RNA gene, partial sequence	{'superkingdom': 'Eukaryota', 'phylum': 'Arthropoda', 'class': 'Insecta', 'order': 'Diptera', 'family': 'Culicidae', 'genus': 'Culex', 'species': 'Culex torrentium'}	Culex torrentium
GGCATGCATGGCTTAACCTTTGAGACA	GGCATGCATGGCTTAACCTTTGAGACAAGCGTATATTACTGGTAGGATCAACCAGAATTCGTCGACATTAGCGCACACGC	GGCATGCATGGCTTAACCTTTGAGACAAGCGTATATTACTGGTAGGATCAACCAGAATTCGTCAACATTATCACATCGTCA	8	D1	AGCGTATATTACTGGTAGGATCAACCAG	AATTCGTCGACATTAGCGCACACGCA	0.108108	-----------{-----(-------)-----}		0.00532366	18S ribosomal RNA	Culex torrentium clone torrentium2 28S ribosomal RNA gene, partial sequence; 28S-18S ribosomal RNA intergenic spacer, complete sequence; and 18S ribosomal RNA gene, partial sequence	{'superkingdom': 'Eukaryota', 'phylum': 'Arthropoda', 'class': 'Insecta', 'order': 'Diptera', 'family': 'Culicidae', 'genus': 'Culex', 'species': 'Culex torrentium'}	Culex torrentium
CCCGGAACCCAAAAACTTTGATTTCTC	CCCGGAACCCAAAAACTTTGATTTCTCATAAGGTGCCAGCGGAGTCCTAAAAGCAACATCCGCTGATCCCTGGTCGGCATC	CCCGGAACCCAAAAACTTTGATTTCTCGTAAGGTGCCGAACGGGTCAAAATACTAACACCGTCCGATCCCTAGTCGGCATA	4	D2	ATAAGGTGCCAGCGACATCCGCTGATC	GAGTCCTAAAAGCACCTGGTCGGCATC	0.5	g--------{-GaAC(---c-)GT-C-}---		0.00541474	18S ribosomal RNA	Brassica nigra genome assembly, chromosome: 1	{'superkingdom': 'Eukaryota', 'phylum': 'Streptophyta', 'class': 'Magnoliopsida', 'order': 'Brassicales', 'family': 'Brassicaceae', 'genus': 'Brassica', 'species': 'Brassica nigra'}	Brassica nigra
CCCGGAACCCAAAAACTTTGATTTCTC	CCCGGAACCCAAAAACTTTGATTTCTCATAAGGTGCCAGCGGAGTCCTAAAAGCAACATCCGCTGATCCCTGGTCGGCATC	CCCGGAACCCAAAAACTTTGATTTCTCATAAGGTGCTGGCGGAGTCCTATAAGCAACATCCGCCAATCCCTGGTCGGCATC	2	D2	ATAAGGTGCCAGCGACATCCGCTGATC	GAGTCCTAAAAGCACCTGGTCGGCATC	0.25	---------{TG---(-----)---CA}---		0.00541474	18S ribosomal RNA	Brassica nigra genome assembly, chromosome: 1	{'superkingdom': 'Eukaryota', 'phylum': 'Streptophyta', 'class': 'Magnoliopsida', 'order': 'Brassicales', 'family': 'Brassicaceae', 'genus': 'Brassica', 'species': 'Brassica nigra'}	Brassica nigra
CCCGGAACCCAAAAACTTTGATTTCTC	CCCGGAACCCAAAAACTTTGATTTCTCATAAGGTGCCAGCGGAGTCCTAAAAGCAACATCCGCTGATCCCTGGTCGGCATC	CCCGGAACCCAAAAACTTTGATTTCTCGCGAGGTGCCGAGCTGGTTTGATGAATTTCTGCCAGCCCGATCCCTAGTCGGCA	2	D2	ATAAGGTGCCAGCGACATCCGCTGATC	GAGTCCTAAAAGCACCTGGTCGGCATC	0.25	gcg------{-Gagc(t-tg-)-agCc}cga		0.00541474		Brassica nigra genome assembly, chromosome: 1	{'superkingdom': 'Eukaryota', 'phylum': 'Streptophyta', 'class': 'Magnoliopsida', 'order': 'Brassicales', 'family': 'Brassicaceae', 'genus': 'Brassica', 'species': 'Brassica nigra'}	Brassica nigra
CGGTTACCCATCTAAGTACTAATCGCG	CGGTTACCCATCTAAGTACTAATCGCGCCCGATGTTGCTTAACTTCGGTGATCGGACGAGAACCGGTGTTTTCAACAGATC	CGGTTACCCATCTAAGTACTAATCGCGCCCGATGTTGCTTAACTTCAGTGATCGGACGAGAACTGGTGTTTTCAACAGATC	36	D1	CCCGATGTTGCTTAACTTCGGTGATCGG	ACGAGAACCGGTGTTTTCAACAGATC	0.288	-{-----(-------------a---)-----}		0.00541474	5S ribosomal RNA	PREDICTED: Uranotaenia lowii 5S ribosomal RNA (LOC129740736), rRNA	{'superkingdom': 'Eukaryota', 'phylum': 'Arthropoda', 'class': 'Insecta', 'order': 'Diptera', 'family': 'Culicidae', 'genus': 'Uranotaenia', 'species': 'Uranotaenia lowii'}	Uranotaenia lowii
CGGTTACCCATCTAAGTACTAATCGCG	CGGTTACCCATCTAAGTACTAATCGCGCCCGATGTTGCTTAACTTCGGTGATCGGACGAGAACCGGTGTTTTCAACAGATC	CGGTTACCCATCTAAGTACTAATCGCGCCCGATGTTGCTTAACTTCGGTGATCGGACGAGAACCGGTGTTTTCAAGATCGG	24	D1	CCCGATGTTGCTTAACTTCGGTGATCGG	ACGAGAACCGGTGTTTTCAACAGATC	0.192	-{-----(-----------------)-----}		0.00541474	5S ribosomal RNA	PREDICTED: Uranotaenia lowii 5S ribosomal RNA (LOC129740736), rRNA	{'superkingdom': 'Eukaryota', 'phylum': 'Arthropoda', 'class': 'Insecta', 'order': 'Diptera', 'family': 'Culicidae', 'genus': 'Uranotaenia', 'species': 'Uranotaenia lowii'}	Uranotaenia lowii
CGGTTACCCATCTAAGTACTAATCGCG	CGGTTACCCATCTAAGTACTAATCGCGCCCGATGTTGCTTAACTTCGGTGATCGGACGAGAACCGGTGTTTTCAACAGATC	CGGTTACCCATCTAAGTACTAATCGCGCCCGATGTTGCTTAACTTCAGTGATCGGACGAGAACTGGTGTTTTCAAGATCGG	23	D1	CCCGATGTTGCTTAACTTCGGTGATCGG	ACGAGAACCGGTGTTTTCAACAGATC	0.184	-{-----(-------------a---)-----}		0.00541474	5S ribosomal RNA	PREDICTED: Uranotaenia lowii 5S ribosomal RNA (LOC129740736), rRNA	{'superkingdom': 'Eukaryota', 'phylum': 'Arthropoda', 'class': 'Insecta', 'order': 'Diptera', 'family': 'Culicidae', 'genus': 'Uranotaenia', 'species': 'Uranotaenia lowii'}	Uranotaenia lowii
CGGTTACCCATCTAAGTACTAATCGCG	CGGTTACCCATCTAAGTACTAATCGCGCCCGATGTTGCTTAACTTCGGTGATCGGACGAGAACCGGTGTTTTCAACAGATC	CGGTTACCCATCTAAGTACTAATCGCGCCCGATGTTGCTTAACTTCAGTGATCGGACGAGAACTGGTGTTTTCAACATGGA	13	D1	CCCGATGTTGCTTAACTTCGGTGATCGG	ACGAGAACCGGTGTTTTCAACAGATC	0.104	-{-----(-------------a---)-----}		0.00541474	5S ribosomal RNA	PREDICTED: Uranotaenia lowii 5S ribosomal RNA (LOC129740736), rRNA	{'superkingdom': 'Eukaryota', 'phylum': 'Arthropoda', 'class': 'Insecta', 'order': 'Diptera', 'family': 'Culicidae', 'genus': 'Uranotaenia', 'species': 'Uranotaenia lowii'}	Uranotaenia lowii
CGGTTACCCATCTAAGTACTAATCGCG	CGGTTACCCATCTAAGTACTAATCGCGCCCGATGTTGCTTAACTTCGGTGATCGGACGAGAACCGGTGTTTTCAACAGATC	CGGTTACCCATCTAAGTACTAATCGCGCCCGATGTTGCTTAACTTCAGTGATCGGACGAGAACTGGTGTTTTCAGATCGGA	11	D1	CCCGATGTTGCTTAACTTCGGTGATCGG	ACGAGAACCGGTGTTTTCAACAGATC	0.088	-{-----(-------------a---)-----}		0.00541474	5S ribosomal RNA	PREDICTED: Uranotaenia lowii 5S ribosomal RNA (LOC129740736), rRNA	{'superkingdom': 'Eukaryota', 'phylum': 'Arthropoda', 'class': 'Insecta', 'order': 'Diptera', 'family': 'Culicidae', 'genus': 'Uranotaenia', 'species': 'Uranotaenia lowii'}	Uranotaenia lowii
CGGTTACCCATCTAAGTACTAATCGCG	CGGTTACCCATCTAAGTACTAATCGCGCCCGATGTTGCTTAACTTCGGTGATCGGACGAGAACCGGTGTTTTCAACAGATC	CGGTTACCCATCTAAGTACTAATCGCGCCCGATGTTGCTTAACTTCGGTGATCGGACGAGAACCGGTGTTTTCAAAGATCG	9	D1	CCCGATGTTGCTTAACTTCGGTGATCGG	ACGAGAACCGGTGTTTTCAACAGATC	0.072	-{-----(-----------------)-----}		0.00541474	5S ribosomal RNA	PREDICTED: Uranotaenia lowii 5S ribosomal RNA (LOC129740736), rRNA	{'superkingdom': 'Eukaryota', 'phylum': 'Arthropoda', 'class': 'Insecta', 'order': 'Diptera', 'family': 'Culicidae', 'genus': 'Uranotaenia', 'species': 'Uranotaenia lowii'}	Uranotaenia lowii
CGGTTACCCATCTAAGTACTAATCGCG	CGGTTACCCATCTAAGTACTAATCGCGCCCGATGTTGCTTAACTTCGGTGATCGGACGAGAACCGGTGTTTTCAACAGATC	CGGTTACCCATCTAAGTACTAATCGCGCCCGATGTTGCTTAACTTCGGTGATCGGACGAGAACCGGTGTTTTCAACATGGA	9	D1	CCCGATGTTGCTTAACTTCGGTGATCGG	ACGAGAACCGGTGTTTTCAACAGATC	0.072	-{-----(-----------------)-----}		0.00541474	5S ribosomal RNA	PREDICTED: Uranotaenia lowii 5S ribosomal RNA (LOC129740736), rRNA	{'superkingdom': 'Eukaryota', 'phylum': 'Arthropoda', 'class': 'Insecta', 'order': 'Diptera', 'family': 'Culicidae', 'genus': 'Uranotaenia', 'species': 'Uranotaenia lowii'}	Uranotaenia lowii
TTCATGTGTCCTGCAGTACACATTCTG	TTCATGTGTCCTGCAGTACACATTCTGACGCGCATTTAGCTGCGGTCTTCATCGATCCACGAGCCGAGTGATCCCCAGAT	TTCATGTGTCCTGCAGTACACATTCTGACGCGCATTTAGCTGCGGTCTTCATCGATCCACGAGCCGAGTGATCAGATCGGA	5	D2	ACGCGCATTTAGCTTCCACGAGCCGAG	GCGGTCTTCATCGATGATCCCCAGATC	0.227273		-------{-----()-----}--agatcgga	0.00548886	5.8S ribosomal RNA	PREDICTED: Malaya genurostris 5.8S ribosomal RNA (LOC131433328), rRNA	{'superkingdom': 'Eukaryota', 'phylum': 'Arthropoda', 'class': 'Insecta', 'order': 'Diptera', 'family': 'Culicidae', 'genus': 'Malaya', 'species': 'Malaya genurostris'}	Malaya genurostris
TTCATGTGTCCTGCAGTACACATTCTG	TTCATGTGTCCTGCAGTACACATTCTGACGCGCATTTAGCTGCGGTCTTCATCGATCCACGAGCCGAGTGATCCCCAGAT	TTCATGTGTCCTGCAGTACACATTCTGACGCGCATTTAGCTGCGGTCTTCATCGATCCACGAGCCGAGTGATCCCCTGAGA	5	D2	ACGCGCATTTAGCTTCCACGAGCCGAG	GCGGTCTTCATCGATGATCCCCAGATC	0.227273		-------{-----()-----}-----t--ga	0.00548886	5.8S ribosomal RNA	PREDICTED: Malaya genurostris 5.8S ribosomal RNA (LOC131433328), rRNA	{'superkingdom': 'Eukaryota', 'phylum': 'Arthropoda', 'class': 'Insecta', 'order': 'Diptera', 'family': 'Culicidae', 'genus': 'Malaya', 'species': 'Malaya genurostris'}	Malaya genurostris
TTCATGTGTCCTGCAGTACACATTCTG	TTCATGTGTCCTGCAGTACACATTCTGACGCGCATTTAGCTGCGGTCTTCATCGATCCACGAGCCGAGTGATCCCCAGAT	TTCATGTGTCCTGCAGTACACATTCTGACGCGCATTTAGCTGCGGTCTTCATCGATCCACGAGCCGAGTGATCCAGATCGG	4	D2	ACGCGCATTTAGCTTCCACGAGCCGAG	GCGGTCTTCATCGATGATCCCCAGATC	0.181818		-------{-----()-----}---ag-tcgg	0.00548886	5.8S ribosomal RNA	PREDICTED: Malaya genurostris 5.8S ribosomal RNA (LOC131433328), rRNA	{'superkingdom': 'Eukaryota', 'phylum': 'Arthropoda', 'class': 'Insecta', 'order': 'Diptera', 'family': 'Culicidae', 'genus': 'Malaya', 'species': 'Malaya genurostris'}	Malaya genurostris
TTCATGTGTCCTGCAGTACACATTCTG	TTCATGTGTCCTGCAGTACACATTCTGACGCGCATTTAGCTGCGGTCTTCATCGATCCACGAGCCGAGTGATCCCCAGAT	TTCATGTGTCCTGCAGTACACATTCTGACGCGCATTTAGCTGCGGTCTTCATCGATCCACGAGCCGAGTGATCCCCTAGAT	4	D2	ACGCGCATTTAGCTTCCACGAGCCGAG	GCGGTCTTCATCGATGATCCCCAGATC	0.181818		-------{-----()-----}-----tagat	0.00548886	5.8S ribosomal RNA	PREDICTED: Malaya genurostris 5.8S ribosomal RNA (LOC131433328), rRNA	{'superkingdom': 'Eukaryota', 'phylum': 'Arthropoda', 'class': 'Insecta', 'order': 'Diptera', 'family': 'Culicidae', 'genus': 'Malaya', 'species': 'Malaya genurostris'}	Malaya genurostris
TTCATGTGTCCTGCAGTACACATTCTG	TTCATGTGTCCTGCAGTACACATTCTGACGCGCATTTAGCTGCGGTCTTCATCGATCCACGAGCCGAGTGATCCCCAGAT	TTCATGTGTCCTGCAGTACACATTCTGACGCGCATTTAGCTGCGGTCTTCATCGATCCACGAGCCGAGTGATAGATCGGAA	2	D2	ACGCGCATTTAGCTTCCACGAGCCGAG	GCGGTCTTCATCGATGATCCCCAGATC	0.0909091		-------{-----()-----}-agatc-gaa	0.00548886	5.8S ribosomal RNA	PREDICTED: Malaya genurostris 5.8S ribosomal RNA (LOC131433328), rRNA	{'superkingdom': 'Eukaryota', 'phylum': 'Arthropoda', 'class': 'Insecta', 'order': 'Diptera', 'family': 'Culicidae', 'genus': 'Malaya', 'species': 'Malaya genurostris'}	Malaya genurostris
TTCATGTGTCCTGCAGTACACATTCTG	TTCATGTGTCCTGCAGTACACATTCTGACGCGCATTTAGCTGCGGTCTTCATCGATCCACGAGCCGAGTGATCCCCAGAT	TTCATGTGTCCTGCAGTACACATTCTGACGCGCATTTAGCTGCGGTCTTCATCGATCCACGAGCCGAGTGATCCCAGATCG	2	D2	ACGCGCATTTAGCTTCCACGAGCCGAG	GCGGTCTTCATCGATGATCCCCAGATC	0.0909091		-------{-----()-----}----agatcg	0.00548886	5.8S ribosomal RNA	PREDICTED: Malaya genurostris 5.8S ribosomal RNA (LOC131433328), rRNA	{'superkingdom': 'Eukaryota', 'phylum': 'Arthropoda', 'class': 'Insecta', 'order': 'Diptera', 'family': 'Culicidae', 'genus': 'Malaya', 'species': 'Malaya genurostris'}	Malaya genurostris
AGTGGAGCTGGAATTACCGAGGCTGCT	AGTGGAGCTGGAATTACCGAGGCTGCTGGCACCAGACTTGCCCTCCACTTGATCCTTGTTGAAGGATTTATGCTCAACTCA	AGTGGAGCTGGAATTACCGAGGCTGCTGGCACCAGACTTGCCCTCCACTTGATCCTTACAGAAGGATTTATGCTAGGTTCA	3	D3	GGCACCAGACTTGCTATGCTCAACTCA	CCTCCACTTGATCCTTGTTGAAGGATT	0.375		----------{------(aca-)------}-	0.00575529	18S ribosomal RNA	Aedes notoscriptus isolate MI1108 nuclear ribosomal DNA repeat unit genomic sequence	{'superkingdom': 'Eukaryota', 'phylum': 'Arthropoda', 'class': 'Insecta', 'order': 'Diptera', 'family': 'Culicidae', 'genus': 'Aedes', 'species': 'Aedes notoscriptus'}	Aedes notoscriptus
AGTGGAGCTGGAATTACCGAGGCTGCT	AGTGGAGCTGGAATTACCGAGGCTGCTGGCACCAGACTTGCCCTCCACTTGATCCTTGTTGAAGGATTTATGCTCAACTCA	AGTGGAGCTGGAATTACCGAGGCTGCTGGCACCAGACTTGCCCTCCACTTGATCCTTACCGAAGGATTTATGCTCGGTTCA	3	D3	GGCACCAGACTTGCTATGCTCAACTCA	CCTCCACTTGATCCTTGTTGAAGGATT	0.375		----------{------(acc-)------}-	0.00575529	18S ribosomal RNA	Aedes notoscriptus isolate MI1108 nuclear ribosomal DNA repeat unit genomic sequence	{'superkingdom': 'Eukaryota', 'phylum': 'Arthropoda', 'class': 'Insecta', 'order': 'Diptera', 'family': 'Culicidae', 'genus': 'Aedes', 'species': 'Aedes notoscriptus'}	Aedes notoscriptus
AGTGGAGCTGGAATTACCGAGGCTGCT	AGTGGAGCTGGAATTACCGAGGCTGCTGGCACCAGACTTGCCCTCCACTTGATCCTTGTTGAAGGATTTATGCTCAACTCA	AGTGGAGCTGGAATTACCGAGGCTGCTGGCACCAGACTTGCACTCCAATAGATCCTTACCGAAGGATTTATGCTCGGTTCA	2	D3	GGCACCAGACTTGCTATGCTCAACTCA	CCTCCACTTGATCCTTGTTGAAGGATT	0.25		a-----a-a-{------(acc-)------}-	0.00575529	18S ribosomal RNA	Aedes notoscriptus isolate MI1108 nuclear ribosomal DNA repeat unit genomic sequence	{'superkingdom': 'Eukaryota', 'phylum': 'Arthropoda', 'class': 'Insecta', 'order': 'Diptera', 'family': 'Culicidae', 'genus': 'Aedes', 'species': 'Aedes notoscriptus'}	Aedes notoscriptus
TACTTAGACATGCATGGCTTAACCTTT	TACTTAGACATGCATGGCTTAACCTTTGAGACAAGCGTATATTACTGGTAGGATCAACCAGAATTCGTCGACATTAGCGCA	TACTTAGACATGCATGGCTTAACCTTTGAGACAAGCGTATATTACTGGTAGGATCAACCAGAATTCTCGTCGTGGATAGAA	83	D3	GAGACAAGCGTATACGACATTAGCGCA	TTACTGGTAGGATCAACCAGAATTCGT	0.466292		---{-----(-------)-----}-----tc	0.00581728	18S ribosomal RNA	Culex torrentium clone torrentium2 28S ribosomal RNA gene, partial sequence; 28S-18S ribosomal RNA intergenic spacer, complete sequence; and 18S ribosomal RNA gene, partial sequence	{'superkingdom': 'Eukaryota', 'phylum': 'Arthropoda', 'class': 'Insecta', 'order': 'Diptera', 'family': 'Culicidae', 'genus': 'Culex', 'species': 'Culex torrentium'}	Culex torrentium
TACTTAGACATGCATGGCTTAACCTTT	TACTTAGACATGCATGGCTTAACCTTTGAGACAAGCGTATATTACTGGTAGGATCAACCAGAATTCGTCGACATTAGCGCA	TACTTAGACATGCATGGCTTAACCTTTGAGACAAGCGTATATTACTGGTAGGATCAACCAGAATTCTTCGACACACGATAC	40	D3	GAGACAAGCGTATACGACATTAGCGCA	TTACTGGTAGGATCAACCAGAATTCGT	0.224719		---{-----(-------)-----}-----t-	0.00581728	18S ribosomal RNA	Culex torrentium clone torrentium2 28S ribosomal RNA gene, partial sequence; 28S-18S ribosomal RNA intergenic spacer, complete sequence; and 18S ribosomal RNA gene, partial sequence	{'superkingdom': 'Eukaryota', 'phylum': 'Arthropoda', 'class': 'Insecta', 'order': 'Diptera', 'family': 'Culicidae', 'genus': 'Culex', 'species': 'Culex torrentium'}	Culex torrentium
TACTTAGACATGCATGGCTTAACCTTT	TACTTAGACATGCATGGCTTAACCTTTGAGACAAGCGTATATTACTGGTAGGATCAACCAGAATTCGTCGACATTAGCGCA	TACTTAGACATGCATGGCTTAACCTTTGAGACAAGCGTATATTACTGGTAGGATCAACCAGAATTCGTCAACATTATCACA	37	D3	GAGACAAGCGTATACGACATTAGCGCA	TTACTGGTAGGATCAACCAGAATTCGT	0.207865		---{-----(-------)-----}-------	0.00581728	18S ribosomal RNA	Culex torrentium clone torrentium2 28S ribosomal RNA gene, partial sequence; 28S-18S ribosomal RNA intergenic spacer, complete sequence; and 18S ribosomal RNA gene, partial sequence	{'superkingdom': 'Eukaryota', 'phylum': 'Arthropoda', 'class': 'Insecta', 'order': 'Diptera', 'family': 'Culicidae', 'genus': 'Culex', 'species': 'Culex torrentium'}	Culex torrentium
TACTTAGACATGCATGGCTTAACCTTT	TACTTAGACATGCATGGCTTAACCTTTGAGACAAGCGTATATTACTGGTAGGATCAACCAGAATTCGTCGACATTAGCGCA	TACTTAGACATGCATGGCTTAACCTTTGAGACAAGCGTATATTACTGGTAGGATCAACCAGAATTCGTCAGCATCGCCACA	18	D3	GAGACAAGCGTATACGACATTAGCGCA	TTACTGGTAGGATCAACCAGAATTCGT	0.101124		---{-----(-------)-----}-------	0.00581728	18S ribosomal RNA	Culex torrentium clone torrentium2 28S ribosomal RNA gene, partial sequence; 28S-18S ribosomal RNA intergenic spacer, complete sequence; and 18S ribosomal RNA gene, partial sequence	{'superkingdom': 'Eukaryota', 'phylum': 'Arthropoda', 'class': 'Insecta', 'order': 'Diptera', 'family': 'Culicidae', 'genus': 'Culex', 'species': 'Culex torrentium'}	Culex torrentium
TGTCACCCATCTAAGTACTAATCGCGC	TGTCACCCATCTAAGTACTAATCGCGCCCGATGTTGCTTAACTTCAGTGATCGGACGAGAACTGGTGTTTTCAACAGATCG	TGTCACCCATCTAAGTACTAATCGCGCCCGATGTTGCTTAACTTCGGTGATCGGACGAGAACCGGTGTTTTCAACAGATCG	60	D1	CCGATGTTGCTTAACTTCAGTGATCGGA	CGAGAACTGGTGTTTTCAACAGATCG	0.382166	{-----(-------------g---)-----}-		0.00588471	5S ribosomal RNA	PREDICTED: Aedes albopictus 5S ribosomal RNA (LOC134289303), rRNA	{'superkingdom': 'Eukaryota', 'phylum': 'Arthropoda', 'class': 'Insecta', 'order': 'Diptera', 'family': 'Culicidae', 'genus': 'Aedes', 'species': 'Aedes albopictus'}	Aedes albopictus
TGTCACCCATCTAAGTACTAATCGCGC	TGTCACCCATCTAAGTACTAATCGCGCCCGATGTTGCTTAACTTCAGTGATCGGACGAGAACTGGTGTTTTCAACAGATCG	TGTCACCCATCTAAGTACTAATCGCGCCCGATGTTGCTTAACTTCGGTGATCGGACGAGAACCGGTGTTTTCAAGATCGGA	55	D1	CCGATGTTGCTTAACTTCAGTGATCGGA	CGAGAACTGGTGTTTTCAACAGATCG	0.350318	{-----(-------------g---)-----}-		0.00588471	5S ribosomal RNA	PREDICTED: Aedes albopictus 5S ribosomal RNA (LOC134289303), rRNA	{'superkingdom': 'Eukaryota', 'phylum': 'Arthropoda', 'class': 'Insecta', 'order': 'Diptera', 'family': 'Culicidae', 'genus': 'Aedes', 'species': 'Aedes albopictus'}	Aedes albopictus
TGTCACCCATCTAAGTACTAATCGCGC	TGTCACCCATCTAAGTACTAATCGCGCCCGATGTTGCTTAACTTCAGTGATCGGACGAGAACTGGTGTTTTCAACAGATCG	TGTCACCCATCTAAGTACTAATCGCGCCCGATGTTGCTTAACTTCAGTGATCGGACGAGAACTGGTGTTTTCAGATCGGAA	25	D1	CCGATGTTGCTTAACTTCAGTGATCGGA	CGAGAACTGGTGTTTTCAACAGATCG	0.159236	{-----(-----------------)-----}-		0.00588471	5S ribosomal RNA	PREDICTED: Aedes albopictus 5S ribosomal RNA (LOC134289303), rRNA	{'superkingdom': 'Eukaryota', 'phylum': 'Arthropoda', 'class': 'Insecta', 'order': 'Diptera', 'family': 'Culicidae', 'genus': 'Aedes', 'species': 'Aedes albopictus'}	Aedes albopictus
TGTCACCCATCTAAGTACTAATCGCGC	TGTCACCCATCTAAGTACTAATCGCGCCCGATGTTGCTTAACTTCAGTGATCGGACGAGAACTGGTGTTTTCAACAGATCG	TGTCACCCATCTAAGTACTAATCGCGCCCGATGTTGCTTAACTTCGGTGATCGGACGAGAACCGGTGTTTTCAACATGGTA	17	D1	CCGATGTTGCTTAACTTCAGTGATCGGA	CGAGAACTGGTGTTTTCAACAGATCG	0.10828	{-----(-------------g---)-----}-		0.00588471	5S ribosomal RNA	PREDICTED: Aedes albopictus 5S ribosomal RNA (LOC134289303), rRNA	{'superkingdom': 'Eukaryota', 'phylum': 'Arthropoda', 'class': 'Insecta', 'order': 'Diptera', 'family': 'Culicidae', 'genus': 'Aedes', 'species': 'Aedes albopictus'}	Aedes albopictus
TGGTCACCCATCTAAGTACTAATCGCG	TGGTCACCCATCTAAGTACTAATCGCGCCCGATGTTGCTTAACTTCGGTGATCGGACGAGAACCGGTGTTTTCAACAGAT	TGGTCACCCATCTAAGTACTAATCGCGCCCGATGTTGCTTAACTTCAGTGATCGGACGAGAACTGGTGTTTTCAACAGATC	161	D1	CCCGATGTTGCTTAACTTCGGTGATCGG	ACGAGAACCGGTGTTTTCAACAGATC	0.322	-{-----(-------------a---)-----}		0.00589299	5S ribosomal RNA	PREDICTED: Uranotaenia lowii 5S ribosomal RNA (LOC129740736), rRNA	{'superkingdom': 'Eukaryota', 'phylum': 'Arthropoda', 'class': 'Insecta', 'order': 'Diptera', 'family': 'Culicidae', 'genus': 'Uranotaenia', 'species': 'Uranotaenia lowii'}	Uranotaenia lowii
TGGTCACCCATCTAAGTACTAATCGCG	TGGTCACCCATCTAAGTACTAATCGCGCCCGATGTTGCTTAACTTCGGTGATCGGACGAGAACCGGTGTTTTCAACAGAT	TGGTCACCCATCTAAGTACTAATCGCGCCCGATGTTGCTTAACTTCGGTGATCGGACGAGAACCGGTGTTTTCAAGATCGG	92	D1	CCCGATGTTGCTTAACTTCGGTGATCGG	ACGAGAACCGGTGTTTTCAACAGATC	0.184	-{-----(-----------------)-----}		0.00589299	5S ribosomal RNA	PREDICTED: Uranotaenia lowii 5S ribosomal RNA (LOC129740736), rRNA	{'superkingdom': 'Eukaryota', 'phylum': 'Arthropoda', 'class': 'Insecta', 'order': 'Diptera', 'family': 'Culicidae', 'genus': 'Uranotaenia', 'species': 'Uranotaenia lowii'}	Uranotaenia lowii
TGGTCACCCATCTAAGTACTAATCGCG	TGGTCACCCATCTAAGTACTAATCGCGCCCGATGTTGCTTAACTTCGGTGATCGGACGAGAACCGGTGTTTTCAACAGAT	TGGTCACCCATCTAAGTACTAATCGCGCCCGATGTTGCTTAACTTCAGTGATCGGACGAGAACTGGTGTTTTCAAGATCGG	88	D1	CCCGATGTTGCTTAACTTCGGTGATCGG	ACGAGAACCGGTGTTTTCAACAGATC	0.176	-{-----(-------------a---)-----}		0.00589299	5S ribosomal RNA	PREDICTED: Uranotaenia lowii 5S ribosomal RNA (LOC129740736), rRNA	{'superkingdom': 'Eukaryota', 'phylum': 'Arthropoda', 'class': 'Insecta', 'order': 'Diptera', 'family': 'Culicidae', 'genus': 'Uranotaenia', 'species': 'Uranotaenia lowii'}	Uranotaenia lowii
TGGTCACCCATCTAAGTACTAATCGCG	TGGTCACCCATCTAAGTACTAATCGCGCCCGATGTTGCTTAACTTCGGTGATCGGACGAGAACCGGTGTTTTCAACAGAT	TGGTCACCCATCTAAGTACTAATCGCGCCCGATGTTGCTTAACTTCGGTGATCGGACGAGAACCGGTGTTTTCAACATGGA	68	D1	CCCGATGTTGCTTAACTTCGGTGATCGG	ACGAGAACCGGTGTTTTCAACAGATC	0.136	-{-----(-----------------)-----}		0.00589299	5S ribosomal RNA	PREDICTED: Uranotaenia lowii 5S ribosomal RNA (LOC129740736), rRNA	{'superkingdom': 'Eukaryota', 'phylum': 'Arthropoda', 'class': 'Insecta', 'order': 'Diptera', 'family': 'Culicidae', 'genus': 'Uranotaenia', 'species': 'Uranotaenia lowii'}	Uranotaenia lowii
TGGTCACCCATCTAAGTACTAATCGCG	TGGTCACCCATCTAAGTACTAATCGCGCCCGATGTTGCTTAACTTCGGTGATCGGACGAGAACCGGTGTTTTCAACAGAT	TGGTCACCCATCTAAGTACTAATCGCGCCCGATGTTGCTTAACTTCAGTGATCGGACGAGAACTGGTGTTTTCAGATCGGA	54	D1	CCCGATGTTGCTTAACTTCGGTGATCGG	ACGAGAACCGGTGTTTTCAACAGATC	0.108	-{-----(-------------a---)-----}		0.00589299	5S ribosomal RNA	PREDICTED: Uranotaenia lowii 5S ribosomal RNA (LOC129740736), rRNA	{'superkingdom': 'Eukaryota', 'phylum': 'Arthropoda', 'class': 'Insecta', 'order': 'Diptera', 'family': 'Culicidae', 'genus': 'Uranotaenia', 'species': 'Uranotaenia lowii'}	Uranotaenia lowii
TGGTCACCCATCTAAGTACTAATCGCG	TGGTCACCCATCTAAGTACTAATCGCGCCCGATGTTGCTTAACTTCGGTGATCGGACGAGAACCGGTGTTTTCAACAGAT	TGGTCACCCATCTAAGTACTAATCGCGCCCGATGTTGCTTAACTTCGGTGATCGGACGAGAACCGGTGTTTTCAAAGATCG	37	D1	CCCGATGTTGCTTAACTTCGGTGATCGG	ACGAGAACCGGTGTTTTCAACAGATC	0.074	-{-----(-----------------)-----}		0.00589299	5S ribosomal RNA	PREDICTED: Uranotaenia lowii 5S ribosomal RNA (LOC129740736), rRNA	{'superkingdom': 'Eukaryota', 'phylum': 'Arthropoda', 'class': 'Insecta', 'order': 'Diptera', 'family': 'Culicidae', 'genus': 'Uranotaenia', 'species': 'Uranotaenia lowii'}	Uranotaenia lowii
TTAGACATGCATGGCTTAACCTTTGAG	TTAGACATGCATGGCTTAACCTTTGAGACAAGCGTATATTACTGGTAGGATCAACCAGAATTCGTCGACATTAGCGCACAC	TTAGACATGCATGGCTTAACCTTTGAGACAAGCGTATATTACTGGTAGGATCAACCAGAATTCGTCAACATTAGCGCACGC	54	D3	ACAAGCGTATATTACATTAGCGCACAC	CTGGTAGGATCAACCAGAATTCGTCGA	0.519231		{-----(-------)-----}--------a-	0.00589299	18S ribosomal RNA	Culex torrentium clone torrentium2 28S ribosomal RNA gene, partial sequence; 28S-18S ribosomal RNA intergenic spacer, complete sequence; and 18S ribosomal RNA gene, partial sequence	{'superkingdom': 'Eukaryota', 'phylum': 'Arthropoda', 'class': 'Insecta', 'order': 'Diptera', 'family': 'Culicidae', 'genus': 'Culex', 'species': 'Culex torrentium'}	Culex torrentium
TTAGACATGCATGGCTTAACCTTTGAG	TTAGACATGCATGGCTTAACCTTTGAGACAAGCGTATATTACTGGTAGGATCAACCAGAATTCGTCGACATTAGCGCACAC	TTAGACATGCATGGCTTAACCTTTGAGACAAGCGTATATTACTGGTAGGATCAACCAGAATTCTCGTCGTGGATAGAACAA	30	D3	ACAAGCGTATATTACATTAGCGCACAC	CTGGTAGGATCAACCAGAATTCGTCGA	0.288462		{-----(-------)-----}-----tcgtc	0.00589299	18S ribosomal RNA	Culex torrentium clone torrentium2 28S ribosomal RNA gene, partial sequence; 28S-18S ribosomal RNA intergenic spacer, complete sequence; and 18S ribosomal RNA gene, partial sequence	{'superkingdom': 'Eukaryota', 'phylum': 'Arthropoda', 'class': 'Insecta', 'order': 'Diptera', 'family': 'Culicidae', 'genus': 'Culex', 'species': 'Culex torrentium'}	Culex torrentium
TTAGACATGCATGGCTTAACCTTTGAG	TTAGACATGCATGGCTTAACCTTTGAGACAAGCGTATATTACTGGTAGGATCAACCAGAATTCGTCGACATTAGCGCACAC	TTAGACATGCATGGCTTAACCTTTGAGACAAGCGTATATTACTGGTAGGATCAACCAGAATTCTTCGACACACGATACGAC	20	D3	ACAAGCGTATATTACATTAGCGCACAC	CTGGTAGGATCAACCAGAATTCGTCGA	0.192308		{-----(-------)-----}-----t----	0.00589299	18S ribosomal RNA	Culex torrentium clone torrentium2 28S ribosomal RNA gene, partial sequence; 28S-18S ribosomal RNA intergenic spacer, complete sequence; and 18S ribosomal RNA gene, partial sequence	{'superkingdom': 'Eukaryota', 'phylum': 'Arthropoda', 'class': 'Insecta', 'order': 'Diptera', 'family': 'Culicidae', 'genus': 'Culex', 'species': 'Culex torrentium'}	Culex torrentium
TTCATGTGACCTGCAGTTCACATTCTG	TTCATGTGACCTGCAGTTCACATTCTGACGCGCATTTAGCTGCGGTCTTCATCGATCCACGAGCCGAGTGATCCCCTGAGA	TTCATGTGACCTGCAGTTCACATTCTGACGCGCATTTAGCTGCGGTCTTCATCGATCCACGAGCCGAGTGATCCAGATCGG	7	D2	ACGCGCATTTAGCTTCCACGAGCCGAG	GCGGTCTTCATCGATGATCCCCTGAGA	0.318182		-------{-----()-----}---agatc-g	0.00599122	5.8S ribosomal RNA	PREDICTED: Malaya genurostris 5.8S ribosomal RNA (LOC131433328), rRNA	{'superkingdom': 'Eukaryota', 'phylum': 'Arthropoda', 'class': 'Insecta', 'order': 'Diptera', 'family': 'Culicidae', 'genus': 'Malaya', 'species': 'Malaya genurostris'}	Malaya genurostris
TTCATGTGACCTGCAGTTCACATTCTG	TTCATGTGACCTGCAGTTCACATTCTGACGCGCATTTAGCTGCGGTCTTCATCGATCCACGAGCCGAGTGATCCCCTGAGA	TTCATGTGACCTGCAGTTCACATTCTGACGCGCATTTAGCTGCGGTCTTCATCGATCCACGAGCCGAGTGATCCCCAGATC	7	D2	ACGCGCATTTAGCTTCCACGAGCCGAG	GCGGTCTTCATCGATGATCCCCTGAGA	0.318182		-------{-----()-----}-----a--tc	0.00599122	5.8S ribosomal RNA	PREDICTED: Malaya genurostris 5.8S ribosomal RNA (LOC131433328), rRNA	{'superkingdom': 'Eukaryota', 'phylum': 'Arthropoda', 'class': 'Insecta', 'order': 'Diptera', 'family': 'Culicidae', 'genus': 'Malaya', 'species': 'Malaya genurostris'}	Malaya genurostris
TTCATGTGACCTGCAGTTCACATTCTG	TTCATGTGACCTGCAGTTCACATTCTGACGCGCATTTAGCTGCGGTCTTCATCGATCCACGAGCCGAGTGATCCCCTGAGA	TTCATGTGACCTGCAGTTCACATTCTGACGCGCATTTAGCTGCGGTCTTCATCGATCCACGAGCCGAGTGATCAGATCGGA	4	D2	ACGCGCATTTAGCTTCCACGAGCCGAG	GCGGTCTTCATCGATGATCCCCTGAGA	0.181818		-------{-----()-----}--aga-cg--	0.00599122	5.8S ribosomal RNA	PREDICTED: Malaya genurostris 5.8S ribosomal RNA (LOC131433328), rRNA	{'superkingdom': 'Eukaryota', 'phylum': 'Arthropoda', 'class': 'Insecta', 'order': 'Diptera', 'family': 'Culicidae', 'genus': 'Malaya', 'species': 'Malaya genurostris'}	Malaya genurostris
TTCATGTGACCTGCAGTTCACATTCTG	TTCATGTGACCTGCAGTTCACATTCTGACGCGCATTTAGCTGCGGTCTTCATCGATCCACGAGCCGAGTGATCCCCTGAGA	TTCATGTGACCTGCAGTTCACATTCTGACGCGCATTTAGCTGCGGTCTTCATCGATCCACGAGCCGAGTGATCCCAGATCG	4	D2	ACGCGCATTTAGCTTCCACGAGCCGAG	GCGGTCTTCATCGATGATCCCCTGAGA	0.181818		-------{-----()-----}----agatcg	0.00599122	5.8S ribosomal RNA	PREDICTED: Malaya genurostris 5.8S ribosomal RNA (LOC131433328), rRNA	{'superkingdom': 'Eukaryota', 'phylum': 'Arthropoda', 'class': 'Insecta', 'order': 'Diptera', 'family': 'Culicidae', 'genus': 'Malaya', 'species': 'Malaya genurostris'}	Malaya genurostris
CGGTCACTCATCTAAGTACTAATCGCG	CGGTCACTCATCTAAGTACTAATCGCGCCCGATGTTGCTTAACTTCGGTGATCGGACGAGAACCGGTGTTTTCAAGATCGG	CGGTCACTCATCTAAGTACTAATCGCGCCCGATGTTGCTTAACTTCAGTGATCGGACGAGAACTGGTGTTTTCAAGATCGG	4	D1	CCCGATGTTGCTTAACTTCGGTGATCGG	ACGAGAACCGGTGTTTTCAAGATCGG	0.266667	-{-----(-------------a---)-----}		0.00608753	5S ribosomal RNA	PREDICTED: Topomyia yanbarensis 5S ribosomal RNA (LOC131686358), rRNA	{'superkingdom': 'Eukaryota', 'phylum': 'Arthropoda', 'class': 'Insecta', 'order': 'Diptera', 'family': 'Culicidae', 'genus': 'Topomyia', 'species': 'Topomyia yanbarensis'}	Topomyia yanbarensis
CGGTCACTCATCTAAGTACTAATCGCG	CGGTCACTCATCTAAGTACTAATCGCGCCCGATGTTGCTTAACTTCGGTGATCGGACGAGAACCGGTGTTTTCAAGATCGG	CGGTCACTCATCTAAGTACTAATCGCGCCCGATGTTGCTTAACTTCGGTGATCGGACGAGAACCGGTGTTTTCAACAGATC	3	D1	CCCGATGTTGCTTAACTTCGGTGATCGG	ACGAGAACCGGTGTTTTCAAGATCGG	0.2	-{-----(-----------------)-----}		0.00608753	5S ribosomal RNA	PREDICTED: Topomyia yanbarensis 5S ribosomal RNA (LOC131686358), rRNA	{'superkingdom': 'Eukaryota', 'phylum': 'Arthropoda', 'class': 'Insecta', 'order': 'Diptera', 'family': 'Culicidae', 'genus': 'Topomyia', 'species': 'Topomyia yanbarensis'}	Topomyia yanbarensis
CGGTCACTCATCTAAGTACTAATCGCG	CGGTCACTCATCTAAGTACTAATCGCGCCCGATGTTGCTTAACTTCGGTGATCGGACGAGAACCGGTGTTTTCAAGATCGG	CGGTCACTCATCTAAGTACTAATCGCGCCCGATGTTGCTTAACTTCAGTGATCGGACGAGAACTGGTGTTTTCAACATGGA	2	D1	CCCGATGTTGCTTAACTTCGGTGATCGG	ACGAGAACCGGTGTTTTCAAGATCGG	0.133333	-{-----(-------------a---)-----}		0.00608753	5S ribosomal RNA	PREDICTED: Topomyia yanbarensis 5S ribosomal RNA (LOC131686358), rRNA	{'superkingdom': 'Eukaryota', 'phylum': 'Arthropoda', 'class': 'Insecta', 'order': 'Diptera', 'family': 'Culicidae', 'genus': 'Topomyia', 'species': 'Topomyia yanbarensis'}	Topomyia yanbarensis
CGGTCACTCATCTAAGTACTAATCGCG	CGGTCACTCATCTAAGTACTAATCGCGCCCGATGTTGCTTAACTTCGGTGATCGGACGAGAACCGGTGTTTTCAAGATCGG	CGGTCACTCATCTAAGTACTAATCGCGCCCGATGTTGCTTAACTTCAGTGATCGGACGAGAACTGGTGTTTTCAGATCGGA	2	D1	CCCGATGTTGCTTAACTTCGGTGATCGG	ACGAGAACCGGTGTTTTCAAGATCGG	0.133333	-{-----(-------------a---)-----}		0.00608753	5S ribosomal RNA	PREDICTED: Topomyia yanbarensis 5S ribosomal RNA (LOC131686358), rRNA	{'superkingdom': 'Eukaryota', 'phylum': 'Arthropoda', 'class': 'Insecta', 'order': 'Diptera', 'family': 'Culicidae', 'genus': 'Topomyia', 'species': 'Topomyia yanbarensis'}	Topomyia yanbarensis
CGGTCACTCATCTAAGTACTAATCGCG	CGGTCACTCATCTAAGTACTAATCGCGCCCGATGTTGCTTAACTTCGGTGATCGGACGAGAACCGGTGTTTTCAAGATCGG	CGGTCACTCATCTAAGTACTAATCGCGCCCGATGTTGCTTAACTTCGGTGATCGGACGAGAACCGGTGTTTTCAACATGGA	2	D1	CCCGATGTTGCTTAACTTCGGTGATCGG	ACGAGAACCGGTGTTTTCAAGATCGG	0.133333	-{-----(-----------------)-----}		0.00608753	5S ribosomal RNA	PREDICTED: Topomyia yanbarensis 5S ribosomal RNA (LOC131686358), rRNA	{'superkingdom': 'Eukaryota', 'phylum': 'Arthropoda', 'class': 'Insecta', 'order': 'Diptera', 'family': 'Culicidae', 'genus': 'Topomyia', 'species': 'Topomyia yanbarensis'}	Topomyia yanbarensis
CGGTCACTCATCTAAGTACTAATCGCG	CGGTCACTCATCTAAGTACTAATCGCGCCCGATGTTGCTTAACTTCGGTGATCGGACGAGAACCGGTGTTTTCAAGATCGG	CGGTCACTCATCTAAGTACTAATCGCGCCCGATGTTGCTTAACTTCAGTGATCGGACGAGAACTGGTGTTTTAGATCGGAA	1	D1	CCCGATGTTGCTTAACTTCGGTGATCGG	ACGAGAACCGGTGTTTTCAAGATCGG	0.0666667	-{-----(-------------a---)-----}		0.00608753	5S ribosomal RNA	PREDICTED: Topomyia yanbarensis 5S ribosomal RNA (LOC131686358), rRNA	{'superkingdom': 'Eukaryota', 'phylum': 'Arthropoda', 'class': 'Insecta', 'order': 'Diptera', 'family': 'Culicidae', 'genus': 'Topomyia', 'species': 'Topomyia yanbarensis'}	Topomyia yanbarensis
CGGTCACTCATCTAAGTACTAATCGCG	CGGTCACTCATCTAAGTACTAATCGCGCCCGATGTTGCTTAACTTCGGTGATCGGACGAGAACCGGTGTTTTCAAGATCGG	CGGTCACTCATCTAAGTACTAATCGCGCCCGATGTTGCTTAACTTCGGTGATCGGACGAGAACCGGTGTTTTAGATCGGAA	1	D1	CCCGATGTTGCTTAACTTCGGTGATCGG	ACGAGAACCGGTGTTTTCAAGATCGG	0.0666667	-{-----(-----------------)-----}		0.00608753	5S ribosomal RNA	PREDICTED: Topomyia yanbarensis 5S ribosomal RNA (LOC131686358), rRNA	{'superkingdom': 'Eukaryota', 'phylum': 'Arthropoda', 'class': 'Insecta', 'order': 'Diptera', 'family': 'Culicidae', 'genus': 'Topomyia', 'species': 'Topomyia yanbarensis'}	Topomyia yanbarensis
CGGTCGCCCATCTAAGTACTAATCGCG	CGGTCGCCCATCTAAGTACTAATCGCGCCCGATGTTGCTTAACTTCAGTGATCGGACGAGAACTGGTGTTTTCAACAGAT	CGGTCGCCCATCTAAGTACTAATCGCGCCCGATGTTGCTTAACTTCGGTGATCGGACGAGAACCGGTGTTTTCAACAGATC	109	D1	CCCGATGTTGCTTAACTTCAGTGATCGG	ACGAGAACTGGTGTTTTCAACAGATC	0.307042	-{-----(-------------g---)-----}		0.00643762	5S ribosomal RNA	PREDICTED: Aedes albopictus 5S ribosomal RNA (LOC134289303), rRNA	{'superkingdom': 'Eukaryota', 'phylum': 'Arthropoda', 'class': 'Insecta', 'order': 'Diptera', 'family': 'Culicidae', 'genus': 'Aedes', 'species': 'Aedes albopictus'}	Aedes albopictus
CGGTCGCCCATCTAAGTACTAATCGCG	CGGTCGCCCATCTAAGTACTAATCGCGCCCGATGTTGCTTAACTTCAGTGATCGGACGAGAACTGGTGTTTTCAACAGAT	CGGTCGCCCATCTAAGTACTAATCGCGCCCGATGTTGCTTAACTTCAGTGATCGGACGAGAACTGGTGTTTTCAAGATCGG	71	D1	CCCGATGTTGCTTAACTTCAGTGATCGG	ACGAGAACTGGTGTTTTCAACAGATC	0.2	-{-----(-----------------)-----}		0.00643762	5S ribosomal RNA	PREDICTED: Aedes albopictus 5S ribosomal RNA (LOC134289303), rRNA	{'superkingdom': 'Eukaryota', 'phylum': 'Arthropoda', 'class': 'Insecta', 'order': 'Diptera', 'family': 'Culicidae', 'genus': 'Aedes', 'species': 'Aedes albopictus'}	Aedes albopictus
CGGTCGCCCATCTAAGTACTAATCGCG	CGGTCGCCCATCTAAGTACTAATCGCGCCCGATGTTGCTTAACTTCAGTGATCGGACGAGAACTGGTGTTTTCAACAGAT	CGGTCGCCCATCTAAGTACTAATCGCGCCCGATGTTGCTTAACTTCGGTGATCGGACGAGAACCGGTGTTTTCAAGATCGG	52	D1	CCCGATGTTGCTTAACTTCAGTGATCGG	ACGAGAACTGGTGTTTTCAACAGATC	0.146479	-{-----(-------------g---)-----}		0.00643762	5S ribosomal RNA	PREDICTED: Aedes albopictus 5S ribosomal RNA (LOC134289303), rRNA	{'superkingdom': 'Eukaryota', 'phylum': 'Arthropoda', 'class': 'Insecta', 'order': 'Diptera', 'family': 'Culicidae', 'genus': 'Aedes', 'species': 'Aedes albopictus'}	Aedes albopictus
CGGTCGCCCATCTAAGTACTAATCGCG	CGGTCGCCCATCTAAGTACTAATCGCGCCCGATGTTGCTTAACTTCAGTGATCGGACGAGAACTGGTGTTTTCAACAGAT	CGGTCGCCCATCTAAGTACTAATCGCGCCCGATGTTGCTTAACTTCAGTGATCGGACGAGAACTGGTGTTTTCAGATCGGA	37	D1	CCCGATGTTGCTTAACTTCAGTGATCGG	ACGAGAACTGGTGTTTTCAACAGATC	0.104225	-{-----(-----------------)-----}		0.00643762	5S ribosomal RNA	PREDICTED: Aedes albopictus 5S ribosomal RNA (LOC134289303), rRNA	{'superkingdom': 'Eukaryota', 'phylum': 'Arthropoda', 'class': 'Insecta', 'order': 'Diptera', 'family': 'Culicidae', 'genus': 'Aedes', 'species': 'Aedes albopictus'}	Aedes albopictus
CGGTCGCCCATCTAAGTACTAATCGCG	CGGTCGCCCATCTAAGTACTAATCGCGCCCGATGTTGCTTAACTTCAGTGATCGGACGAGAACTGGTGTTTTCAACAGAT	CGGTCGCCCATCTAAGTACTAATCGCGCCCGATGTTGCTTAACTTCAGTGATCGGACGAGAACTGGTGTTTTCAACATGGA	31	D1	CCCGATGTTGCTTAACTTCAGTGATCGG	ACGAGAACTGGTGTTTTCAACAGATC	0.0873239	-{-----(-----------------)-----}		0.00643762	5S ribosomal RNA	PREDICTED: Aedes albopictus 5S ribosomal RNA (LOC134289303), rRNA	{'superkingdom': 'Eukaryota', 'phylum': 'Arthropoda', 'class': 'Insecta', 'order': 'Diptera', 'family': 'Culicidae', 'genus': 'Aedes', 'species': 'Aedes albopictus'}	Aedes albopictus
CGGTCGCCCATCTAAGTACTAATCGCG	CGGTCGCCCATCTAAGTACTAATCGCGCCCGATGTTGCTTAACTTCAGTGATCGGACGAGAACTGGTGTTTTCAACAGAT	CGGTCGCCCATCTAAGTACTAATCGCGCCCGATGTTGCTTAACTTCGGTGATCGGACGAGAACCGGTGTTTTCAAAGATCG	28	D1	CCCGATGTTGCTTAACTTCAGTGATCGG	ACGAGAACTGGTGTTTTCAACAGATC	0.0788732	-{-----(-------------g---)-----}		0.00643762	5S ribosomal RNA	PREDICTED: Aedes albopictus 5S ribosomal RNA (LOC134289303), rRNA	{'superkingdom': 'Eukaryota', 'phylum': 'Arthropoda', 'class': 'Insecta', 'order': 'Diptera', 'family': 'Culicidae', 'genus': 'Aedes', 'species': 'Aedes albopictus'}	Aedes albopictus
CGGTCGCCCATCTAAGTACTAATCGCG	CGGTCGCCCATCTAAGTACTAATCGCGCCCGATGTTGCTTAACTTCAGTGATCGGACGAGAACTGGTGTTTTCAACAGAT	CGGTCGCCCATCTAAGTACTAATCGCGCCCGATGTTGCTTAACTTCGGTGATCGGACGAGAACCGGTGTTTTCAACATGGA	27	D1	CCCGATGTTGCTTAACTTCAGTGATCGG	ACGAGAACTGGTGTTTTCAACAGATC	0.0760563	-{-----(-------------g---)-----}		0.00643762	5S ribosomal RNA	PREDICTED: Aedes albopictus 5S ribosomal RNA (LOC134289303), rRNA	{'superkingdom': 'Eukaryota', 'phylum': 'Arthropoda', 'class': 'Insecta', 'order': 'Diptera', 'family': 'Culicidae', 'genus': 'Aedes', 'species': 'Aedes albopictus'}	Aedes albopictus
CAGTCACCCATCTAAGTACTAATCGCG	CAGTCACCCATCTAAGTACTAATCGCGCCCGATGTTGCTTAACTTCGGTGATCGGACGAGAACCGGTGTTTTCAACAGATC	CAGTCACCCATCTAAGTACTAATCGCGCCCGATGTTGCTTAACTTCAGTGATCGGACGAGAACTGGTGTTTTCAAGATCGG	3	D1	CCCGATGTTGCTTAACTTCGGTGATCGG	ACGAGAACCGGTGTTTTCAACAGATC	0.25	-{-----(-------------a---)-----}		0.00644863	5S ribosomal RNA	PREDICTED: Uranotaenia lowii 5S ribosomal RNA (LOC129740736), rRNA	{'superkingdom': 'Eukaryota', 'phylum': 'Arthropoda', 'class': 'Insecta', 'order': 'Diptera', 'family': 'Culicidae', 'genus': 'Uranotaenia', 'species': 'Uranotaenia lowii'}	Uranotaenia lowii
CAGTCACCCATCTAAGTACTAATCGCG	CAGTCACCCATCTAAGTACTAATCGCGCCCGATGTTGCTTAACTTCGGTGATCGGACGAGAACCGGTGTTTTCAACAGATC	CAGTCACCCATCTAAGTACTAATCGCGCCCGATGTTGCTTAACTTCAGTGATCGGACGAGAACTGGTGTTTTCAACATGGA	2	D1	CCCGATGTTGCTTAACTTCGGTGATCGG	ACGAGAACCGGTGTTTTCAACAGATC	0.166667	-{-----(-------------a---)-----}		0.00644863	5S ribosomal RNA	PREDICTED: Uranotaenia lowii 5S ribosomal RNA (LOC129740736), rRNA	{'superkingdom': 'Eukaryota', 'phylum': 'Arthropoda', 'class': 'Insecta', 'order': 'Diptera', 'family': 'Culicidae', 'genus': 'Uranotaenia', 'species': 'Uranotaenia lowii'}	Uranotaenia lowii
CAGTCACCCATCTAAGTACTAATCGCG	CAGTCACCCATCTAAGTACTAATCGCGCCCGATGTTGCTTAACTTCGGTGATCGGACGAGAACCGGTGTTTTCAACAGATC	CAGTCACCCATCTAAGTACTAATCGCGCCCGATGTTGCTTAACTTCGGTGATCGGACGAGAACCGGTGTTTTCAACATAGA	2	D1	CCCGATGTTGCTTAACTTCGGTGATCGG	ACGAGAACCGGTGTTTTCAACAGATC	0.166667	-{-----(-----------------)-----}		0.00644863	5S ribosomal RNA	PREDICTED: Uranotaenia lowii 5S ribosomal RNA (LOC129740736), rRNA	{'superkingdom': 'Eukaryota', 'phylum': 'Arthropoda', 'class': 'Insecta', 'order': 'Diptera', 'family': 'Culicidae', 'genus': 'Uranotaenia', 'species': 'Uranotaenia lowii'}	Uranotaenia lowii
CAGTCACCCATCTAAGTACTAATCGCG	CAGTCACCCATCTAAGTACTAATCGCGCCCGATGTTGCTTAACTTCGGTGATCGGACGAGAACCGGTGTTTTCAACAGATC	CAGTCACCCATCTAAGTACTAATCGCGCCCGATGTTGCTTAACTTCGGTGATCGGACGAGAACCGGTGTTTTCAACATGAG	2	D1	CCCGATGTTGCTTAACTTCGGTGATCGG	ACGAGAACCGGTGTTTTCAACAGATC	0.166667	-{-----(-----------------)-----}		0.00644863	5S ribosomal RNA	PREDICTED: Uranotaenia lowii 5S ribosomal RNA (LOC129740736), rRNA	{'superkingdom': 'Eukaryota', 'phylum': 'Arthropoda', 'class': 'Insecta', 'order': 'Diptera', 'family': 'Culicidae', 'genus': 'Uranotaenia', 'species': 'Uranotaenia lowii'}	Uranotaenia lowii
CAGTCACCCATCTAAGTACTAATCGCG	CAGTCACCCATCTAAGTACTAATCGCGCCCGATGTTGCTTAACTTCGGTGATCGGACGAGAACCGGTGTTTTCAACAGATC	CAGTCACCCATCTAAGTACTAATCGCGCCCGATGTTGCTTAACTTCGGTGATCGGACGAGAACCGGTGTTTTCAACATGGT	2	D1	CCCGATGTTGCTTAACTTCGGTGATCGG	ACGAGAACCGGTGTTTTCAACAGATC	0.166667	-{-----(-----------------)-----}		0.00644863	5S ribosomal RNA	PREDICTED: Uranotaenia lowii 5S ribosomal RNA (LOC129740736), rRNA	{'superkingdom': 'Eukaryota', 'phylum': 'Arthropoda', 'class': 'Insecta', 'order': 'Diptera', 'family': 'Culicidae', 'genus': 'Uranotaenia', 'species': 'Uranotaenia lowii'}	Uranotaenia lowii
CAGTCACCCATCTAAGTACTAATCGCG	CAGTCACCCATCTAAGTACTAATCGCGCCCGATGTTGCTTAACTTCGGTGATCGGACGAGAACCGGTGTTTTCAACAGATC	CAGTCACCCATCTAAGTACTAATCGCGCCCGATGTTGCTTAACTTCAGTGATCGGACGAGAACTGGTGTTTTCAGATCGGA	1	D1	CCCGATGTTGCTTAACTTCGGTGATCGG	ACGAGAACCGGTGTTTTCAACAGATC	0.0833333	-{-----(-------------a---)-----}		0.00644863	5S ribosomal RNA	PREDICTED: Uranotaenia lowii 5S ribosomal RNA (LOC129740736), rRNA	{'superkingdom': 'Eukaryota', 'phylum': 'Arthropoda', 'class': 'Insecta', 'order': 'Diptera', 'family': 'Culicidae', 'genus': 'Uranotaenia', 'species': 'Uranotaenia lowii'}	Uranotaenia lowii
TCATTTGTCCTGCAGTTCACATTCTGA	TCATTTGTCCTGCAGTTCACATTCTGACGCGCATTTAGCTGCGGTCTTCATCGATCCACGAGCCGAGTGATCCCCAGATCG	TCATTTGTCCTGCAGTTCACATTCTGACGCGCATTTAGCTGCGGTCTTCATCGATCCACGAGCCGAGTGATCCAGATCGGA	47	D2	CGCGCATTTAGCTGCCACGAGCCGAGT	CGGTCTTCATCGATGATCCCCAGATCG	0.239796		------{-----()-----}---ag-tcgga	0.00659906	5.8S ribosomal RNA	PREDICTED: Malaya genurostris 5.8S ribosomal RNA (LOC131433328), rRNA	{'superkingdom': 'Eukaryota', 'phylum': 'Arthropoda', 'class': 'Insecta', 'order': 'Diptera', 'family': 'Culicidae', 'genus': 'Malaya', 'species': 'Malaya genurostris'}	Malaya genurostris
TCATTTGTCCTGCAGTTCACATTCTGA	TCATTTGTCCTGCAGTTCACATTCTGACGCGCATTTAGCTGCGGTCTTCATCGATCCACGAGCCGAGTGATCCCCAGATCG	TCATTTGTCCTGCAGTTCACATTCTGACGCGCATTTAGCTGCGGTCTTCATCGATCCACGAGCCGAGTGATCCCCTGAGAT	40	D2	CGCGCATTTAGCTGCCACGAGCCGAGT	CGGTCTTCATCGATGATCCCCAGATCG	0.204082		------{-----()-----}-----t--gat	0.00659906	5.8S ribosomal RNA	PREDICTED: Malaya genurostris 5.8S ribosomal RNA (LOC131433328), rRNA	{'superkingdom': 'Eukaryota', 'phylum': 'Arthropoda', 'class': 'Insecta', 'order': 'Diptera', 'family': 'Culicidae', 'genus': 'Malaya', 'species': 'Malaya genurostris'}	Malaya genurostris
TCATTTGTCCTGCAGTTCACATTCTGA	TCATTTGTCCTGCAGTTCACATTCTGACGCGCATTTAGCTGCGGTCTTCATCGATCCACGAGCCGAGTGATCCCCAGATCG	TCATTTGTCCTGCAGTTCACATTCTGACGCGCATTTAGCTGCGGTCTTCATCGATCCACGAGCCGAGTGATCCCAGATCGG	34	D2	CGCGCATTTAGCTGCCACGAGCCGAGT	CGGTCTTCATCGATGATCCCCAGATCG	0.173469		------{-----()-----}----agatcg-	0.00659906	5.8S ribosomal RNA	PREDICTED: Malaya genurostris 5.8S ribosomal RNA (LOC131433328), rRNA	{'superkingdom': 'Eukaryota', 'phylum': 'Arthropoda', 'class': 'Insecta', 'order': 'Diptera', 'family': 'Culicidae', 'genus': 'Malaya', 'species': 'Malaya genurostris'}	Malaya genurostris
TCATTTGTCCTGCAGTTCACATTCTGA	TCATTTGTCCTGCAGTTCACATTCTGACGCGCATTTAGCTGCGGTCTTCATCGATCCACGAGCCGAGTGATCCCCAGATCG	TCATTTGTCCTGCAGTTCACATTCTGACGCGCATTTAGCTGCGGTCTTCATCGATCCACGAGCCGAGTGATCAGATCGGAA	33	D2	CGCGCATTTAGCTGCCACGAGCCGAGT	CGGTCTTCATCGATGATCCCCAGATCG	0.168367		------{-----()-----}--agatcggaa	0.00659906	5.8S ribosomal RNA	PREDICTED: Malaya genurostris 5.8S ribosomal RNA (LOC131433328), rRNA	{'superkingdom': 'Eukaryota', 'phylum': 'Arthropoda', 'class': 'Insecta', 'order': 'Diptera', 'family': 'Culicidae', 'genus': 'Malaya', 'species': 'Malaya genurostris'}	Malaya genurostris
TCATTTGTCCTGCAGTTCACATTCTGA	TCATTTGTCCTGCAGTTCACATTCTGACGCGCATTTAGCTGCGGTCTTCATCGATCCACGAGCCGAGTGATCCCCAGATCG	TCATTTGTCCTGCAGTTCACATTCTGACGCGCATTTAGCTGCGGTCTTCATCGATCCACGAGCCGAGTGATCCCCTAGATC	27	D2	CGCGCATTTAGCTGCCACGAGCCGAGT	CGGTCTTCATCGATGATCCCCAGATCG	0.137755		------{-----()-----}-----tagatc	0.00659906	5.8S ribosomal RNA	PREDICTED: Malaya genurostris 5.8S ribosomal RNA (LOC131433328), rRNA	{'superkingdom': 'Eukaryota', 'phylum': 'Arthropoda', 'class': 'Insecta', 'order': 'Diptera', 'family': 'Culicidae', 'genus': 'Malaya', 'species': 'Malaya genurostris'}	Malaya genurostris
TCATTTGTCCTGCAGTTCACATTCTGA	TCATTTGTCCTGCAGTTCACATTCTGACGCGCATTTAGCTGCGGTCTTCATCGATCCACGAGCCGAGTGATCCCCAGATCG	TCATTTGTCCTGCAGTTCACATTCTGACGCGCATTTAGCTGCGGTCTTCATCGATCCACGAGCCGAGTGATCCCCTGCCTA	15	D2	CGCGCATTTAGCTGCCACGAGCCGAGT	CGGTCTTCATCGATGATCCCCAGATCG	0.0765306		------{-----()-----}-----t-ccta	0.00659906	5.8S ribosomal RNA	PREDICTED: Malaya genurostris 5.8S ribosomal RNA (LOC131433328), rRNA	{'superkingdom': 'Eukaryota', 'phylum': 'Arthropoda', 'class': 'Insecta', 'order': 'Diptera', 'family': 'Culicidae', 'genus': 'Malaya', 'species': 'Malaya genurostris'}	Malaya genurostris
TTCATGTGTCCTGCAGTTCACAGTCTG	TTCATGTGTCCTGCAGTTCACAGTCTGACGCGCATTTAGCTGCGGTCTTCATCGATCCACGAGCCGAGTGATCCCCAGATC	TTCATGTGTCCTGCAGTTCACAGTCTGACGCGCATTTAGCTGCGGTCTTCATCGATCCACGAGCCGAGTGATCCCCTGCCT	10	D2	ACGCGCATTTAGCTTCCACGAGCCGAG	GCGGTCTTCATCGATGATCCCCAGATC	0.263158		-------{-----()-----}-----t-cct	0.00680183	5.8S ribosomal RNA	PREDICTED: Malaya genurostris 5.8S ribosomal RNA (LOC131433328), rRNA	{'superkingdom': 'Eukaryota', 'phylum': 'Arthropoda', 'class': 'Insecta', 'order': 'Diptera', 'family': 'Culicidae', 'genus': 'Malaya', 'species': 'Malaya genurostris'}	Malaya genurostris
TTCATGTGTCCTGCAGTTCACAGTCTG	TTCATGTGTCCTGCAGTTCACAGTCTGACGCGCATTTAGCTGCGGTCTTCATCGATCCACGAGCCGAGTGATCCCCAGATC	TTCATGTGTCCTGCAGTTCACAGTCTGACGCGCATTTAGCTGCGGTCTTCATCGATCCACGAGCCGAGTGATCCCAGATCG	7	D2	ACGCGCATTTAGCTTCCACGAGCCGAG	GCGGTCTTCATCGATGATCCCCAGATC	0.184211		-------{-----()-----}----agatcg	0.00680183	5.8S ribosomal RNA	PREDICTED: Malaya genurostris 5.8S ribosomal RNA (LOC131433328), rRNA	{'superkingdom': 'Eukaryota', 'phylum': 'Arthropoda', 'class': 'Insecta', 'order': 'Diptera', 'family': 'Culicidae', 'genus': 'Malaya', 'species': 'Malaya genurostris'}	Malaya genurostris
TTCATGTGTCCTGCAGTTCACAGTCTG	TTCATGTGTCCTGCAGTTCACAGTCTGACGCGCATTTAGCTGCGGTCTTCATCGATCCACGAGCCGAGTGATCCCCAGATC	TTCATGTGTCCTGCAGTTCACAGTCTGACGCGCATTTAGCTGCGGTCTTCATCGATCCACGAGCCGAGTGATCCAGATCGG	6	D2	ACGCGCATTTAGCTTCCACGAGCCGAG	GCGGTCTTCATCGATGATCCCCAGATC	0.157895		-------{-----()-----}---ag-tcgg	0.00680183	5.8S ribosomal RNA	PREDICTED: Malaya genurostris 5.8S ribosomal RNA (LOC131433328), rRNA	{'superkingdom': 'Eukaryota', 'phylum': 'Arthropoda', 'class': 'Insecta', 'order': 'Diptera', 'family': 'Culicidae', 'genus': 'Malaya', 'species': 'Malaya genurostris'}	Malaya genurostris
TTCATGTGTCCTGCAGTTCACAGTCTG	TTCATGTGTCCTGCAGTTCACAGTCTGACGCGCATTTAGCTGCGGTCTTCATCGATCCACGAGCCGAGTGATCCCCAGATC	TTCATGTGTCCTGCAGTTCACAGTCTGACGCGCATTTAGCTGCGGTCTTCATCGATCCACGAGCCGAGTGATCAGATCGGA	5	D2	ACGCGCATTTAGCTTCCACGAGCCGAG	GCGGTCTTCATCGATGATCCCCAGATC	0.131579		-------{-----()-----}--agatcgga	0.00680183	5.8S ribosomal RNA	PREDICTED: Malaya genurostris 5.8S ribosomal RNA (LOC131433328), rRNA	{'superkingdom': 'Eukaryota', 'phylum': 'Arthropoda', 'class': 'Insecta', 'order': 'Diptera', 'family': 'Culicidae', 'genus': 'Malaya', 'species': 'Malaya genurostris'}	Malaya genurostris
TTCATGTGTCCTGCAGTTCACAGTCTG	TTCATGTGTCCTGCAGTTCACAGTCTGACGCGCATTTAGCTGCGGTCTTCATCGATCCACGAGCCGAGTGATCCCCAGATC	TTCATGTGTCCTGCAGTTCACAGTCTGACGCGCATTTAGCTGCGGTCTTCATCGATCCACGAGCCGAGTGAGATCGGAAGA	4	D2	ACGCGCATTTAGCTTCCACGAGCCGAG	GCGGTCTTCATCGATGATCCCCAGATC	0.105263		-------{-----()-----}gat-gga-ga	0.00680183	5.8S ribosomal RNA	PREDICTED: Malaya genurostris 5.8S ribosomal RNA (LOC131433328), rRNA	{'superkingdom': 'Eukaryota', 'phylum': 'Arthropoda', 'class': 'Insecta', 'order': 'Diptera', 'family': 'Culicidae', 'genus': 'Malaya', 'species': 'Malaya genurostris'}	Malaya genurostris
TTCATGTGTCCTGCAGTTCACAGTCTG	TTCATGTGTCCTGCAGTTCACAGTCTGACGCGCATTTAGCTGCGGTCTTCATCGATCCACGAGCCGAGTGATCCCCAGATC	TTCATGTGTCCTGCAGTTCACAGTCTGACGCGCATTTAGCTGCGGTCTTCATCGATCCACGAGCCGAGTGATCCCCTAGAT	3	D2	ACGCGCATTTAGCTTCCACGAGCCGAG	GCGGTCTTCATCGATGATCCCCAGATC	0.0789474		-------{-----()-----}-----tagat	0.00680183	5.8S ribosomal RNA	PREDICTED: Malaya genurostris 5.8S ribosomal RNA (LOC131433328), rRNA	{'superkingdom': 'Eukaryota', 'phylum': 'Arthropoda', 'class': 'Insecta', 'order': 'Diptera', 'family': 'Culicidae', 'genus': 'Malaya', 'species': 'Malaya genurostris'}	Malaya genurostris
TTCATGTGTCCTGCAGTTCACAGTCTG	TTCATGTGTCCTGCAGTTCACAGTCTGACGCGCATTTAGCTGCGGTCTTCATCGATCCACGAGCCGAGTGATCCCCAGATC	TTCATGTGTCCTGCAGTTCACAGTCTGACGCGCATTTAGCTGCGGTCTTCATCGATCCACGAGCCGAGTGATCCCCTGAGA	3	D2	ACGCGCATTTAGCTTCCACGAGCCGAG	GCGGTCTTCATCGATGATCCCCAGATC	0.0789474		-------{-----()-----}-----t--ga	0.00680183	5.8S ribosomal RNA	PREDICTED: Malaya genurostris 5.8S ribosomal RNA (LOC131433328), rRNA	{'superkingdom': 'Eukaryota', 'phylum': 'Arthropoda', 'class': 'Insecta', 'order': 'Diptera', 'family': 'Culicidae', 'genus': 'Malaya', 'species': 'Malaya genurostris'}	Malaya genurostris
GTACTTAGACATGCATGGCTTAACCTT	GTACTTAGACATGCATGGCTTAACCTTTGAGACAAGCGTATATTACTGGTAGGATCAACCAGAATTCGTCAACATTAGCGC	GTACTTAGACATGCATGGCTTAACCTTTGAGACAAGCGTATATTACTGGTAGGATCAACCAGAATTCTCGTCGTGGATAGA	304	D3	TGAGACAAGCGTATTCAACATTAGCGC	ATTACTGGTAGGATCAACCAGAATTCG	0.508361		----{-----(-------)-----}-----t	0.00691947	18S ribosomal RNA	Culex torrentium clone torrentium2 28S ribosomal RNA gene, partial sequence; 28S-18S ribosomal RNA intergenic spacer, complete sequence; and 18S ribosomal RNA gene, partial sequence	{'superkingdom': 'Eukaryota', 'phylum': 'Arthropoda', 'class': 'Insecta', 'order': 'Diptera', 'family': 'Culicidae', 'genus': 'Culex', 'species': 'Culex torrentium'}	Culex torrentium
GTACTTAGACATGCATGGCTTAACCTT	GTACTTAGACATGCATGGCTTAACCTTTGAGACAAGCGTATATTACTGGTAGGATCAACCAGAATTCGTCAACATTAGCGC	GTACTTAGACATGCATGGCTTAACCTTTGAGACAAGCGTATATTACTGGTAGGATCAACCAGAATTCTTCGACACACGATA	226	D3	TGAGACAAGCGTATTCAACATTAGCGC	ATTACTGGTAGGATCAACCAGAATTCG	0.377926		----{-----(-------)-----}-----t	0.00691947	18S ribosomal RNA	Culex torrentium clone torrentium2 28S ribosomal RNA gene, partial sequence; 28S-18S ribosomal RNA intergenic spacer, complete sequence; and 18S ribosomal RNA gene, partial sequence	{'superkingdom': 'Eukaryota', 'phylum': 'Arthropoda', 'class': 'Insecta', 'order': 'Diptera', 'family': 'Culicidae', 'genus': 'Culex', 'species': 'Culex torrentium'}	Culex torrentium
GTACTTAGACATGCATGGCTTAACCTT	GTACTTAGACATGCATGGCTTAACCTTTGAGACAAGCGTATATTACTGGTAGGATCAACCAGAATTCGTCAACATTAGCGC	GTACTTAGACATGCATGGCTTAACCTTTGAGACAAGCGTATATTACTGGTAGGATCAACCAGAATTCGTCAGCATCGCCAC	68	D3	TGAGACAAGCGTATTCAACATTAGCGC	ATTACTGGTAGGATCAACCAGAATTCG	0.113712		----{-----(-------)-----}------	0.00691947	18S ribosomal RNA	Culex torrentium clone torrentium2 28S ribosomal RNA gene, partial sequence; 28S-18S ribosomal RNA intergenic spacer, complete sequence; and 18S ribosomal RNA gene, partial sequence	{'superkingdom': 'Eukaryota', 'phylum': 'Arthropoda', 'class': 'Insecta', 'order': 'Diptera', 'family': 'Culicidae', 'genus': 'Culex', 'species': 'Culex torrentium'}	Culex torrentium
CTCGCCGTTACTGAGGGAATCCTCGTT	CTCGCCGTTACTGAGGGAATCCTCGTTAGTTTCTTTTCCTCCGCTGACTAATATGCTTAAATTCAGCGGGTCGCCACGTC	CTCGCCGTTACTGAGGGAATCCTCGTTAGTTTCTTTTCCTCCGCTGACTAATATGCTTAAATTCAGCGGGTCGCCACGAGA	16	D3	AGTTTCTTTTCCTCGGTCGCCACGTCT	CGCTGACTAATATGCTTAAATTCAGCG	0.410256		{------(---------------)------}	0.00738209	28S ribosomal RNA	PREDICTED: Patagioenas fasciata 28S ribosomal RNA (LOC136103495), rRNA	{'superkingdom': 'Eukaryota', 'phylum': 'Chordata', 'class': 'Aves', 'order': 'Columbiformes', 'family': 'Columbidae', 'genus': 'Patagioenas', 'species': 'Patagioenas fasciata'}	Patagioenas fasciata
CTCGCCGTTACTGAGGGAATCCTCGTT	CTCGCCGTTACTGAGGGAATCCTCGTTAGTTTCTTTTCCTCCGCTGACTAATATGCTTAAATTCAGCGGGTCGCCACGTC	CTCGCCGTTACTGAGGGAATCCTCGTTAGTTTCTTTTCAACTTTCCCTTACGGTACTTGTTGGCTATCGGTCTCGTGCCGG	14	D3	AGTTTCTTTTCCTCGGTCGCCACGTCT	CGCTGACTAATATGCTTAAATTCAGCG	0.358974		{ttTccC(t--cgg-a---gttg)G-tAtc}	0.00738209		PREDICTED: Patagioenas fasciata 28S ribosomal RNA (LOC136103495), rRNA	{'superkingdom': 'Eukaryota', 'phylum': 'Chordata', 'class': 'Aves', 'order': 'Columbiformes', 'family': 'Columbidae', 'genus': 'Patagioenas', 'species': 'Patagioenas fasciata'}	Patagioenas fasciata
CTCGCCGTTACTGAGGGAATCCTCGTT	CTCGCCGTTACTGAGGGAATCCTCGTTAGTTTCTTTTCCTCCGCTGACTAATATGCTTAAATTCAGCGGGTCGCCACGTC	CTCGCCGTTACTGAGGGAATCCTCGTTAGTTTCTTTTCCTCCCCTTATTAATATGCTTAAATTTAGGGGGTAGTCACACAT	5	D3	AGTTTCTTTTCCTCGGTCGCCACGTCT	CGCTGACTAATATGCTTAAATTCAGCG	0.128205		{-C--t-(t--------------)-t--G-}	0.00738209	28S ribosomal RNA	PREDICTED: Patagioenas fasciata 28S ribosomal RNA (LOC136103495), rRNA	{'superkingdom': 'Eukaryota', 'phylum': 'Chordata', 'class': 'Aves', 'order': 'Columbiformes', 'family': 'Columbidae', 'genus': 'Patagioenas', 'species': 'Patagioenas fasciata'}	Patagioenas fasciata
CTCGCCGTTACTGAGGGAATCCTCGTT	CTCGCCGTTACTGAGGGAATCCTCGTTAGTTTCTTTTCCTCCGCTGACTAATATGCTTAAATTCAGCGGGTCGCCACGTC	CTCGCCGTTACTGAGGGAATCCTCGTTAGTTTCTTTTCCTCCGCTGACTAATATGCTTAAATTCAGCGGGTCGCCAAGATC	4	D3	AGTTTCTTTTCCTCGGTCGCCACGTCT	CGCTGACTAATATGCTTAAATTCAGCG	0.102564		{------(---------------)------}	0.00738209	28S ribosomal RNA	PREDICTED: Patagioenas fasciata 28S ribosomal RNA (LOC136103495), rRNA	{'superkingdom': 'Eukaryota', 'phylum': 'Chordata', 'class': 'Aves', 'order': 'Columbiformes', 'family': 'Columbidae', 'genus': 'Patagioenas', 'species': 'Patagioenas fasciata'}	Patagioenas fasciata
AACCGCGGCTGCTGGCACCAGACTAGC	AACCGCGGCTGCTGGCACCAGACTAGCCCTCCACTTGATCCTTACCGAAGGATTTATGCTCGGTTCATTCCAATTATAAA	AACCGCGGCTGCTGGCACCAGACTAGCCCTCCACTTGATCCTTGTTGAAGGATTTATGCTCAACTCATTCCAATTATAAGA	4	D3	CCTCCACTTGATCCTCCAATTATAAAA	TTACCGAAGGATTTATGCTCGGTTCAT	0.571429		--{GTT--(-----------)--AAC}----	0.0077361	18S ribosomal RNA	Culex tritaeniorhynchus isolate MG_S115 small subunit ribosomal RNA, partial sequence	{'superkingdom': 'Eukaryota', 'phylum': 'Arthropoda', 'class': 'Insecta', 'order': 'Diptera', 'family': 'Culicidae', 'genus': 'Culex', 'species': 'Culex tritaeniorhynchus'}	Culex tritaeniorhynchus
AACCGCGGCTGCTGGCACCAGACTAGC	AACCGCGGCTGCTGGCACCAGACTAGCCCTCCACTTGATCCTTACCGAAGGATTTATGCTCGGTTCATTCCAATTATAAA	AACCGCGGCTGCTGGCACCAGACTAGCACTCCACATGATCATTACCGAAGGATTAATGCTCGGTTCAAACCAATTATAAAA	1	D3	CCTCCACTTGATCCTCCAATTATAAAA	TTACCGAAGGATTTATGCTCGGTTCAT	0.142857		--{-----(------a----)-----}---a	0.0077361		Culex tritaeniorhynchus isolate MG_S115 small subunit ribosomal RNA, partial sequence	{'superkingdom': 'Eukaryota', 'phylum': 'Arthropoda', 'class': 'Insecta', 'order': 'Diptera', 'family': 'Culicidae', 'genus': 'Culex', 'species': 'Culex tritaeniorhynchus'}	Culex tritaeniorhynchus
AACCGCGGCTGCTGGCACCAGACTAGC	AACCGCGGCTGCTGGCACCAGACTAGCCCTCCACTTGATCCTTACCGAAGGATTTATGCTCGGTTCATTCCAATTATAAA	AACCGCGGCTGCTGGCACCAGACTAGCCCAACACTTGATCCTAACCGAAGGAATTATTCTCGGTTCATAACAATTATAAAA	1	D3	CCTCCACTTGATCCTCCAATTATAAAA	TTACCGAAGGATTTATGCTCGGTTCAT	0.142857		-a{-----(----a----t-)-----}----	0.0077361		Culex tritaeniorhynchus isolate MG_S115 small subunit ribosomal RNA, partial sequence	{'superkingdom': 'Eukaryota', 'phylum': 'Arthropoda', 'class': 'Insecta', 'order': 'Diptera', 'family': 'Culicidae', 'genus': 'Culex', 'species': 'Culex tritaeniorhynchus'}	Culex tritaeniorhynchus
AACCGCGGCTGCTGGCACCAGACTAGC	AACCGCGGCTGCTGGCACCAGACTAGCCCTCCACTTGATCCTTACCGAAGGATTTATGCTCGGTTCATTCCAATTATAAA	AACCGCGGCTGCTGGCACCAGACTAGCCCTCCACATGATCCTTGTTGAAGGAATTAAGCTCAACTCATTACAAATATAAGA	1	D3	CCTCCACTTGATCCTCCAATTATAAAA	TTACCGAAGGATTTATGCTCGGTTCAT	0.142857		--{GTT--(----a---a--)--AAC}----	0.0077361		Culex tritaeniorhynchus isolate MG_S115 small subunit ribosomal RNA, partial sequence	{'superkingdom': 'Eukaryota', 'phylum': 'Arthropoda', 'class': 'Insecta', 'order': 'Diptera', 'family': 'Culicidae', 'genus': 'Culex', 'species': 'Culex tritaeniorhynchus'}	Culex tritaeniorhynchus
TGCATGTGTCCTGCAGTTCACATTCTG	TGCATGTGTCCTGCAGTTCACATTCTGACGCGCATTTAGCTGCGGTCTTCATCGATCCACGAGCCGAGTGATCCCCAGATC	TGCATGTGTCCTGCAGTTCACATTCTGACGCGCATTTAGCTGCGGTCTTCATCGATCCACGAGCCGAGTGATCCCCTAGAT	2	D2	ACGCGCATTTAGCTTCCACGAGCCGAG	GCGGTCTTCATCGATGATCCCCAGATC	0.333333		-------{-----()-----}-----tagat	0.00774372	5.8S ribosomal RNA	Aedes flavopictus clone 12_3 18S ribosomal RNA gene, partial sequence; internal transcribed spacer 1, 5.8S ribosomal RNA gene and internal transcribed spacer 2, complete sequence; and 28S ribosomal RNA gene, partial sequence	{'superkingdom': 'Eukaryota', 'phylum': 'Arthropoda', 'class': 'Insecta', 'order': 'Diptera', 'family': 'Culicidae', 'genus': 'Aedes', 'species': 'Aedes flavopictus'}	Aedes flavopictus
TGCATGTGTCCTGCAGTTCACATTCTG	TGCATGTGTCCTGCAGTTCACATTCTGACGCGCATTTAGCTGCGGTCTTCATCGATCCACGAGCCGAGTGATCCCCAGATC	TGCATGTGTCCTGCAGTTCACATTCTGACGCGCATTTAGCTGCGGTCTTCATCGATCCACGAGCCGAGTGAGATCGGAAGA	1	D2	ACGCGCATTTAGCTTCCACGAGCCGAG	GCGGTCTTCATCGATGATCCCCAGATC	0.166667		-------{-----()-----}gat-gga-ga	0.00774372	5.8S ribosomal RNA	Aedes flavopictus clone 12_3 18S ribosomal RNA gene, partial sequence; internal transcribed spacer 1, 5.8S ribosomal RNA gene and internal transcribed spacer 2, complete sequence; and 28S ribosomal RNA gene, partial sequence	{'superkingdom': 'Eukaryota', 'phylum': 'Arthropoda', 'class': 'Insecta', 'order': 'Diptera', 'family': 'Culicidae', 'genus': 'Aedes', 'species': 'Aedes flavopictus'}	Aedes flavopictus
TGCATGTGTCCTGCAGTTCACATTCTG	TGCATGTGTCCTGCAGTTCACATTCTGACGCGCATTTAGCTGCGGTCTTCATCGATCCACGAGCCGAGTGATCCCCAGATC	TGCATGTGTCCTGCAGTTCACATTCTGACGCGCATTTAGCTGCGGTCTTCATCGATCCACGAGCCGAGTGATCAGATCGGA	1	D2	ACGCGCATTTAGCTTCCACGAGCCGAG	GCGGTCTTCATCGATGATCCCCAGATC	0.166667		-------{-----()-----}--agatcgga	0.00774372	5.8S ribosomal RNA	Aedes flavopictus clone 12_3 18S ribosomal RNA gene, partial sequence; internal transcribed spacer 1, 5.8S ribosomal RNA gene and internal transcribed spacer 2, complete sequence; and 28S ribosomal RNA gene, partial sequence	{'superkingdom': 'Eukaryota', 'phylum': 'Arthropoda', 'class': 'Insecta', 'order': 'Diptera', 'family': 'Culicidae', 'genus': 'Aedes', 'species': 'Aedes flavopictus'}	Aedes flavopictus
TGCATGTGTCCTGCAGTTCACATTCTG	TGCATGTGTCCTGCAGTTCACATTCTGACGCGCATTTAGCTGCGGTCTTCATCGATCCACGAGCCGAGTGATCCCCAGATC	TGCATGTGTCCTGCAGTTCACATTCTGACGCGCATTTAGCTGCGGTCTTCATCGATCCACGAGCCGAGTGATCCCAGATCG	1	D2	ACGCGCATTTAGCTTCCACGAGCCGAG	GCGGTCTTCATCGATGATCCCCAGATC	0.166667		-------{-----()-----}----agatcg	0.00774372	5.8S ribosomal RNA	Aedes flavopictus clone 12_3 18S ribosomal RNA gene, partial sequence; internal transcribed spacer 1, 5.8S ribosomal RNA gene and internal transcribed spacer 2, complete sequence; and 28S ribosomal RNA gene, partial sequence	{'superkingdom': 'Eukaryota', 'phylum': 'Arthropoda', 'class': 'Insecta', 'order': 'Diptera', 'family': 'Culicidae', 'genus': 'Aedes', 'species': 'Aedes flavopictus'}	Aedes flavopictus
TGCATGTGTCCTGCAGTTCACATTCTG	TGCATGTGTCCTGCAGTTCACATTCTGACGCGCATTTAGCTGCGGTCTTCATCGATCCACGAGCCGAGTGATCCCCAGATC	TGCATGTGTCCTGCAGTTCACATTCTGACGCGCATTTAGCTGCGGTCTTCATCGATCCACTAGCCGAGTGATCCCCTGCCT	1	D2	ACGCGCATTTAGCTTCCACGAGCCGAG	GCGGTCTTCATCGATGATCCCCAGATC	0.166667		-------{-----()-----}-----t-cct	0.00774372	5.8S ribosomal RNA	Aedes flavopictus clone 12_3 18S ribosomal RNA gene, partial sequence; internal transcribed spacer 1, 5.8S ribosomal RNA gene and internal transcribed spacer 2, complete sequence; and 28S ribosomal RNA gene, partial sequence	{'superkingdom': 'Eukaryota', 'phylum': 'Arthropoda', 'class': 'Insecta', 'order': 'Diptera', 'family': 'Culicidae', 'genus': 'Aedes', 'species': 'Aedes flavopictus'}	Aedes flavopictus
CTAGTGGAGCTGGAATTACCGGGGCTG	CTAGTGGAGCTGGAATTACCGGGGCTGCTGGCACCAGACTTGCCCTCCACTTGATCCTTACCGAAGGATTTATGCTCGGTT	CTAGTGGAGCTGGAATTACCGGGGCTGCTGGCACCAGACTTGCCCTCCACTTGATCCTTGTTGAAGGATTTATGCTCAACT	4	D1	CTGGCACCAGACTTGCCCTCCACTTGAT	CCTTACCGAAGGATTTATGCTCGGTT	0.5		----{GTT--(-----------)--AAC}-	0.0080341	18S ribosomal RNA	Culex tritaeniorhynchus isolate MG_S115 small subunit ribosomal RNA, partial sequence	{'superkingdom': 'Eukaryota', 'phylum': 'Arthropoda', 'class': 'Insecta', 'order': 'Diptera', 'family': 'Culicidae', 'genus': 'Culex', 'species': 'Culex tritaeniorhynchus'}	Culex tritaeniorhynchus
CTAGTGGAGCTGGAATTACCGGGGCTG	CTAGTGGAGCTGGAATTACCGGGGCTGCTGGCACCAGACTTGCCCTCCACTTGATCCTTACCGAAGGATTTATGCTCGGTT	CTAGTGGAGCTGGAATTACCGGGGCTGCTGGCACCAGACTTGCCGGCCACTGGGTCCTTGCCGAAGGATTTATGCTGGGTT	2	D1	CTGGCACCAGACTTGCCCTCCACTTGAT	CCTTACCGAAGGATTTATGCTCGGTT	0.25		----{g----(-----------)-g---}-	0.0080341		Culex tritaeniorhynchus isolate MG_S115 small subunit ribosomal RNA, partial sequence	{'superkingdom': 'Eukaryota', 'phylum': 'Arthropoda', 'class': 'Insecta', 'order': 'Diptera', 'family': 'Culicidae', 'genus': 'Culex', 'species': 'Culex tritaeniorhynchus'}	Culex tritaeniorhynchus
CTAGTGGAGCTGGAATTACCGGGGCTG	CTAGTGGAGCTGGAATTACCGGGGCTGCTGGCACCAGACTTGCCCTCCACTTGATCCTTACCGAAGGATTTATGCTCGGTT	CTAGTGGAGCTGGAATTACCGGGGCTGCTGGCACCAGACTTGCCCTCCACTTGAGGCTTGTTGAAGGGTGTATGCTCAACT	1	D1	CTGGCACCAGACTTGCCCTCCACTTGAT	CCTTACCGAAGGATTTATGCTCGGTT	0.125		g---{GTT--(---g-g-----)--AAC}-	0.0080341	18S ribosomal RNA	Culex tritaeniorhynchus isolate MG_S115 small subunit ribosomal RNA, partial sequence	{'superkingdom': 'Eukaryota', 'phylum': 'Arthropoda', 'class': 'Insecta', 'order': 'Diptera', 'family': 'Culicidae', 'genus': 'Culex', 'species': 'Culex tritaeniorhynchus'}	Culex tritaeniorhynchus
CTAGTGGAGCTGGAATTACCGGGGCTG	CTAGTGGAGCTGGAATTACCGGGGCTGCTGGCACCAGACTTGCCCTCCACTTGATCCTTACCGAAGGATTTATGCTCGGTT	CTAGTGGAGCTGGAATTACCGGGGCTGCTGGCACCAGACTTGCCCTCCACTTGATGCGTGTTGAAGGGTTGATGCACAGCT	1	D1	CTGGCACCAGACTTGCCCTCCACTTGAT	CCTTACCGAAGGATTTATGCTCGGTT	0.125		g-g-{GtT--(---g--g----)a-A-C}-	0.0080341	18S ribosomal RNA	Culex tritaeniorhynchus isolate MG_S115 small subunit ribosomal RNA, partial sequence	{'superkingdom': 'Eukaryota', 'phylum': 'Arthropoda', 'class': 'Insecta', 'order': 'Diptera', 'family': 'Culicidae', 'genus': 'Culex', 'species': 'Culex tritaeniorhynchus'}	Culex tritaeniorhynchus
GTTGACATTCAGAGCACTGGGCAGAAT	GTTGACATTCAGAGCACTGGGCAGAATCACATTGTGTCAACACCTGCGGAGGCCATCACAATGCTTTGTTTTAATTAGACA	GTTGACATTCAGAGCACTGGGCAGAATTCACATTGTGTCAACACCTGCGGAGGCCATCACAATGCTTTGTTTTAATTAGAC	149	D2	CACATTGTGTCAACTCACAATGCTTTG	ACCTGCGGAGGCCATTTTAATTAGACA	0.5	tc{Aca-TGt(gtc-aa)tCAc-aT}gc--t		0.00806905	28S ribosomal RNA	PREDICTED: Wyeomyia smithii large subunit ribosomal RNA (LOC129719297), rRNA	{'superkingdom': 'Eukaryota', 'phylum': 'Arthropoda', 'class': 'Insecta', 'order': 'Diptera', 'family': 'Culicidae', 'genus': 'Wyeomyia', 'species': 'Wyeomyia smithii'}	Wyeomyia smithii
GTTGACATTCAGAGCACTGGGCAGAAT	GTTGACATTCAGAGCACTGGGCAGAATCACATTGTGTCAACACCTGCGGAGGCCATCACAATGCTTTGTTTTAATTAGACA	GTTGACATTCAGAGCACTGGGCAGAATCACATTGTGTCAACACCTTTTGAGGCCATCACAATGCTTTGTTTTAATTAGACA	110	D2	CACATTGTGTCAACTCACAATGCTTTG	ACCTGCGGAGGCCATTTTAATTAGACA	0.369128	--{-------(------)-------}-----		0.00806905	28S ribosomal RNA	PREDICTED: Wyeomyia smithii large subunit ribosomal RNA (LOC129719297), rRNA	{'superkingdom': 'Eukaryota', 'phylum': 'Arthropoda', 'class': 'Insecta', 'order': 'Diptera', 'family': 'Culicidae', 'genus': 'Wyeomyia', 'species': 'Wyeomyia smithii'}	Wyeomyia smithii
GTTGACATTCAGAGCACTGGGCAGAAT	GTTGACATTCAGAGCACTGGGCAGAATCACATTGTGTCAACACCTGCGGAGGCCATCACAATGCTTTGTTTTAATTAGACA	GTTGACATTCAGAGCACTGGGCAGAATTCACATTGTGTCAACACCTTTTGAGGCCATCACAATGCTTTGTTTTAATTAGAC	39	D2	CACATTGTGTCAACTCACAATGCTTTG	ACCTGCGGAGGCCATTTTAATTAGACA	0.130872	tc{Aca-TGt(gtc-aa)tCAc-aT}gc--t		0.00806905	28S ribosomal RNA	PREDICTED: Wyeomyia smithii large subunit ribosomal RNA (LOC129719297), rRNA	{'superkingdom': 'Eukaryota', 'phylum': 'Arthropoda', 'class': 'Insecta', 'order': 'Diptera', 'family': 'Culicidae', 'genus': 'Wyeomyia', 'species': 'Wyeomyia smithii'}	Wyeomyia smithii
TGTACTTAGACATGCATGGCTTAACCT	TGTACTTAGACATGCATGGCTTAACCTTTGAGACAAGCGTATATTACTGGTAGGATCAACCAGAATTCGTCAACATTAGCG	TGTACTTAGACATGCATGGCTTAACCTTTGAGACAAGCGTATATTACTGGTAGGATCAACCAGAATTCTCGTCGTGGATAG	180	D3	TTGAGACAAGCGTAGTCAACATTAGCG	TATTACTGGTAGGATCAACCAGAATTC	0.550459		-----{-----(-------)-----}-----	0.00851353	18S ribosomal RNA	Culex torrentium clone torrentium2 28S ribosomal RNA gene, partial sequence; 28S-18S ribosomal RNA intergenic spacer, complete sequence; and 18S ribosomal RNA gene, partial sequence	{'superkingdom': 'Eukaryota', 'phylum': 'Arthropoda', 'class': 'Insecta', 'order': 'Diptera', 'family': 'Culicidae', 'genus': 'Culex', 'species': 'Culex torrentium'}	Culex torrentium
TGTACTTAGACATGCATGGCTTAACCT	TGTACTTAGACATGCATGGCTTAACCTTTGAGACAAGCGTATATTACTGGTAGGATCAACCAGAATTCGTCAACATTAGCG	TGTACTTAGACATGCATGGCTTAACCTTTGAGACAAGCGTATATTACTGGTAGGATCAACCAGAATTCTTCGACACACGAT	114	D3	TTGAGACAAGCGTAGTCAACATTAGCG	TATTACTGGTAGGATCAACCAGAATTC	0.348624		-----{-----(-------)-----}-----	0.00851353	18S ribosomal RNA	Culex torrentium clone torrentium2 28S ribosomal RNA gene, partial sequence; 28S-18S ribosomal RNA intergenic spacer, complete sequence; and 18S ribosomal RNA gene, partial sequence	{'superkingdom': 'Eukaryota', 'phylum': 'Arthropoda', 'class': 'Insecta', 'order': 'Diptera', 'family': 'Culicidae', 'genus': 'Culex', 'species': 'Culex torrentium'}	Culex torrentium
TGTACTTAGACATGCATGGCTTAACCT	TGTACTTAGACATGCATGGCTTAACCTTTGAGACAAGCGTATATTACTGGTAGGATCAACCAGAATTCGTCAACATTAGCG	TGTACTTAGACATGCATGGCTTAACCTTTGAGACAAGCGTATATTACTGGTAGGATCAACCAGAATTCGTCAGCATCGCCA	33	D3	TTGAGACAAGCGTAGTCAACATTAGCG	TATTACTGGTAGGATCAACCAGAATTC	0.100917		-----{-----(-------)-----}-----	0.00851353	18S ribosomal RNA	Culex torrentium clone torrentium2 28S ribosomal RNA gene, partial sequence; 28S-18S ribosomal RNA intergenic spacer, complete sequence; and 18S ribosomal RNA gene, partial sequence	{'superkingdom': 'Eukaryota', 'phylum': 'Arthropoda', 'class': 'Insecta', 'order': 'Diptera', 'family': 'Culicidae', 'genus': 'Culex', 'species': 'Culex torrentium'}	Culex torrentium
CTAAGAACGACCATGCACCACTACCCT	CTAAGAACGACCATGCACCACTACCCTTAAGTTTGAGAAAGAGCTATTAATCTGTCTTACCTCAATAAGTTCGGACCTGGT	CTAAGAACGACCATGCACCACTACCCTTAATTTTGAGAAAGAGCTATTAATCTGTCTTACCTCAATAAGTTCGAGATCGGA	3	D2	TAAGTTTGAGAAAGCTTACCTCAATAA	AGCTATTAATCTGTGTTCGGACCTGGT	0.272727	---t-{-----(---------)-----}---		0.00884751		Mansonia titillans isolate S105 small subunit ribosomal RNA, partial sequence	{'superkingdom': 'Eukaryota', 'phylum': 'Arthropoda', 'class': 'Insecta', 'order': 'Diptera', 'family': 'Culicidae', 'genus': 'Mansonia', 'species': 'Mansonia titillans'}	Mansonia titillans
CTAAGAACGACCATGCACCACTACCCT	CTAAGAACGACCATGCACCACTACCCTTAAGTTTGAGAAAGAGCTATTAATCTGTCTTACCTCAATAAGTTCGGACCTGGT	CTAAGAACGACCATGCACCACTACCCTTAATTTTGAGAAAGAGCTATTAATCTGTCTTACCTCAATAAGTTCGGACCTGAG	3	D2	TAAGTTTGAGAAAGCTTACCTCAATAA	AGCTATTAATCTGTGTTCGGACCTGGT	0.272727	---t-{-----(---------)-----}---		0.00884751	18S ribosomal RNA	Mansonia titillans isolate S105 small subunit ribosomal RNA, partial sequence	{'superkingdom': 'Eukaryota', 'phylum': 'Arthropoda', 'class': 'Insecta', 'order': 'Diptera', 'family': 'Culicidae', 'genus': 'Mansonia', 'species': 'Mansonia titillans'}	Mansonia titillans
CTAAGAACGACCATGCACCACTACCCT	CTAAGAACGACCATGCACCACTACCCTTAAGTTTGAGAAAGAGCTATTAATCTGTCTTACCTCAATAAGTTCGGACCTGGT	CTAAGAACGACCATGCACCACTACCCTTAAGTTTGAGAAAGAGCTATTAATCTGTCTTACCTCAATAAGTTCGGAGATCGG	2	D2	TAAGTTTGAGAAAGCTTACCTCAATAA	AGCTATTAATCTGTGTTCGGACCTGGT	0.181818	-----{-----(---------)-----}---		0.00884751		Mansonia titillans isolate S105 small subunit ribosomal RNA, partial sequence	{'superkingdom': 'Eukaryota', 'phylum': 'Arthropoda', 'class': 'Insecta', 'order': 'Diptera', 'family': 'Culicidae', 'genus': 'Mansonia', 'species': 'Mansonia titillans'}	Mansonia titillans
CTAAGAACGACCATGCACCACTACCCT	CTAAGAACGACCATGCACCACTACCCTTAAGTTTGAGAAAGAGCTATTAATCTGTCTTACCTCAATAAGTTCGGACCTGGT	CTAAGAACGACCATGCACCACTACCCTTAAGTTTGAGAAAGAGCTATTAATCTGTCTTACCTCAATAAGTTCGGACAGATC	1	D2	TAAGTTTGAGAAAGCTTACCTCAATAA	AGCTATTAATCTGTGTTCGGACCTGGT	0.0909091	-----{-----(---------)-----}---		0.00884751	18S ribosomal RNA	Mansonia titillans isolate S105 small subunit ribosomal RNA, partial sequence	{'superkingdom': 'Eukaryota', 'phylum': 'Arthropoda', 'class': 'Insecta', 'order': 'Diptera', 'family': 'Culicidae', 'genus': 'Mansonia', 'species': 'Mansonia titillans'}	Mansonia titillans
CTAAGAACGACCATGCACCACTACCCT	CTAAGAACGACCATGCACCACTACCCTTAAGTTTGAGAAAGAGCTATTAATCTGTCTTACCTCAATAAGTTCGGACCTGGT	CTAAGAACGACCATGCACCACTACCCTTAAGTTTGAGGAGGAGCGATTAATCTGTCTTACCTCAATAAGTTCGGACCTGGT	1	D2	TAAGTTTGAGAAAGCTTACCTCAATAA	AGCTATTAATCTGTGTTCGGACCTGGT	0.0909091	-----{-----(g-g------)-----}---		0.00884751		Mansonia titillans isolate S105 small subunit ribosomal RNA, partial sequence	{'superkingdom': 'Eukaryota', 'phylum': 'Arthropoda', 'class': 'Insecta', 'order': 'Diptera', 'family': 'Culicidae', 'genus': 'Mansonia', 'species': 'Mansonia titillans'}	Mansonia titillans
CTAAGAACGACCATGCACCACTACCCT	CTAAGAACGACCATGCACCACTACCCTTAAGTTTGAGAAAGAGCTATTAATCTGTCTTACCTCAATAAGTTCGGACCTGGT	CTAAGAACGACCATGCACCACTACCCTTAATTTTGAGAAAGATCTAAAAATCTGTCTTACCTCAATAAGTTCGGACCTGGT	1	D2	TAAGTTTGAGAAAGCTTACCTCAATAA	AGCTATTAATCTGTGTTCGGACCTGGT	0.0909091	---t-{-----(---------)-----}---		0.00884751	18S ribosomal RNA	Mansonia titillans isolate S105 small subunit ribosomal RNA, partial sequence	{'superkingdom': 'Eukaryota', 'phylum': 'Arthropoda', 'class': 'Insecta', 'order': 'Diptera', 'family': 'Culicidae', 'genus': 'Mansonia', 'species': 'Mansonia titillans'}	Mansonia titillans
GAGCTGGAATTACCGCGGCAGCTGGCA	GAGCTGGAATTACCGCGGCAGCTGGCACCAGACTTGCCCTCCACTTGATCCTTACCGAAGGATTTATGCTCGGTTCATTC	GAGCTGGAATTACCGCGGCAGCTGGCACCAGACTTGCCCTCCACTTGATCCTTATTGAAGGATTTATGCTCAACTCATTCC	6	D3	CCAGACTTGCCCTCCTCGGTTCATTCC	CACTTGATCCTTACCGAAGGATTTATG	0.6		------{------(-tt-)------}-----	0.00884751	18S ribosomal RNA	Culex tritaeniorhynchus isolate MG_S115 small subunit ribosomal RNA, partial sequence	{'superkingdom': 'Eukaryota', 'phylum': 'Arthropoda', 'class': 'Insecta', 'order': 'Diptera', 'family': 'Culicidae', 'genus': 'Culex', 'species': 'Culex tritaeniorhynchus'}	Culex tritaeniorhynchus
GAGCTGGAATTACCGCGGCAGCTGGCA	GAGCTGGAATTACCGCGGCAGCTGGCACCAGACTTGCCCTCCACTTGATCCTTACCGAAGGATTTATGCTCGGTTCATTC	GAGCTGGAATTACCGCGGCAGCTGGCACAATACTTGCCCTCCACTTGATCCTTGTTGAAGGATTTATGCTCAACTCATTCC	2	D3	CCAGACTTGCCCTCCTCGGTTCATTCC	CACTTGATCCTTACCGAAGGATTTATG	0.2		------{------(gtt-)------}-----	0.00884751	18S ribosomal RNA	Culex tritaeniorhynchus isolate MG_S115 small subunit ribosomal RNA, partial sequence	{'superkingdom': 'Eukaryota', 'phylum': 'Arthropoda', 'class': 'Insecta', 'order': 'Diptera', 'family': 'Culicidae', 'genus': 'Culex', 'species': 'Culex tritaeniorhynchus'}	Culex tritaeniorhynchus
GAGCTGGAATTACCGCGGCAGCTGGCA	GAGCTGGAATTACCGCGGCAGCTGGCACCAGACTTGCCCTCCACTTGATCCTTACCGAAGGATTTATGCTCGGTTCATTC	GAGCTGGAATTACCGCGGCAGCTGGCACCAGACTTGCCCTCAACATGATCCTTGTTGAAGGATTTATGCTCAACTCATTCC	2	D3	CCAGACTTGCCCTCCTCGGTTCATTCC	CACTTGATCCTTACCGAAGGATTTATG	0.2		a--a--{------(gtt-)------}-----	0.00884751	18S ribosomal RNA	Culex tritaeniorhynchus isolate MG_S115 small subunit ribosomal RNA, partial sequence	{'superkingdom': 'Eukaryota', 'phylum': 'Arthropoda', 'class': 'Insecta', 'order': 'Diptera', 'family': 'Culicidae', 'genus': 'Culex', 'species': 'Culex tritaeniorhynchus'}	Culex tritaeniorhynchus
CGGTCATCCATCTAAGTACTAATCGCG	CGGTCATCCATCTAAGTACTAATCGCGCCCGATGTTGCTTAACTTCGGTGATCGGACGAGAACCGGTGTTTTCAAGATCGG	CGGTCATCCATCTAAGTACTAATCGCGCCCGATGTTGCTTAACTTCGGTGATCGGACGAGAACCGGTGTTTTCAACATGAG	9	D1	CCCGATGTTGCTTAACTTCGGTGATCGG	ACGAGAACCGGTGTTTTCAAGATCGG	0.310345	-{-----(-----------------)-----}		0.00924632	5S ribosomal RNA	PREDICTED: Uranotaenia lowii 5S ribosomal RNA (LOC129740736), rRNA	{'superkingdom': 'Eukaryota', 'phylum': 'Arthropoda', 'class': 'Insecta', 'order': 'Diptera', 'family': 'Culicidae', 'genus': 'Uranotaenia', 'species': 'Uranotaenia lowii'}	Uranotaenia lowii
CGGTCATCCATCTAAGTACTAATCGCG	CGGTCATCCATCTAAGTACTAATCGCGCCCGATGTTGCTTAACTTCGGTGATCGGACGAGAACCGGTGTTTTCAAGATCGG	CGGTCATCCATCTAAGTACTAATCGCGCCCGATGTTGCTTAACTTCGGTGATCGGACGAGAACCGGTGTTTTCAACAGATC	7	D1	CCCGATGTTGCTTAACTTCGGTGATCGG	ACGAGAACCGGTGTTTTCAAGATCGG	0.241379	-{-----(-----------------)-----}		0.00924632	5S ribosomal RNA	PREDICTED: Uranotaenia lowii 5S ribosomal RNA (LOC129740736), rRNA	{'superkingdom': 'Eukaryota', 'phylum': 'Arthropoda', 'class': 'Insecta', 'order': 'Diptera', 'family': 'Culicidae', 'genus': 'Uranotaenia', 'species': 'Uranotaenia lowii'}	Uranotaenia lowii
CGGTCATCCATCTAAGTACTAATCGCG	CGGTCATCCATCTAAGTACTAATCGCGCCCGATGTTGCTTAACTTCGGTGATCGGACGAGAACCGGTGTTTTCAAGATCGG	CGGTCATCCATCTAAGTACTAATCGCGCCCGATGTTGCTTAACTTCGGTGATCGGACGAGAACCGGTGTTTTCAAAGATCG	6	D1	CCCGATGTTGCTTAACTTCGGTGATCGG	ACGAGAACCGGTGTTTTCAAGATCGG	0.206897	-{-----(-----------------)-----}		0.00924632	5S ribosomal RNA	PREDICTED: Uranotaenia lowii 5S ribosomal RNA (LOC129740736), rRNA	{'superkingdom': 'Eukaryota', 'phylum': 'Arthropoda', 'class': 'Insecta', 'order': 'Diptera', 'family': 'Culicidae', 'genus': 'Uranotaenia', 'species': 'Uranotaenia lowii'}	Uranotaenia lowii
CGGTCATCCATCTAAGTACTAATCGCG	CGGTCATCCATCTAAGTACTAATCGCGCCCGATGTTGCTTAACTTCGGTGATCGGACGAGAACCGGTGTTTTCAAGATCGG	CGGTCATCCATCTAAGTACTAATCGCGCCCGATGTTGCTTAACTTCGGTGATCGGACGAGAACTGGTGTTTTCAACATGGA	4	D1	CCCGATGTTGCTTAACTTCGGTGATCGG	ACGAGAACCGGTGTTTTCAAGATCGG	0.137931	-{-----(-----------------)-----}		0.00924632	5S ribosomal RNA	PREDICTED: Uranotaenia lowii 5S ribosomal RNA (LOC129740736), rRNA	{'superkingdom': 'Eukaryota', 'phylum': 'Arthropoda', 'class': 'Insecta', 'order': 'Diptera', 'family': 'Culicidae', 'genus': 'Uranotaenia', 'species': 'Uranotaenia lowii'}	Uranotaenia lowii
CGGTCATCCATCTAAGTACTAATCGCG	CGGTCATCCATCTAAGTACTAATCGCGCCCGATGTTGCTTAACTTCGGTGATCGGACGAGAACCGGTGTTTTCAAGATCGG	CGGTCATCCATCTAAGTACTAATCGCGCCCGATGTTGCTTAACTTCGGTGATCGGACGAGAACCGGTGTTTTCAGATCGGA	3	D1	CCCGATGTTGCTTAACTTCGGTGATCGG	ACGAGAACCGGTGTTTTCAAGATCGG	0.103448	-{-----(-----------------)-----}		0.00924632	5S ribosomal RNA	PREDICTED: Uranotaenia lowii 5S ribosomal RNA (LOC129740736), rRNA	{'superkingdom': 'Eukaryota', 'phylum': 'Arthropoda', 'class': 'Insecta', 'order': 'Diptera', 'family': 'Culicidae', 'genus': 'Uranotaenia', 'species': 'Uranotaenia lowii'}	Uranotaenia lowii
CTCTGGCTTCGCCCCGCTCAGGCATAG	CTCTGGCTTCGCCCCGCTCAGGCATAGTTCACCATCTTTCGGGTCCCGACAGGCATGCTCTCACTCGAACCCTTCTCAGAA	CTCTGGCTTCGCCCCGCTCAGGCATAGTTCACCATCTTTCGGGTCCCGACAGGTATGCTCACTCGAACCCTTCTCAGAAGA	3	D1	TTCACCATCTTTCGGGTCCCGACAGGCA	TGCTCTCACTCGAACCCTTCTCAGAA	0.5	-----------{-----(-)-----}----t-		0.00930142		Prunus armeniaca genome assembly, chromosome: 7	{'superkingdom': 'Eukaryota', 'phylum': 'Streptophyta', 'class': 'Magnoliopsida', 'order': 'Rosales', 'family': 'Rosaceae', 'genus': 'Prunus', 'species': 'Prunus armeniaca'}	Prunus armeniaca
CTCTGGCTTCGCCCCGCTCAGGCATAG	CTCTGGCTTCGCCCCGCTCAGGCATAGTTCACCATCTTTCGGGTCCCGACAGGCATGCTCTCACTCGAACCCTTCTCAGAA	CTCTGGCTTCGCCCCGCTCAGGCATAGTTCACCATCTTTCGGGTCCCGACAGGCGTGCTCCAACTCGAACCCTTCACAGAA	2	D1	TTCACCATCTTTCGGGTCCCGACAGGCA	TGCTCTCACTCGAACCCTTCTCAGAA	0.333333	-----------{-----(-)-----}-----g		0.00930142	28S ribosomal RNA	Prunus armeniaca genome assembly, chromosome: 7	{'superkingdom': 'Eukaryota', 'phylum': 'Streptophyta', 'class': 'Magnoliopsida', 'order': 'Rosales', 'family': 'Rosaceae', 'genus': 'Prunus', 'species': 'Prunus armeniaca'}	Prunus armeniaca
CTCTGGCTTCGCCCCGCTCAGGCATAG	CTCTGGCTTCGCCCCGCTCAGGCATAGTTCACCATCTTTCGGGTCCCGACAGGCATGCTCTCACTCGAACCCTTCTCAGAA	CTCTGGCTTCGCCCCGCTCAGGCATAGTTCACCATCTTTCGGGTCCCGACAGGTATGCTCTCACTCGAACCCTTCACATAT	1	D1	TTCACCATCTTTCGGGTCCCGACAGGCA	TGCTCTCACTCGAACCCTTCTCAGAA	0.166667	-----------{-----(-)-----}----t-		0.00930142	28S ribosomal RNA	Prunus armeniaca genome assembly, chromosome: 7	{'superkingdom': 'Eukaryota', 'phylum': 'Streptophyta', 'class': 'Magnoliopsida', 'order': 'Rosales', 'family': 'Rosaceae', 'genus': 'Prunus', 'species': 'Prunus armeniaca'}	Prunus armeniaca
GTCTCCCTATGGGAGAGCTATCAGATG	GTCTCCCTATGGGAGAGCTATCAGATGTTAAGCTGATAAGAACAGATACTACACTTTGATCTTAGCCTTTAGAGATCGGA	GTCTCCCTATGGGAGAGCTATCAGATGTTAAGCTGATAAGAACAGATACTACACTTTGATCTTAGCCTTTAGGAGATCGGA	3	D2	TTAAGCTGATAAGATTGATCTTAGCCT	ACAGATACTACACTTTAGAGATCGGAA	0.5	---------{------(--)------}----		0.0100308	U2 spliceosomal RNA	Anopheles arabiensis genome assembly, chromosome: 2	{'superkingdom': 'Eukaryota', 'phylum': 'Arthropoda', 'class': 'Insecta', 'order': 'Diptera', 'family': 'Culicidae', 'genus': 'Anopheles', 'species': 'Anopheles arabiensis'}	Anopheles arabiensis
GTCTCCCTATGGGAGAGCTATCAGATG	GTCTCCCTATGGGAGAGCTATCAGATGTTAAGCTGATAAGAACAGATACTACACTTTGATCTTAGCCTTTAGAGATCGGA	GTCTCCCTATGGGAGAGCTATCAGATGTTAAGCTGATAAGAACAGATACTACACTTTGATCTTAGCCTTTAGGCAGATCGG	2	D2	TTAAGCTGATAAGATTGATCTTAGCCT	ACAGATACTACACTTTAGAGATCGGAA	0.333333	---------{------(--)------}----		0.0100308	U2 spliceosomal RNA	Anopheles arabiensis genome assembly, chromosome: 2	{'superkingdom': 'Eukaryota', 'phylum': 'Arthropoda', 'class': 'Insecta', 'order': 'Diptera', 'family': 'Culicidae', 'genus': 'Anopheles', 'species': 'Anopheles arabiensis'}	Anopheles arabiensis
GTCTCCCTATGGGAGAGCTATCAGATG	GTCTCCCTATGGGAGAGCTATCAGATGTTAAGCTGATAAGAACAGATACTACACTTTGATCTTAGCCTTTAGAGATCGGA	GTCTCCCTATGGGAGAGCTATCAGATGTTAAGCTGATAAGAACAGATACTACACTTTGATCTTAGTCAATAAGATGCCAAC	1	D2	TTAAGCTGATAAGATTGATCTTAGCCT	ACAGATACTACACTTTAGAGATCGGAA	0.166667	---------{------(--)------}-t-a		0.0100308	U2 spliceosomal RNA	Anopheles arabiensis genome assembly, chromosome: 2	{'superkingdom': 'Eukaryota', 'phylum': 'Arthropoda', 'class': 'Insecta', 'order': 'Diptera', 'family': 'Culicidae', 'genus': 'Anopheles', 'species': 'Anopheles arabiensis'}	Anopheles arabiensis
AGTCACCCATCTAAGTACTAATCGCGC	AGTCACCCATCTAAGTACTAATCGCGCCCGATGTTGCTTAACTTCGGTGATCGGACGAGAACCGGTGTTTTCAACAGATCG	AGTCACCCATCTAAGTACTAATCGCGCCCGATGTTGCTTAACTTCGGTGATCGGACGAGAACCGGTGTTTTCAAGATCGGA	5	D1	CCGATGTTGCTTAACTTCGGTGATCGGA	CGAGAACCGGTGTTTTCAACAGATCG	0.294118	{-----(-----------------)-----}-		0.010079	5S ribosomal RNA	PREDICTED: Uranotaenia lowii 5S ribosomal RNA (LOC129740736), rRNA	{'superkingdom': 'Eukaryota', 'phylum': 'Arthropoda', 'class': 'Insecta', 'order': 'Diptera', 'family': 'Culicidae', 'genus': 'Uranotaenia', 'species': 'Uranotaenia lowii'}	Uranotaenia lowii
AGTCACCCATCTAAGTACTAATCGCGC	AGTCACCCATCTAAGTACTAATCGCGCCCGATGTTGCTTAACTTCGGTGATCGGACGAGAACCGGTGTTTTCAACAGATCG	AGTCACCCATCTAAGTACTAATCGCGCCCGATGTTGCTTAACTTCAGTGATCGGACGAGAACTGGTGTTTTCAGATCGGAA	3	D1	CCGATGTTGCTTAACTTCGGTGATCGGA	CGAGAACCGGTGTTTTCAACAGATCG	0.176471	{-----(-------------a---)-----}-		0.010079	5S ribosomal RNA	PREDICTED: Uranotaenia lowii 5S ribosomal RNA (LOC129740736), rRNA	{'superkingdom': 'Eukaryota', 'phylum': 'Arthropoda', 'class': 'Insecta', 'order': 'Diptera', 'family': 'Culicidae', 'genus': 'Uranotaenia', 'species': 'Uranotaenia lowii'}	Uranotaenia lowii
AGTCACCCATCTAAGTACTAATCGCGC	AGTCACCCATCTAAGTACTAATCGCGCCCGATGTTGCTTAACTTCGGTGATCGGACGAGAACCGGTGTTTTCAACAGATCG	AGTCACCCATCTAAGTACTAATCGCGCCCGATGTTGCTTAACTTCGGTGATCGGACGAGAACCGGTGTTTTCAAAGATCGG	3	D1	CCGATGTTGCTTAACTTCGGTGATCGGA	CGAGAACCGGTGTTTTCAACAGATCG	0.176471	{-----(-----------------)-----}-		0.010079	5S ribosomal RNA	PREDICTED: Uranotaenia lowii 5S ribosomal RNA (LOC129740736), rRNA	{'superkingdom': 'Eukaryota', 'phylum': 'Arthropoda', 'class': 'Insecta', 'order': 'Diptera', 'family': 'Culicidae', 'genus': 'Uranotaenia', 'species': 'Uranotaenia lowii'}	Uranotaenia lowii
AGTCACCCATCTAAGTACTAATCGCGC	AGTCACCCATCTAAGTACTAATCGCGCCCGATGTTGCTTAACTTCGGTGATCGGACGAGAACCGGTGTTTTCAACAGATCG	AGTCACCCATCTAAGTACTAATCGCGCCCGATGTTGCTTAACTTCGGTGATCGGACGAGAACCGGTGTTTTCAACATGAGA	3	D1	CCGATGTTGCTTAACTTCGGTGATCGGA	CGAGAACCGGTGTTTTCAACAGATCG	0.176471	{-----(-----------------)-----}-		0.010079	5S ribosomal RNA	PREDICTED: Uranotaenia lowii 5S ribosomal RNA (LOC129740736), rRNA	{'superkingdom': 'Eukaryota', 'phylum': 'Arthropoda', 'class': 'Insecta', 'order': 'Diptera', 'family': 'Culicidae', 'genus': 'Uranotaenia', 'species': 'Uranotaenia lowii'}	Uranotaenia lowii
AGTCACCCATCTAAGTACTAATCGCGC	AGTCACCCATCTAAGTACTAATCGCGCCCGATGTTGCTTAACTTCGGTGATCGGACGAGAACCGGTGTTTTCAACAGATCG	AGTCACCCATCTAAGTACTAATCGCGCCCGATGTTGCTTAACTTCGGTGATCGGACGAGAACCGGTGTTTTCAACATGGTA	3	D1	CCGATGTTGCTTAACTTCGGTGATCGGA	CGAGAACCGGTGTTTTCAACAGATCG	0.176471	{-----(-----------------)-----}-		0.010079	5S ribosomal RNA	PREDICTED: Uranotaenia lowii 5S ribosomal RNA (LOC129740736), rRNA	{'superkingdom': 'Eukaryota', 'phylum': 'Arthropoda', 'class': 'Insecta', 'order': 'Diptera', 'family': 'Culicidae', 'genus': 'Uranotaenia', 'species': 'Uranotaenia lowii'}	Uranotaenia lowii
TCGTGTGTCCTGCAGTTCACATTCTGA	TCGTGTGTCCTGCAGTTCACATTCTGACGCGCATTTAGCTGCGGTCTTCATCGATCCACGAGCCGAGTGATCCCCAGATCG	TCGTGTGTCCTGCAGTTCACATTCTGACGCGCATTTAGCTGCGGTCTTCATCGATCCACGAGCCGAGTGATCCAGATCGGA	5	D2	CGCGCATTTAGCTGCCACGAGCCGAGT	CGGTCTTCATCGATGATCCCCAGATCG	0.3125		------{-----()-----}---ag-tcgga	0.0102114	5.8S ribosomal RNA	Culex tritaeniorhynchus clone C8726 18S ribosomal RNA gene, partial sequence; internal transcribed spacer 1, 5.8S ribosomal RNA gene, and internal transcribed spacer 2, complete sequence; and 28S ribosomal RNA gene, partial sequence	{'superkingdom': 'Eukaryota', 'phylum': 'Arthropoda', 'class': 'Insecta', 'order': 'Diptera', 'family': 'Culicidae', 'genus': 'Culex', 'species': 'Culex tritaeniorhynchus'}	Culex tritaeniorhynchus
TCGTGTGTCCTGCAGTTCACATTCTGA	TCGTGTGTCCTGCAGTTCACATTCTGACGCGCATTTAGCTGCGGTCTTCATCGATCCACGAGCCGAGTGATCCCCAGATCG	TCGTGTGTCCTGCAGTTCACATTCTGACGCGCATTTAGCTGCGGTCTTCATCGATCCACGAGCCGAGTGATCCCAGATCGG	3	D2	CGCGCATTTAGCTGCCACGAGCCGAGT	CGGTCTTCATCGATGATCCCCAGATCG	0.1875		------{-----()-----}----agatcg-	0.0102114	5.8S ribosomal RNA	Culex tritaeniorhynchus clone C8726 18S ribosomal RNA gene, partial sequence; internal transcribed spacer 1, 5.8S ribosomal RNA gene, and internal transcribed spacer 2, complete sequence; and 28S ribosomal RNA gene, partial sequence	{'superkingdom': 'Eukaryota', 'phylum': 'Arthropoda', 'class': 'Insecta', 'order': 'Diptera', 'family': 'Culicidae', 'genus': 'Culex', 'species': 'Culex tritaeniorhynchus'}	Culex tritaeniorhynchus
TCGTGTGTCCTGCAGTTCACATTCTGA	TCGTGTGTCCTGCAGTTCACATTCTGACGCGCATTTAGCTGCGGTCTTCATCGATCCACGAGCCGAGTGATCCCCAGATCG	TCGTGTGTCCTGCAGTTCACATTCTGACGCGCATTTAGCTGCGGTCTTCATCGATCCACGAGCCGAGTGATAGATCGGAAG	2	D2	CGCGCATTTAGCTGCCACGAGCCGAGT	CGGTCTTCATCGATGATCCCCAGATCG	0.125		------{-----()-----}-agatc-gaa-	0.0102114	5.8S ribosomal RNA	Culex tritaeniorhynchus clone C8726 18S ribosomal RNA gene, partial sequence; internal transcribed spacer 1, 5.8S ribosomal RNA gene, and internal transcribed spacer 2, complete sequence; and 28S ribosomal RNA gene, partial sequence	{'superkingdom': 'Eukaryota', 'phylum': 'Arthropoda', 'class': 'Insecta', 'order': 'Diptera', 'family': 'Culicidae', 'genus': 'Culex', 'species': 'Culex tritaeniorhynchus'}	Culex tritaeniorhynchus
TCGTGTGTCCTGCAGTTCACATTCTGA	TCGTGTGTCCTGCAGTTCACATTCTGACGCGCATTTAGCTGCGGTCTTCATCGATCCACGAGCCGAGTGATCCCCAGATCG	TCGTGTGTCCTGCAGTTCACATTCTGACGCGCATTTAGCTGCGGTCTTCATCGATCCACGAGCCGAGTGATCAGATCGGAA	2	D2	CGCGCATTTAGCTGCCACGAGCCGAGT	CGGTCTTCATCGATGATCCCCAGATCG	0.125		------{-----()-----}--agatcggaa	0.0102114	5.8S ribosomal RNA	Culex tritaeniorhynchus clone C8726 18S ribosomal RNA gene, partial sequence; internal transcribed spacer 1, 5.8S ribosomal RNA gene, and internal transcribed spacer 2, complete sequence; and 28S ribosomal RNA gene, partial sequence	{'superkingdom': 'Eukaryota', 'phylum': 'Arthropoda', 'class': 'Insecta', 'order': 'Diptera', 'family': 'Culicidae', 'genus': 'Culex', 'species': 'Culex tritaeniorhynchus'}	Culex tritaeniorhynchus
TCGTGTGTCCTGCAGTTCACATTCTGA	TCGTGTGTCCTGCAGTTCACATTCTGACGCGCATTTAGCTGCGGTCTTCATCGATCCACGAGCCGAGTGATCCCCAGATCG	TCGTGTGTCCTGCAGTTCACATTCTGACGCGCATTTAGCTGCGGTCTTCATCGATCCACGAGCCGAGTGATCCCCTGCCAG	2	D2	CGCGCATTTAGCTGCCACGAGCCGAGT	CGGTCTTCATCGATGATCCCCAGATCG	0.125		------{-----()-----}-----t-cca-	0.0102114	5.8S ribosomal RNA	Culex tritaeniorhynchus clone C8726 18S ribosomal RNA gene, partial sequence; internal transcribed spacer 1, 5.8S ribosomal RNA gene, and internal transcribed spacer 2, complete sequence; and 28S ribosomal RNA gene, partial sequence	{'superkingdom': 'Eukaryota', 'phylum': 'Arthropoda', 'class': 'Insecta', 'order': 'Diptera', 'family': 'Culicidae', 'genus': 'Culex', 'species': 'Culex tritaeniorhynchus'}	Culex tritaeniorhynchus
TCGTGTGTCCTGCAGTTCACATTCTGA	TCGTGTGTCCTGCAGTTCACATTCTGACGCGCATTTAGCTGCGGTCTTCATCGATCCACGAGCCGAGTGATCCCCAGATCG	TCGTGTGTCCTGCAGTTCACATTCTGACGCGCATTTAGCTGCGGTCTTCATCGATCCACGAGCCGAGTGATCCCCTGCCTA	2	D2	CGCGCATTTAGCTGCCACGAGCCGAGT	CGGTCTTCATCGATGATCCCCAGATCG	0.125		------{-----()-----}-----t-ccta	0.0102114	5.8S ribosomal RNA	Culex tritaeniorhynchus clone C8726 18S ribosomal RNA gene, partial sequence; internal transcribed spacer 1, 5.8S ribosomal RNA gene, and internal transcribed spacer 2, complete sequence; and 28S ribosomal RNA gene, partial sequence	{'superkingdom': 'Eukaryota', 'phylum': 'Arthropoda', 'class': 'Insecta', 'order': 'Diptera', 'family': 'Culicidae', 'genus': 'Culex', 'species': 'Culex tritaeniorhynchus'}	Culex tritaeniorhynchus
TAGTGGAGCTGGAATTACCGCGGATGC	TAGTGGAGCTGGAATTACCGCGGATGCTGGCACCAGACTTGCCCTCCACTTGATCCTTACCGAAGGATTTATGCTCGGTTC	TAGTGGAGCTGGAATTACCGCGGATGCTGGCACCAGACTTGCCCTCCACTTGATCCTTGTTGAAGGATTTATGCTCAACTC	2	D1	TGGCACCAGACTTGCCCTCCACTTGATC	CTTACCGAAGGATTTATGCTCGGTTC	0.2		---{GTT--(-----------)--AAC}--	0.0102545	18S ribosomal RNA	Culex tritaeniorhynchus isolate MG_S115 small subunit ribosomal RNA, partial sequence	{'superkingdom': 'Eukaryota', 'phylum': 'Arthropoda', 'class': 'Insecta', 'order': 'Diptera', 'family': 'Culicidae', 'genus': 'Culex', 'species': 'Culex tritaeniorhynchus'}	Culex tritaeniorhynchus
TAGTGGAGCTGGAATTACCGCGGATGC	TAGTGGAGCTGGAATTACCGCGGATGCTGGCACCAGACTTGCCCTCCACTTGATCCTTACCGAAGGATTTATGCTCGGTTC	TAGTGGAGCTGGAATTACCGCGGATGCAGGCACCAGACTTTCCCTCCACGTGATCCTTGTTGAAGGATTTATGCTCAACTC	1	D1	TGGCACCAGACTTGCCCTCCACTTGATC	CTTACCGAAGGATTTATGCTCGGTTC	0.1		---{GTT--(-----------)--AAC}--	0.0102545	18S ribosomal RNA	Culex tritaeniorhynchus isolate MG_S115 small subunit ribosomal RNA, partial sequence	{'superkingdom': 'Eukaryota', 'phylum': 'Arthropoda', 'class': 'Insecta', 'order': 'Diptera', 'family': 'Culicidae', 'genus': 'Culex', 'species': 'Culex tritaeniorhynchus'}	Culex tritaeniorhynchus
TAGTGGAGCTGGAATTACCGCGGATGC	TAGTGGAGCTGGAATTACCGCGGATGCTGGCACCAGACTTGCCCTCCACTTGATCCTTACCGAAGGATTTATGCTCGGTTC	TAGTGGAGCTGGAATTACCGCGGATGCAGTCACCAGACTTGCCCTCCAATTGAACATTGAAGAAGGATTAATGATAAACTC	1	D1	TGGCACCAGACTTGCCCTCCACTTGATC	CTTACCGAAGGATTTATGCTCGGTTC	0.1		a--{Gaa--(------a---a)-aaaC}--	0.0102545	18S ribosomal RNA	Culex tritaeniorhynchus isolate MG_S115 small subunit ribosomal RNA, partial sequence	{'superkingdom': 'Eukaryota', 'phylum': 'Arthropoda', 'class': 'Insecta', 'order': 'Diptera', 'family': 'Culicidae', 'genus': 'Culex', 'species': 'Culex tritaeniorhynchus'}	Culex tritaeniorhynchus
TAGTGGAGCTGGAATTACCGCGGATGC	TAGTGGAGCTGGAATTACCGCGGATGCTGGCACCAGACTTGCCCTCCACTTGATCCTTACCGAAGGATTTATGCTCGGTTC	TAGTGGAGCTGGAATTACCGCGGATGCTGGAACAAGACTTGCAATCCACTTGAACCTTGTTGAAGGATTTATTCTCAAAAA	1	D1	TGGCACCAGACTTGCCCTCCACTTGATC	CTTACCGAAGGATTTATGCTCGGTTC	0.1		---{gTT--(---------t-)--AAa}aa	0.0102545		Culex tritaeniorhynchus isolate MG_S115 small subunit ribosomal RNA, partial sequence	{'superkingdom': 'Eukaryota', 'phylum': 'Arthropoda', 'class': 'Insecta', 'order': 'Diptera', 'family': 'Culicidae', 'genus': 'Culex', 'species': 'Culex tritaeniorhynchus'}	Culex tritaeniorhynchus
TAGTGGAGCTGGAATTACCGCGGATGC	TAGTGGAGCTGGAATTACCGCGGATGCTGGCACCAGACTTGCCCTCCACTTGATCCTTACCGAAGGATTTATGCTCGGTTC	TAGTGGAGCTGGAATTACCGCGGATGCTGGCACCAGACAAGCCCTCAAATTGATCCTTACCGAAGGATTTATGCTCGGTTC	1	D1	TGGCACCAGACTTGCCCTCCACTTGATC	CTTACCGAAGGATTTATGCTCGGTTC	0.1		---{-----(-----------)-----}--	0.0102545	18S ribosomal RNA	Culex tritaeniorhynchus isolate MG_S115 small subunit ribosomal RNA, partial sequence	{'superkingdom': 'Eukaryota', 'phylum': 'Arthropoda', 'class': 'Insecta', 'order': 'Diptera', 'family': 'Culicidae', 'genus': 'Culex', 'species': 'Culex tritaeniorhynchus'}	Culex tritaeniorhynchus
TAGTGGAGCTGGAATTACCGCGGATGC	TAGTGGAGCTGGAATTACCGCGGATGCTGGCACCAGACTTGCCCTCCACTTGATCCTTACCGAAGGATTTATGCTCGGTTC	TAGTGGAGCTGGAATTACCGCGGATGCTGGCACCAGACTATCCAACAACTTGATACTTACCGAAGGACTTAAGCTCGGAAC	1	D1	TGGCACCAGACTTGCCCTCCACTTGATC	CTTACCGAAGGATTTATGCTCGGTTC	0.1		---{-----(----c---a--)----a}a-	0.0102545		Culex tritaeniorhynchus isolate MG_S115 small subunit ribosomal RNA, partial sequence	{'superkingdom': 'Eukaryota', 'phylum': 'Arthropoda', 'class': 'Insecta', 'order': 'Diptera', 'family': 'Culicidae', 'genus': 'Culex', 'species': 'Culex tritaeniorhynchus'}	Culex tritaeniorhynchus
TAGTGGAGCTGGAATTACCGCGGATGC	TAGTGGAGCTGGAATTACCGCGGATGCTGGCACCAGACTTGCCCTCCACTTGATCCTTACCGAAGGATTTATGCTCGGTTC	TAGTGGAGCTGGAATTACCGCGGATGCTGGCACCAGACTTGCCCTCCACTTGATAATTATATAAGGATTTATGCTCGTTTC	1	D1	TGGCACCAGACTTGCCCTCCACTTGATC	CTTACCGAAGGATTTATGCTCGGTTC	0.1		a--{-tat-(-----------)---t-}--	0.0102545	18S ribosomal RNA	Culex tritaeniorhynchus isolate MG_S115 small subunit ribosomal RNA, partial sequence	{'superkingdom': 'Eukaryota', 'phylum': 'Arthropoda', 'class': 'Insecta', 'order': 'Diptera', 'family': 'Culicidae', 'genus': 'Culex', 'species': 'Culex tritaeniorhynchus'}	Culex tritaeniorhynchus
TAGTGGAGCTGGAATTACCGCGGATGC	TAGTGGAGCTGGAATTACCGCGGATGCTGGCACCAGACTTGCCCTCCACTTGATCCTTACCGAAGGATTTATGCTCGGTTC	TAGTGGAGCTGGAATTACCGCGGATGCTGGCACCAGACTTGCCCTCCACTTGATACATGTTGAAGGATTTATGCTAAACTC	1	D1	TGGCACCAGACTTGCCCTCCACTTGATC	CTTACCGAAGGATTTATGCTCGGTTC	0.1		-a-{GTT--(-----------)-aAAC}--	0.0102545	18S ribosomal RNA	Culex tritaeniorhynchus isolate MG_S115 small subunit ribosomal RNA, partial sequence	{'superkingdom': 'Eukaryota', 'phylum': 'Arthropoda', 'class': 'Insecta', 'order': 'Diptera', 'family': 'Culicidae', 'genus': 'Culex', 'species': 'Culex tritaeniorhynchus'}	Culex tritaeniorhynchus
TAGTGGAGCTGGAATTACCGCGGATGC	TAGTGGAGCTGGAATTACCGCGGATGCTGGCACCAGACTTGCCCTCCACTTGATCCTTACCGAAGGATTTATGCTCGGTTC	TAGTGGAGCTGGAATTACCGCGGATGCTGTCACCAGACTAGCCATCCACTTGATCCTTGTTGAATGATTTATGATCAACTC	1	D1	TGGCACCAGACTTGCCCTCCACTTGATC	CTTACCGAAGGATTTATGCTCGGTTC	0.1		---{GTT--(-t--------a)--AAC}--	0.0102545	18S ribosomal RNA	Culex tritaeniorhynchus isolate MG_S115 small subunit ribosomal RNA, partial sequence	{'superkingdom': 'Eukaryota', 'phylum': 'Arthropoda', 'class': 'Insecta', 'order': 'Diptera', 'family': 'Culicidae', 'genus': 'Culex', 'species': 'Culex tritaeniorhynchus'}	Culex tritaeniorhynchus
TTCATGTGTCCTGCAGTTCACATTATG	TTCATGTGTCCTGCAGTTCACATTATGACGCGCATTTAGCTGCGGTCTTCATCGATCCACGAGCCGAGTGATCCAGATCGG	TTCATGTGTCCTGCAGTTCACATTATGACGCGCATTTAGCTGCGGTCTTCATCGATCCACGAGCCGAGTGATCCCCAGATC	8	D2	ACGCGCATTTAGCTTCCACGAGCCGAG	GCGGTCTTCATCGATGATCCAGATCGG	0.4		-------{-----()-----}---cc-gatc	0.0102932	5.8S ribosomal RNA	Anopheles sinensis isolate 1 5.8S ribosomal RNA gene, partial sequence; internal transcribed spacer 2, complete sequence; and 28S ribosomal RNA gene, partial sequence	{'superkingdom': 'Eukaryota', 'phylum': 'Arthropoda', 'class': 'Insecta', 'order': 'Diptera', 'family': 'Culicidae', 'genus': 'Anopheles', 'species': 'Anopheles sinensis'}	Anopheles sinensis
TTCATGTGTCCTGCAGTTCACATTATG	TTCATGTGTCCTGCAGTTCACATTATGACGCGCATTTAGCTGCGGTCTTCATCGATCCACGAGCCGAGTGATCCAGATCGG	TTCATGTGTCCTGCAGTTCACATTATGACGCGCATTTAGCTGCGGTCTTCATCGATCCACGAGCCGAGTGATCCCCTGAGA	5	D2	ACGCGCATTTAGCTTCCACGAGCCGAG	GCGGTCTTCATCGATGATCCAGATCGG	0.25		-------{-----()-----}---cctga-a	0.0102932	5.8S ribosomal RNA	Anopheles sinensis isolate 1 5.8S ribosomal RNA gene, partial sequence; internal transcribed spacer 2, complete sequence; and 28S ribosomal RNA gene, partial sequence	{'superkingdom': 'Eukaryota', 'phylum': 'Arthropoda', 'class': 'Insecta', 'order': 'Diptera', 'family': 'Culicidae', 'genus': 'Anopheles', 'species': 'Anopheles sinensis'}	Anopheles sinensis
TTCATGTGTCCTGCAGTTCACATTATG	TTCATGTGTCCTGCAGTTCACATTATGACGCGCATTTAGCTGCGGTCTTCATCGATCCACGAGCCGAGTGATCCAGATCGG	TTCATGTGTCCTGCAGTTCACATTATGACGCGCATTTAGCTGCGGTCTTCATCGATCCACGAGCCGAGTGATCCCAGATCG	4	D2	ACGCGCATTTAGCTTCCACGAGCCGAG	GCGGTCTTCATCGATGATCCAGATCGG	0.2		-------{-----()-----}---cagatc-	0.0102932	5.8S ribosomal RNA	Anopheles sinensis isolate 1 5.8S ribosomal RNA gene, partial sequence; internal transcribed spacer 2, complete sequence; and 28S ribosomal RNA gene, partial sequence	{'superkingdom': 'Eukaryota', 'phylum': 'Arthropoda', 'class': 'Insecta', 'order': 'Diptera', 'family': 'Culicidae', 'genus': 'Anopheles', 'species': 'Anopheles sinensis'}	Anopheles sinensis
TTCATGTGTCCTGCAGTTCACATTATG	TTCATGTGTCCTGCAGTTCACATTATGACGCGCATTTAGCTGCGGTCTTCATCGATCCACGAGCCGAGTGATCCAGATCGG	TTCATGTGTCCTGCAGTTCACATTATGACGCGCATTTAGCTGCGGTCTTCATCGATCCACGAGCCGAGTGAGATCGGAAGA	3	D2	ACGCGCATTTAGCTTCCACGAGCCGAG	GCGGTCTTCATCGATGATCCAGATCGG	0.15		-------{-----()-----}gatc-gaa-a	0.0102932	5.8S ribosomal RNA	Anopheles sinensis isolate 1 5.8S ribosomal RNA gene, partial sequence; internal transcribed spacer 2, complete sequence; and 28S ribosomal RNA gene, partial sequence	{'superkingdom': 'Eukaryota', 'phylum': 'Arthropoda', 'class': 'Insecta', 'order': 'Diptera', 'family': 'Culicidae', 'genus': 'Anopheles', 'species': 'Anopheles sinensis'}	Anopheles sinensis
AGAGGATCGAAGGCGATTAGATACCGC	AGAGGATCGAAGGCGATTAGATACCGCCCTAGTTCTAACCGTAAACTATGCCAATTAGCAATTGGGAGACGCTACATTAT	AGAGGATCGAAGGCGATTAGATACCGCCCTAGTTCTAACCGTAAACTATGCCAATTAGCAATTGGGAGACAGATCGGAAGA	9	D3	CCTAGTTCTAACCGACGCTACATTATG	TAAACTATGCCAATTAGCAATTGGGAG	0.36		---------{------(---)------}---	0.0103655	18S ribosomal RNA	PREDICTED: Ochlerotatus camptorhynchus small subunit ribosomal RNA (LOC135717040), rRNA	{'superkingdom': 'Eukaryota', 'phylum': 'Arthropoda', 'class': 'Insecta', 'order': 'Diptera', 'family': 'Culicidae', 'genus': 'Ochlerotatus', 'species': 'Ochlerotatus camptorhynchus'}	Ochlerotatus camptorhynchus
AGAGGATCGAAGGCGATTAGATACCGC	AGAGGATCGAAGGCGATTAGATACCGCCCTAGTTCTAACCGTAAACTATGCCAATTAGCAATTGGGAGACGCTACATTAT	AGAGGATCGAAGGCGATTAGATACCGCCCTAGTTCTAACCGTAAACTATGCCAATTAGCAATTGGGAGACGCTAGATCGGA	9	D3	CCTAGTTCTAACCGACGCTACATTATG	TAAACTATGCCAATTAGCAATTGGGAG	0.36		---------{------(---)------}---	0.0103655	18S ribosomal RNA	PREDICTED: Ochlerotatus camptorhynchus small subunit ribosomal RNA (LOC135717040), rRNA	{'superkingdom': 'Eukaryota', 'phylum': 'Arthropoda', 'class': 'Insecta', 'order': 'Diptera', 'family': 'Culicidae', 'genus': 'Ochlerotatus', 'species': 'Ochlerotatus camptorhynchus'}	Ochlerotatus camptorhynchus
AGAGGATCGAAGGCGATTAGATACCGC	AGAGGATCGAAGGCGATTAGATACCGCCCTAGTTCTAACCGTAAACTATGCCAATTAGCAATTGGGAGACGCTACATTAT	AGAGGATCGAAGGCGATTAGATACCGCCCTAGTTCTAACCGTAAACTATGCCAATTAGCAATTGGGAGACGAGATCGGAAG	7	D3	CCTAGTTCTAACCGACGCTACATTATG	TAAACTATGCCAATTAGCAATTGGGAG	0.28		---------{------(---)------}---	0.0103655	18S ribosomal RNA	PREDICTED: Ochlerotatus camptorhynchus small subunit ribosomal RNA (LOC135717040), rRNA	{'superkingdom': 'Eukaryota', 'phylum': 'Arthropoda', 'class': 'Insecta', 'order': 'Diptera', 'family': 'Culicidae', 'genus': 'Ochlerotatus', 'species': 'Ochlerotatus camptorhynchus'}	Ochlerotatus camptorhynchus
CCTGTGGTGCTTCAGCTTGCCGTAGTT	CCTGTGGTGCTTCAGCTTGCCGTAGTTGATGGTGTAGAAGAAGACCATGCCACCGACGATGACCTGGAAGAACGGGGCAAT	CCTGTGGTGCTTCAGCTTGCCGTAGTTGATGGTGTAGAAGAAGACCATGCCACCGACGATGACCTGGAAGAACGGAGCGAT	14	D1	GATGGTGTAGAAGAAGACCATGCCACCG	ACGATGACCTGGAAGAACGGGGCAAT	0.736842	-{-----(----------)-----}-------		0.0103769	Sphinx conserved region 2	PREDICTED: Culex pipiens pallens putative ATP synthase subunit f, mitochondrial (LOC120416219), mRNA	{'superkingdom': 'Eukaryota', 'phylum': 'Arthropoda', 'class': 'Insecta', 'order': 'Diptera', 'family': 'Culicidae', 'genus': 'Culex', 'species': 'Culex pipiens'}	Culex pipiens
CCTGTGGTGCTTCAGCTTGCCGTAGTT	CCTGTGGTGCTTCAGCTTGCCGTAGTTGATGGTGTAGAAGAAGACCATGCCACCGACGATGACCTGGAAGAACGGGGCAAT	CCTGTGGTGCTTCAGCTTGCCGTAGTTGATGGCGTAGAAGAAGGCCATTCCACCGACGATGACCTGGAAGAAGGGGGCGAT	3	D1	GATGGTGTAGAAGAAGACCATGCCACCG	ACGATGACCTGGAAGAACGGGGCAAT	0.157895	-{----C(----------)G----}t------		0.0103769	Sphinx conserved region 2	PREDICTED: Culex pipiens pallens putative ATP synthase subunit f, mitochondrial (LOC120416219), mRNA	{'superkingdom': 'Eukaryota', 'phylum': 'Arthropoda', 'class': 'Insecta', 'order': 'Diptera', 'family': 'Culicidae', 'genus': 'Culex', 'species': 'Culex pipiens'}	Culex pipiens
CCTGTGGTGCTTCAGCTTGCCGTAGTT	CCTGTGGTGCTTCAGCTTGCCGTAGTTGATGGTGTAGAAGAAGACCATGCCACCGACGATGACCTGGAAGAACGGGGCAAT	CCTGTGGTGCTTCAGCTTGCCGTAGTTGATGGCGTAGAAGAACACCATTCCTCCGACGATGACCTGGAAGAACGGGGCAAT	2	D1	GATGGTGTAGAAGAAGACCATGCCACCG	ACGATGACCTGGAAGAACGGGGCAAT	0.105263	-{----c(---------c)-----}t--t---		0.0103769	Sphinx conserved region 2	PREDICTED: Culex pipiens pallens putative ATP synthase subunit f, mitochondrial (LOC120416219), mRNA	{'superkingdom': 'Eukaryota', 'phylum': 'Arthropoda', 'class': 'Insecta', 'order': 'Diptera', 'family': 'Culicidae', 'genus': 'Culex', 'species': 'Culex pipiens'}	Culex pipiens
AGTGGAGCTGGAATTCCCGCGGCTGCT	AGTGGAGCTGGAATTCCCGCGGCTGCTGGCACCAGACTTGCCCTCCACTTGATCCTTGTTGAAGGATTTATGCTCAACTCA	AGTGGAGCTGGAATTCCCGCGGCTGCTGGCACCAGACTTGCCCTCCACTTGATCCTTACCGAAGGATTTATGCTCGGTTCA	3	D1	GGCACCAGACTTGCCCTCCACTTGATCC	TTGTTGAAGGATTTATGCTCAACTCA	0.428571		--{ACC--(-----------)--GGT}---	0.0103899	18S ribosomal RNA	Aedes notoscriptus isolate MI1108 nuclear ribosomal DNA repeat unit genomic sequence	{'superkingdom': 'Eukaryota', 'phylum': 'Arthropoda', 'class': 'Insecta', 'order': 'Diptera', 'family': 'Culicidae', 'genus': 'Aedes', 'species': 'Aedes notoscriptus'}	Aedes notoscriptus
AGTGGAGCTGGAATTCCCGCGGCTGCT	AGTGGAGCTGGAATTCCCGCGGCTGCTGGCACCAGACTTGCCCTCCACTTGATCCTTGTTGAAGGATTTATGCTCAACTCA	AGTGGAGCTGGAATTCCCGCGGCTGCTGGCACCAGACTACACCACCACTAGATCCTAAACGAAGCAATTATGAACGGTACA	1	D1	GGCACCAGACTTGCCCTCCACTTGATCC	TTGTTGAAGGATTTATGCTCAACTCA	0.142857		-a{AaC--(--c-a-----a)a-GgT}a--	0.0103899		Aedes notoscriptus isolate MI1108 nuclear ribosomal DNA repeat unit genomic sequence	{'superkingdom': 'Eukaryota', 'phylum': 'Arthropoda', 'class': 'Insecta', 'order': 'Diptera', 'family': 'Culicidae', 'genus': 'Aedes', 'species': 'Aedes notoscriptus'}	Aedes notoscriptus
AGTGGAGCTGGAATTCCCGCGGCTGCT	AGTGGAGCTGGAATTCCCGCGGCTGCTGGCACCAGACTTGCCCTCCACTTGATCCTTGTTGAAGGATTTATGCTCAACTCA	AGTGGAGCTGGAATTCCCGCGGCTGCTGGCACCAGACTTGCCCTCCACTTGATCCTTGATGAAGTATGTAGGCTCAACTCA	1	D1	GGCACCAGACTTGCCCTCCACTTGATCC	TTGTTGAAGGATTTATGCTCAACTCA	0.142857		--{-a---(--t--g--g--)-----}---	0.0103899	18S ribosomal RNA	Aedes notoscriptus isolate MI1108 nuclear ribosomal DNA repeat unit genomic sequence	{'superkingdom': 'Eukaryota', 'phylum': 'Arthropoda', 'class': 'Insecta', 'order': 'Diptera', 'family': 'Culicidae', 'genus': 'Aedes', 'species': 'Aedes notoscriptus'}	Aedes notoscriptus
AGTGGAGCTGGAATTCCCGCGGCTGCT	AGTGGAGCTGGAATTCCCGCGGCTGCTGGCACCAGACTTGCCCTCCACTTGATCCTTGTTGAAGGATTTATGCTCAACTCA	AGTGGAGCTGGAATTCCCGCGGCTGCTGGCACCAGACTTTCCCTCCAATTTATCCTTACCGAAGGATTTATGCTCGGTTCA	1	D1	GGCACCAGACTTGCCCTCCACTTGATCC	TTGTTGAAGGATTTATGCTCAACTCA	0.142857		--{ACC--(-----------)--GGT}---	0.0103899	18S ribosomal RNA	Aedes notoscriptus isolate MI1108 nuclear ribosomal DNA repeat unit genomic sequence	{'superkingdom': 'Eukaryota', 'phylum': 'Arthropoda', 'class': 'Insecta', 'order': 'Diptera', 'family': 'Culicidae', 'genus': 'Aedes', 'species': 'Aedes notoscriptus'}	Aedes notoscriptus
AGTGGAGCTGGAATTCCCGCGGCTGCT	AGTGGAGCTGGAATTCCCGCGGCTGCTGGCACCAGACTTGCCCTCCACTTGATCCTTGTTGAAGGATTTATGCTCAACTCA	AGTGGAGCTGGAATTCCCGCGGCTGCTGGCACCATACTAGCCCTCCACTAGATCCTAATTGAAGGATTTATGATCAACTAA	1	D1	GGCACCAGACTTGCCCTCCACTTGATCC	TTGTTGAAGGATTTATGCTCAACTCA	0.142857		-a{a----(----------a)-----}-a-	0.0103899	18S ribosomal RNA	Aedes notoscriptus isolate MI1108 nuclear ribosomal DNA repeat unit genomic sequence	{'superkingdom': 'Eukaryota', 'phylum': 'Arthropoda', 'class': 'Insecta', 'order': 'Diptera', 'family': 'Culicidae', 'genus': 'Aedes', 'species': 'Aedes notoscriptus'}	Aedes notoscriptus
ACCGCGGCTGCTGTCACAAGACTTGCC	ACCGCGGCTGCTGTCACAAGACTTGCCCTCCACTTGATCCTTACCGAAGGATTTATGCTCGGTTCATTCCAATTATAAAAC	ACCGCGGCTGCTGTCACAAGACTTGCCCTCCACTTGATCCTTGTTGAAGGATTTATGCTCAACTCATTCCAATTATAAGAC	4	D3	CTCCACTTGATCCTCCAATTATAAAAC	TACCGAAGGATTTATGCTCGGTTCATT	0.666667		-{GTT--(-----------)--AAC}-----	0.0104092	18S ribosomal RNA	Culex tritaeniorhynchus isolate MG_S115 small subunit ribosomal RNA, partial sequence	{'superkingdom': 'Eukaryota', 'phylum': 'Arthropoda', 'class': 'Insecta', 'order': 'Diptera', 'family': 'Culicidae', 'genus': 'Culex', 'species': 'Culex tritaeniorhynchus'}	Culex tritaeniorhynchus
ACCGCGGCTGCTGTCACAAGACTTGCC	ACCGCGGCTGCTGTCACAAGACTTGCCCTCCACTTGATCCTTACCGAAGGATTTATGCTCGGTTCATTCCAATTATAAAAC	ACCGCGGCTGCTGTCACAAGACTTGCCCACCACATGATACTTACCGAAGGGTTTAAGCTCGCTTCATTACAAATCTAAAAC	1	D3	CTCCACTTGATCCTCCAATTATAAAAC	TACCGAAGGATTTATGCTCGGTTCATT	0.166667		-{-----(---g----a--)---c-}-----	0.0104092		Culex tritaeniorhynchus isolate MG_S115 small subunit ribosomal RNA, partial sequence	{'superkingdom': 'Eukaryota', 'phylum': 'Arthropoda', 'class': 'Insecta', 'order': 'Diptera', 'family': 'Culicidae', 'genus': 'Culex', 'species': 'Culex tritaeniorhynchus'}	Culex tritaeniorhynchus
ACCGCGGCTGCTGTCACAAGACTTGCC	ACCGCGGCTGCTGTCACAAGACTTGCCCTCCACTTGATCCTTACCGAAGGATTTATGCTCGGTTCATTCCAATTATAAAAC	ACCGCGGCTGCTGTCACAAGACTTGCCCTCAACTTTATCCTAGTTGAAGGATTTATGATCAACTCATACCAATTATAAGAC	1	D3	CTCCACTTGATCCTCCAATTATAAAAC	TACCGAAGGATTTATGCTCGGTTCATT	0.166667		a{GTT--(----------a)--AAC}----a	0.0104092		Culex tritaeniorhynchus isolate MG_S115 small subunit ribosomal RNA, partial sequence	{'superkingdom': 'Eukaryota', 'phylum': 'Arthropoda', 'class': 'Insecta', 'order': 'Diptera', 'family': 'Culicidae', 'genus': 'Culex', 'species': 'Culex tritaeniorhynchus'}	Culex tritaeniorhynchus
AGGTCACCCATCTAAGTACTAATCGCG	AGGTCACCCATCTAAGTACTAATCGCGCCCGATGTTGCTTAACTTCGGTGATCGGACGAGAACCGGTGTTTTCAACAGATC	AGGTCACCCATCTAAGTACTAATCGCGCCCGATGTTGCTTAACTTCGGTGATCGGACGAGAACCGGTGTTTTCAAGATCGG	27	D1	CCCGATGTTGCTTAACTTCGGTGATCGG	ACGAGAACCGGTGTTTTCAACAGATC	0.293478	-{-----(-----------------)-----}		0.0106	5S ribosomal RNA	PREDICTED: Uranotaenia lowii 5S ribosomal RNA (LOC129740736), rRNA	{'superkingdom': 'Eukaryota', 'phylum': 'Arthropoda', 'class': 'Insecta', 'order': 'Diptera', 'family': 'Culicidae', 'genus': 'Uranotaenia', 'species': 'Uranotaenia lowii'}	Uranotaenia lowii
AGGTCACCCATCTAAGTACTAATCGCG	AGGTCACCCATCTAAGTACTAATCGCGCCCGATGTTGCTTAACTTCGGTGATCGGACGAGAACCGGTGTTTTCAACAGATC	AGGTCACCCATCTAAGTACTAATCGCGCCCGATGTTGCTTAACTTCAGTGATCGGACGAGAACTGGTGTTTTCAACAGATC	26	D1	CCCGATGTTGCTTAACTTCGGTGATCGG	ACGAGAACCGGTGTTTTCAACAGATC	0.282609	-{-----(-------------a---)-----}		0.0106	5S ribosomal RNA	PREDICTED: Uranotaenia lowii 5S ribosomal RNA (LOC129740736), rRNA	{'superkingdom': 'Eukaryota', 'phylum': 'Arthropoda', 'class': 'Insecta', 'order': 'Diptera', 'family': 'Culicidae', 'genus': 'Uranotaenia', 'species': 'Uranotaenia lowii'}	Uranotaenia lowii
AGGTCACCCATCTAAGTACTAATCGCG	AGGTCACCCATCTAAGTACTAATCGCGCCCGATGTTGCTTAACTTCGGTGATCGGACGAGAACCGGTGTTTTCAACAGATC	AGGTCACCCATCTAAGTACTAATCGCGCCCGATGTTGCTTAACTTCAGTGATCGGACGAGAACTGGTGTTTTCAAGATCGG	19	D1	CCCGATGTTGCTTAACTTCGGTGATCGG	ACGAGAACCGGTGTTTTCAACAGATC	0.206522	-{-----(-------------a---)-----}		0.0106	5S ribosomal RNA	PREDICTED: Uranotaenia lowii 5S ribosomal RNA (LOC129740736), rRNA	{'superkingdom': 'Eukaryota', 'phylum': 'Arthropoda', 'class': 'Insecta', 'order': 'Diptera', 'family': 'Culicidae', 'genus': 'Uranotaenia', 'species': 'Uranotaenia lowii'}	Uranotaenia lowii
AGGTCACCCATCTAAGTACTAATCGCG	AGGTCACCCATCTAAGTACTAATCGCGCCCGATGTTGCTTAACTTCGGTGATCGGACGAGAACCGGTGTTTTCAACAGATC	AGGTCACCCATCTAAGTACTAATCGCGCCCGATGTTGCTTAACTTCAGTGATCGGACGAGAACTGGTGTTTTCAGATCGGA	10	D1	CCCGATGTTGCTTAACTTCGGTGATCGG	ACGAGAACCGGTGTTTTCAACAGATC	0.108696	-{-----(-------------a---)-----}		0.0106	5S ribosomal RNA	PREDICTED: Uranotaenia lowii 5S ribosomal RNA (LOC129740736), rRNA	{'superkingdom': 'Eukaryota', 'phylum': 'Arthropoda', 'class': 'Insecta', 'order': 'Diptera', 'family': 'Culicidae', 'genus': 'Uranotaenia', 'species': 'Uranotaenia lowii'}	Uranotaenia lowii
AGGTCACCCATCTAAGTACTAATCGCG	AGGTCACCCATCTAAGTACTAATCGCGCCCGATGTTGCTTAACTTCGGTGATCGGACGAGAACCGGTGTTTTCAACAGATC	AGGTCACCCATCTAAGTACTAATCGCGCCCGATGTTGCTTAACTTCGGTGATCGGACGAGAACCGGTGTTTTCAAAGATCG	10	D1	CCCGATGTTGCTTAACTTCGGTGATCGG	ACGAGAACCGGTGTTTTCAACAGATC	0.108696	-{-----(-----------------)-----}		0.0106	5S ribosomal RNA	PREDICTED: Uranotaenia lowii 5S ribosomal RNA (LOC129740736), rRNA	{'superkingdom': 'Eukaryota', 'phylum': 'Arthropoda', 'class': 'Insecta', 'order': 'Diptera', 'family': 'Culicidae', 'genus': 'Uranotaenia', 'species': 'Uranotaenia lowii'}	Uranotaenia lowii
CGGTCACCCATCTAAGTACTAATCGCG	CGGTCACCCATCTAAGTACTAATCGCGCCCGATGTTGCTTAACTTCGGTGATCGGACGAGAACCGGTGTTTTCAACAGATC	CGGTCACCCATCTAAGTACTAATCGCGCCCGATGTTGCTTAACTTCAGTGATCGGACGAGAACTGGTGTTTTCAACAGATC	5798	D1	CCCGATGTTGCTTAACTTCGGTGATCGG	ACGAGAACCGGTGTTTTCAACAGATC	0.317004	-{-----(-------------a---)-----}		0.0106423	5S ribosomal RNA	PREDICTED: Uranotaenia lowii 5S ribosomal RNA (LOC129740736), rRNA	{'superkingdom': 'Eukaryota', 'phylum': 'Arthropoda', 'class': 'Insecta', 'order': 'Diptera', 'family': 'Culicidae', 'genus': 'Uranotaenia', 'species': 'Uranotaenia lowii'}	Uranotaenia lowii
CGGTCACCCATCTAAGTACTAATCGCG	CGGTCACCCATCTAAGTACTAATCGCGCCCGATGTTGCTTAACTTCGGTGATCGGACGAGAACCGGTGTTTTCAACAGATC	CGGTCACCCATCTAAGTACTAATCGCGCCCGATGTTGCTTAACTTCGGTGATCGGACGAGAACCGGTGTTTTCAAGATCGG	4651	D1	CCCGATGTTGCTTAACTTCGGTGATCGG	ACGAGAACCGGTGTTTTCAACAGATC	0.254292	-{-----(-----------------)-----}		0.0106423	5S ribosomal RNA	PREDICTED: Uranotaenia lowii 5S ribosomal RNA (LOC129740736), rRNA	{'superkingdom': 'Eukaryota', 'phylum': 'Arthropoda', 'class': 'Insecta', 'order': 'Diptera', 'family': 'Culicidae', 'genus': 'Uranotaenia', 'species': 'Uranotaenia lowii'}	Uranotaenia lowii
CGGTCACCCATCTAAGTACTAATCGCG	CGGTCACCCATCTAAGTACTAATCGCGCCCGATGTTGCTTAACTTCGGTGATCGGACGAGAACCGGTGTTTTCAACAGATC	CGGTCACCCATCTAAGTACTAATCGCGCCCGATGTTGCTTAACTTCAGTGATCGGACGAGAACTGGTGTTTTCAAGATCGG	3895	D1	CCCGATGTTGCTTAACTTCGGTGATCGG	ACGAGAACCGGTGTTTTCAACAGATC	0.212958	-{-----(-------------a---)-----}		0.0106423	5S ribosomal RNA	PREDICTED: Uranotaenia lowii 5S ribosomal RNA (LOC129740736), rRNA	{'superkingdom': 'Eukaryota', 'phylum': 'Arthropoda', 'class': 'Insecta', 'order': 'Diptera', 'family': 'Culicidae', 'genus': 'Uranotaenia', 'species': 'Uranotaenia lowii'}	Uranotaenia lowii
CGGTCACCCATCTAAGTACTAATCGCG	CGGTCACCCATCTAAGTACTAATCGCGCCCGATGTTGCTTAACTTCGGTGATCGGACGAGAACCGGTGTTTTCAACAGATC	CGGTCACCCATCTAAGTACTAATCGCGCCCGATGTTGCTTAACTTCAGTGATCGGACGAGAACTGGTGTTTTCAGATCGGA	2029	D1	CCCGATGTTGCTTAACTTCGGTGATCGG	ACGAGAACCGGTGTTTTCAACAGATC	0.110935	-{-----(-------------a---)-----}		0.0106423	5S ribosomal RNA	PREDICTED: Uranotaenia lowii 5S ribosomal RNA (LOC129740736), rRNA	{'superkingdom': 'Eukaryota', 'phylum': 'Arthropoda', 'class': 'Insecta', 'order': 'Diptera', 'family': 'Culicidae', 'genus': 'Uranotaenia', 'species': 'Uranotaenia lowii'}	Uranotaenia lowii
CGGTCACCCATCTAAGTACTAATCGCG	CGGTCACCCATCTAAGTACTAATCGCGCCCGATGTTGCTTAACTTCGGTGATCGGACGAGAACCGGTGTTTTCAACAGATC	CGGTCACCCATCTAAGTACTAATCGCGCCCGATGTTGCTTAACTTCGGTGATCGGACGAGAACCGGTGTTTTCAAAGATCG	1917	D1	CCCGATGTTGCTTAACTTCGGTGATCGG	ACGAGAACCGGTGTTTTCAACAGATC	0.104811	-{-----(-----------------)-----}		0.0106423	5S ribosomal RNA	PREDICTED: Uranotaenia lowii 5S ribosomal RNA (LOC129740736), rRNA	{'superkingdom': 'Eukaryota', 'phylum': 'Arthropoda', 'class': 'Insecta', 'order': 'Diptera', 'family': 'Culicidae', 'genus': 'Uranotaenia', 'species': 'Uranotaenia lowii'}	Uranotaenia lowii
GGATTTGAACCAGCGACCTCCGGATTG	GGATTTGAACCAGCGACCTCCGGATTGATAGTCCAGTGCGCTGACAATTGATCCTCAAATATATTTCAAAATTTCGATGT	GGATTTGAACCAGCGACCTCCGGATTGTGAGTCCTGGACGCTGACAATTGATCCAAACAGGCAGACGATGTCAGTTATTTT	4	D1	ATAGTCCAGTGCGCTGACAATTGATCCT	CAAATATATTTCAAAATTTCGATGTT	0.173913		a{-c-gG()C-gac}g-tgtcagtt--t--	0.010809		Limnephilus auricula genome assembly, chromosome: 4	{'superkingdom': 'Eukaryota', 'phylum': 'Arthropoda', 'class': 'Insecta', 'order': 'Trichoptera', 'family': 'Limnephilidae', 'genus': 'Limnephilus', 'species': 'Limnephilus auricula'}	Limnephilus auricula
GGATTTGAACCAGCGACCTCCGGATTG	GGATTTGAACCAGCGACCTCCGGATTGATAGTCCAGTGCGCTGACAATTGATCCTCAAATATATTTCAAAATTTCGATGT	GGATTTGAACCAGCGACCTCCGGATTGTGAGTCCTGGACGCTGACAATTGATCCAAACAGGCAGACATGTTGTTTTTAATA	3	D1	ATAGTCCAGTGCGCTGACAATTGATCCT	CAAATATATTTCAAAATTTCGATGTT	0.130435		a{-c-gG()C-gac}atgttg--tttaa-a	0.010809		Limnephilus auricula genome assembly, chromosome: 4	{'superkingdom': 'Eukaryota', 'phylum': 'Arthropoda', 'class': 'Insecta', 'order': 'Trichoptera', 'family': 'Limnephilidae', 'genus': 'Limnephilus', 'species': 'Limnephilus auricula'}	Limnephilus auricula
GGATTTGAACCAGCGACCTCCGGATTG	GGATTTGAACCAGCGACCTCCGGATTGATAGTCCAGTGCGCTGACAATTGATCCTCAAATATATTTCAAAATTTCGATGT	GGATTTGAACCAGCGACCTCCGGATTGTGAGTCCTGGACGCTGACAATTGATCCAAACAGGCAGACCAAGCGTACAACGAG	3	D1	ATAGTCCAGTGCGCTGACAATTGATCCT	CAAATATATTTCAAAATTTCGATGTT	0.130435		a{-c-gG()C-gac}---gcg-a-a-c-ag	0.010809		Limnephilus auricula genome assembly, chromosome: 4	{'superkingdom': 'Eukaryota', 'phylum': 'Arthropoda', 'class': 'Insecta', 'order': 'Trichoptera', 'family': 'Limnephilidae', 'genus': 'Limnephilus', 'species': 'Limnephilus auricula'}	Limnephilus auricula
GGATTTGAACCAGCGACCTCCGGATTG	GGATTTGAACCAGCGACCTCCGGATTGATAGTCCAGTGCGCTGACAATTGATCCTCAAATATATTTCAAAATTTCGATGT	GGATTTGAACCAGCGACCTCCGGATTGTTAGTCCTGGACGCTGACAATTCTAGCGTTTTATTTGAAAAAGACCAATTTGCC	3	D1	ATAGTCCAGTGCGCTGACAATTGATCCT	CAAATATATTTCAAAATTTCGATGTT	0.130435		t{TTtAt()-TgAA}a--g-ccaatt--cc	0.010809		Limnephilus auricula genome assembly, chromosome: 4	{'superkingdom': 'Eukaryota', 'phylum': 'Arthropoda', 'class': 'Insecta', 'order': 'Trichoptera', 'family': 'Limnephilidae', 'genus': 'Limnephilus', 'species': 'Limnephilus auricula'}	Limnephilus auricula
GGATTTGAACCAGCGACCTCCGGATTG	GGATTTGAACCAGCGACCTCCGGATTGATAGTCCAGTGCGCTGACAATTGATCCTCAAATATATTTCAAAATTTCGATGT	GGATTTGAACCAGCGACCTCCGGATTGATAGTCCAGTGCGCTGACAATTGATCCACACAGGCAGCAATAGTTAACTAACTT	2	D1	ATAGTCCAGTGCGCTGACAATTGATCCT	CAAATATATTTCAAAATTTCGATGTT	0.0869565		-{-c-gG()C-gca}at-gt-aa-t-ac--	0.010809	tRNA	Limnephilus auricula genome assembly, chromosome: 4	{'superkingdom': 'Eukaryota', 'phylum': 'Arthropoda', 'class': 'Insecta', 'order': 'Trichoptera', 'family': 'Limnephilidae', 'genus': 'Limnephilus', 'species': 'Limnephilus auricula'}	Limnephilus auricula
GGATTTGAACCAGCGACCTCCGGATTG	GGATTTGAACCAGCGACCTCCGGATTGATAGTCCAGTGCGCTGACAATTGATCCTCAAATATATTTCAAAATTTCGATGT	GGATTTGAACCAGCGACCTCCGGATTGATAGTCCAGTGCGCTGACAATTGATCCACACAGTAAGACGAGCATTTTATGCAT	2	D1	ATAGTCCAGTGCGCTGACAATTGATCCT	CAAATATATTTCAAAATTTCGATGTT	0.0869565		-{-c-gT()A-gac}g-gc----tatgca-	0.010809		Limnephilus auricula genome assembly, chromosome: 4	{'superkingdom': 'Eukaryota', 'phylum': 'Arthropoda', 'class': 'Insecta', 'order': 'Trichoptera', 'family': 'Limnephilidae', 'genus': 'Limnephilus', 'species': 'Limnephilus auricula'}	Limnephilus auricula
GGATTTGAACCAGCGACCTCCGGATTG	GGATTTGAACCAGCGACCTCCGGATTGATAGTCCAGTGCGCTGACAATTGATCCTCAAATATATTTCAAAATTTCGATGT	GGATTTGAACCAGCGACCTCCGGATTGATAGTTCAGTGCGCCGTCCATTGCAGAGTTGAATTGTACGGGTGTACTGAGCCC	2	D1	ATAGTCCAGTGCGCTGACAATTGATCCT	CAAATATATTTCAAAATTTCGATGTT	0.0869565		t{tg-at()-g-ac}gggtg-act--gccc	0.010809		Limnephilus auricula genome assembly, chromosome: 4	{'superkingdom': 'Eukaryota', 'phylum': 'Arthropoda', 'class': 'Insecta', 'order': 'Trichoptera', 'family': 'Limnephilidae', 'genus': 'Limnephilus', 'species': 'Limnephilus auricula'}	Limnephilus auricula
GGATTTGAACCAGCGACCTCCGGATTG	GGATTTGAACCAGCGACCTCCGGATTGATAGTCCAGTGCGCTGACAATTGATCCTCAAATATATTTCAAAATTTCGATGT	GGATTTGAACCAGCGACCTCCGGATTGGAAGTCCGGTGCGCTGTCGATTGATCCACACAGGCAGACTATTATTGTATTAGT	2	D1	ATAGTCCAGTGCGCTGACAATTGATCCT	CAAATATATTTCAAAATTTCGATGTT	0.0869565		-{-c-gG()C-gac}t-tt---gtat-ag-	0.010809	tRNA	Limnephilus auricula genome assembly, chromosome: 4	{'superkingdom': 'Eukaryota', 'phylum': 'Arthropoda', 'class': 'Insecta', 'order': 'Trichoptera', 'family': 'Limnephilidae', 'genus': 'Limnephilus', 'species': 'Limnephilus auricula'}	Limnephilus auricula
GGATTTGAACCAGCGACCTCCGGATTG	GGATTTGAACCAGCGACCTCCGGATTGATAGTCCAGTGCGCTGACAATTGATCCTCAAATATATTTCAAAATTTCGATGT	GGATTTGAACCAGCGACCTCCGGATTGGGAGTCCAGTGCGCTGTCGATTGTTCCACACAGGCAGACATCCAAACTGTTTTG	2	D1	ATAGTCCAGTGCGCTGACAATTGATCCT	CAAATATATTTCAAAATTTCGATGTT	0.0869565		-{-c-gG()C-gac}atcc-aact-t-t-g	0.010809	tRNA	Limnephilus auricula genome assembly, chromosome: 4	{'superkingdom': 'Eukaryota', 'phylum': 'Arthropoda', 'class': 'Insecta', 'order': 'Trichoptera', 'family': 'Limnephilidae', 'genus': 'Limnephilus', 'species': 'Limnephilus auricula'}	Limnephilus auricula
TACCGCGCCTGCTGGCACCAGACTTGC	TACCGCGCCTGCTGGCACCAGACTTGCCCTCCACTTGATCCTTACCGAAGGATTTATGCTCGGTTCATTCCAATTATAAA	TACCGCGCCTGCTGGCACCAGACTTGCCCTCCACTTGATCCTTGTTGAAGGATTTATGCTCAACTCATTCCAATTATAAGA	5	D3	CCTCCACTTGATCCTCCAATTATAAAA	TTACCGAAGGATTTATGCTCGGTTCAT	0.384615		--{GTT--(-----------)--AAC}----	0.0110857	18S ribosomal RNA	Culex tritaeniorhynchus isolate MG_S115 small subunit ribosomal RNA, partial sequence	{'superkingdom': 'Eukaryota', 'phylum': 'Arthropoda', 'class': 'Insecta', 'order': 'Diptera', 'family': 'Culicidae', 'genus': 'Culex', 'species': 'Culex tritaeniorhynchus'}	Culex tritaeniorhynchus
TACCGCGCCTGCTGGCACCAGACTTGC	TACCGCGCCTGCTGGCACCAGACTTGCCCTCCACTTGATCCTTACCGAAGGATTTATGCTCGGTTCATTCCAATTATAAA	TACCGCGCCTGCTGGCACCAGACTTGCCCACCACAAGAACCATGTTGAAGGATTTATCCACAACTCAAACCAATTATAACA	1	D3	CCTCCACTTGATCCTCCAATTATAAAA	TTACCGAAGGATTTATGCTCGGTTCAT	0.0769231		a-{GTT--(---------c-)a-AAC}---a	0.0110857		Culex tritaeniorhynchus isolate MG_S115 small subunit ribosomal RNA, partial sequence	{'superkingdom': 'Eukaryota', 'phylum': 'Arthropoda', 'class': 'Insecta', 'order': 'Diptera', 'family': 'Culicidae', 'genus': 'Culex', 'species': 'Culex tritaeniorhynchus'}	Culex tritaeniorhynchus
TACCGCGCCTGCTGGCACCAGACTTGC	TACCGCGCCTGCTGGCACCAGACTTGCCCTCCACTTGATCCTTACCGAAGGATTTATGCTCGGTTCATTCCAATTATAAA	TACCGCGCCTGCTGGCACCAGACTTGCCCACCACATGATCCATGTTGAAGGAATTATGCTCAACTCATTCCAATTATAAGA	1	D3	CCTCCACTTGATCCTCCAATTATAAAA	TTACCGAAGGATTTATGCTCGGTTCAT	0.0769231		a-{GTT--(----a------)--AAC}----	0.0110857		Culex tritaeniorhynchus isolate MG_S115 small subunit ribosomal RNA, partial sequence	{'superkingdom': 'Eukaryota', 'phylum': 'Arthropoda', 'class': 'Insecta', 'order': 'Diptera', 'family': 'Culicidae', 'genus': 'Culex', 'species': 'Culex tritaeniorhynchus'}	Culex tritaeniorhynchus
TACCGCGCCTGCTGGCACCAGACTTGC	TACCGCGCCTGCTGGCACCAGACTTGCCCTCCACTTGATCCTTACCGAAGGATTTATGCTCGGTTCATTCCAATTATAAA	TACCGCGCCTGCTGGCACCAGACTTGCCCACCACTAGAACCTTGATGAAGGAGGTATGCTCAACTCAATCAAATTATAAGA	1	D3	CCTCCACTTGATCCTCCAATTATAAAA	TTACCGAAGGATTTATGCTCGGTTCAT	0.0769231		--{GaT--(----gg-----)--AaC}---a	0.0110857		Culex tritaeniorhynchus isolate MG_S115 small subunit ribosomal RNA, partial sequence	{'superkingdom': 'Eukaryota', 'phylum': 'Arthropoda', 'class': 'Insecta', 'order': 'Diptera', 'family': 'Culicidae', 'genus': 'Culex', 'species': 'Culex tritaeniorhynchus'}	Culex tritaeniorhynchus
TACCGCGCCTGCTGGCACCAGACTTGC	TACCGCGCCTGCTGGCACCAGACTTGCCCTCCACTTGATCCTTACCGAAGGATTTATGCTCGGTTCATTCCAATTATAAA	TACCGCGCCTGCTGGCACCAGACTTGCCCACCACTAGATCCATACCGAAGGATTTATGCTCGGTTCATTCCAATTATAAAA	1	D3	CCTCCACTTGATCCTCCAATTATAAAA	TTACCGAAGGATTTATGCTCGGTTCAT	0.0769231		a-{-----(-----------)-----}----	0.0110857		Culex tritaeniorhynchus isolate MG_S115 small subunit ribosomal RNA, partial sequence	{'superkingdom': 'Eukaryota', 'phylum': 'Arthropoda', 'class': 'Insecta', 'order': 'Diptera', 'family': 'Culicidae', 'genus': 'Culex', 'species': 'Culex tritaeniorhynchus'}	Culex tritaeniorhynchus
TACCGCGCCTGCTGGCACCAGACTTGC	TACCGCGCCTGCTGGCACCAGACTTGCCCTCCACTTGATCCTTACCGAAGGATTTATGCTCGGTTCATTCCAATTATAAA	TACCGCGCCTGCTGGCACCAGACTTGCCCTCAACTTGATCCTTACCTAATGAATTAAGCTCGGTTCAATACAATTATAAAA	1	D3	CCTCCACTTGATCCTCCAATTATAAAA	TTACCGAAGGATTTATGCTCGGTTCAT	0.0769231		--{---t-(-t--a---a--)-----}---a	0.0110857		Culex tritaeniorhynchus isolate MG_S115 small subunit ribosomal RNA, partial sequence	{'superkingdom': 'Eukaryota', 'phylum': 'Arthropoda', 'class': 'Insecta', 'order': 'Diptera', 'family': 'Culicidae', 'genus': 'Culex', 'species': 'Culex tritaeniorhynchus'}	Culex tritaeniorhynchus
TACCGCGCCTGCTGGCACCAGACTTGC	TACCGCGCCTGCTGGCACCAGACTTGCCCTCCACTTGATCCTTACCGAAGGATTTATGCTCGGTTCATTCCAATTATAAA	TACCGCGCCTGCTGGCACCAGACTTGCCCTCCACTAGAACCTTACCGAACCATTTATGCTCGGTTCATTCCAATTATAAAA	1	D3	CCTCCACTTGATCCTCCAATTATAAAA	TTACCGAAGGATTTATGCTCGGTTCAT	0.0769231		--{-----(-cc--------)-----}----	0.0110857	18S ribosomal RNA	Culex tritaeniorhynchus isolate MG_S115 small subunit ribosomal RNA, partial sequence	{'superkingdom': 'Eukaryota', 'phylum': 'Arthropoda', 'class': 'Insecta', 'order': 'Diptera', 'family': 'Culicidae', 'genus': 'Culex', 'species': 'Culex tritaeniorhynchus'}	Culex tritaeniorhynchus
TACCGCGCCTGCTGGCACCAGACTTGC	TACCGCGCCTGCTGGCACCAGACTTGCCCTCCACTTGATCCTTACCGAAGGATTTATGCTCGGTTCATTCCAATTATAAA	TACCGCGCCTGCTGGCACCAGACTTGCCCTCCACTTGATCCTTACAGAAGGATATATGCTCGGTTCATTCCAATAGATCGG	1	D3	CCTCCACTTGATCCTCCAATTATAAAA	TTACCGAAGGATTTATGCTCGGTTCAT	0.0769231		--{--a--(-----a-----)-----}----	0.0110857	18S ribosomal RNA	Culex tritaeniorhynchus isolate MG_S115 small subunit ribosomal RNA, partial sequence	{'superkingdom': 'Eukaryota', 'phylum': 'Arthropoda', 'class': 'Insecta', 'order': 'Diptera', 'family': 'Culicidae', 'genus': 'Culex', 'species': 'Culex tritaeniorhynchus'}	Culex tritaeniorhynchus
TACCGCGCCTGCTGGCACCAGACTTGC	TACCGCGCCTGCTGGCACCAGACTTGCCCTCCACTTGATCCTTACCGAAGGATTTATGCTCGGTTCATTCCAATTATAAA	TACCGCGCCTGCTGGCACCAGACTTGCCCTCCACTTGATCCTTACCGAAGGATTTATGCTCGGTTCATTCCAAAGATCGGA	1	D3	CCTCCACTTGATCCTCCAATTATAAAA	TTACCGAAGGATTTATGCTCGGTTCAT	0.0769231		--{-----(-----------)-----}----	0.0110857	18S ribosomal RNA	Culex tritaeniorhynchus isolate MG_S115 small subunit ribosomal RNA, partial sequence	{'superkingdom': 'Eukaryota', 'phylum': 'Arthropoda', 'class': 'Insecta', 'order': 'Diptera', 'family': 'Culicidae', 'genus': 'Culex', 'species': 'Culex tritaeniorhynchus'}	Culex tritaeniorhynchus
TCCCAATCGGTCACCCATCTAAGTACT	TCCCAATCGGTCACCCATCTAAGTACTAATCGCGCCCGATGTTGCTTAACTTCGGTGATCGGACGAGAACCGGTGTTTTCA	TCCCAATCGGTCACCCATCTAAGTACTAATCGCGCCCGATGTTGCTTAACTTCAGTGATCGGACGAGAACTGGTGTTTTCA	48	D2	AATCGCGCCCGATGTGATCGGACGAGA	TTGCTTAACTTCGGACCGGTGTTTTCA	0.657534	--------{-----(---)-----}------		0.0111606	5S ribosomal RNA	PREDICTED: Uranotaenia lowii 5S ribosomal RNA (LOC129740736), rRNA	{'superkingdom': 'Eukaryota', 'phylum': 'Arthropoda', 'class': 'Insecta', 'order': 'Diptera', 'family': 'Culicidae', 'genus': 'Uranotaenia', 'species': 'Uranotaenia lowii'}	Uranotaenia lowii
TCCCAATCGGTCACCCATCTAAGTACT	TCCCAATCGGTCACCCATCTAAGTACTAATCGCGCCCGATGTTGCTTAACTTCGGTGATCGGACGAGAACCGGTGTTTTCA	TCCCAATCGGTCACCCATCTAAGTACTAATCGCGCCCGATGTTGCTTAACTTCAGTGATCGGACGAGAACTGGTGAGATCG	16	D2	AATCGCGCCCGATGTGATCGGACGAGA	TTGCTTAACTTCGGACCGGTGTTTTCA	0.219178	--------{-----(---)-----}------		0.0111606	5S ribosomal RNA	PREDICTED: Uranotaenia lowii 5S ribosomal RNA (LOC129740736), rRNA	{'superkingdom': 'Eukaryota', 'phylum': 'Arthropoda', 'class': 'Insecta', 'order': 'Diptera', 'family': 'Culicidae', 'genus': 'Uranotaenia', 'species': 'Uranotaenia lowii'}	Uranotaenia lowii
TCCCAATCGGTCACCCATCTAAGTACT	TCCCAATCGGTCACCCATCTAAGTACTAATCGCGCCCGATGTTGCTTAACTTCGGTGATCGGACGAGAACCGGTGTTTTCA	TCCCAATCGGTCACCCATCTAAGTACTAATCGCGCCCGATGTTGCTTAACTTCAGTGATCGGACGAGAACTGGTAGATCGG	9	D2	AATCGCGCCCGATGTGATCGGACGAGA	TTGCTTAACTTCGGACCGGTGTTTTCA	0.123288	--------{-----(---)-----}------		0.0111606	5S ribosomal RNA	PREDICTED: Uranotaenia lowii 5S ribosomal RNA (LOC129740736), rRNA	{'superkingdom': 'Eukaryota', 'phylum': 'Arthropoda', 'class': 'Insecta', 'order': 'Diptera', 'family': 'Culicidae', 'genus': 'Uranotaenia', 'species': 'Uranotaenia lowii'}	Uranotaenia lowii
CGGCGTTCGGTTCATCCCGCAGCGCCA	CGGCGTTCGGTTCATCCCGCAGCGCCAGTTCTGCTTACCAAAAGTGGCCCACTAGGCACTCGCATTCCACGCCCGGCTCCA	CGGCGTTCGGTTCATCCCGCAGCGCCAGTTCTGCTTACCAAAAGTGGCCCACTGAGCACTCGCATTCCACGGCGCGGCTCC	124	D1	GTTCTGCTTACCAAAAGTGGCCCACTAG	GCACTCGCATTCCACGCCCGGCTCCA	0.659574	---------------{-----(-)-----}ga		0.0112445	28S ribosomal RNA	Capra hircus breed Inner Mongolia cashmere goat chromosome 28	{'superkingdom': 'Eukaryota', 'phylum': 'Chordata', 'class': 'Mammalia', 'order': 'Artiodactyla', 'family': 'Bovidae', 'genus': 'Capra', 'species': 'Capra hircus'}	Capra hircus
CGGCGTTCGGTTCATCCCGCAGCGCCA	CGGCGTTCGGTTCATCCCGCAGCGCCAGTTCTGCTTACCAAAAGTGGCCCACTAGGCACTCGCATTCCACGCCCGGCTCCA	CGGCGTTCGGTTCATCCCGCAGCGCCAGTTCTGCTTACCAAAAGTGGCCCACTAAGCGCCTAGGGTTCCGTCGCCGGCTTC	35	D1	GTTCTGCTTACCAAAAGTGGCCCACTAG	GCACTCGCATTCCACGCCCGGCTCCA	0.18617	---------------{-----(-)-----}-a		0.0112445	28S ribosomal RNA	Capra hircus breed Inner Mongolia cashmere goat chromosome 28	{'superkingdom': 'Eukaryota', 'phylum': 'Chordata', 'class': 'Mammalia', 'order': 'Artiodactyla', 'family': 'Bovidae', 'genus': 'Capra', 'species': 'Capra hircus'}	Capra hircus
CGGCGTTCGGTTCATCCCGCAGCGCCA	CGGCGTTCGGTTCATCCCGCAGCGCCAGTTCTGCTTACCAAAAGTGGCCCACTAGGCACTCGCATTCCACGCCCGGCTCCA	CGGCGTTCGGTTCATCCCGCAGCGCCAGTTCTGCTTACCAAAAGTGGCCCACTAGGCACTCGCATTCCACGCGGCCCGGCT	29	D1	GTTCTGCTTACCAAAAGTGGCCCACTAG	GCACTCGCATTCCACGCCCGGCTCCA	0.154255	---------------{-----(-)-----}--		0.0112445	28S ribosomal RNA	Capra hircus breed Inner Mongolia cashmere goat chromosome 28	{'superkingdom': 'Eukaryota', 'phylum': 'Chordata', 'class': 'Mammalia', 'order': 'Artiodactyla', 'family': 'Bovidae', 'genus': 'Capra', 'species': 'Capra hircus'}	Capra hircus
CGGCGTTCGGTTCATCCCGCAGCGCCA	CGGCGTTCGGTTCATCCCGCAGCGCCAGTTCTGCTTACCAAAAGTGGCCCACTAGGCACTCGCATTCCACGCCCGGCTCCA	CGGCGTTCGGTTCATCCCGCAGCGCCAGTTCTGCTTACCAAAAGTGGCCCACTGAGCACTCGCATTCCACGGCGCGGCTCC	124	D3	GTTCTGCTTACCAAACGCCCGGCTCCA	AAGTGGCCCACTAGGCACTCGCATTCC	0.659574		-{-----(-)-----}ga-------------	0.0112445	28S ribosomal RNA	Capra hircus breed Inner Mongolia cashmere goat chromosome 28	{'superkingdom': 'Eukaryota', 'phylum': 'Chordata', 'class': 'Mammalia', 'order': 'Artiodactyla', 'family': 'Bovidae', 'genus': 'Capra', 'species': 'Capra hircus'}	Capra hircus
CGGCGTTCGGTTCATCCCGCAGCGCCA	CGGCGTTCGGTTCATCCCGCAGCGCCAGTTCTGCTTACCAAAAGTGGCCCACTAGGCACTCGCATTCCACGCCCGGCTCCA	CGGCGTTCGGTTCATCCCGCAGCGCCAGTTCTGCTTACCAAAAGTGGCCCACTAAGCGCCTAGGGTTCCGTCGCCGGCTTC	35	D3	GTTCTGCTTACCAAACGCCCGGCTCCA	AAGTGGCCCACTAGGCACTCGCATTCC	0.18617		-{-----(-)-----}-a--g-ctaggg-t-	0.0112445	28S ribosomal RNA	Capra hircus breed Inner Mongolia cashmere goat chromosome 28	{'superkingdom': 'Eukaryota', 'phylum': 'Chordata', 'class': 'Mammalia', 'order': 'Artiodactyla', 'family': 'Bovidae', 'genus': 'Capra', 'species': 'Capra hircus'}	Capra hircus
CGGCGTTCGGTTCATCCCGCAGCGCCA	CGGCGTTCGGTTCATCCCGCAGCGCCAGTTCTGCTTACCAAAAGTGGCCCACTAGGCACTCGCATTCCACGCCCGGCTCCA	CGGCGTTCGGTTCATCCCGCAGCGCCAGTTCTGCTTACCAAAAGTGGCCCACTAGGCACTCGCATTCCACGCGGCCCGGCT	29	D3	GTTCTGCTTACCAAACGCCCGGCTCCA	AAGTGGCCCACTAGGCACTCGCATTCC	0.154255		-{-----(-)-----}---------------	0.0112445	28S ribosomal RNA	Capra hircus breed Inner Mongolia cashmere goat chromosome 28	{'superkingdom': 'Eukaryota', 'phylum': 'Chordata', 'class': 'Mammalia', 'order': 'Artiodactyla', 'family': 'Bovidae', 'genus': 'Capra', 'species': 'Capra hircus'}	Capra hircus
ATGTACTGAACATCGAGAGCAAGCCAG	ATGTACTGAACATCGAGAGCAAGCCAGCTTTTGTCCTTATGCTCAGCGTGTGGTTTCTGTCCACACTGAGCGGAGCTTTGG	ATGTACTGAACATCGAGAGCAAGCCAGCTTTTGTCCTTATGCTCAGCGTGTGGTTTCTGTCCACACTGAGCTGACCTTTGG	5	D3	CTTTTGTCCTTATGAGCGGAGCTTTGG	CTCAGCGTGTGGTTTCTGTCCACACTG	0.714286		------{------(-------)------}--	0.0112764	28S ribosomal RNA	PREDICTED: Malaya genurostris large subunit ribosomal RNA (LOC131433516), rRNA	{'superkingdom': 'Eukaryota', 'phylum': 'Arthropoda', 'class': 'Insecta', 'order': 'Diptera', 'family': 'Culicidae', 'genus': 'Malaya', 'species': 'Malaya genurostris'}	Malaya genurostris
ATGTACTGAACATCGAGAGCAAGCCAG	ATGTACTGAACATCGAGAGCAAGCCAGCTTTTGTCCTTATGCTCAGCGTGTGGTTTCTGTCCACACTGAGCGGAGCTTTGG	ATGTACTGAACATCGAGAGCAAGCCAGCTTTTGTCCTTATGCTCAGCGTGTGGTTGGTGTCCACACGGAGCGGACCTGTGG	1	D3	CTTTTGTCCTTATGAGCGGAGCTTTGG	CTCAGCGTGTGGTTTCTGTCCACACTG	0.142857		------{------(--gg---)------}g-	0.0112764		PREDICTED: Malaya genurostris large subunit ribosomal RNA (LOC131433516), rRNA	{'superkingdom': 'Eukaryota', 'phylum': 'Arthropoda', 'class': 'Insecta', 'order': 'Diptera', 'family': 'Culicidae', 'genus': 'Malaya', 'species': 'Malaya genurostris'}	Malaya genurostris
ATGTACTGAACATCGAGAGCAAGCCAG	ATGTACTGAACATCGAGAGCAAGCCAGCTTTTGTCCTTATGCTCAGCGTGTGGTTTCTGTCCACACTGAGCGGAGCTTTGG	ATGTACTGAACATCGAGAGCAAGCCAGCTTTTGTCCTTATGCTCAGCGTGTGGTTTCTGTCCACACGGGGCTGACCTGTGG	1	D3	CTTTTGTCCTTATGAGCGGAGCTTTGG	CTCAGCGTGTGGTTTCTGTCCACACTG	0.142857		------{------(-------)------}g-	0.0112764		PREDICTED: Malaya genurostris large subunit ribosomal RNA (LOC131433516), rRNA	{'superkingdom': 'Eukaryota', 'phylum': 'Arthropoda', 'class': 'Insecta', 'order': 'Diptera', 'family': 'Culicidae', 'genus': 'Malaya', 'species': 'Malaya genurostris'}	Malaya genurostris
GCAGATGGGAATCGAACCCAGAACCAT	GCAGATGGGAATCGAACCCAGAACCATCCGCTTACAAAGCGAATTACGCAACCATTAAGCCACGACTGCTCCTTTCGTCG	GCAGATGGGAATCGAACCCAGAACCATCCGCTTACAAAGCGAATTGCGTAACCATTAAGCCACGCTGGGACCACCTCATTA	3	D3	CCGCTTACAAAGCGCTCCTTTCGTCGA	AATTACGCAACCATTAAGCCACGACTG	0.214286	-{-----(---)-----}ga--acctcatt-		0.0115519		PREDICTED: Culex pipiens pallens uncharacterized LOC120430829 (LOC120430829), mRNA	{'superkingdom': 'Eukaryota', 'phylum': 'Arthropoda', 'class': 'Insecta', 'order': 'Diptera', 'family': 'Culicidae', 'genus': 'Culex', 'species': 'Culex pipiens'}	Culex pipiens
GCAGATGGGAATCGAACCCAGAACCAT	GCAGATGGGAATCGAACCCAGAACCATCCGCTTACAAAGCGAATTACGCAACCATTAAGCCACGACTGCTCCTTTCGTCG	GCAGATGGGAATCGAACCCAGAACCATCCGCTTACAAAGCGAATTGCGTAACCATTAAGCCACGACTGCTCCTAGAGAAAA	2	D3	CCGCTTACAAAGCGCTCCTTTCGTCGA	AATTACGCAACCATTAAGCCACGACTG	0.142857	-{-----(---)-----}-----aga-aaa-		0.0115519		PREDICTED: Culex pipiens pallens uncharacterized LOC120430829 (LOC120430829), mRNA	{'superkingdom': 'Eukaryota', 'phylum': 'Arthropoda', 'class': 'Insecta', 'order': 'Diptera', 'family': 'Culicidae', 'genus': 'Culex', 'species': 'Culex pipiens'}	Culex pipiens
GCAGATGGGAATCGAACCCAGAACCAT	GCAGATGGGAATCGAACCCAGAACCATCCGCTTACAAAGCGAATTACGCAACCATTAAGCCACGACTGCTCCTTTCGTCG	GCAGATGGGAATCGAACCCAGAACCATTCGCTTACAAAGCGAACACCGTAACCATTCAGCCACAGCTGGGATTAATTTATA	2	D3	CCGCTTACAAAGCGCTCCTTTCGTCGA	AATTACGCAACCATTAAGCCACGACTG	0.142857	t{-----(---)-----}ggat-aatt-at-		0.0115519	tRNA	PREDICTED: Culex pipiens pallens uncharacterized LOC120430829 (LOC120430829), mRNA	{'superkingdom': 'Eukaryota', 'phylum': 'Arthropoda', 'class': 'Insecta', 'order': 'Diptera', 'family': 'Culicidae', 'genus': 'Culex', 'species': 'Culex pipiens'}	Culex pipiens
GCAGATGGGAATCGAACCCAGAACCAT	GCAGATGGGAATCGAACCCAGAACCATCCGCTTACAAAGCGAATTACGCAACCATTAAGCCACGACTGCTCCTTTCGTCG	GCAGATGGGAATCGAACCCAGAACCATTCGCTTACACAGCGAACACCGTAACACCGTAATTTGTTAAATCTGCATATTTTT	2	D3	CCGCTTACAAAGCGCTCCTTTCGTCGA	AATTACGCAACCATTAAGCCACGACTG	0.142857	t{-----(---)c----}tctgca-at-ttt		0.0115519		PREDICTED: Culex pipiens pallens uncharacterized LOC120430829 (LOC120430829), mRNA	{'superkingdom': 'Eukaryota', 'phylum': 'Arthropoda', 'class': 'Insecta', 'order': 'Diptera', 'family': 'Culicidae', 'genus': 'Culex', 'species': 'Culex pipiens'}	Culex pipiens
GCAGATGGGAATCGAACCCAGAACCAT	GCAGATGGGAATCGAACCCAGAACCATCCGCTTACAAAGCGAATTACGCAACCATTAAGCCACGACTGCTCCTTTCGTCG	GCAGATGGGAATCGAACCCAGAACCATCCGCTTACAAAGCGAATTGCGTAACCATAAAGCCACGCCTGCCCCTTCCTGGTG	1	D3	CCGCTTACAAAGCGCTCCTTTCGTCGA	AATTACGCAACCATTAAGCCACGACTG	0.0714286	-{-----(---)-----}-c----c-tggtg		0.0115519		PREDICTED: Culex pipiens pallens uncharacterized LOC120430829 (LOC120430829), mRNA	{'superkingdom': 'Eukaryota', 'phylum': 'Arthropoda', 'class': 'Insecta', 'order': 'Diptera', 'family': 'Culicidae', 'genus': 'Culex', 'species': 'Culex pipiens'}	Culex pipiens
GCAGATGGGAATCGAACCCAGAACCAT	GCAGATGGGAATCGAACCCAGAACCATCCGCTTACAAAGCGAATTACGCAACCATTAAGCCACGACTGCTCCTTTCGTCG	GCAGATGGGAATCGAACCCAGAACCATCCGCTTACAAAGCGAATTGCGTAACCATTAAGCCACGACGCCTGCTCTAGCAAT	1	D3	CCGCTTACAAAGCGCTCCTTTCGTCGA	AATTACGCAACCATTAAGCCACGACTG	0.0714286	-{-----(---)-----}--g--c-a-caat		0.0115519		PREDICTED: Culex pipiens pallens uncharacterized LOC120430829 (LOC120430829), mRNA	{'superkingdom': 'Eukaryota', 'phylum': 'Arthropoda', 'class': 'Insecta', 'order': 'Diptera', 'family': 'Culicidae', 'genus': 'Culex', 'species': 'Culex pipiens'}	Culex pipiens
GCAGATGGGAATCGAACCCAGAACCAT	GCAGATGGGAATCGAACCCAGAACCATCCGCTTACAAAGCGAATTACGCAACCATTAAGCCACGACTGCTCCTTTCGTCG	GCAGATGGGAATCGAACCCAGAACCATCCGCTTACAAAGCGAATTGCGTAACCATTAAGCCACGACTGCTCCTCAACTGAA	1	D3	CCGCTTACAAAGCGCTCCTTTCGTCGA	AATTACGCAACCATTAAGCCACGACTG	0.0714286	-{-----(---)-----}-----caac-ga-		0.0115519		PREDICTED: Culex pipiens pallens uncharacterized LOC120430829 (LOC120430829), mRNA	{'superkingdom': 'Eukaryota', 'phylum': 'Arthropoda', 'class': 'Insecta', 'order': 'Diptera', 'family': 'Culicidae', 'genus': 'Culex', 'species': 'Culex pipiens'}	Culex pipiens
GCAGATGGGAATCGAACCCAGAACCAT	GCAGATGGGAATCGAACCCAGAACCATCCGCTTACAAAGCGAATTACGCAACCATTAAGCCACGACTGCTCCTTTCGTCG	GCAGATGGGAATCGAACCCAGAACCATCCGCTTACAAAGCGAATTGCGTAACCATTAAGCCACGACTGCTCTTATAAAAAT	1	D3	CCGCTTACAAAGCGCTCCTTTCGTCGA	AATTACGCAACCATTAAGCCACGACTG	0.0714286	-{-----(---)-----}---t-a-aaaaat		0.0115519		PREDICTED: Culex pipiens pallens uncharacterized LOC120430829 (LOC120430829), mRNA	{'superkingdom': 'Eukaryota', 'phylum': 'Arthropoda', 'class': 'Insecta', 'order': 'Diptera', 'family': 'Culicidae', 'genus': 'Culex', 'species': 'Culex pipiens'}	Culex pipiens
GCAGATGGGAATCGAACCCAGAACCAT	GCAGATGGGAATCGAACCCAGAACCATCCGCTTACAAAGCGAATTACGCAACCATTAAGCCACGACTGCTCCTTTCGTCG	GCAGATGGGAATCGAACCCAGAACCATCCGCTTACAAAGCGAATTGCGTAACCATTAAGCCACGCCTGCTCCTAAACTGTA	1	D3	CCGCTTACAAAGCGCTCCTTTCGTCGA	AATTACGCAACCATTAAGCCACGACTG	0.0714286	-{-----(---)-----}-----aaac-gt-		0.0115519		PREDICTED: Culex pipiens pallens uncharacterized LOC120430829 (LOC120430829), mRNA	{'superkingdom': 'Eukaryota', 'phylum': 'Arthropoda', 'class': 'Insecta', 'order': 'Diptera', 'family': 'Culicidae', 'genus': 'Culex', 'species': 'Culex pipiens'}	Culex pipiens
AGAGGATCGAAGGCGATTAGATACCGC	AGAGGATCGAAGGCGATTAGATACCGCCCTAGTTCTAACCGTAAACTATGCCAATTAGCAATTGGGAGACGCTACATTAT	AGAGGATCGAAGGCGATTAGATACCGCCCTAGTTCTAACCGTAAACTATGCCAATTAGCAATTGGGAGACAGATCGGAAGA	9	D1	CCTAGTTCTAACCGTAAACTATGCCAAT	TAGCAATTGGGAGACGCTACATTATG	0.36	--{-----(---------)-----}-------		0.011554	18S ribosomal RNA	PREDICTED: Ochlerotatus camptorhynchus small subunit ribosomal RNA (LOC135717040), rRNA	{'superkingdom': 'Eukaryota', 'phylum': 'Arthropoda', 'class': 'Insecta', 'order': 'Diptera', 'family': 'Culicidae', 'genus': 'Ochlerotatus', 'species': 'Ochlerotatus camptorhynchus'}	Ochlerotatus camptorhynchus
AGAGGATCGAAGGCGATTAGATACCGC	AGAGGATCGAAGGCGATTAGATACCGCCCTAGTTCTAACCGTAAACTATGCCAATTAGCAATTGGGAGACGCTACATTAT	AGAGGATCGAAGGCGATTAGATACCGCCCTAGTTCTAACCGTAAACTATGCCAATTAGCAATTGGGAGACGCTAGATCGGA	9	D1	CCTAGTTCTAACCGTAAACTATGCCAAT	TAGCAATTGGGAGACGCTACATTATG	0.36	--{-----(---------)-----}-------		0.011554	18S ribosomal RNA	PREDICTED: Ochlerotatus camptorhynchus small subunit ribosomal RNA (LOC135717040), rRNA	{'superkingdom': 'Eukaryota', 'phylum': 'Arthropoda', 'class': 'Insecta', 'order': 'Diptera', 'family': 'Culicidae', 'genus': 'Ochlerotatus', 'species': 'Ochlerotatus camptorhynchus'}	Ochlerotatus camptorhynchus
AGAGGATCGAAGGCGATTAGATACCGC	AGAGGATCGAAGGCGATTAGATACCGCCCTAGTTCTAACCGTAAACTATGCCAATTAGCAATTGGGAGACGCTACATTAT	AGAGGATCGAAGGCGATTAGATACCGCCCTAGTTCTAACCGTAAACTATGCCAATTAGCAATTGGGAGACGAGATCGGAAG	7	D1	CCTAGTTCTAACCGTAAACTATGCCAAT	TAGCAATTGGGAGACGCTACATTATG	0.28	--{-----(---------)-----}-------		0.011554	18S ribosomal RNA	PREDICTED: Ochlerotatus camptorhynchus small subunit ribosomal RNA (LOC135717040), rRNA	{'superkingdom': 'Eukaryota', 'phylum': 'Arthropoda', 'class': 'Insecta', 'order': 'Diptera', 'family': 'Culicidae', 'genus': 'Ochlerotatus', 'species': 'Ochlerotatus camptorhynchus'}	Ochlerotatus camptorhynchus
GTTTTCAACTAGCAATAATCGCACCTC	GTTTTCAACTAGCAATAATCGCACCTCGGTTGTACCTCATTGGTTACGATATCGCCAACGCTTGGCGGCCACAAGCCAGT	GTTTTCAACTAGCAATAATCGCACCTCGGATGTACCTCATTGTCTTAAGAGAGTCATAGTTACTCCCGCCGTTTACCCGCG	2	D1	GGTTGTACCTCATTGGTTACGATATCGC	CAACGCTTGGCGGCCACAAGCCAGTT	0.142857		at-g{tTAct(c-c---g)ttTA-}-c-cg	0.0116934		Anopheles arabiensis genome assembly, chromosome: 2	{'superkingdom': 'Eukaryota', 'phylum': 'Arthropoda', 'class': 'Insecta', 'order': 'Diptera', 'family': 'Culicidae', 'genus': 'Anopheles', 'species': 'Anopheles arabiensis'}	Anopheles arabiensis
GTTTTCAACTAGCAATAATCGCACCTC	GTTTTCAACTAGCAATAATCGCACCTCGGTTGTACCTCATTGGTTACGATATCGCCAACGCTTGGCGGCCACAAGCCAGT	GTTTTCAACTAGCAATAATCGCACCTCGGTAAAACCTCATATTTGATTGAGTCACGTTCGTTATCGGAATTAACCAGACAA	2	D1	GGTTGTACCTCATTGGTTACGATATCGC	CAACGCTTGGCGGCCACAAGCCAGTT	0.142857		gtt-{-t-aT(cg-aatt)A-cca}g-caa	0.0116934		Anopheles arabiensis genome assembly, chromosome: 2	{'superkingdom': 'Eukaryota', 'phylum': 'Arthropoda', 'class': 'Insecta', 'order': 'Diptera', 'family': 'Culicidae', 'genus': 'Anopheles', 'species': 'Anopheles arabiensis'}	Anopheles arabiensis
GTTTTCAACTAGCAATAATCGCACCTC	GTTTTCAACTAGCAATAATCGCACCTCGGTTGTACCTCATTGGTTACGATATCGCCAACGCTTGGCGGCCACAAGCCAGT	GTTTTCAACTAGCAATAATCGCACCTCGGTTGTACCTCATTGGTTACGATATCGCAGCAAGATTATTCTCGGCCGTAGGAT	2	D1	GGTTGTACCTCATTGGTTACGATATCGC	CAACGCTTGGCGGCCACAAGCCAGTT	0.142857		agca{Aga-t(attct-g)gcc-T}ag-a-	0.0116934	U4 spliceosomal RNA	Anopheles arabiensis genome assembly, chromosome: 2	{'superkingdom': 'Eukaryota', 'phylum': 'Arthropoda', 'class': 'Insecta', 'order': 'Diptera', 'family': 'Culicidae', 'genus': 'Anopheles', 'species': 'Anopheles arabiensis'}	Anopheles arabiensis
GTTTTCAACTAGCAATAATCGCACCTC	GTTTTCAACTAGCAATAATCGCACCTCGGTTGTACCTCATTGGTTACGATATCGCCAACGCTTGGCGGCCACAAGCCAGT	GTTTTCAACTAGCAATAATCGCACCTCGGTTGTACCTCATTGGTTACGATATCGCATGTCGCTATGAACGCTTGGCGGCCA	2	D1	GGTTGTACCTCATTGGTTACGATATCGC	CAACGCTTGGCGGCCACAAGCCAGTT	0.142857		atgt{cgC-A(tgaa-gc)TtG--}ggcca	0.0116934	U4 spliceosomal RNA	Anopheles arabiensis genome assembly, chromosome: 2	{'superkingdom': 'Eukaryota', 'phylum': 'Arthropoda', 'class': 'Insecta', 'order': 'Diptera', 'family': 'Culicidae', 'genus': 'Anopheles', 'species': 'Anopheles arabiensis'}	Anopheles arabiensis
GTTTTCAACTAGCAATAATCGCACCTC	GTTTTCAACTAGCAATAATCGCACCTCGGTTGTACCTCATTGGTTACGATATCGCCAACGCTTGGCGGCCACAAGCCAGT	GTTTTCAACTAGCAATAATCGCACCTCGGTTGTACCTCATTGGTTACGATATCGCCATTTCCTCTTCTTGCGGATGGCGGC	2	D1	GGTTGTACCTCATTGGTTACGATATCGC	CAACGCTTGGCGGCCACAAGCCAGTT	0.142857		--tt{t-c-C(ttcttgc)Gg-tg}gc-gc	0.0116934	U4 spliceosomal RNA	Anopheles arabiensis genome assembly, chromosome: 2	{'superkingdom': 'Eukaryota', 'phylum': 'Arthropoda', 'class': 'Insecta', 'order': 'Diptera', 'family': 'Culicidae', 'genus': 'Anopheles', 'species': 'Anopheles arabiensis'}	Anopheles arabiensis
GTTTTCAACTAGCAATAATCGCACCTC	GTTTTCAACTAGCAATAATCGCACCTCGGTTGTACCTCATTGGTTACGATATCGCCAACGCTTGGCGGCCACAAGCCAGT	GTTTTCAACTAGCAATAATCGCACCTCGGATGAAAAATGTGGAACGCTTCACGATTTTGCGTGTCATCCTTGCGCAGGGGC	1	D1	GGTTGTACCTCATTGGTTACGATATCGC	CAACGCTTGGCGGCCACAAGCCAGTT	0.0714286		tttg{cG-Gt(catc-tt)gCgCa}gg-gc	0.0116934		Anopheles arabiensis genome assembly, chromosome: 2	{'superkingdom': 'Eukaryota', 'phylum': 'Arthropoda', 'class': 'Insecta', 'order': 'Diptera', 'family': 'Culicidae', 'genus': 'Anopheles', 'species': 'Anopheles arabiensis'}	Anopheles arabiensis
GTTTTCAACTAGCAATAATCGCACCTC	GTTTTCAACTAGCAATAATCGCACCTCGGTTGTACCTCATTGGTTACGATATCGCCAACGCTTGGCGGCCACAAGCCAGT	GTTTTCAACTAGCAATAATCGCACCTCGGATGTACCATGAAAGATCTGTCGTCGGTGCGAGACCATACGATCAACAAAATT	1	D1	GGTTGTACCTCATTGGTTACGATATCGC	CAACGCTTGGCGGCCACAAGCCAGTT	0.0714286		tgcg{aGacc(atacgat)---Ca}a-a--	0.0116934		Anopheles arabiensis genome assembly, chromosome: 2	{'superkingdom': 'Eukaryota', 'phylum': 'Arthropoda', 'class': 'Insecta', 'order': 'Diptera', 'family': 'Culicidae', 'genus': 'Anopheles', 'species': 'Anopheles arabiensis'}	Anopheles arabiensis
GTTTTCAACTAGCAATAATCGCACCTC	GTTTTCAACTAGCAATAATCGCACCTCGGTTGTACCTCATTGGTTACGATATCGCCAACGCTTGGCGGCCACAAGCCAGT	GTTTTCAACTAGCAATAATCGCACCTCGGATGTACCTCATTGACAGGGCCTCGACAGCGGCACGCTGCACCGTCTCCTTCG	1	D1	GGTTGTACCTCATTGGTTACGATATCGC	CAACGCTTGGCGGCCACAAGCCAGTT	0.0714286		agcg{--ac-(ct-ca-c)gtct-}-ttcg	0.0116934		Anopheles arabiensis genome assembly, chromosome: 2	{'superkingdom': 'Eukaryota', 'phylum': 'Arthropoda', 'class': 'Insecta', 'order': 'Diptera', 'family': 'Culicidae', 'genus': 'Anopheles', 'species': 'Anopheles arabiensis'}	Anopheles arabiensis
GTTTTCAACTAGCAATAATCGCACCTC	GTTTTCAACTAGCAATAATCGCACCTCGGTTGTACCTCATTGGTTACGATATCGCCAACGCTTGGCGGCCACAAGCCAGT	GTTTTCAACTAGCAATAATCGCACCTCGGATGTACCTCATTGGTTACGATATCGCAAGAGCGGTGTGTACAAAGGGCAGGG	1	D1	GGTTGTACCTCATTGGTTACGATATCGC	CAACGCTTGGCGGCCACAAGCCAGTT	0.0714286		a-ga{--ggT(-t-ta--)A-g-g}---gg	0.0116934	U4 spliceosomal RNA	Anopheles arabiensis genome assembly, chromosome: 2	{'superkingdom': 'Eukaryota', 'phylum': 'Arthropoda', 'class': 'Insecta', 'order': 'Diptera', 'family': 'Culicidae', 'genus': 'Anopheles', 'species': 'Anopheles arabiensis'}	Anopheles arabiensis
TCATGTGTCCTGCAGTTCAAATTCTGA	TCATGTGTCCTGCAGTTCAAATTCTGACGCGCATTTAGCTGCGGTCTTCATCGATCCACGAGCCGAGTGATCCCCAGATCG	TCATGTGTCCTGCAGTTCAAATTCTGACGCGCATTTAGCTGCGGTCTTCATCGATCCACGAGCCGAGTGATCCCCTGCCTA	5	D2	CGCGCATTTAGCTGCCACGAGCCGAGT	CGGTCTTCATCGATGATCCCCAGATCG	0.454545		------{-----()-----}-----t-ccta	0.0119859	5.8S ribosomal RNA	PREDICTED: Malaya genurostris 5.8S ribosomal RNA (LOC131433328), rRNA	{'superkingdom': 'Eukaryota', 'phylum': 'Arthropoda', 'class': 'Insecta', 'order': 'Diptera', 'family': 'Culicidae', 'genus': 'Malaya', 'species': 'Malaya genurostris'}	Malaya genurostris
TCATGTGTCCTGCAGTTCAAATTCTGA	TCATGTGTCCTGCAGTTCAAATTCTGACGCGCATTTAGCTGCGGTCTTCATCGATCCACGAGCCGAGTGATCCCCAGATCG	TCATGTGTCCTGCAGTTCAAATTCTGACGCGCATTTAGCTGCGGTCTTCATCGATCCACGAGCCGAGTGATCCAGATCGGA	4	D2	CGCGCATTTAGCTGCCACGAGCCGAGT	CGGTCTTCATCGATGATCCCCAGATCG	0.363636		------{-----()-----}---ag-tcgga	0.0119859	5.8S ribosomal RNA	PREDICTED: Malaya genurostris 5.8S ribosomal RNA (LOC131433328), rRNA	{'superkingdom': 'Eukaryota', 'phylum': 'Arthropoda', 'class': 'Insecta', 'order': 'Diptera', 'family': 'Culicidae', 'genus': 'Malaya', 'species': 'Malaya genurostris'}	Malaya genurostris
TCATGTGTCCTGCAGTTCAAATTCTGA	TCATGTGTCCTGCAGTTCAAATTCTGACGCGCATTTAGCTGCGGTCTTCATCGATCCACGAGCCGAGTGATCCCCAGATCG	TCATGTGTCCTGCAGTTCAAATTCTGACGCGCATTTAGCTGCGGTCTTCATCGATCCACGAGCCGAGTGATCAGATCGGAA	2	D2	CGCGCATTTAGCTGCCACGAGCCGAGT	CGGTCTTCATCGATGATCCCCAGATCG	0.181818		------{-----()-----}--agatcggaa	0.0119859	5.8S ribosomal RNA	PREDICTED: Malaya genurostris 5.8S ribosomal RNA (LOC131433328), rRNA	{'superkingdom': 'Eukaryota', 'phylum': 'Arthropoda', 'class': 'Insecta', 'order': 'Diptera', 'family': 'Culicidae', 'genus': 'Malaya', 'species': 'Malaya genurostris'}	Malaya genurostris
TAGTACTTAGACATGCATGGCTTAACC	TAGTACTTAGACATGCATGGCTTAACCTTTGAGACAAGCGTATATTACTGGTAGGATCAACCAGAATTCGTCGACATTAGC	TAGTACTTAGACATGCATGGCTTAACCTTTGAGACAAGCGTATATTACTGGTAGGATCAACCAGAATTCTTCGACACACGA	10	D3	TTTGAGACAAGCGTCGTCGACATTAGC	ATATTACTGGTAGGATCAACCAGAATT	0.526316		------{-----(-------)-----}----	0.0121628	18S ribosomal RNA	Culex torrentium clone torrentium2 28S ribosomal RNA gene, partial sequence; 28S-18S ribosomal RNA intergenic spacer, complete sequence; and 18S ribosomal RNA gene, partial sequence	{'superkingdom': 'Eukaryota', 'phylum': 'Arthropoda', 'class': 'Insecta', 'order': 'Diptera', 'family': 'Culicidae', 'genus': 'Culex', 'species': 'Culex torrentium'}	Culex torrentium
TAGTACTTAGACATGCATGGCTTAACC	TAGTACTTAGACATGCATGGCTTAACCTTTGAGACAAGCGTATATTACTGGTAGGATCAACCAGAATTCGTCGACATTAGC	TAGTACTTAGACATGCATGGCTTAACCTTTGAGACAAGCGTATATTACTGGTAGGATCAACCAGAATTCGTCAGCATCGCC	5	D3	TTTGAGACAAGCGTCGTCGACATTAGC	ATATTACTGGTAGGATCAACCAGAATT	0.263158		------{-----(-------)-----}----	0.0121628	18S ribosomal RNA	Culex torrentium clone torrentium2 28S ribosomal RNA gene, partial sequence; 28S-18S ribosomal RNA intergenic spacer, complete sequence; and 18S ribosomal RNA gene, partial sequence	{'superkingdom': 'Eukaryota', 'phylum': 'Arthropoda', 'class': 'Insecta', 'order': 'Diptera', 'family': 'Culicidae', 'genus': 'Culex', 'species': 'Culex torrentium'}	Culex torrentium
TAGTACTTAGACATGCATGGCTTAACC	TAGTACTTAGACATGCATGGCTTAACCTTTGAGACAAGCGTATATTACTGGTAGGATCAACCAGAATTCGTCGACATTAGC	TAGTACTTAGACATGCATGGCTTAACCTTTGAGACAAGCGTATATTACTGGTAGGATCAACCAGAATTCTCGTCGTGGATA	4	D3	TTTGAGACAAGCGTCGTCGACATTAGC	ATATTACTGGTAGGATCAACCAGAATT	0.210526		------{-----(-------)-----}----	0.0121628	18S ribosomal RNA	Culex torrentium clone torrentium2 28S ribosomal RNA gene, partial sequence; 28S-18S ribosomal RNA intergenic spacer, complete sequence; and 18S ribosomal RNA gene, partial sequence	{'superkingdom': 'Eukaryota', 'phylum': 'Arthropoda', 'class': 'Insecta', 'order': 'Diptera', 'family': 'Culicidae', 'genus': 'Culex', 'species': 'Culex torrentium'}	Culex torrentium
CCCAAGTGGTCACCCATCTAAGTACTA	CCCAAGTGGTCACCCATCTAAGTACTAATCGCGCCCGATGTTGCTTAACTTCAGTGATCGGACGAGAACTGGTGTTTTCAA	CCCAAGTGGTCACCCATCTAAGTACTAATCGCGCCCGATGTTGCTTAACTTCAGTGATCGGACGAGAACTGGTAGATCGGA	18	D2	ATCGCGCCCGATGTGATCGGACGAGAA	TGCTTAACTTCAGTCTGGTGTTTTCAA	0.5625	-------{-----(---)-----}-------		0.0123689	5S ribosomal RNA	PREDICTED: Aedes albopictus 5S ribosomal RNA (LOC134289285), rRNA	{'superkingdom': 'Eukaryota', 'phylum': 'Arthropoda', 'class': 'Insecta', 'order': 'Diptera', 'family': 'Culicidae', 'genus': 'Aedes', 'species': 'Aedes albopictus'}	Aedes albopictus
CCCAAGTGGTCACCCATCTAAGTACTA	CCCAAGTGGTCACCCATCTAAGTACTAATCGCGCCCGATGTTGCTTAACTTCAGTGATCGGACGAGAACTGGTGTTTTCAA	CCCAAGTGGTCACCCATCTAAGTACTAATCGCGCCCGATGTTGCTTAACTTCAGTGATCGGACGAGAACCAGATCGGAAGA	5	D2	ATCGCGCCCGATGTGATCGGACGAGAA	TGCTTAACTTCAGTCTGGTGTTTTCAA	0.15625	-------{-----(---)-----}-------		0.0123689	5S ribosomal RNA	PREDICTED: Aedes albopictus 5S ribosomal RNA (LOC134289285), rRNA	{'superkingdom': 'Eukaryota', 'phylum': 'Arthropoda', 'class': 'Insecta', 'order': 'Diptera', 'family': 'Culicidae', 'genus': 'Aedes', 'species': 'Aedes albopictus'}	Aedes albopictus
CCCAAGTGGTCACCCATCTAAGTACTA	CCCAAGTGGTCACCCATCTAAGTACTAATCGCGCCCGATGTTGCTTAACTTCAGTGATCGGACGAGAACTGGTGTTTTCAA	CCCAAGTGGTCACCCATCTAAGTACTAATCGCGCCCGATGTTGCTTAACTTCAGTGATCGGACGAGAACTGAGATCGGAAG	5	D2	ATCGCGCCCGATGTGATCGGACGAGAA	TGCTTAACTTCAGTCTGGTGTTTTCAA	0.15625	-------{-----(---)-----}-------		0.0123689	5S ribosomal RNA	PREDICTED: Aedes albopictus 5S ribosomal RNA (LOC134289285), rRNA	{'superkingdom': 'Eukaryota', 'phylum': 'Arthropoda', 'class': 'Insecta', 'order': 'Diptera', 'family': 'Culicidae', 'genus': 'Aedes', 'species': 'Aedes albopictus'}	Aedes albopictus
CCCAAGTGGTCACCCATCTAAGTACTA	CCCAAGTGGTCACCCATCTAAGTACTAATCGCGCCCGATGTTGCTTAACTTCAGTGATCGGACGAGAACTGGTGTTTTCAA	CCCAAGTGGTCACCCATCTAAGTACTAATCGCGCCCGATGTTGCTTAACTTCAGTGATCGGACGAGAACTGGTGAGATCGG	4	D2	ATCGCGCCCGATGTGATCGGACGAGAA	TGCTTAACTTCAGTCTGGTGTTTTCAA	0.125	-------{-----(---)-----}-------		0.0123689	5S ribosomal RNA	PREDICTED: Aedes albopictus 5S ribosomal RNA (LOC134289285), rRNA	{'superkingdom': 'Eukaryota', 'phylum': 'Arthropoda', 'class': 'Insecta', 'order': 'Diptera', 'family': 'Culicidae', 'genus': 'Aedes', 'species': 'Aedes albopictus'}	Aedes albopictus
GGTCACCCATCTAAGTACTAATCGTGC	GGTCACCCATCTAAGTACTAATCGTGCCCGATGTTGCTTAACTTCAGTGATCGGACGAGAACTGGTGTTTTCAAGATCGGA	GGTCACCCATCTAAGTACTAATCGTGCCCGATGTTGCTTAACTTCAGTGATCGGACGAGAACTGGTGTTTTCAACAGATCG	3	D1	CCGATGTTGCTTAACTTCAGTGATCGGA	CGAGAACTGGTGTTTTCAAGATCGGA	0.375	{-----(-----------------)-----}-		0.0125069	5S ribosomal RNA		{'superkingdom': 'Eukaryota', 'phylum': 'Arthropoda', 'class': 'Insecta', 'order': 'Diptera', 'family': 'Culicidae', 'genus': 'Armigeres', 'species': 'Armigeres subalbatus'}	Armigeres subalbatus
GGTCACCCATCTAAGTACTAATCGTGC	GGTCACCCATCTAAGTACTAATCGTGCCCGATGTTGCTTAACTTCAGTGATCGGACGAGAACTGGTGTTTTCAAGATCGGA	GGTCACCCATCTAAGTACTAATCGTGCCCGATGTTGCTTAACTTCAGTGATCGGACGAGAACTGGTGTTTTCAGATCGGAA	2	D1	CCGATGTTGCTTAACTTCAGTGATCGGA	CGAGAACTGGTGTTTTCAAGATCGGA	0.25	{-----(-----------------)-----}-		0.0125069	5S ribosomal RNA		{'superkingdom': 'Eukaryota', 'phylum': 'Arthropoda', 'class': 'Insecta', 'order': 'Diptera', 'family': 'Culicidae', 'genus': 'Armigeres', 'species': 'Armigeres subalbatus'}	Armigeres subalbatus
GGTCACCCATCTAAGTACTAATCGTGC	GGTCACCCATCTAAGTACTAATCGTGCCCGATGTTGCTTAACTTCAGTGATCGGACGAGAACTGGTGTTTTCAAGATCGGA	GGTCACCCATCTAAGTACTAATCGTGCCCGATGTTGCTTAACTTCAGTGATCGGACGAGAACCGGTGTTTTAGATCGGAAG	1	D1	CCGATGTTGCTTAACTTCAGTGATCGGA	CGAGAACTGGTGTTTTCAAGATCGGA	0.125	{-----(-----------------)-----}-		0.0125069	5S ribosomal RNA		{'superkingdom': 'Eukaryota', 'phylum': 'Arthropoda', 'class': 'Insecta', 'order': 'Diptera', 'family': 'Culicidae', 'genus': 'Armigeres', 'species': 'Armigeres subalbatus'}	Armigeres subalbatus
GGTCACCCATCTAAGTACTAATCGTGC	GGTCACCCATCTAAGTACTAATCGTGCCCGATGTTGCTTAACTTCAGTGATCGGACGAGAACTGGTGTTTTCAAGATCGGA	GGTCACCCATCTAAGTACTAATCGTGCCCGATGTTGCTTAACTTCAGTGATCGGACGAGAACCGGTGTTTTCAAAGATCGG	1	D1	CCGATGTTGCTTAACTTCAGTGATCGGA	CGAGAACTGGTGTTTTCAAGATCGGA	0.125	{-----(-----------------)-----}-		0.0125069	5S ribosomal RNA		{'superkingdom': 'Eukaryota', 'phylum': 'Arthropoda', 'class': 'Insecta', 'order': 'Diptera', 'family': 'Culicidae', 'genus': 'Armigeres', 'species': 'Armigeres subalbatus'}	Armigeres subalbatus
GGTCACCCATCTAAGTACTAATCGTGC	GGTCACCCATCTAAGTACTAATCGTGCCCGATGTTGCTTAACTTCAGTGATCGGACGAGAACTGGTGTTTTCAAGATCGGA	GGTCACCCATCTAAGTACTAATCGTGCCCGATGTTGCTTAACTTCAGTGATCGGACGAGAACTGGTGTTTTCAACATGAGA	1	D1	CCGATGTTGCTTAACTTCAGTGATCGGA	CGAGAACTGGTGTTTTCAAGATCGGA	0.125	{-----(-----------------)-----}-		0.0125069	5S ribosomal RNA		{'superkingdom': 'Eukaryota', 'phylum': 'Arthropoda', 'class': 'Insecta', 'order': 'Diptera', 'family': 'Culicidae', 'genus': 'Armigeres', 'species': 'Armigeres subalbatus'}	Armigeres subalbatus
AGAGCCAATCCGTATCCCGAAGTTACG	AGAGCCAATCCGTATCCCGAAGTTACGGATCTAATTTGCCGACTTCCCTTACCTACATTAATCTATCGACTAGAGACTCT	AGAGCCAATCCGTATCCCGAAGTTACGGATCCGGCTTGCCGACTTCCCTTACCTACGTTGCTCCAACATGCCAGAGGCTGT	2	D1	GATCTAATTTGCCGACTTCCCTTACCTA	CATTAATCTATCGACTAGAGACTCTA	0.4		-g--gc--c-a-atg{cCAGa(g)gCTGt}	0.012517	28S ribosomal RNA	PREDICTED: Ochlerotatus camptorhynchus large subunit ribosomal RNA (LOC135717070), rRNA	{'superkingdom': 'Eukaryota', 'phylum': 'Arthropoda', 'class': 'Insecta', 'order': 'Diptera', 'family': 'Culicidae', 'genus': 'Ochlerotatus', 'species': 'Ochlerotatus camptorhynchus'}	Ochlerotatus camptorhynchus
AGAGCCAATCCGTATCCCGAAGTTACG	AGAGCCAATCCGTATCCCGAAGTTACGGATCTAATTTGCCGACTTCCCTTACCTACATTAATCTATCGACTAGAGACTCT	AGAGCCAATCCGTATCCCGAAGTTACGGATCCGGCTTGCCGACTTCCCTTACCTACATTGTTCCAACATGCCAGAGGCGGT	1	D1	GATCTAATTTGCCGACTTCCCTTACCTA	CATTAATCTATCGACTAGAGACTCTA	0.2		----gt--c-a-atg{cCaGa(g)gCgGt}	0.012517	28S ribosomal RNA	PREDICTED: Ochlerotatus camptorhynchus large subunit ribosomal RNA (LOC135717070), rRNA	{'superkingdom': 'Eukaryota', 'phylum': 'Arthropoda', 'class': 'Insecta', 'order': 'Diptera', 'family': 'Culicidae', 'genus': 'Ochlerotatus', 'species': 'Ochlerotatus camptorhynchus'}	Ochlerotatus camptorhynchus
AGAGCCAATCCGTATCCCGAAGTTACG	AGAGCCAATCCGTATCCCGAAGTTACGGATCTAATTTGCCGACTTCCCTTACCTACATTAATCTATCGACTAGAGACTCT	AGAGCCAATCCGTATCCCGAAGTTACGGATCCGGCTTGCCGACTTCCCTTACCTACATTGTTCCAACATGCGAGAGGCTGT	1	D1	GATCTAATTTGCCGACTTCCCTTACCTA	CATTAATCTATCGACTAGAGACTCTA	0.2		----gt--c-a-atg{cgAGa(g)gCTgt}	0.012517	28S ribosomal RNA	PREDICTED: Ochlerotatus camptorhynchus large subunit ribosomal RNA (LOC135717070), rRNA	{'superkingdom': 'Eukaryota', 'phylum': 'Arthropoda', 'class': 'Insecta', 'order': 'Diptera', 'family': 'Culicidae', 'genus': 'Ochlerotatus', 'species': 'Ochlerotatus camptorhynchus'}	Ochlerotatus camptorhynchus
AGAGCCAATCCGTATCCCGAAGTTACG	AGAGCCAATCCGTATCCCGAAGTTACGGATCTAATTTGCCGACTTCCCTTACCTACATTAATCTATCGACTAGAGACTCT	AGAGCCAATCCGTATCCCGAAGTTACGGATGTAAGTTGCCGACGTCCCTTAGCTACATTAATCTATCGGCTAGTGACTCTA	1	D1	GATCTAATTTGCCGACTTCCCTTACCTA	CATTAATCTATCGACTAGAGACTCTA	0.2		-------------g-{---t-(-)-----}	0.012517	28S ribosomal RNA	PREDICTED: Ochlerotatus camptorhynchus large subunit ribosomal RNA (LOC135717070), rRNA	{'superkingdom': 'Eukaryota', 'phylum': 'Arthropoda', 'class': 'Insecta', 'order': 'Diptera', 'family': 'Culicidae', 'genus': 'Ochlerotatus', 'species': 'Ochlerotatus camptorhynchus'}	Ochlerotatus camptorhynchus
AGAGCCAATCCGTATCCCGAAGTTACG	AGAGCCAATCCGTATCCCGAAGTTACGGATCTAATTTGCCGACTTCCCTTACCTACATTAATCTATCGACTAGAGACTCT	AGAGCCAATCCGTATCCCGAAGTTACGGATCCGGCTTGCCGACTTCCCTTACCTACGTTGCTCCAACATGCCAGAGGCTGT	2	D2	GATCTAATTTGCCGCATTAATCTATCG	ACTTCCCTTACCTAACTAGAGACTCTA	0.4		--------------tg{cCAGa(g)gCTGt}	0.012517	28S ribosomal RNA	PREDICTED: Ochlerotatus camptorhynchus large subunit ribosomal RNA (LOC135717070), rRNA	{'superkingdom': 'Eukaryota', 'phylum': 'Arthropoda', 'class': 'Insecta', 'order': 'Diptera', 'family': 'Culicidae', 'genus': 'Ochlerotatus', 'species': 'Ochlerotatus camptorhynchus'}	Ochlerotatus camptorhynchus
AGAGCCAATCCGTATCCCGAAGTTACG	AGAGCCAATCCGTATCCCGAAGTTACGGATCTAATTTGCCGACTTCCCTTACCTACATTAATCTATCGACTAGAGACTCT	AGAGCCAATCCGTATCCCGAAGTTACGGATCCGGCTTGCCGACTTCCCTTACCTACATTGTTCCAACATGCCAGAGGCGGT	1	D2	GATCTAATTTGCCGCATTAATCTATCG	ACTTCCCTTACCTAACTAGAGACTCTA	0.2		--------------tg{cCaGa(g)gCgGt}	0.012517	28S ribosomal RNA	PREDICTED: Ochlerotatus camptorhynchus large subunit ribosomal RNA (LOC135717070), rRNA	{'superkingdom': 'Eukaryota', 'phylum': 'Arthropoda', 'class': 'Insecta', 'order': 'Diptera', 'family': 'Culicidae', 'genus': 'Ochlerotatus', 'species': 'Ochlerotatus camptorhynchus'}	Ochlerotatus camptorhynchus
AGAGCCAATCCGTATCCCGAAGTTACG	AGAGCCAATCCGTATCCCGAAGTTACGGATCTAATTTGCCGACTTCCCTTACCTACATTAATCTATCGACTAGAGACTCT	AGAGCCAATCCGTATCCCGAAGTTACGGATCCGGCTTGCCGACTTCCCTTACCTACATTGTTCCAACATGCGAGAGGCTGT	1	D2	GATCTAATTTGCCGCATTAATCTATCG	ACTTCCCTTACCTAACTAGAGACTCTA	0.2		--------------tg{cgAGa(g)gCTgt}	0.012517	28S ribosomal RNA	PREDICTED: Ochlerotatus camptorhynchus large subunit ribosomal RNA (LOC135717070), rRNA	{'superkingdom': 'Eukaryota', 'phylum': 'Arthropoda', 'class': 'Insecta', 'order': 'Diptera', 'family': 'Culicidae', 'genus': 'Ochlerotatus', 'species': 'Ochlerotatus camptorhynchus'}	Ochlerotatus camptorhynchus
AGAGCCAATCCGTATCCCGAAGTTACG	AGAGCCAATCCGTATCCCGAAGTTACGGATCTAATTTGCCGACTTCCCTTACCTACATTAATCTATCGACTAGAGACTCT	AGAGCCAATCCGTATCCCGAAGTTACGGATGTAAGTTGCCGACGTCCCTTAGCTACATTAATCTATCGGCTAGTGACTCTA	1	D2	GATCTAATTTGCCGCATTAATCTATCG	ACTTCCCTTACCTAACTAGAGACTCTA	0.2		--g-------g---g-{---t-(-)-----}	0.012517	28S ribosomal RNA	PREDICTED: Ochlerotatus camptorhynchus large subunit ribosomal RNA (LOC135717070), rRNA	{'superkingdom': 'Eukaryota', 'phylum': 'Arthropoda', 'class': 'Insecta', 'order': 'Diptera', 'family': 'Culicidae', 'genus': 'Ochlerotatus', 'species': 'Ochlerotatus camptorhynchus'}	Ochlerotatus camptorhynchus
AGAGCCAATCCGTATCCCGAAGTTACG	AGAGCCAATCCGTATCCCGAAGTTACGGATCTAATTTGCCGACTTCCCTTACCTACATTAATCTATCGACTAGAGACTCT	AGAGCCAATCCGTATCCCGAAGTTACGGATCCGGCTTGCCGACTTCCCTTACCTACGTTGCTCCAACATGCCAGAGGCTGT	2	D3	GATCTAATTTGCCGACTAGAGACTCTA	ACTTCCCTTACCTACATTAATCTATCG	0.4	----cggc------tg{cCAGa(g)gCTGt}		0.012517	28S ribosomal RNA	PREDICTED: Ochlerotatus camptorhynchus large subunit ribosomal RNA (LOC135717070), rRNA	{'superkingdom': 'Eukaryota', 'phylum': 'Arthropoda', 'class': 'Insecta', 'order': 'Diptera', 'family': 'Culicidae', 'genus': 'Ochlerotatus', 'species': 'Ochlerotatus camptorhynchus'}	Ochlerotatus camptorhynchus
AGAGCCAATCCGTATCCCGAAGTTACG	AGAGCCAATCCGTATCCCGAAGTTACGGATCTAATTTGCCGACTTCCCTTACCTACATTAATCTATCGACTAGAGACTCT	AGAGCCAATCCGTATCCCGAAGTTACGGATCCGGCTTGCCGACTTCCCTTACCTACATTGTTCCAACATGCCAGAGGCGGT	1	D3	GATCTAATTTGCCGACTAGAGACTCTA	ACTTCCCTTACCTACATTAATCTATCG	0.2	----cggc------tg{cCaGa(g)gCgGt}		0.012517	28S ribosomal RNA	PREDICTED: Ochlerotatus camptorhynchus large subunit ribosomal RNA (LOC135717070), rRNA	{'superkingdom': 'Eukaryota', 'phylum': 'Arthropoda', 'class': 'Insecta', 'order': 'Diptera', 'family': 'Culicidae', 'genus': 'Ochlerotatus', 'species': 'Ochlerotatus camptorhynchus'}	Ochlerotatus camptorhynchus
AGAGCCAATCCGTATCCCGAAGTTACG	AGAGCCAATCCGTATCCCGAAGTTACGGATCTAATTTGCCGACTTCCCTTACCTACATTAATCTATCGACTAGAGACTCT	AGAGCCAATCCGTATCCCGAAGTTACGGATCCGGCTTGCCGACTTCCCTTACCTACATTGTTCCAACATGCGAGAGGCTGT	1	D3	GATCTAATTTGCCGACTAGAGACTCTA	ACTTCCCTTACCTACATTAATCTATCG	0.2	----cggc------tg{cgAGa(g)gCTgt}		0.012517	28S ribosomal RNA	PREDICTED: Ochlerotatus camptorhynchus large subunit ribosomal RNA (LOC135717070), rRNA	{'superkingdom': 'Eukaryota', 'phylum': 'Arthropoda', 'class': 'Insecta', 'order': 'Diptera', 'family': 'Culicidae', 'genus': 'Ochlerotatus', 'species': 'Ochlerotatus camptorhynchus'}	Ochlerotatus camptorhynchus
AGAGCCAATCCGTATCCCGAAGTTACG	AGAGCCAATCCGTATCCCGAAGTTACGGATCTAATTTGCCGACTTCCCTTACCTACATTAATCTATCGACTAGAGACTCT	AGAGCCAATCCGTATCCCGAAGTTACGGATGTAAGTTGCCGACGTCCCTTAGCTACATTAATCTATCGGCTAGTGACTCTA	1	D3	GATCTAATTTGCCGACTAGAGACTCTA	ACTTCCCTTACCTACATTAATCTATCG	0.2	---g---g------g-{---t-(-)-----}		0.012517	28S ribosomal RNA	PREDICTED: Ochlerotatus camptorhynchus large subunit ribosomal RNA (LOC135717070), rRNA	{'superkingdom': 'Eukaryota', 'phylum': 'Arthropoda', 'class': 'Insecta', 'order': 'Diptera', 'family': 'Culicidae', 'genus': 'Ochlerotatus', 'species': 'Ochlerotatus camptorhynchus'}	Ochlerotatus camptorhynchus
TTAATGTGTCCTGCAGTTCACATTCTG	TTAATGTGTCCTGCAGTTCACATTCTGACGCGCATTTAGCTGCGGTCTTCATCGATCCACGAGCCGAGTGATCCCCAGATC	TTAATGTGTCCTGCAGTTCACATTCTGACGCGCATTTAGCTGCGGTCTTCATCGATCCACGAGCCGAGTGATCCAGATCGG	9	D2	ACGCGCATTTAGCTTCCACGAGCCGAG	GCGGTCTTCATCGATGATCCCCAGATC	0.375		-------{-----()-----}---ag-tcgg	0.0126056	5.8S ribosomal RNA		{'superkingdom': 'Eukaryota', 'phylum': 'Arthropoda', 'class': 'Insecta', 'order': 'Diptera', 'family': 'Culicidae', 'genus': 'Malaya', 'species': 'Malaya genurostris'}	Malaya genurostris
TTAATGTGTCCTGCAGTTCACATTCTG	TTAATGTGTCCTGCAGTTCACATTCTGACGCGCATTTAGCTGCGGTCTTCATCGATCCACGAGCCGAGTGATCCCCAGATC	TTAATGTGTCCTGCAGTTCACATTCTGACGCGCATTTAGCTGCGGTCTTCATCGATCCACGAGCCGAGTGATCCCCTGAGA	5	D2	ACGCGCATTTAGCTTCCACGAGCCGAG	GCGGTCTTCATCGATGATCCCCAGATC	0.208333		-------{-----()-----}-----t--ga	0.0126056	5.8S ribosomal RNA		{'superkingdom': 'Eukaryota', 'phylum': 'Arthropoda', 'class': 'Insecta', 'order': 'Diptera', 'family': 'Culicidae', 'genus': 'Malaya', 'species': 'Malaya genurostris'}	Malaya genurostris
[truncated: 449 more rows]

## Sheet: Suppl_Table_9
anchor	base_compactor	compactor	support	segment_index	base_S1	base_S2	weight	strucNotation_1	strucNotation_2	anchor_p_BH	BLAST_hits	taxonomy	species
[truncated: 201 more rows]
